# Supplementary material for: Disruption of Hypoxia-Inducible Factor 1 in Adipocytes Improves Insulin Sensitivity and Decreases Adiposity in High-Fat Diet–Fed Mice
Source: Oxford University Press journal article supplement (doi:10.2337/db11-0174), 2011-08-27
Supplement: db110174supplementarydata1.xls [file db110174supplementarydata1.xls]

## Sheet: Arnt-Up
ProbeName	Fold Change	GeneSymbol	GenbankAccession	Description
A_52_P483983	23.0836	NAP025923-1
A_51_P156955	22.2718	Cfd	NM_013459	Mus musculus complement factor D (adipsin) (Cfd), mRNA [NM_013459]
A_51_P283456	14.7634	Cyp2e1	NM_021282	Mus musculus cytochrome P450, family 2, subfamily e, polypeptide 1 (Cyp2e1), mRNA [NM_021282]
A_51_P359432	12.0644	AK045942	AK045942	Mus musculus adult male corpora quadrigemina cDNA, RIKEN full-length enriched library, clone:B230325I23 product:hypothetical protein, full insert sequence. [AK045942]
A_51_P431329	10.8149	Car3	NM_007606	Mus musculus carbonic anhydrase 3 (Car3), mRNA [NM_007606]
A_52_P639461	10.1917	Car3	AK075630	Mus musculus 18-day embryo whole body cDNA, RIKEN full-length enriched library, clone:1110020O19 product:carbonic anhydrase 3, full insert sequence [AK075630]
A_51_P424532	10.0907	Vnn1	NM_011704	Mus musculus vanin 1 (Vnn1), mRNA [NM_011704]
A_52_P484956	9.9407	Nnat	NM_010923	Mus musculus neuronatin (Nnat), transcript variant 1, mRNA [NM_010923]
A_51_P162162	9.16564	Inmt	NM_009349	Mus musculus indolethylamine N-methyltransferase (Inmt), mRNA [NM_009349]
A_51_P509679	8.48221	Igh	BC004786	Mus musculus immunoglobulin heavy chain complex, mRNA (cDNA clone MGC:6727 IMAGE:3588636), complete cds. [BC004786]
A_51_P375969	8.34051	Ces3	NM_053200	Mus musculus carboxylesterase 3 (Ces3), mRNA [NM_053200]
A_52_P496726	7.98561	Rasd1	NM_009026	Mus musculus RAS, dexamethasone-induced 1 (Rasd1), mRNA [NM_009026]
A_51_P265374	7.30101	Vnn3	NM_011979	Mus musculus vanin 3 (Vnn3), mRNA [NM_011979]
A_52_P347176	7.04998	Nat8l	NM_001001985	Mus musculus N-acetyltransferase 8-like (Nat8l), mRNA [NM_001001985]
A_52_P432124	6.97284	Gsta3	NM_010356	Mus musculus glutathione S-transferase, alpha 3 (Gsta3), transcript variant 2, mRNA [NM_010356]
A_52_P354744	6.63608	Slc2a3	NM_011401	Mus musculus solute carrier family 2 (facilitated glucose transporter), member 3 (Slc2a3), mRNA [NM_011401]
A_51_P178772	6.59272	AU018778	NM_144930	Mus musculus expressed sequence AU018778 (AU018778), mRNA [NM_144930]
A_52_P532456	6.57681	Plagl1	BC065150	Mus musculus pleiomorphic adenoma gene-like 1, mRNA (cDNA clone IMAGE:6856210). [BC065150]
A_51_P355427	6.53298	Timp4	NM_080639	Mus musculus tissue inhibitor of metalloproteinase 4 (Timp4), mRNA [NM_080639]
A_51_P250217	6.50316
A_52_P364021	6.49033	Mogat1	NM_026713	Mus musculus monoacylglycerol O-acyltransferase 1 (Mogat1), mRNA [NM_026713]
A_51_P503625	6.47351	Gsta3	NM_010356	Mus musculus glutathione S-transferase, alpha 3 (Gsta3), transcript variant 2, mRNA [NM_010356]
A_51_P194099	6.4337	Thrsp	NM_009381	Mus musculus thyroid hormone responsive SPOT14 homolog (Rattus) (Thrsp), mRNA [NM_009381]
A_51_P292008	6.02533	Gpx3	NM_008161	Mus musculus glutathione peroxidase 3 (Gpx3), transcript variant 2, mRNA [NM_008161]
A_51_P127297	5.93454	Hsd11b1	NM_008288	Mus musculus hydroxysteroid 11-beta dehydrogenase 1 (Hsd11b1), transcript variant 1, mRNA [NM_008288]
A_52_P503663	5.81372	Gpr120	NM_181748	Mus musculus G protein-coupled receptor 120 (Gpr120), mRNA [NM_181748]
A_51_P383638	5.66842	Amy1	NM_007446	Mus musculus amylase 1, salivary (Amy1), mRNA [NM_007446]
A_51_P458451	5.53284	Adipoq	NM_009605	Mus musculus adiponectin, C1Q and collagen domain containing (Adipoq), mRNA [NM_009605]
A_51_P474902	5.45915	Acvr1c	NM_001033369	Mus musculus activin A receptor, type IC (Acvr1c), mRNA [NM_001033369]
A_52_P378975	5.42301	Slc1a3	AK050752	Mus musculus 9 days embryo whole body cDNA, RIKEN full-length enriched library, clone:D030016F20 product:unclassifiable, full insert sequence [AK050752]
A_51_P233597	5.40058	Retn	NM_022984	Mus musculus resistin (Retn), mRNA [NM_022984]
A_51_P268697	5.37742	Slc1a3	NM_148938	Mus musculus solute carrier family 1 (glial high affinity glutamate transporter), member 3 (Slc1a3), mRNA [NM_148938]
A_51_P323712	5.3292	Agt	NM_007428	Mus musculus angiotensinogen (serpin peptidase inhibitor, clade A, member 8) (Agt), mRNA [NM_007428]
A_52_P318040	5.28221	Acaca	NM_133360	Mus musculus acetyl-Coenzyme A carboxylase alpha (Acaca), mRNA [NM_133360]
A_51_P453909	5.23493	Cyp2f2	NM_007817	Mus musculus cytochrome P450, family 2, subfamily f, polypeptide 2 (Cyp2f2), mRNA [NM_007817]
A_51_P104241	5.21976	Zfp185	NM_009549	Mus musculus zinc finger protein 185 (Zfp185), mRNA [NM_009549]
A_51_P189814	5.1097	Cldn5	NM_013805	Mus musculus claudin 5 (Cldn5), mRNA [NM_013805]
A_51_P157840	5.10463	Chst1	NM_023850	Mus musculus carbohydrate (keratan sulfate Gal-6) sulfotransferase 1 (Chst1), mRNA [NM_023850]
A_51_P493649	4.99826	Sult1e1	NM_023135	Mus musculus sulfotransferase family 1E, member 1 (Sult1e1), mRNA [NM_023135]
A_52_P55972	4.99761	Retn	NM_022984	Mus musculus resistin (Retn), mRNA [NM_022984]
A_51_P408082	4.98201	Apoa1	NM_009692	Mus musculus apolipoprotein A-I (Apoa1), mRNA [NM_009692]
A_52_P384264	4.93158	Zfp185	NM_009549	Mus musculus zinc finger protein 185 (Zfp185), mRNA [NM_009549]
A_51_P317191	4.91888	2310005P05Rik	NM_026189	Mus musculus RIKEN cDNA 2310005P05 gene (2310005P05Rik), mRNA [NM_026189]
A_51_P468005	4.90701	Fmo5	NM_010232	Mus musculus flavin containing monooxygenase 5 (Fmo5), mRNA [NM_010232]
A_51_P383755	4.89911	1110006G14Rik	XM_001001687	PREDICTED: Mus musculus RIKEN cDNA 1110006G14 gene (1110006G14Rik), mRNA [XM_001001687]
A_51_P424954	4.89331	B230114P17Rik	AK045415	Mus musculus adult male corpora quadrigemina cDNA, RIKEN full-length enriched library, clone:B230114P17 product:unclassifiable, full insert sequence [AK045415]
A_52_P614777	4.86485	Sucnr1	NM_032400	Mus musculus succinate receptor 1 (Sucnr1), mRNA [NM_032400]
A_52_P647326	4.79575	Acvr1c	NM_001033369	Mus musculus activin A receptor, type IC (Acvr1c), mRNA [NM_001033369]
A_51_P175018	4.77907	Apcdd1	AK157407	Mus musculus activated spleen cDNA, RIKEN full-length enriched library, clone:F830213N15 product:Ethanol induced gene product, full insert sequence. [AK157407]
A_51_P472531	4.77603	Arsk	NM_029847	Mus musculus arylsulfatase K (Arsk), mRNA [NM_029847]
A_52_P645862	4.74842	Agtr1a	NM_177322	Mus musculus angiotensin II receptor, type 1a (Agtr1a), mRNA [NM_177322]
A_51_P385351	4.73056	Slc44a3	NM_145394	Mus musculus solute carrier family 44, member 3 (Slc44a3), mRNA [NM_145394]
A_51_P146970	4.72913	Dmrt2	NM_145831	Mus musculus doublesex and mab-3 related transcription factor 2 (Dmrt2), mRNA [NM_145831]
A_51_P112151	4.70631	Mogat1	NM_026713	Mus musculus monoacylglycerol O-acyltransferase 1 (Mogat1), mRNA [NM_026713]
A_51_P320146	4.70312	AK046159	AK046159	Mus musculus adult male corpora quadrigemina cDNA, RIKEN full-length enriched library, clone:B230345M08 product:unclassifiable, full insert sequence. [AK046159]
A_52_P504859	4.634	A530020G20Rik	AK040960	Mus musculus adult male aorta and vein cDNA, RIKEN full-length enriched library, clone:A530051K04 product:unclassifiable, full insert sequence [AK040960]
A_51_P487818	4.54429	Fabp1	NM_017399	Mus musculus fatty acid binding protein 1, liver (Fabp1), mRNA [NM_017399]
A_51_P329949	4.50444	D430015B01Rik	NM_153574	Mus musculus RIKEN cDNA D430015B01 gene (D430015B01Rik), mRNA [NM_153574]
A_51_P516006	4.49981	Ntrk2	AK018789	Mus musculus adult male cerebellum cDNA, RIKEN full-length enriched library, clone:1500040I13 product:neurotrophic tyrosine kinase, receptor, type 2, full insert sequence. [AK018789]
A_51_P167551	4.479	BC031353	NM_153584	Mus musculus cDNA sequence BC031353 (BC031353), mRNA [NM_153584]
A_51_P398766	4.46945	Gbp1	NM_010259	Mus musculus guanylate nucleotide binding protein 1 (Gbp1), mRNA [NM_010259]
A_51_P443403	4.46708	Smoc1	NM_022316	Mus musculus SPARC related modular calcium binding 1 (Smoc1), mRNA [NM_022316]
A_52_P342303	4.44553	Gm1967	NM_001033452	Mus musculus gene model 1967, (NCBI) (Gm1967), mRNA [NM_001033452]
A_51_P132530	4.43438	Cldn22	AK008821	Mus musculus adult male stomach cDNA, RIKEN full-length enriched library, clone:2210404A22 product:hypothetical PMP-22/EMP/MP20 and claudin family containing protein, full insert sequence. [AK008821]
A_52_P306351	4.41632	Asph	AK165260	Mus musculus 6 days neonate spleen cDNA, RIKEN full-length enriched library, clone:F430004K08 product:aspartate-beta-hydroxylase, full insert sequence. [AK165260]
A_52_P176405	4.35825	Arx	NM_007492	Mus musculus aristaless related homeobox gene (Drosophila) (Arx), mRNA [NM_007492]
A_52_P256757	4.35371	Rhbdl1	NM_144816	Mus musculus rhomboid, veinlet-like 1 (Drosophila) (Rhbdl1), mRNA [NM_144816]
A_52_P428699	4.3351	C2	NM_013484	Mus musculus complement component 2 (within H-2S) (C2), mRNA [NM_013484]
A_52_P681771	4.32142	Pnpla2	NM_025802	Mus musculus patatin-like phospholipase domain containing 2 (Pnpla2), mRNA [NM_025802]
A_52_P356343	4.31139	D430015B01Rik	NM_153574	Mus musculus RIKEN cDNA D430015B01 gene (D430015B01Rik), mRNA [NM_153574]
A_51_P476169	4.28302	Sfrp5	NM_018780	Mus musculus secreted frizzled-related sequence protein 5 (Sfrp5), mRNA [NM_018780]
A_52_P29610	4.27852	Ttpa	NM_015767	Mus musculus tocopherol (alpha) transfer protein (Ttpa), mRNA [NM_015767]
A_52_P64383	4.26585	Klf15	NM_023184	Mus musculus Kruppel-like factor 15 (Klf15), mRNA [NM_023184]
A_52_P286166	4.2592	Penk1	NM_001002927	Mus musculus preproenkephalin 1 (Penk1), mRNA [NM_001002927]
A_51_P271984	4.25165	Tmem45b	NM_144936	Mus musculus transmembrane protein 45b (Tmem45b), mRNA [NM_144936]
A_52_P629487	4.24695	Selenbp1	NM_009150	Mus musculus selenium binding protein 1 (Selenbp1), mRNA [NM_009150]
A_52_P356093	4.24679	B3galt2	NM_020025	Mus musculus UDP-Gal:betaGlcNAc beta 1,3-galactosyltransferase, polypeptide 2 (B3galt2), mRNA [NM_020025]
A_51_P197213	4.23634	Pnpla2	NM_025802	Mus musculus patatin-like phospholipase domain containing 2 (Pnpla2), mRNA [NM_025802]
A_51_P408625	4.22999	AK019527	AK019527	Mus musculus 0 day neonate head cDNA, RIKEN full-length enriched library, clone:4833444L21 product:hypothetical protein, full insert sequence. [AK019527]
A_51_P218975	4.22874	Kcns3	NM_173417	Mus musculus potassium voltage-gated channel, delayed-rectifier, subfamily S, member 3 (Kcns3), mRNA [NM_173417]
A_51_P520421	4.22611	1110003F10Rik	AK003351	Mus musculus 18-day embryo whole body cDNA, RIKEN full-length enriched library, clone:1110003F10 product:unclassifiable, full insert sequence. [AK003351]
A_52_P508991	4.21743	Fmo1	NM_010231	Mus musculus flavin containing monooxygenase 1 (Fmo1), mRNA [NM_010231]
A_52_P326664	4.20685	Unc93a	NM_199252	Mus musculus unc-93 homolog A (C. elegans) (Unc93a), mRNA [NM_199252]
A_52_P293482	4.17983	Lgals12	NM_019516	Mus musculus lectin, galactose binding, soluble 12 (Lgals12), mRNA [NM_019516]
A_51_P217498	4.14457	Slc2a4	NM_009204	Mus musculus solute carrier family 2 (facilitated glucose transporter), member 4 (Slc2a4), mRNA [NM_009204]
A_52_P225856	4.11088	A130038J17Rik	AK038150	Mus musculus 16 days neonate thymus cDNA, RIKEN full-length enriched library, clone:A130082E16 product:unclassifiable, full insert sequence. [AK038150]
A_52_P686231	4.10569	A530020G20Rik	AK040960	Mus musculus adult male aorta and vein cDNA, RIKEN full-length enriched library, clone:A530051K04 product:unclassifiable, full insert sequence [AK040960]
A_52_P622230	4.09279	A630049P17	AK041972	Mus musculus 3 days neonate thymus cDNA, RIKEN full-length enriched library, clone:A630049P17 product:unclassifiable, full insert sequence. [AK041972]
A_51_P220414	4.06995	Zfp235	NM_019941	Mus musculus zinc finger protein 235 (Zfp235), mRNA [NM_019941]
A_52_P376574	4.05295	Pcsk6	XM_355911	PREDICTED: Mus musculus proprotein convertase subtilisin [XM_355911]
A_51_P267933	4.04201	A930034L06Rik	NM_175692	Mus musculus RIKEN cDNA A930034L06 gene (A930034L06Rik), mRNA [NM_175692]
A_52_P963853	4.03142	AK081111	AK081111	Mus musculus 10 days neonate cerebellum cDNA, RIKEN full-length enriched library, clone:B930089C24 product:unclassifiable, full insert sequence. [AK081111]
A_52_P293120	4.00915	Prrg3	NM_001081135	Mus musculus proline rich Gla (G-carboxyglutamic acid) 3 (transmembrane) (Prrg3), mRNA [NM_001081135]
A_51_P424854	4.00457	Ahsg	NM_013465	Mus musculus alpha-2-HS-glycoprotein (Ahsg), mRNA [NM_013465]
A_52_P795929	4.00069	AK081614	AK081614	Mus musculus 16 days embryo head cDNA, RIKEN full-length enriched library, clone:C130051K14 product:unclassifiable, full insert sequence [AK081614]
A_51_P148221	3.99951	B3galt2	NM_020025	Mus musculus UDP-Gal:betaGlcNAc beta 1,3-galactosyltransferase, polypeptide 2 (B3galt2), mRNA [NM_020025]
A_51_P468231	3.99543	Ptprd	NM_011211	Mus musculus protein tyrosine phosphatase, receptor type, D (Ptprd), transcript variant b, mRNA [NM_011211]
A_52_P642726	3.98783	Apcdd1	NM_133237	Mus musculus adenomatosis polyposis coli down-regulated 1 (Apcdd1), mRNA [NM_133237]
A_52_P424784	3.97135	Clstn2	NM_022319	Mus musculus calsyntenin 2 (Clstn2), mRNA [NM_022319]
A_51_P241465	3.9441	Gsn	NM_146120	Mus musculus gelsolin (Gsn), mRNA [NM_146120]
A_52_P544433	3.93163	ENSMUST00000103330		Immunoglobulin Kappa light chain V gene segment [Source:IMGT/GENE_DB;Acc:IGKV10-94] [ENSMUST00000103330]
A_51_P293729	3.9286	Ivns1abp	NM_054102	Mus musculus influenza virus NS1A binding protein (Ivns1abp), transcript variant 2, mRNA [NM_054102]
A_52_P18116	3.92255	Ccl24	NM_019577	Mus musculus chemokine (C-C motif) ligand 24 (Ccl24), mRNA [NM_019577]
A_52_P132591	3.91062	ENSMUST00000103201		acetyl-Coenzyme A carboxylase alpha [Source:MarkerSymbol;Acc:MGI:108451] [ENSMUST00000103201]
A_51_P415555	3.90316	Amy2	NM_009669	Mus musculus amylase 2, pancreatic (Amy2), mRNA [NM_009669]
A_51_P268754	3.90296	E430004N04Rik	NM_178666	Mus musculus RIKEN cDNA E430004N04 gene (E430004N04Rik), mRNA [NM_178666]
A_51_P431018	3.90145	Selenbp2	NM_019414	Mus musculus selenium binding protein 2 (Selenbp2), mRNA [NM_019414]
A_51_P171999	3.88875	Apoe	NM_009696	Mus musculus apolipoprotein E (Apoe), mRNA [NM_009696]
A_51_P305140	3.86285	Gsta1	NM_008181	Mus musculus glutathione S-transferase, alpha 1 (Ya) (Gsta1), mRNA [NM_008181]
A_52_P263774	3.86281	Cbx7	NM_144811	Mus musculus chromobox homolog 7 (Cbx7), mRNA [NM_144811]
A_52_P237077	3.86241	Esr1	NM_007956	Mus musculus estrogen receptor 1 (alpha) (Esr1), mRNA [NM_007956]
A_51_P325889	3.85021	4933407L21Rik	AK037440	Mus musculus 16 days neonate thymus cDNA, RIKEN full-length enriched library, clone:A130019C19 product:unclassifiable, full insert sequence [AK037440]
A_52_P134023	3.84238	Rtp3	NM_153100	Mus musculus receptor transporter protein 3 (Rtp3), mRNA [NM_153100]
A_51_P356642	3.84076	Krt19	NM_008471	Mus musculus keratin 19 (Krt19), mRNA [NM_008471]
A_51_P338485	3.8361	Aldh6a1	NM_134042	Mus musculus aldehyde dehydrogenase family 6, subfamily A1 (Aldh6a1), mRNA [NM_134042]
A_51_P489452	3.8128	Cdo1	NM_033037	Mus musculus cysteine dioxygenase 1, cytosolic (Cdo1), mRNA [NM_033037]
A_51_P156263	3.80893	Zfp511	BC065404	Mus musculus zinc finger protein 511, mRNA (cDNA clone IMAGE:3326991), complete cds. [BC065404]
A_51_P266883	3.80722	Mup4	NM_008648	Mus musculus major urinary protein 4 (Mup4), mRNA [NM_008648]
A_51_P183154	3.80564	Hook1	AK043870	Mus musculus 10 days neonate cortex cDNA, RIKEN full-length enriched library, clone:A830044F05 product:DJ782L23.1 (HOOK1) (FRAGMENT) homolog [Homo sapiens], full insert sequence. [AK043870]
A_52_P697933	3.78243	4933435N07Rik	AK017073	Mus musculus adult male testis cDNA, RIKEN full-length enriched library, clone:4933435N07 product:unclassifiable, full insert sequence. [AK017073]
A_52_P746983	3.77557	Rab13	AK083292	Mus musculus adult male liver tumor cDNA, RIKEN full-length enriched library, clone:C730019P10 product:unclassifiable, full insert sequence. [AK083292]
A_52_P454815	3.77345	Fgf11	BC066859	Mus musculus fibroblast growth factor 11, mRNA (cDNA clone MGC:76712 IMAGE:30101881), complete cds. [BC066859]
A_51_P339540	3.76135	Cdkn1c	NM_009876	Mus musculus cyclin-dependent kinase inhibitor 1C (P57) (Cdkn1c), mRNA [NM_009876]
A_52_P499948	3.75871	1700023L04Rik	XM_485737	PREDICTED: Mus musculus RIKEN cDNA 1700023L04 gene (1700023L04Rik), mRNA [XM_485737]
A_51_P458778	3.75342	Hpgd	NM_008278	Mus musculus hydroxyprostaglandin dehydrogenase 15 (NAD) (Hpgd), mRNA [NM_008278]
A_52_P85334	3.7495	Olfr146	NM_146747	Mus musculus olfactory receptor 146 (Olfr146), mRNA [NM_146747]
A_51_P279232	3.74371	Dennd2d	NM_028110	Mus musculus DENN/MADD domain containing 2D (Dennd2d), mRNA [NM_028110]
A_51_P247928	3.73796	Clmn	AB059646	Mus musculus calmin isoform e mRNA for calmin delta, complete cds. [AB059646]
A_51_P302566	3.72997	Maob	NM_172778	Mus musculus monoamine oxidase B (Maob), mRNA [NM_172778]
A_51_P118300	3.72528	Sncg	NM_011430	Mus musculus synuclein, gamma (Sncg), mRNA [NM_011430]
A_52_P28651	3.72205	Pvrl1	NM_021424	Mus musculus poliovirus receptor-related 1 (Pvrl1), mRNA [NM_021424]
A_51_P398260	3.72177	2900041A09Rik	NM_182839	Mus musculus RIKEN cDNA 2900041A09 gene (2900041A09Rik), mRNA [NM_182839]
A_51_P111655	3.70921	A930034L06Rik	NM_175692	Mus musculus RIKEN cDNA A930034L06 gene (A930034L06Rik), mRNA [NM_175692]
A_52_P331762	3.70704	Lmo1	NM_057173	Mus musculus LIM domain only 1 (Lmo1), mRNA [NM_057173]
A_52_P398925	3.70161	Stfa2l1	NM_173869	Mus musculus stefin A2 like 1 (Stfa2l1), mRNA [NM_173869]
A_51_P517182	3.69819	Hrasls3	AK052657	Mus musculus 0 day neonate kidney cDNA, RIKEN full-length enriched library, clone:D630015C01 product:H-REV 107 PROTEIN homolog [Rattus norvegicus], full insert sequence. [AK052657]
A_51_P423456	3.69798	Sort1	NM_019972	Mus musculus sortilin 1 (Sort1), mRNA [NM_019972]
A_52_P114889	3.69114	Upk3b	NM_175309	Mus musculus uroplakin 3B (Upk3b), mRNA [NM_175309]
A_52_P628369	3.68953	Klhdc7a	NM_173427	Mus musculus kelch domain containing 7A (Klhdc7a), mRNA [NM_173427]
A_52_P212473	3.68825	C730049O14Rik	AK050462	Mus musculus adult male liver tumor cDNA, RIKEN full-length enriched library, clone:C730049O14 product:unclassifiable, full insert sequence [AK050462]
A_51_P452779	3.6869	Pygl	NM_133198	Mus musculus liver glycogen phosphorylase (Pygl), mRNA [NM_133198]
A_52_P520859	3.68445	Flt1	NM_010228	Mus musculus FMS-like tyrosine kinase 1 (Flt1), mRNA [NM_010228]
A_52_P413646	3.68389	Bmp6	NM_007556	Mus musculus bone morphogenetic protein 6 (Bmp6), mRNA [NM_007556]
A_51_P102987	3.68266	Penk1	NM_001002927	Mus musculus preproenkephalin 1 (Penk1), mRNA [NM_001002927]
A_51_P312795	3.67915	Kcnj8	NM_008428	Mus musculus potassium inwardly-rectifying channel, subfamily J, member 8 (Kcnj8), mRNA [NM_008428]
A_52_P409570	3.64689	Pdzd2	NM_001081064	Mus musculus PDZ domain containing 2 (Pdzd2), mRNA [NM_001081064]
A_51_P316553	3.64501	Kdr	NM_010612	Mus musculus kinase insert domain protein receptor (Kdr), mRNA [NM_010612]
A_51_P350048	3.63711	Gstt2	NM_010361	Mus musculus glutathione S-transferase, theta 2 (Gstt2), mRNA [NM_010361]
A_52_P605266	3.58674	Ptprd	NM_001014288	Mus musculus protein tyrosine phosphatase, receptor type, D (Ptprd), transcript variant a, mRNA [NM_001014288]
A_51_P351844	3.58562	Bche	NM_009738	Mus musculus butyrylcholinesterase (Bche), mRNA [NM_009738]
A_52_P980199	3.58148	Cdh10	AK081174	Mus musculus 10 days neonate cerebellum cDNA, RIKEN full-length enriched library, clone:B930096I11 product:unclassifiable, full insert sequence. [AK081174]
A_51_P383001	3.55961	Meox2	NM_008584	Mus musculus mesenchyme homeobox 2 (Meox2), mRNA [NM_008584]
A_51_P475613	3.55552	Fahd2a	NM_029629	Mus musculus fumarylacetoacetate hydrolase domain containing 2A (Fahd2a), mRNA [NM_029629]
A_51_P383524	3.54946	Art3	NM_181728	Mus musculus ADP-ribosyltransferase 3 (Art3), mRNA [NM_181728]
A_52_P260754	3.53797	BC034902	AK040732	Mus musculus adult male aorta and vein cDNA, RIKEN full-length enriched library, clone:A530021K05 product:unclassifiable, full insert sequence [AK040732]
A_51_P276802	3.51547	Akr1c20	NM_054080	Mus musculus aldo-keto reductase family 1, member C20 (Akr1c20), mRNA [NM_054080]
A_51_P179442	3.51316	Adrb3	AF193027	Mus musculus beta-3b adrenergic receptor splice variant (B3bar) mRNA, complete cds. [AF193027]
A_52_P57622	3.50995	8430416H19Rik	NM_198636	Mus musculus RIKEN cDNA 8430416H19 gene (8430416H19Rik), mRNA [NM_198636]
A_51_P461703	3.50754	Mup1	NM_031188	Mus musculus major urinary protein 1 (Mup1), mRNA [NM_031188]
A_51_P514405	3.50658	Slc2a5	NM_019741	Mus musculus solute carrier family 2 (facilitated glucose transporter), member 5 (Slc2a5), mRNA [NM_019741]
A_51_P519354	3.50536	Ryr3	AK082701	Mus musculus 0 day neonate cerebellum cDNA, RIKEN full-length enriched library, clone:C230090H21 product:hypothetical protein, full insert sequence. [AK082701]
A_51_P322640	3.50298	Ccl24	NM_019577	Mus musculus chemokine (C-C motif) ligand 24 (Ccl24), mRNA [NM_019577]
A_51_P493486	3.4975	Mllt4	AK048179	Mus musculus 16 days embryo head cDNA, RIKEN full-length enriched library, clone:C130039A08 product:unclassifiable, full insert sequence. [AK048179]
A_51_P130803	3.49674	2310002J21Rik	BC037041	Mus musculus RIKEN cDNA 2310002J21 gene, mRNA (cDNA clone IMAGE:4512134), partial cds [BC037041]
A_52_P659779	3.49339	Olfr172	NM_147001	Mus musculus olfactory receptor 172 (Olfr172), mRNA [NM_147001]
A_52_P205695	3.48711	Mettl7a	NM_027334	Mus musculus methyltransferase like 7A (Mettl7a), mRNA [NM_027334]
A_51_P215438	3.48706	Prodh	NM_011172	Mus musculus proline dehydrogenase (Prodh), mRNA [NM_011172]
A_52_P1156549	3.48497	AK084615	AK084615	Mus musculus 13 days embryo heart cDNA, RIKEN full-length enriched library, clone:D330021L12 product:unclassifiable, full insert sequence. [AK084615]
A_52_P674808	3.48039	Chrdl1		chordin-like 1 [Source:MarkerSymbol;Acc:MGI:1933172] [ENSMUST00000074660]
A_52_P191412	3.47947	Negr1	NM_001039094	Mus musculus neuronal growth regulator 1 (Negr1), transcript variant 1, mRNA [NM_001039094]
A_52_P642039	3.46613	1110039F03Rik	AK032413	Mus musculus adult male olfactory brain cDNA, RIKEN full-length enriched library, clone:6430540A02 product:unclassifiable, full insert sequence [AK032413]
A_52_P158431	3.46408	Tshz2	NM_080455	Mus musculus teashirt zinc finger family member 2 (Tshz2), mRNA [NM_080455]
A_51_P158638	3.46238	ENSMUST00000025033		RIKEN cDNA 0610031G08 gene [Source:MarkerSymbol;Acc:MGI:1922643] [ENSMUST00000025033]
A_51_P433843	3.4588	3110004L20Rik	NM_001033167	Mus musculus RIKEN cDNA 3110004L20 gene (3110004L20Rik), mRNA [NM_001033167]
A_51_P508580	3.45059	Tcf15	NM_009328	Mus musculus transcription factor 15 (Tcf15), mRNA [NM_009328]
A_52_P218379	3.44857	Kif26a	XM_138275	PREDICTED: Mus musculus similar to CG14535-PA (LOC668303), mRNA [XM_138275]
A_51_P226269	3.43159	1190002H23Rik	NM_025427	Mus musculus RIKEN cDNA 1190002H23 gene (1190002H23Rik), mRNA [NM_025427]
A_51_P206153	3.42703	Ptprd	D13903	Mus musculus mRNA for MPTPdelta, complete cds. [D13903]
A_51_P356283	3.4239	Fbxo31	NM_133765	Mus musculus F-box protein 31 (Fbxo31), mRNA [NM_133765]
A_51_P325217	3.41622	9630055L06Rik	AK036311	Mus musculus 16 days neonate cerebellum cDNA, RIKEN full-length enriched library, clone:9630055L06 product:unclassifiable, full insert sequence. [AK036311]
A_52_P225898	3.41067	Kcnj8	NM_008428	Mus musculus potassium inwardly-rectifying channel, subfamily J, member 8 (Kcnj8), mRNA [NM_008428]
A_51_P135012	3.40903	Rhpn2	NM_027897	Mus musculus rhophilin, Rho GTPase binding protein 2 (Rhpn2), mRNA [NM_027897]
A_52_P1180378	3.40809	AK037503	AK037503	Mus musculus 16 days neonate thymus cDNA, RIKEN full-length enriched library, clone:A130022E21 product:unclassifiable, full insert sequence [AK037503]
A_52_P561416	3.40186	6430573F11Rik	NM_176952	Mus musculus RIKEN cDNA 6430573F11 gene (6430573F11Rik), mRNA [NM_176952]
A_51_P384936	3.39235	Ddo	NM_027442	Mus musculus D-aspartate oxidase (Ddo), mRNA [NM_027442]
A_51_P499400	3.38779	ENSMUST00000095105		RIKEN cDNA 1700055D18 gene [Source:MarkerSymbol;Acc:MGI:1920655] [ENSMUST00000095105]
A_52_P113085	3.38149	Pdzd2	AK021207	Mus musculus ES cells cDNA, RIKEN full-length enriched library, clone:C330017M16 product:unclassifiable, full insert sequence. [AK021207]
A_51_P137640	3.37643	2610005D18Rik	AK011315	Mus musculus 10 days embryo whole body cDNA, RIKEN full-length enriched library, clone:2610005D18 product:RIKEN cDNA 2610005D18 gene, full insert sequence. [AK011315]
A_51_P286671	3.36939	Tsga10		testis specific 10 [Source:MarkerSymbol;Acc:MGI:2685063] [ENSMUST00000088072]
A_52_P668984	3.3692	4930420K17Rik	NM_001081029	Mus musculus RIKEN cDNA 4930420K17 gene (4930420K17Rik), mRNA [NM_001081029]
A_52_P160279	3.36774	4631427C17Rik	NM_021414	Mus musculus RIKEN cDNA 4631427C17 gene (4631427C17Rik), mRNA [NM_021414]
A_51_P488211	3.36505	Atp10d	NM_153389	Mus musculus ATPase, Class V, type 10D (Atp10d), mRNA [NM_153389]
A_51_P497985	3.3595	C2	NM_013484	Mus musculus complement component 2 (within H-2S) (C2), mRNA [NM_013484]
A_51_P172475	3.35516	S100a1	NM_011309	Mus musculus S100 calcium binding protein A1 (S100a1), mRNA [NM_011309]
A_51_P498267	3.34599	Ankrd29		ankyrin repeat domain 29 [Source:MarkerSymbol;Acc:MGI:2687055] [ENSMUST00000080906]
A_52_P215176	3.34111	Opn3	NM_010098	Mus musculus opsin (encephalopsin) (Opn3), mRNA [NM_010098]
A_51_P386539	3.3411	Rnf125	NM_026301	Mus musculus ring finger protein 125 (Rnf125), mRNA [NM_026301]
A_52_P353478	3.33782	Scn7a	NM_009135	Mus musculus sodium channel, voltage-gated, type VII, alpha (Scn7a), mRNA [NM_009135]
A_52_P85152	3.33402	Acad11	NM_175324	Mus musculus acyl-Coenzyme A dehydrogenase family, member 11 (Acad11), mRNA [NM_175324]
A_51_P281333	3.32632	St3gal6	NM_018784	Mus musculus ST3 beta-galactoside alpha-2,3-sialyltransferase 6 (St3gal6), mRNA [NM_018784]
A_52_P401386	3.32241	Jup	NM_010593	Mus musculus junction plakoglobin (Jup), mRNA [NM_010593]
A_51_P362483	3.3221	Slc43a1	NM_001081349	Mus musculus solute carrier family 43, member 1 (Slc43a1), transcript variant 1, mRNA [NM_001081349]
A_52_P118706	3.32166	9630013D21Rik	AK080944	Mus musculus 4 days neonate male adipose cDNA, RIKEN full-length enriched library, clone:B430215G09 product:unclassifiable, full insert sequence [AK080944]
A_52_P541095	3.32062	Unc5a	NM_153131	Mus musculus unc-5 homolog A (C. elegans) (Unc5a), mRNA [NM_153131]
A_52_P70888	3.31194	A930034L06Rik	NM_175692	Mus musculus RIKEN cDNA A930034L06 gene (A930034L06Rik), mRNA [NM_175692]
A_52_P253179	3.30937	Igfbp3	NM_008343	Mus musculus insulin-like growth factor binding protein 3 (Igfbp3), mRNA [NM_008343]
A_51_P334942	3.30422	Aldh1a1	NM_013467	Mus musculus aldehyde dehydrogenase family 1, subfamily A1 (Aldh1a1), mRNA [NM_013467]
A_52_P239536	3.30158	Ppp1r9a	NM_181595	Mus musculus protein phosphatase 1, regulatory (inhibitor) subunit 9A (Ppp1r9a), mRNA [NM_181595]
A_52_P350554	3.29369	Kcnb1	NM_008420	Mus musculus potassium voltage gated channel, Shab-related subfamily, member 1 (Kcnb1), mRNA [NM_008420]
A_52_P116264	3.29039	Adhfe1	NM_175236	Mus musculus alcohol dehydrogenase, iron containing, 1 (Adhfe1), mRNA [NM_175236]
A_51_P512541	3.28984	2310014G06Rik	NM_001082975	Mus musculus RIKEN cDNA 2310014G06 gene (2310014G06Rik), mRNA [NM_001082975]
A_51_P435366	3.28788	Lipe	NM_010719	Mus musculus lipase, hormone sensitive (Lipe), transcript variant 1, mRNA [NM_010719]
A_51_P516012	3.27824	Ntrk2	NM_008745	Mus musculus neurotrophic tyrosine kinase, receptor, type 2 (Ntrk2), transcript variant 2, mRNA [NM_008745]
A_51_P112817	3.27685	Cyp27a1	NM_024264	Mus musculus cytochrome P450, family 27, subfamily a, polypeptide 1 (Cyp27a1), mRNA [NM_024264]
A_51_P458781	3.27295	Hpgd	NM_008278	Mus musculus hydroxyprostaglandin dehydrogenase 15 (NAD) (Hpgd), mRNA [NM_008278]
A_52_P467780	3.27093	4930474G06Rik	AK076658	Mus musculus adult male testis cDNA, RIKEN full-length enriched library, clone:4930404F19 product:unclassifiable, full insert sequence. [AK076658]
A_52_P656714	3.26643	Map3k5	NM_008580	Mus musculus mitogen activated protein kinase kinase kinase 5 (Map3k5), mRNA [NM_008580]
A_51_P211980	3.2642	Rgs3	NM_019492	Mus musculus regulator of G-protein signaling 3 (Rgs3), transcript variant 1, mRNA [NM_019492]
A_52_P331227	3.26154	TC1633516		Q6IE84_MOUSE (Q6IE84) Jade1S protein, partial (11%) [TC1633516]
A_51_P466633	3.25414	Slc16a7	NM_011391	Mus musculus solute carrier family 16 (monocarboxylic acid transporters), member 7 (Slc16a7), mRNA [NM_011391]
A_51_P168894	3.24984	Tmem16a	NM_178642	Mus musculus transmembrane protein 16A (Tmem16a), mRNA [NM_178642]
A_52_P276222	3.24962	Polr2f	NM_027231	Mus musculus polymerase (RNA) II (DNA directed) polypeptide F (Polr2f), mRNA [NM_027231]
A_52_P681391	3.24763	G0s2	NM_008059	Mus musculus G0/G1 switch gene 2 (G0s2), mRNA [NM_008059]
A_52_P552841	3.24525	1700102J08Rik	AK020344	Mus musculus adult male epididymis cDNA, RIKEN full-length enriched library, clone:9230113C19 product:unclassifiable, full insert sequence. [AK020344]
A_51_P405606	3.24384	Ndrg1	NM_008681	Mus musculus N-myc downstream regulated gene 1 (Ndrg1), mRNA [NM_008681]
A_52_P458177	3.24378	Ubie	AB099518	Mus musculus UbiE2 mRNA for UbiE2, complete cds. [AB099518]
A_51_P430082	3.24183	Tst	NM_009437	Mus musculus thiosulfate sulfurtransferase, mitochondrial (Tst), mRNA [NM_009437]
A_52_P642662	3.24129	Efhd1	NM_028889	Mus musculus EF hand domain containing 1 (Efhd1), mRNA [NM_028889]
A_51_P438002	3.24074	Nmb	NM_026523	Mus musculus neuromedin B (Nmb), mRNA [NM_026523]
A_51_P126198	3.2327	Dapk2	NM_010019	Mus musculus death-associated kinase 2 (Dapk2), mRNA [NM_010019]
A_52_P227937	3.2282	0610010O12Rik	BC028765	Mus musculus RIKEN cDNA 0610010O12 gene, mRNA (cDNA clone MGC:41247 IMAGE:1195860), complete cds. [BC028765]
A_51_P428555	3.22699	Adh1	NM_007409	Mus musculus alcohol dehydrogenase 1 (class I) (Adh1), mRNA [NM_007409]
A_51_P252545	3.22131	Ppm1m	NM_026447	Mus musculus protein phosphatase 1M (Ppm1m), transcript variant 1, mRNA [NM_026447]
A_52_P450183	3.21222	Rapgef5	AK122234	Mus musculus mRNA for mKIAA0277 protein [AK122234]
A_52_P75220	3.20915	3110021N24Rik	AK011275	Mus musculus 10 days embryo whole body cDNA, RIKEN full-length enriched library, clone:2610002D03 product:hypothetical protein, full insert sequence. [AK011275]
A_51_P492339	3.20915	Cyp2b13	NM_007813	Mus musculus cytochrome P450, family 2, subfamily b, polypeptide 13 (Cyp2b13), mRNA [NM_007813]
A_51_P424959	3.20624	Bcl6b	NM_007528	Mus musculus B-cell CLL/lymphoma 6, member B (Bcl6b), mRNA [NM_007528]
A_51_P290526	3.20242	Abcd2	NM_011994	Mus musculus ATP-binding cassette, sub-family D (ALD), member 2 (Abcd2), mRNA [NM_011994]
A_51_P189746	3.20122	Pim3	NM_145478	Mus musculus proviral integration site 3 (Pim3), mRNA [NM_145478]
A_51_P176352	3.19962	Ndrg2	NM_013864	Mus musculus N-myc downstream regulated gene 2 (Ndrg2), mRNA [NM_013864]
A_51_P517145	3.19476	Sort1	NM_019972	Mus musculus sortilin 1 (Sort1), mRNA [NM_019972]
A_51_P480328	3.19252	Eltd1	NM_133222	Mus musculus EGF, latrophilin seven transmembrane domain containing 1 (Eltd1), mRNA [NM_133222]
A_52_P606944	3.18707	C530042K13Rik	AK043921	Mus musculus 10 days neonate cortex cDNA, RIKEN full-length enriched library, clone:A830052E13 product:unclassifiable, full insert sequence. [AK043921]
A_51_P268439	3.17899	Mcam	NM_023061	Mus musculus melanoma cell adhesion molecule (Mcam), mRNA [NM_023061]
A_52_P250644	3.17703	NAP025521-001
A_51_P327874	3.1682	Pthr1	NM_011199	Mus musculus parathyroid hormone receptor 1 (Pthr1), transcript variant 1, mRNA [NM_011199]
A_52_P513041	3.16796	Fry	AK220506	Mus musculus mRNA for mKIAA4143 protein. [AK220506]
A_52_P668686	3.15704	A530088E08Rik	AK041179	Mus musculus adult male aorta and vein cDNA, RIKEN full-length enriched library, clone:A530088E08 product:unclassifiable, full insert sequence. [AK041179]
A_51_P234692	3.15339	2310043N10Rik	AK028745	Mus musculus 10 days neonate skin cDNA, RIKEN full-length enriched library, clone:4732452C17 product:unclassifiable, full insert sequence [AK028745]
A_52_P423188	3.15174	Mlxipl	AF245475	Mus musculus Mlx interactor zeta (Mio) mRNA, complete cds, alternatively spliced [AF245475]
A_51_P407028	3.14968	Car4	NM_007607	Mus musculus carbonic anhydrase 4 (Car4), mRNA [NM_007607]
A_51_P505738	3.14966	BC054059	NM_145635	Mus musculus cDNA sequence BC054059 (BC054059), mRNA [NM_145635]
A_52_P440885	3.14929	9630023C09Rik	AK084616	Mus musculus 13 days embryo heart cDNA, RIKEN full-length enriched library, clone:D330021P03 product:unclassifiable, full insert sequence [AK084616]
A_52_P49391	3.14158	Cyp2d22	AK090296	Mus musculus 21 days neonate cerebellum cDNA, RIKEN full-length enriched library, clone:G630039L19 product:cytochrome P450, 2d22, full insert sequence [AK090296]
A_51_P472274	3.13806	Sox18	NM_009236	Mus musculus SRY-box containing gene 18 (Sox18), mRNA [NM_009236]
A_51_P143431	3.13149	Pde3b	NM_011055	Mus musculus phosphodiesterase 3B, cGMP-inhibited (Pde3b), mRNA [NM_011055]
A_52_P380263	3.12914	Podxl	NM_013723	Mus musculus podocalyxin-like (Podxl), mRNA [NM_013723]
A_52_P577662	3.12636	Ednrb	NM_007904	Mus musculus endothelin receptor type B (Ednrb), mRNA [NM_007904]
A_52_P171166	3.12409	BC048679	NM_183143	Mus musculus cDNA sequence BC048679 (BC048679), mRNA [NM_183143]
A_51_P435363	3.11937	Lipe	NM_010719	Mus musculus lipase, hormone sensitive (Lipe), transcript variant 1, mRNA [NM_010719]
A_52_P113700	3.11417	Sfxn1	NM_027324	Mus musculus sideroflexin 1 (Sfxn1), mRNA [NM_027324]
A_51_P171883	3.11116	Palmd	NM_023245	Mus musculus palmdelphin (Palmd), mRNA [NM_023245]
A_51_P156218	3.10608	Gpr116	NM_001081178	Mus musculus G protein-coupled receptor 116 (Gpr116), mRNA [NM_001081178]
A_51_P321126	3.10542	Fasn	NM_007988	Mus musculus fatty acid synthase (Fasn), mRNA [NM_007988]
A_51_P301483	3.10148	Hoxc8	NM_010466	Mus musculus homeo box C8 (Hoxc8), mRNA [NM_010466]
A_51_P462569	3.09749	Ccdc105	XM_147407	PREDICTED: Mus musculus RIKEN cDNA 4931413A09 gene (4931413A09Rik), mRNA [XM_147407]
A_51_P178735	3.09595	Hibch	NM_146108	Mus musculus 3-hydroxyisobutyryl-Coenzyme A hydrolase (Hibch), mRNA [NM_146108]
A_52_P460767	3.09518	Fmo5	NM_010232	Mus musculus flavin containing monooxygenase 5 (Fmo5), mRNA [NM_010232]
A_51_P196774	3.09407	Prr16	NM_001081224	Mus musculus proline rich 16 (Prr16), mRNA [NM_001081224]
A_51_P155638	3.08946	Cd300lg	NM_027987	Mus musculus CD300 antigen like family member G (Cd300lg), mRNA [NM_027987]
A_51_P510764	3.08893	A530016O06Rik	AK040702	Mus musculus adult male aorta and vein cDNA, RIKEN full-length enriched library, clone:A530016O06 product:hypothetical SUR2-type hydroxylase/desaturase catalytic domain containing protein, full insert sequence. [AK040702]
A_52_P673458	3.08867	Wt1	NM_144783	Mus musculus Wilms tumor homolog (Wt1), mRNA [NM_144783]
A_51_P511418	3.08517	1700108M19Rik	NM_027699	Mus musculus RIKEN cDNA 1700108M19 gene (1700108M19Rik), mRNA [NM_027699]
A_52_P34378	3.08107	Ric3	NM_001038624	Mus musculus resistance to inhibitors of cholinesterase 3 homolog (C. elegans) (Ric3), transcript variant 1, mRNA [NM_001038624]
A_51_P477250	3.07671	Abca6	AK040652	Mus musculus adult male aorta and vein cDNA, RIKEN full-length enriched library, clone:A530006M05 product:hypothetical protein, full insert sequence. [AK040652]
A_52_P401535	3.07321	Cd209d	NM_130904	Mus musculus CD209d antigen (Cd209d), mRNA [NM_130904]
A_51_P253883	3.07153	D12Ertd553e	NM_029758	Mus musculus DNA segment, Chr 12, ERATO Doi 553, expressed (D12Ertd553e), mRNA [NM_029758]
A_52_P360070	3.06942	C730045O03Rik	AK050409	Mus musculus adult male liver tumor cDNA, RIKEN full-length enriched library, clone:C730045O03 product:unclassifiable, full insert sequence [AK050409]
A_51_P462533	3.06866	AK028004	AK028004	Mus musculus 18-day embryo whole body cDNA, RIKEN full-length enriched library, clone:1190003C09 product:unclassifiable, full insert sequence. [AK028004]
A_51_P271832	3.06717	2210009G21Rik	NM_028834	Mus musculus RIKEN cDNA 2210009G21 gene (2210009G21Rik), transcript variant 1, mRNA [NM_028834]
A_52_P282171	3.06385	Sox6	NM_011445	Mus musculus SRY-box containing gene 6 (Sox6), transcript variant 1, mRNA [NM_011445]
A_51_P315849	3.06351	NAP098046-001
A_52_P41292	3.06147	LOC675366	XM_981337	PREDICTED: Mus musculus similar to mitogen activated protein kinase kinase kinase 5 (LOC675366), mRNA [XM_981337]
A_51_P495780	3.05951	S3-12	NM_020568	Mus musculus plasma membrane associated protein, S3-12 (S3-12), mRNA [NM_020568]
A_51_P463562	3.05388	Gbp4	NM_008620	Mus musculus guanylate nucleotide binding protein 4 (Gbp4), mRNA [NM_008620]
A_51_P118704	3.05126	Cyp4b1	NM_007823	Mus musculus cytochrome P450, family 4, subfamily b, polypeptide 1 (Cyp4b1), mRNA [NM_007823]
A_52_P599478	3.05015	EG544888	XM_619025	PREDICTED: Mus musculus hypothetical LOC544888 (LOC544888), mRNA [XM_619025]
A_52_P273120	3.04823	Myl1	AK009938	Mus musculus adult male tongue cDNA, RIKEN full-length enriched library, clone:2310051N24 product:myosin light chain, alkali, fast skeletal muscle, full insert sequence. [AK009938]
A_51_P489488	3.04805	Pde4dip	NM_001039376	Mus musculus phosphodiesterase 4D interacting protein (myomegalin) (Pde4dip), transcript variant 1, mRNA [NM_001039376]
A_51_P416858	3.04614	Myl1	NM_021285	Mus musculus myosin, light polypeptide 1 (Myl1), mRNA [NM_021285]
A_51_P155234	3.0444	Bnip3	NM_009760	Mus musculus BCL2/adenovirus E1B interacting protein 1, NIP3 (Bnip3), mRNA [NM_009760]
A_51_P259603	3.04438	Adcyap1r1	NM_007407	Mus musculus adenylate cyclase activating polypeptide 1 receptor 1 (Adcyap1r1), transcript variant 1, mRNA [NM_007407]
A_51_P104197	3.04379	BC038479	NM_153803	Mus musculus cDNA sequence BC038479 (BC038479), mRNA [NM_153803]
A_51_P276063	3.03971	Phyh	NM_010726	Mus musculus phytanoyl-CoA hydroxylase (Phyh), mRNA [NM_010726]
A_52_P678393	3.03819	Slc22a14	NM_001037749	Mus musculus solute carrier family 22 (organic cation transporter), member 14 (Slc22a14), mRNA [NM_001037749]
A_51_P461665	3.03545	Cxcl9	NM_008599	Mus musculus chemokine (C-X-C motif) ligand 9 (Cxcl9), mRNA [NM_008599]
A_52_P211197	3.03208	2410066E13Rik	NM_026629	Mus musculus RIKEN cDNA 2410066E13 gene (2410066E13Rik), mRNA [NM_026629]
A_51_P218910	3.03059	2410066E13Rik	BC042507	Mus musculus RIKEN cDNA 2410066E13 gene, mRNA (cDNA clone MGC:30499 IMAGE:4235651), complete cds. [BC042507]
A_52_P532559	3.03051	Thrb	AK158826	Mus musculus visual cortex cDNA, RIKEN full-length enriched library, clone:K430339A03 product:thyroid hormone receptor beta, full insert sequence. [AK158826]
A_52_P453469	3.02569	4933404M19Rik	NM_001045516	Mus musculus RIKEN cDNA 4933404M19 gene (4933404M19Rik), mRNA [NM_001045516]
A_51_P157953	3.02271	6330407J23Rik	NM_026138	Mus musculus RIKEN cDNA 6330407J23 gene (6330407J23Rik), mRNA [NM_026138]
A_51_P309874	3.02174	BB531021	BB531021	BB531021 RIKEN full-length enriched, 0 day neonate lung Mus musculus cDNA clone E030012P20 3'. [BB531021]
A_51_P405956	3.02026	ENSMUST00000057926		cyclin L2 [Source:MarkerSymbol;Acc:MGI:1927119] [ENSMUST00000057926]
A_51_P138596	3.01828	AK046810	AK046810	Mus musculus 10 days neonate medulla oblongata cDNA, RIKEN full-length enriched library, clone:B830012M14 product:unclassifiable, full insert sequence. [AK046810]
A_51_P283384	3.01827	V1rf3	NM_134200	Mus musculus vomeronasal 1 receptor, F3 (V1rf3), mRNA [NM_134200]
A_51_P338083	3.01616	NP431243		GB|AY073383.1|AAL61046.1 olfactory receptor MOR258-4P [Mus musculus] [NP431243]
A_51_P418526	3.01574	Sfxn1	NM_027324	Mus musculus sideroflexin 1 (Sfxn1), mRNA [NM_027324]
A_51_P346015	3.01336	A530099J19Rik	NM_175688	Mus musculus RIKEN cDNA A530099J19 gene (A530099J19Rik), mRNA [NM_175688]
A_52_P376169	3.01127	Lypd6	NM_177139	Mus musculus LY6/PLAUR domain containing 6 (Lypd6), mRNA [NM_177139]
A_51_P402913	3.00692	BC038822	NM_172293	Mus musculus cDNA sequence BC038822 (BC038822), mRNA [NM_172293]
A_52_P37826	3.00315	Dapk1	NM_029653	Mus musculus death associated protein kinase 1 (Dapk1), transcript variant 1, mRNA [NM_029653]
A_52_P375831	3.00051	6720408I04Rik	AK020107	Mus musculus 12 days embryo male wolffian duct includes surrounding region cDNA, RIKEN full-length enriched library, clone:6720408I04 product:hypothetical protein, full insert sequence. [AK020107]
A_51_P254805	2.99842	Kif4	NM_008446	Mus musculus kinesin family member 4 (Kif4), mRNA [NM_008446]
A_52_P676469	2.99786	Tfdp2	NM_178667	Mus musculus transcription factor Dp 2 (Tfdp2), mRNA [NM_178667]
A_51_P219662	2.99432	1300014I06Rik	NM_025831	Mus musculus RIKEN cDNA 1300014I06 gene (1300014I06Rik), mRNA [NM_025831]
A_51_P476018	2.99219	Sox7	NM_011446	Mus musculus SRY-box containing gene 7 (Sox7), mRNA [NM_011446]
A_51_P474169	2.99131	5430407P10Rik	NM_144883	Mus musculus RIKEN cDNA 5430407P10 gene (5430407P10Rik), mRNA [NM_144883]
A_52_P64687	2.9848	Camk2n1	NM_025451	Mus musculus calcium/calmodulin-dependent protein kinase II inhibitor 1 (Camk2n1), mRNA [NM_025451]
A_51_P151862	2.98088	Lims2	NM_144862	Mus musculus LIM and senescent cell antigen like domains 2 (Lims2), mRNA [NM_144862]
A_51_P508899	2.97989	Rbp7	NM_022020	Mus musculus retinol binding protein 7, cellular (Rbp7), mRNA [NM_022020]
A_52_P541118	2.97815	A930034L06Rik	NM_175692	Mus musculus RIKEN cDNA A930034L06 gene (A930034L06Rik), mRNA [NM_175692]
A_51_P196663	2.97401	Cd209f	XM_898059	PREDICTED: Mus musculus RIKEN cDNA 1810029C22 gene, transcript variant 2 (1810029C22Rik), mRNA [XM_898059]
A_51_P473979	2.97077	TC1646500		Q3UYH0_MOUSE (Q3UYH0) Adult male medulla oblongata cDNA, RIKEN full-length enriched library, clone:6330525A16 product:nuclear receptor interacting protein 2, full insert sequence, partial (31%) [TC1646500]
A_52_P629895	2.96131	Adh1	NM_007409	Mus musculus alcohol dehydrogenase 1 (class I) (Adh1), mRNA [NM_007409]
A_52_P1099463	2.95822	6230414M07Rik	AK018087	Mus musculus 11 days embryo head cDNA, RIKEN full-length enriched library, clone:6230414M07 product:unclassifiable, full insert sequence. [AK018087]
A_52_P290434	2.95469	Fbxl7	BC050864	Mus musculus cDNA clone IMAGE:6331977. [BC050864]
A_52_P89125	2.95117	AK042446	AK042446	Mus musculus 3 days neonate thymus cDNA, RIKEN full-length enriched library, clone:A630092F23 product:hypothetical protein, full insert sequence. [AK042446]
A_52_P572808	2.94159	A230097K15Rik	NM_172715	Mus musculus RIKEN cDNA A230097K15 gene (A230097K15Rik), transcript variant 1, mRNA [NM_172715]
A_51_P493234	2.93785	Cp	NM_007752	Mus musculus ceruloplasmin (Cp), transcript variant 2, mRNA [NM_007752]
A_52_P72297	2.93638	Ace	NM_207624	Mus musculus angiotensin I converting enzyme (peptidyl-dipeptidase A) 1 (Ace), transcript variant 1, mRNA [NM_207624]
A_51_P493886	2.93514	Gpt2	NM_173866	Mus musculus glutamic pyruvate transaminase (alanine aminotransferase) 2 (Gpt2), mRNA [NM_173866]
A_51_P268193	2.93496	Slc7a10	NM_017394	Mus musculus solute carrier family 7 (cationic amino acid transporter, y+ system), member 10 (Slc7a10), mRNA [NM_017394]
A_51_P191274	2.93366	A_51_P191274
A_51_P378051	2.92981	Aoc3	NM_009675	Mus musculus amine oxidase, copper containing 3 (Aoc3), mRNA [NM_009675]
A_51_P394515	2.92258	Tkt	NM_009388	Mus musculus transketolase (Tkt), mRNA [NM_009388]
A_52_P653565	2.92226	ENSMUST00000103507		Immunoglobulin heavy chain V gene segment [Source:IMGT/GENE_DB;Acc:IGHV1S99] [ENSMUST00000103507]
A_51_P299339	2.9186	Klf15	NM_023184	Mus musculus Kruppel-like factor 15 (Klf15), mRNA [NM_023184]
A_52_P557113	2.91683	Utrn	AK041435	Mus musculus 3 days neonate thymus cDNA, RIKEN full-length enriched library, clone:A630008N19 product:utrophin, full insert sequence. [AK041435]
A_52_P336904	2.91575	Pclo	NM_011995	Mus musculus piccolo (presynaptic cytomatrix protein) (Pclo), mRNA [NM_011995]
A_52_P411667	2.9142	NAP028770-1
A_51_P193379	2.91148	Mtmr7	NM_001040699	Mus musculus myotubularin related protein 7 (Mtmr7), mRNA [NM_001040699]
A_51_P164530	2.90844	Fhit	NM_010210	Mus musculus fragile histidine triad gene (Fhit), mRNA [NM_010210]
A_52_P374983	2.90607	9330175E14Rik	AK080381	Mus musculus 3 days neonate thymus cDNA, RIKEN full-length enriched library, clone:A630085K21 product:hypothetical protein, full insert sequence. [AK080381]
A_52_P568257	2.9054	Sort1	NM_019972	Mus musculus sortilin 1 (Sort1), mRNA [NM_019972]
A_51_P315618	2.9039	AK031381	AK031381	Mus musculus 13 days embryo male testis cDNA, RIKEN full-length enriched library, clone:6030418J17 product:predicted gene Ym24d07, full insert sequence. [AK031381]
A_52_P147816	2.89984	Morc4	NM_029413	Mus musculus microrchidia 4 (Morc4), mRNA [NM_029413]
A_52_P372784	2.89624	6330437I11Rik	AK018205	Mus musculus adult male medulla oblongata cDNA, RIKEN full-length enriched library, clone:6330437I11 product:unclassifiable, full insert sequence [AK018205]
A_52_P550069	2.89536	Ivd	NM_019826	Mus musculus isovaleryl coenzyme A dehydrogenase (Ivd), mRNA [NM_019826]
A_52_P343627	2.89474	Rbp7	NM_022020	Mus musculus retinol binding protein 7, cellular (Rbp7), mRNA [NM_022020]
A_51_P208083	2.88842	S100b	NM_009115	Mus musculus S100 protein, beta polypeptide, neural (S100b), mRNA [NM_009115]
A_51_P386270	2.88375	9030605E09Rik	NM_201360	Mus musculus RIKEN cDNA 9030605E09 gene (9030605E09Rik), mRNA [NM_201360]
A_51_P397537	2.88205	1700012H05Rik	NM_029660	Mus musculus RIKEN cDNA 1700012H05 gene (1700012H05Rik), mRNA [NM_029660]
A_51_P185247	2.88197	Gdf10	NM_145741	Mus musculus growth differentiation factor 10 (Gdf10), mRNA [NM_145741]
A_51_P430055	2.88137	Tspan7	NM_019634	Mus musculus tetraspanin 7 (Tspan7), mRNA [NM_019634]
A_51_P490456	2.87976	Cidec	NM_178373	Mus musculus cell death-inducing DFFA-like effector c (Cidec), mRNA [NM_178373]
A_51_P239386	2.87756	Ppp1r14c	NM_133485	Mus musculus protein phosphatase 1, regulatory (inhibitor) subunit 14c (Ppp1r14c), mRNA [NM_133485]
A_51_P193490	2.87713	Fbxo21	NM_145564	Mus musculus F-box protein 21 (Fbxo21), mRNA [NM_145564]
A_52_P86704	2.86967	Arl4a	NM_007487	Mus musculus ADP-ribosylation factor-like 4A (Arl4a), transcript variant 1, mRNA [NM_007487]
A_52_P84315	2.86761	Chd7	NM_001081417	Mus musculus chromodomain helicase DNA binding protein 7 (Chd7), mRNA [NM_001081417]
A_52_P13802	2.86473	Cbfa2t3h	NM_009824	Mus musculus core-binding factor, runt domain, alpha subunit 2, translocated to, 3 homolog (human) (Cbfa2t3h), mRNA [NM_009824]
A_51_P268496	2.85878	Slc24a3	NM_053195	Mus musculus solute carrier family 24 (sodium/potassium/calcium exchanger), member 3 (Slc24a3), mRNA [NM_053195]
A_52_P227267	2.85875	Atp1a2	NM_178405	Mus musculus ATPase, Na+/K+ transporting, alpha 2 polypeptide (Atp1a2), mRNA [NM_178405]
A_51_P179664	2.85705	Gstt1	NM_008185	Mus musculus glutathione S-transferase, theta 1 (Gstt1), mRNA [NM_008185]
A_51_P318618	2.85674	Anks4b	NM_028085	Mus musculus ankyrin repeat and sterile alpha motif domain containing 4B (Anks4b), mRNA [NM_028085]
A_51_P379083	2.85598	Adam24	NM_010086	Mus musculus a disintegrin and metallopeptidase domain 24 (testase 1) (Adam24), mRNA [NM_010086]
A_52_P137778	2.8553	A530053G22Rik	BC051224	Mus musculus RIKEN cDNA A530053G22 gene, mRNA (cDNA clone MGC:63091 IMAGE:3373233), complete cds. [BC051224]
A_52_P427818	2.85389	EG232875	BC094341	Mus musculus similar to hypothetical protein FLJ12895, mRNA (cDNA clone IMAGE:5687425), complete cds [BC094341]
A_51_P244497	2.85308	Plin	NM_175640	Mus musculus perilipin (Plin), mRNA [NM_175640]
A_51_P143893	2.85082	Steap4	NM_054098	Mus musculus STEAP family member 4 (Steap4), mRNA [NM_054098]
A_51_P376912	2.84774	A230106D06Rik	AK220535	Mus musculus mRNA for mKIAA4190 protein [AK220535]
A_52_P244506	2.84604	Evc	AK039759	Mus musculus adult male spinal cord cDNA, RIKEN full-length enriched library, clone:A330104K03 product:Ellis van Creveld gene homolog (human), full insert sequence. [AK039759]
A_52_P169181	2.84437	Auts2	NM_177047	Mus musculus autism susceptibility candidate 2 (Auts2), mRNA [NM_177047]
A_51_P138939	2.84297	Robo4	NM_028783	Mus musculus roundabout homolog 4 (Drosophila) (Robo4), mRNA [NM_028783]
A_52_P415215	2.84101	Gstm1	NM_010358	Mus musculus glutathione S-transferase, mu 1 (Gstm1), mRNA [NM_010358]
A_51_P418259	2.84022	Pccb	NM_025835	Mus musculus propionyl Coenzyme A carboxylase, beta polypeptide (Pccb), mRNA [NM_025835]
A_51_P180905	2.83389	Pcsk6	XM_355911	PREDICTED: Mus musculus proprotein convertase subtilisin [XM_355911]
A_51_P370140	2.83236	Olfr142	NM_146984	Mus musculus olfactory receptor 142 (Olfr142), mRNA [NM_146984]
A_52_P403405	2.82695	Aqp7	NM_007473	Mus musculus aquaporin 7 (Aqp7), mRNA [NM_007473]
A_51_P478930	2.82431	AK080016	AK080016	Mus musculus adult male aorta and vein cDNA, RIKEN full-length enriched library, clone:A530047H08 product:unclassifiable, full insert sequence. [AK080016]
A_51_P472466	2.82366	9530009G21Rik	AK079179	Mus musculus adult male urinary bladder cDNA, RIKEN full-length enriched library, clone:9530009G21 product:hypothetical protein, full insert sequence. [AK079179]
A_52_P115292	2.8202	Acot6	BC002159	Mus musculus acyl-CoA thioesterase 6, mRNA (cDNA clone IMAGE:3485583), complete cds. [BC002159]
A_51_P100428	2.81763	AK076663	AK076663	Mus musculus adult male testis cDNA, RIKEN full-length enriched library, clone:4930408C10 product:myosin heavy chain, cardiac muscle, adult, full insert sequence [AK076663]
A_51_P362638	2.81744	Trf	NM_133977	Mus musculus transferrin (Trf), mRNA [NM_133977]
A_51_P229344	2.81523	Nxph1	NM_008751	Mus musculus neurexophilin 1 (Nxph1), mRNA [NM_008751]
A_51_P181833	2.81508	Akap9	NM_194462	Mus musculus A kinase (PRKA) anchor protein (yotiao) 9 (Akap9), mRNA [NM_194462]
A_52_P333546	2.81501	D4Ertd681e	AK078562	Mus musculus 11 days embryo gonad cDNA, RIKEN full-length enriched library, clone:7030402E17 product:DNA segment, Chr 4, ERATO Doi 681, expressed, full insert sequence. [AK078562]
A_51_P497350	2.80626	Spint2	AF099020	Mus musculus hepatocyte growth factor activator inhibitor type 2 splice variant 2 (Hai2) mRNA, complete cds. [AF099020]
A_52_P275106	2.80132	TC1642664		BC022175 hydroxysteroid (17-beta) dehydrogenase 4 {Mus musculus} (exp=-1; wgp=0; cg=0), partial (19%) [TC1642664]
A_51_P374752	2.79205	Rbp4	NM_011255	Mus musculus retinol binding protein 4, plasma (Rbp4), mRNA [NM_011255]
A_51_P231042	2.79025	Cd163	NM_053094	Mus musculus CD163 antigen (Cd163), mRNA [NM_053094]
A_51_P164987	2.78312	BC022593	NM_001039723	Mus musculus cDNA sequence BC022593 (BC022593), mRNA [NM_001039723]
A_52_P173703	2.78189	Myrip	NM_144557	Mus musculus myosin VIIA and Rab interacting protein (Myrip), mRNA [NM_144557]
A_52_P409839	2.77973	Gfra4	NM_020014	Mus musculus glial cell line derived neurotrophic factor family receptor alpha 4 (Gfra4), mRNA [NM_020014]
A_51_P491504	2.77911	Aldh5a1	NM_172532	Mus musculus aldhehyde dehydrogenase family 5, subfamily A1 (Aldh5a1), mRNA [NM_172532]
A_52_P402960	2.7791	AI846867	AI846867	UI-M-AI1-afk-f-12-0-UI.s1 NIH_BMAP_MBS_N Mus musculus cDNA clone UI-M-AI1-afk-f-12-0-UI 3'. [AI846867]
A_51_P327585	2.77644	Gstm4	NM_026764	Mus musculus glutathione S-transferase, mu 4 (Gstm4), mRNA [NM_026764]
A_51_P453475	2.77579	Slc1a5	NM_009201	Mus musculus solute carrier family 1 (neutral amino acid transporter), member 5 (Slc1a5), mRNA [NM_009201]
A_51_P327496	2.77266	A_51_P327496
A_51_P425680	2.77179	Ivd	NM_019826	Mus musculus isovaleryl coenzyme A dehydrogenase (Ivd), mRNA [NM_019826]
A_52_P680827	2.77077	Abat	NM_172961	Mus musculus 4-aminobutyrate aminotransferase (Abat), mRNA [NM_172961]
A_51_P161830	2.76906	Enpep	NM_007934	Mus musculus glutamyl aminopeptidase (Enpep), mRNA [NM_007934]
A_52_P920129	2.76411	Gnai1	NM_010305	Mus musculus guanine nucleotide binding protein, alpha inhibiting 1 (Gnai1), mRNA [NM_010305]
A_51_P133819	2.76309	AK084314	AK084314	Mus musculus 12 days embryo eyeball cDNA, RIKEN full-length enriched library, clone:D230021A17 product:unclassifiable, full insert sequence. [AK084314]
A_51_P157171	2.76051	Gas2l1	AK019661	Mus musculus adult male testis cDNA, RIKEN full-length enriched library, clone:4930500E24 product:similar to GAS-2 RELATED PROTEIN ON CHROMOSOME 22 (GAR22 PROTEIN) [Homo sapiens], full insert sequence. [AK019661]
A_51_P392577	2.76	Ccbl2	NM_173763	Mus musculus cysteine conjugate-beta lyase 2 (Ccbl2), mRNA [NM_173763]
A_51_P425824	2.75953	C1qdc2	NM_026125	Mus musculus C1q domain containing 2 (C1qdc2), mRNA [NM_026125]
A_51_P505617	2.75859	Il18r1	NM_008365	Mus musculus interleukin 18 receptor 1 (Il18r1), mRNA [NM_008365]
A_51_P406913	2.75762	Gdf7	NM_013527	Mus musculus growth differentiation factor 7 (Gdf7), mRNA [NM_013527]
A_51_P372992	2.74999	4632428N05Rik	NM_028732	Mus musculus RIKEN cDNA 4632428N05 gene (4632428N05Rik), mRNA [NM_028732]
A_51_P182693	2.74632	Npr1	NM_008727	Mus musculus natriuretic peptide receptor 1 (Npr1), mRNA [NM_008727]
A_52_P353551	2.74522	4932407I05	AK029928	Mus musculus adult male testis cDNA, RIKEN full-length enriched library, clone:4932407I05 product:unclassifiable, full insert sequence. [AK029928]
A_52_P139316	2.7443	NAP112201-1
A_51_P268843	2.73926	Rasip1	NM_028544	Mus musculus Ras interacting protein 1 (Rasip1), mRNA [NM_028544]
A_51_P374476	2.73849	Hbb-b1	NM_008220	Mus musculus hemoglobin, beta adult major chain (Hbb-b1), mRNA [NM_008220]
A_52_P216696	2.73772	A230079K17Rik	NM_172846	Mus musculus RIKEN cDNA A230079K17 gene (A230079K17Rik), mRNA [NM_172846]
A_52_P260346	2.73396	Hbb-b1	NM_008220	Mus musculus hemoglobin, beta adult major chain (Hbb-b1), mRNA [NM_008220]
A_51_P327869	2.73104	TC1620752		Q80WU8_MOUSE (Q80WU8) Parathyroid hormone receptor 1, partial (96%) [TC1620752]
A_52_P302433	2.72628	Plau	NM_008873	Mus musculus plasminogen activator, urokinase (Plau), mRNA [NM_008873]
A_51_P347333	2.72497	Dusp4	AK012530	Mus musculus 11 days embryo whole body cDNA, RIKEN full-length enriched library, clone:2700078F24 product:unclassifiable, full insert sequence [AK012530]
A_51_P462428	2.71916	Galntl2	NM_030166	Mus musculus UDP-N-acetyl-alpha-D-galactosamine:polypeptide N-acetylgalactosaminyltransferase-like 2 (Galntl2), mRNA [NM_030166]
A_51_P188772	2.7183	Rgnef	NM_012026	Mus musculus Rho-guanine nucleotide exchange factor (Rgnef), mRNA [NM_012026]
A_51_P517430	2.71606	Cd1d1	NM_007639	Mus musculus CD1d1 antigen (Cd1d1), mRNA [NM_007639]
A_52_P168567	2.71283	Cebpa	NM_007678	Mus musculus CCAAT/enhancer binding protein (C/EBP), alpha (Cebpa), mRNA [NM_007678]
A_51_P385114	2.7128	A930034L06Rik	NM_175692	Mus musculus RIKEN cDNA A930034L06 gene (A930034L06Rik), mRNA [NM_175692]
A_51_P516753	2.71207	Gimap3	NM_031247	Mus musculus GTPase, IMAP family member 3 (Gimap3), nuclear gene encoding mitochondrial protein, mRNA [NM_031247]
A_52_P370274	2.70995	Pde4b	AK171700	Mus musculus activated spleen cDNA, RIKEN full-length enriched library, clone:F830005J09 product:phosphodiesterase 4B, cAMP specific, full insert sequence. [AK171700]
A_52_P298801	2.70994	Akap7	NM_018747	Mus musculus A kinase (PRKA) anchor protein 7 (Akap7), mRNA [NM_018747]
A_52_P230488	2.70954	TC1711002		NM_068667 T22D1.2 {Caenorhabditis elegans} (exp=-1; wgp=0; cg=0), partial (9%) [TC1711002]
A_51_P464394	2.70831	Klb	NM_031180	Mus musculus klotho beta (Klb), mRNA [NM_031180]
A_52_P675157	2.70774	Acp5	NM_007388	Mus musculus acid phosphatase 5, tartrate resistant (Acp5), mRNA [NM_007388]
A_52_P59801	2.70565	Fry	AK220506	Mus musculus mRNA for mKIAA4143 protein. [AK220506]
A_51_P365351	2.7054	Dhdh	NM_027903	Mus musculus dihydrodiol dehydrogenase (dimeric) (Dhdh), mRNA [NM_027903]
A_52_P220275	2.70535	Gpr34	NM_011823	Mus musculus G protein-coupled receptor 34 (Gpr34), mRNA [NM_011823]
A_51_P195066	2.70517	Sema4a	NM_013658	Mus musculus sema domain, immunoglobulin domain (Ig), transmembrane domain (TM) and short cytoplasmic domain, (semaphorin) 4A (Sema4a), mRNA [NM_013658]
A_52_P452540	2.70344	Gucy1a3	NM_021896	Mus musculus guanylate cyclase 1, soluble, alpha 3 (Gucy1a3), mRNA [NM_021896]
A_51_P479311	2.70137	Gstm1	NM_010358	Mus musculus glutathione S-transferase, mu 1 (Gstm1), mRNA [NM_010358]
A_51_P385786	2.69784	Id1	NM_010495	Mus musculus inhibitor of DNA binding 1 (Id1), mRNA [NM_010495]
A_52_P616332	2.69487	Atp10d	NM_153389	Mus musculus ATPase, Class V, type 10D (Atp10d), mRNA [NM_153389]
A_51_P281057	2.69372	A_51_P281057
A_51_P374468	2.69301	Hbb-b1	NM_008220	Mus musculus hemoglobin, beta adult major chain (Hbb-b1), mRNA [NM_008220]
A_51_P214837	2.69267	Arhgap12	NM_029277	Mus musculus Rho GTPase activating protein 12 (Arhgap12), transcript variant 2, mRNA [NM_029277]
A_51_P394394	2.6924	Tspan2	NM_027533	Mus musculus tetraspanin 2 (Tspan2), mRNA [NM_027533]
A_52_P154800	2.69197	Hrasls3	NM_139269	Mus musculus HRAS like suppressor 3 (Hrasls3), mRNA [NM_139269]
A_52_P101279	2.69194	Glul	NM_008131	Mus musculus glutamate-ammonia ligase (glutamine synthetase) (Glul), mRNA [NM_008131]
A_51_P492897	2.68911	4933430I17Rik	NM_177607	Mus musculus RIKEN cDNA 4933430I17 gene (4933430I17Rik), mRNA [NM_177607]
A_51_P290399	2.68853	AI661453	NM_145489	Mus musculus expressed sequence AI661453 (AI661453), mRNA [NM_145489]
A_52_P385896	2.68816	Atp8a1	NM_001038999	Mus musculus ATPase, aminophospholipid transporter (APLT), class I, type 8A, member 1 (Atp8a1), transcript variant 1, mRNA [NM_001038999]
A_52_P193941	2.68787	Cd300lg	NM_027987	Mus musculus CD300 antigen like family member G (Cd300lg), mRNA [NM_027987]
A_51_P434859	2.6877	Mllt4	NM_010806	Mus musculus myeloid/lymphoid or mixed lineage-leukemia translocation to 4 homolog (Drosophila) (Mllt4), mRNA [NM_010806]
A_52_P553443	2.68747	D730040F13Rik	NM_175518	Mus musculus RIKEN cDNA D730040F13 gene (D730040F13Rik), mRNA [NM_175518]
A_52_P325443	2.68525	Arhgap29	NM_172525	Mus musculus Rho GTPase activating protein 29 (Arhgap29), mRNA [NM_172525]
A_51_P478419	2.68444	Unc45b	NM_178680	Mus musculus unc-45 homolog B (C. elegans) (Unc45b), mRNA [NM_178680]
A_51_P520802	2.68379	BC020535	NM_145536	Mus musculus cDNA sequence BC020535 (BC020535), mRNA [NM_145536]
A_51_P302823	2.68228	Cib2	NM_019686	Mus musculus calcium and integrin binding family member 2 (Cib2), mRNA [NM_019686]
A_51_P249793	2.68195	Dusp28	NM_175118	Mus musculus dual specificity phosphatase 28 (Dusp28), mRNA [NM_175118]
A_52_P278538	2.68162	Hba-a1	NM_008218	Mus musculus hemoglobin alpha, adult chain 1 (Hba-a1), mRNA [NM_008218]
A_51_P475689	2.6807	Cd209b	NM_026972	Mus musculus CD209b antigen (Cd209b), transcript variant 1, mRNA [NM_026972]
A_51_P207412	2.67716	Ankrd32	NM_134071	Mus musculus ankyrin repeat domain 32 (Ankrd32), mRNA [NM_134071]
A_52_P598732	2.67682	4930523C07Rik	AK040601	Mus musculus 0 day neonate thymus cDNA, RIKEN full-length enriched library, clone:A430108H07 product:unclassifiable, full insert sequence. [AK040601]
A_51_P399477	2.67554	D030011O10Rik	NM_177192	Mus musculus RIKEN cDNA D030011O10 gene (D030011O10Rik), mRNA [NM_177192]
A_51_P361220	2.67527	Fzd4	NM_008055	Mus musculus frizzled homolog 4 (Drosophila) (Fzd4), mRNA [NM_008055]
A_51_P436977	2.6746	Duox2	AK079781	Mus musculus 0 day neonate thymus cDNA, RIKEN full-length enriched library, clone:A430065P05 product:hypothetical OXIDASE CALCIUM-BINDING TRANSMEMBRANE REDUCTASE TRANSPORT NADPH BURST RESPIRATORY GLYCOPROTEIN OXIDOREDUCTASE containing protein, full...
A_52_P18068	2.67068	4932441K18Rik	NM_178935	Mus musculus RIKEN cDNA 4932441K18 gene (4932441K18Rik), mRNA [NM_178935]
A_51_P252565	2.66965	Alox15	NM_009660	Mus musculus arachidonate 15-lipoxygenase (Alox15), mRNA [NM_009660]
A_51_P354642	2.6693	Ero1lb	AK004981	Mus musculus adult male liver cDNA, RIKEN full-length enriched library, clone:1300013B24 product:ENDOPLASMIC RETICULUM OXIDOREDUCTIN 1-LBETA homolog [Homo sapiens], full insert sequence. [AK004981]
A_52_P288251	2.66781	BC054438	NM_001001183	Mus musculus cDNA sequence BC054438 (BC054438), mRNA [NM_001001183]
A_51_P112734	2.66781	Slc7a8	NM_016972	Mus musculus solute carrier family 7 (cationic amino acid transporter, y+ system), member 8 (Slc7a8), mRNA [NM_016972]
A_51_P379976	2.66773	Arl4a	NM_007487	Mus musculus ADP-ribosylation factor-like 4A (Arl4a), transcript variant 1, mRNA [NM_007487]
A_52_P373357	2.66719	Hmga2	AK035164	Mus musculus 12 days embryo embryonic body between diaphragm region and neck cDNA, RIKEN full-length enriched library, clone:9430095D03 product:unclassifiable, full insert sequence. [AK035164]
A_51_P432820	2.66544	BC019382	BC019382	Mus musculus, clone IMAGE:4501155, mRNA. [BC019382]
A_52_P213516	2.66431	Acvr1c	NM_001033369	Mus musculus activin A receptor, type IC (Acvr1c), mRNA [NM_001033369]
A_52_P248604	2.66346	Cdh5	NM_009868	Mus musculus cadherin 5 (Cdh5), mRNA [NM_009868]
A_51_P164504	2.6617	Apoc1	NM_007469	Mus musculus apolipoprotein C-I (Apoc1), mRNA [NM_007469]
A_52_P590756	2.66068	Slc25a35	AK035739	Mus musculus adult male urinary bladder cDNA, RIKEN full-length enriched library, clone:9530097O21 product:RAN guanine nucleotide release factor, full insert sequence. [AK035739]
A_51_P337412	2.65949	Efemp1	NM_146015	Mus musculus epidermal growth factor-containing fibulin-like extracellular matrix protein 1 (Efemp1), mRNA [NM_146015]
A_52_P281702	2.65883	Igfbp5	NM_010518	Mus musculus insulin-like growth factor binding protein 5 (Igfbp5), mRNA [NM_010518]
A_52_P899263	2.65839	Aco2	AK029122	Mus musculus 10 days neonate skin cDNA, RIKEN full-length enriched library, clone:4732494K09 product:hypothetical protein, full insert sequence. [AK029122]
A_52_P263763	2.65675	Mtap7d3	NM_177293	Mus musculus MAP7 domain containing 3 (Mtap7d3), mRNA [NM_177293]
A_52_P487454	2.65539	Htr2c	NM_008312	Mus musculus 5-hydroxytryptamine (serotonin) receptor 2C (Htr2c), mRNA [NM_008312]
A_52_P326096	2.65506	Meox2	NM_008584	Mus musculus mesenchyme homeobox 2 (Meox2), mRNA [NM_008584]
A_52_P795553	2.65506	AK083849	AK083849	Mus musculus 12 days embryo spinal ganglion cDNA, RIKEN full-length enriched library, clone:D130023A08 product:unclassifiable, full insert sequence. [AK083849]
A_52_P207303	2.65396	Bmp3	NM_173404	Mus musculus bone morphogenetic protein 3 (Bmp3), mRNA [NM_173404]
A_51_P479519	2.65308	Itgb8	AK029281	Mus musculus 0 day neonate head cDNA, RIKEN full-length enriched library, clone:4832412O06 product:SIMILAR TO INTEGRIN, BETA 8 homolog [Homo sapiens], full insert sequence. [AK029281]
A_52_P244702	2.65203	Tcf7	NM_009331	Mus musculus transcription factor 7, T-cell specific (Tcf7), mRNA [NM_009331]
A_51_P521304	2.6509	Klhl13	NM_026167	Mus musculus kelch-like 13 (Drosophila) (Klhl13), mRNA [NM_026167]
A_51_P363338	2.64986	Prkcm	NM_008858	Mus musculus protein kinase C, mu (Prkcm), mRNA [NM_008858]
A_51_P139920	2.64852	Mgll	NM_011844	Mus musculus monoglyceride lipase (Mgll), mRNA [NM_011844]
A_51_P442246	2.64784	4921508A21Rik	AK014841	Mus musculus adult male testis cDNA, RIKEN full-length enriched library, clone:4921508A21 product:weakly similar to PALE EAR (EP MUTANT ALLELE) (FRAGMENT) [Mus musculus], full insert sequence. [AK014841]
A_51_P150069	2.64482	Leng8	NM_172736	Mus musculus leukocyte receptor cluster (LRC) member 8 (Leng8), mRNA [NM_172736]
A_51_P309056	2.6424	Cdh5	NM_009868	Mus musculus cadherin 5 (Cdh5), mRNA [NM_009868]
A_52_P183368	2.63778	Tbx3	NM_011535	Mus musculus T-box 3 (Tbx3), transcript variant 1, mRNA [NM_011535]
A_51_P321643	2.63632	H6pd	NM_173371	Mus musculus hexose-6-phosphate dehydrogenase (glucose 1-dehydrogenase) (H6pd), mRNA [NM_173371]
A_51_P417956	2.63485	Klk9	NM_028660	Mus musculus kallikrein related-peptidase 9 (Klk9), mRNA [NM_028660]
A_51_P341336	2.63391	Bcl2l14	NM_025778	Mus musculus Bcl2-like 14 (apoptosis facilitator) (Bcl2l14), mRNA [NM_025778]
A_51_P144264	2.63389	Klf2	NM_008452	Mus musculus Kruppel-like factor 2 (lung) (Klf2), mRNA [NM_008452]
A_52_P113765	2.63205	D830026I12Rik	AK081964	Mus musculus 16 days embryo head cDNA, RIKEN full-length enriched library, clone:C130090D04 product:unclassifiable, full insert sequence [AK081964]
A_51_P160344	2.63104	Prr6	AK014046	Mus musculus 13 days embryo head cDNA, RIKEN full-length enriched library, clone:3110013H01 product:hypothetical protein, full insert sequence. [AK014046]
A_51_P240036	2.62847	Serpina3k	NM_011458	Mus musculus serine (or cysteine) peptidase inhibitor, clade A, member 3K (Serpina3k), mRNA [NM_011458]
A_52_P97699	2.62645	D430019H16Rik	BC058677	Mus musculus RIKEN cDNA D430019H16 gene, mRNA (cDNA clone IMAGE:6834465), partial cds [BC058677]
A_51_P330444	2.62136	AK084244	AK084244	Mus musculus 12 days embryo eyeball cDNA, RIKEN full-length enriched library, clone:D230012O14 product:unclassifiable, full insert sequence. [AK084244]
A_52_P117221	2.6155	C230094A16Rik	NM_146016	Mus musculus RIKEN cDNA C230094A16 gene (C230094A16Rik), mRNA [NM_146016]
A_52_P38117	2.61525	A530016L24Rik	NM_177039	Mus musculus RIKEN cDNA A530016L24 gene (A530016L24Rik), mRNA [NM_177039]
A_52_P640512	2.61515	Ablim3	NM_198649	Mus musculus actin binding LIM protein family, member 3 (Ablim3), mRNA [NM_198649]
A_51_P359586	2.61488	Pfkfb1	NM_008824	Mus musculus 6-phosphofructo-2-kinase/fructose-2,6-biphosphatase 1 (Pfkfb1), mRNA [NM_008824]
A_52_P166961	2.61257	Fyb	AK038161	Mus musculus 16 days neonate thymus cDNA, RIKEN full-length enriched library, clone:A130083G11 product:unclassifiable, full insert sequence. [AK038161]
A_52_P382325	2.61079	Ahnak	NM_001039959	Mus musculus AHNAK nucleoprotein (desmoyokin) (Ahnak), transcript variant 3, mRNA [NM_001039959]
A_52_P297765	2.60868	2310031A18Rik	NM_001081120	Mus musculus RIKEN cDNA 2310031A18 gene (2310031A18Rik), mRNA [NM_001081120]
A_52_P441168	2.60763	ENSMUST00000036010
A_51_P391805	2.60661	Dkkl1	NM_015789	Mus musculus dickkopf-like 1 (Dkkl1), mRNA [NM_015789]
A_51_P173601	2.60383	Bcam	NM_020486	Mus musculus basal cell adhesion molecule (Bcam), mRNA [NM_020486]
A_51_P391445	2.6035	Ifngr1	NM_010511	Mus musculus interferon gamma receptor 1 (Ifngr1), mRNA [NM_010511]
A_51_P446477	2.60313	Cldnd1	NM_171826	Mus musculus claudin domain containing 1 (Cldnd1), mRNA [NM_171826]
A_51_P165882	2.60132	Slc22a18	NM_008767	Mus musculus solute carrier family 22 (organic cation transporter), member 18 (Slc22a18), transcript variant 1, mRNA [NM_008767]
A_52_P199905	2.60112	Slc27a1	AK165571	Mus musculus kidney CCL-142 RAG cDNA, RIKEN full-length enriched library, clone:G430020K07 product:solute carrier family 27 (fatty acid transporter), member 1, full insert sequence. [AK165571]
A_52_P373938	2.59816	Gpd2	AK080240	Mus musculus adult male aorta and vein cDNA, RIKEN full-length enriched library, clone:A530087K12 product:unclassifiable, full insert sequence [AK080240]
A_52_P155849	2.59743	Arl4a	NM_007487	Mus musculus ADP-ribosylation factor-like 4A (Arl4a), transcript variant 1, mRNA [NM_007487]
A_51_P480578	2.5964	Pcx	NM_008797	Mus musculus pyruvate carboxylase (Pcx), mRNA [NM_008797]
A_51_P389377	2.59619	AK042636	AK042636	Mus musculus 7 days neonate cerebellum cDNA, RIKEN full-length enriched library, clone:A730012J23 product:unclassifiable, full insert sequence. [AK042636]
A_52_P550049	2.59498	Nfya	BC057099	Mus musculus nuclear transcription factor-Y alpha, mRNA (cDNA clone MGC:63366 IMAGE:5716111), complete cds. [BC057099]
A_52_P255782	2.58782	Slco2b1	NM_175316	Mus musculus solute carrier organic anion transporter family, member 2b1 (Slco2b1), mRNA [NM_175316]
A_52_P165705	2.58735	Cd1d2	NM_007640	Mus musculus CD1d2 antigen (Cd1d2), mRNA [NM_007640]
A_52_P191210	2.58483	9530091C08Rik	AK028720	Mus musculus 10 days neonate skin cDNA, RIKEN full-length enriched library, clone:4732444G10 product:unclassifiable, full insert sequence. [AK028720]
A_51_P142421	2.58408	Rspo1	NM_138683	Mus musculus R-spondin homolog (Xenopus laevis) (Rspo1), mRNA [NM_138683]
A_51_P321341	2.58365	Sult1a1	NM_133670	Mus musculus sulfotransferase family 1A, phenol-preferring, member 1 (Sult1a1), mRNA [NM_133670]
A_52_P358138	2.5819	AF044174	AF044174	MMANB01 Mus musculus lysosomal alpha-mannosidase (Man2b) gene, exon 1 [AF044174]
A_51_P504512	2.58029	Lyzl6	NM_027083	Mus musculus lysozyme-like 6 (Lyzl6), mRNA [NM_027083]
A_51_P387108	2.57966	4930535E02Rik	CA465081	AGENCOURT_10722792 NIH_MGC_169 Mus musculus cDNA clone IMAGE:6772955 5', mRNA sequence [CA465081]
A_51_P326187	2.57595	4931406P16Rik	NM_172741	Mus musculus RIKEN cDNA 4931406P16 gene (4931406P16Rik), mRNA [NM_172741]
A_51_P383991	2.57476	Sept4	NM_011129	Mus musculus septin 4 (Sept4), mRNA [NM_011129]
A_51_P458866	2.57458	F11r	NM_172647	Mus musculus F11 receptor (F11r), mRNA [NM_172647]
A_51_P502225	2.57316	Slc22a4	NM_019687	Mus musculus solute carrier family 22 (organic cation transporter), member 4 (Slc22a4), mRNA [NM_019687]
A_52_P109010	2.57044	Hipk3	XM_001001414	PREDICTED: Mus musculus homeodomain interacting protein kinase 3, transcript variant 4 (Hipk3), mRNA [XM_001001414]
A_51_P437787	2.56964	Rbm28	NM_026650	Mus musculus RNA binding motif protein 28 (Rbm28), transcript variant 1, mRNA [NM_026650]
A_52_P200610	2.56885	C1qtnf9	NM_183175	Mus musculus C1q and tumor necrosis factor related protein 9 (C1qtnf9), mRNA [NM_183175]
A_51_P115626	2.56722	Shank3	AJ245904	Mus musculus mRNA for Shank3b protein (shank3 gene). [AJ245904]
A_52_P78730	2.56299	1110032A03Rik	NM_023483	Mus musculus RIKEN cDNA 1110032A03 gene (1110032A03Rik), mRNA [NM_023483]
A_51_P273684	2.56206	Gbe1	NM_028803	Mus musculus glucan (1,4-alpha-), branching enzyme 1 (Gbe1), mRNA [NM_028803]
A_51_P124133	2.55923	Cyp2d9	NM_010006	Mus musculus cytochrome P450, family 2, subfamily d, polypeptide 9 (Cyp2d9), mRNA [NM_010006]
A_51_P195875	2.55812	Notch4	NM_010929	Mus musculus Notch gene homolog 4 (Drosophila) (Notch4), mRNA [NM_010929]
A_51_P368580	2.55753	Ablim1	BC032216	Mus musculus actin-binding LIM protein 1, mRNA (cDNA clone IMAGE:5323557), complete cds. [BC032216]
A_52_P279294	2.55616	2900062L11Rik	BC030351	Mus musculus RIKEN cDNA 2900062L11 gene, mRNA (cDNA clone MGC:40746 IMAGE:5365902), complete cds [BC030351]
A_51_P387348	2.55594	Adora2a	NM_009630	Mus musculus adenosine A2a receptor (Adora2a), mRNA [NM_009630]
A_52_P448060	2.55512	2210010C04Rik	NM_023333	Mus musculus RIKEN cDNA 2210010C04 gene (2210010C04Rik), mRNA [NM_023333]
A_51_P148093	2.55325	Ptprm	NM_008984	Mus musculus protein tyrosine phosphatase, receptor type, M (Ptprm), mRNA [NM_008984]
A_52_P561650	2.55266	Vwa1	NM_147776	Mus musculus von Willebrand factor A domain containing 1 (Vwa1), mRNA [NM_147776]
A_51_P143185	2.55236	AK047920	AK047920	Mus musculus 16 days embryo head cDNA, RIKEN full-length enriched library, clone:C130021N02 product:unclassifiable, full insert sequence. [AK047920]
A_52_P431164	2.5511	Thpo	NM_009379	Mus musculus thrombopoietin (Thpo), mRNA [NM_009379]
A_51_P133097	2.55062	8430416G17Rik	AK018420	Mus musculus 16 days embryo lung cDNA, RIKEN full-length enriched library, clone:8430416G17 product:unclassifiable, full insert sequence. [AK018420]
A_52_P128691	2.5503	Gpr4	NM_175668	Mus musculus G protein-coupled receptor 4 (Gpr4), mRNA [NM_175668]
A_52_P810953	2.54933	AK041753	AK041753	Mus musculus 3 days neonate thymus cDNA, RIKEN full-length enriched library, clone:A630035A22 product:unclassifiable, full insert sequence. [AK041753]
A_51_P259876	2.54774	Dock9	NM_001081039	Mus musculus dedicator of cytokinesis 9 (Dock9), mRNA [NM_001081039]
A_51_P188373	2.54276	Stim1	NM_009287	Mus musculus stromal interaction molecule 1 (Stim1), mRNA [NM_009287]
A_51_P205390	2.54253	1700040L02Rik	NM_028491	Mus musculus RIKEN cDNA 1700040L02 gene (1700040L02Rik), mRNA [NM_028491]
A_52_P483104	2.54209	Lpin1	NM_015763	Mus musculus lipin 1 (Lpin1), transcript variant 2, mRNA [NM_015763]
A_51_P398723	2.53969	Flt1	NM_010228	Mus musculus FMS-like tyrosine kinase 1 (Flt1), mRNA [NM_010228]
A_51_P414079	2.53965	Trp53i11	NM_001025246	Mus musculus transformation related protein 53 inducible protein 11 (Trp53i11), mRNA [NM_001025246]
A_51_P471362	2.53777	BC038613	NM_153784	Mus musculus cDNA sequence BC038613 (BC038613), mRNA [NM_153784]
A_52_P232580	2.53587	Dyrk3	NM_145508	Mus musculus dual-specificity tyrosine-(Y)-phosphorylation regulated kinase 3 (Dyrk3), mRNA [NM_145508]
A_52_P609334	2.5323	Klhdc8b	NM_030075	Mus musculus kelch domain containing 8B (Klhdc8b), mRNA [NM_030075]
A_51_P237585	2.53171	Btnl9	NM_172793	Mus musculus butyrophilin-like 9 (Btnl9), mRNA [NM_172793]
A_51_P309677	2.53044	Tbc1d19	NM_144517	Mus musculus TBC1 domain family, member 19 (Tbc1d19), mRNA [NM_144517]
A_51_P454949	2.53042	Gstm3	NM_010359	Mus musculus glutathione S-transferase, mu 3 (Gstm3), mRNA [NM_010359]
A_52_P354752	2.52994	Ibrdc2	NM_146042	Mus musculus IBR domain containing 2 (Ibrdc2), mRNA [NM_146042]
A_52_P606569	2.52938	4930567H12Rik	AK016240	Mus musculus adult male testis cDNA, RIKEN full-length enriched library, clone:4930567H12 product:unclassifiable, full insert sequence. [AK016240]
A_51_P255312	2.52858	5330420P17Rik	AK019899	Mus musculus adult male pituitary gland cDNA, RIKEN full-length enriched library, clone:5330420P17 product:SERINE/THREONINE-PROTEIN KINASE PAK 2 (EC 2.7.1.-) (P21-ACTIVATED KINASE 2) (PAK-2) (GAMMA-PAK) (P62-PAK) homolog [Rattus norvegicus], full...
A_51_P140966	2.52739	Olfr1359	NM_001011820	Mus musculus olfactory receptor 1359 (Olfr1359), mRNA [NM_001011820]
A_51_P229911	2.52623	Adcy4	NM_080435	Mus musculus adenylate cyclase 4 (Adcy4), mRNA [NM_080435]
A_52_P309183	2.52513	Tktl2	AK029871	Mus musculus adult male testis cDNA, RIKEN full-length enriched library, clone:4931419A11 product:TRANSKETOLASE (FRAGMENT) homolog [Mus musculus], full insert sequence [AK029871]
A_51_P215077	2.5245	Mgst3	NM_025569	Mus musculus microsomal glutathione S-transferase 3 (Mgst3), mRNA [NM_025569]
A_51_P130374	2.52415	Tek	NM_013690	Mus musculus endothelial-specific receptor tyrosine kinase (Tek), mRNA [NM_013690]
A_51_P236303	2.52402	Serpina1d	NM_009246	Mus musculus serine (or cysteine) peptidase inhibitor, clade A, member 1d (Serpina1d), mRNA [NM_009246]
A_51_P302358	2.52195	Ltb	NM_008518	Mus musculus lymphotoxin B (Ltb), mRNA [NM_008518]
A_52_P609778	2.52177	Mgll	NM_011844	Mus musculus monoglyceride lipase (Mgll), mRNA [NM_011844]
A_51_P317695	2.52089	Trpc3	NM_019510	Mus musculus transient receptor potential cation channel, subfamily C, member 3 (Trpc3), mRNA [NM_019510]
A_51_P262701	2.51824	Cpb2	NM_019775	Mus musculus carboxypeptidase B2 (plasma) (Cpb2), mRNA [NM_019775]
A_51_P363461	2.51797	BC023710	BC023710	Mus musculus, clone IMAGE:5346272, mRNA [BC023710]
A_51_P489633	2.51744	Epb4.9	NM_013514	Mus musculus erythrocyte protein band 4.9 (Epb4.9), mRNA [NM_013514]
A_51_P208922	2.51459	Stc2	NM_011491	Mus musculus stanniocalcin 2 (Stc2), mRNA [NM_011491]
A_52_P682382	2.51438	Scd1	NM_009127	Mus musculus stearoyl-Coenzyme A desaturase 1 (Scd1), mRNA [NM_009127]
A_52_P631499	2.51354	Exoc6	XM_974947	PREDICTED: Mus musculus exocyst complex component 6 (Exoc6), mRNA [XM_974947]
A_52_P683287	2.51256	4921507P07Rik	NM_027564	Mus musculus RIKEN cDNA 4921507P07 gene (4921507P07Rik), mRNA [NM_027564]
A_52_P302345	2.51238	Cyp4v3	NM_133969	Mus musculus cytochrome P450, family 4, subfamily v, polypeptide 3 (Cyp4v3), mRNA [NM_133969]
A_52_P588316	2.51194	1700007E06Rik	AK029781	Mus musculus adult male testis cDNA, RIKEN full-length enriched library, clone:4930553D05 product:unclassifiable, full insert sequence. [AK029781]
A_52_P544043	2.51151	Pcsk5	BC013068	Mus musculus proprotein convertase subtilisin/kexin type 5, mRNA (cDNA clone IMAGE:4036159), complete cds. [BC013068]
A_52_P483101	2.51129	Lpin1	NM_015763	Mus musculus lipin 1 (Lpin1), transcript variant 2, mRNA [NM_015763]
A_52_P166694	2.50981	Vamp1	NM_009496	Mus musculus vesicle-associated membrane protein 1 (Vamp1), transcript variant 1, mRNA [NM_009496]
A_52_P163849	2.50782	Ivns1abp	NM_001039511	Mus musculus influenza virus NS1A binding protein (Ivns1abp), transcript variant 1, mRNA [NM_001039511]
A_51_P439299	2.50733	Tnfrsf19l	NM_177073	Mus musculus tumor necrosis factor receptor superfamily, member 19-like (Tnfrsf19l), mRNA [NM_177073]
A_52_P83549	2.50726	H6pd	NM_173371	Mus musculus hexose-6-phosphate dehydrogenase (glucose 1-dehydrogenase) (H6pd), mRNA [NM_173371]
A_52_P43326	2.50719	Rgs4	NM_009062	Mus musculus regulator of G-protein signaling 4 (Rgs4), mRNA [NM_009062]
A_52_P413826	2.50606	AK052617	AK052617	Mus musculus 0 day neonate kidney cDNA, RIKEN full-length enriched library, clone:D630006C15 product:unclassifiable, full insert sequence. [AK052617]
A_51_P374707	2.505	Tspan12	NM_173007	Mus musculus tetraspanin 12 (Tspan12), mRNA [NM_173007]
A_51_P114005	2.50451	Gstm7	NM_026672	Mus musculus glutathione S-transferase, mu 7 (Gstm7), mRNA [NM_026672]
A_51_P277336	2.50442	Sdpr	NM_138741	Mus musculus serum deprivation response (Sdpr), mRNA [NM_138741]
A_51_P465292	2.50306	Hnmt	NM_080462	Mus musculus histamine N-methyltransferase (Hnmt), mRNA [NM_080462]
A_51_P363330	2.50161	AK089670	AK089670	Mus musculus activated spleen cDNA, RIKEN full-length enriched library, clone:F830008D13 product:unclassifiable, full insert sequence. [AK089670]
A_51_P208931	2.50012	C330016O10Rik	NM_145974	Mus musculus RIKEN cDNA C330016O10 gene (C330016O10Rik), mRNA [NM_145974]
A_51_P310164	2.50005	2810459M11Rik	AK013367	Mus musculus 10, 11 days embryo whole body cDNA, RIKEN full-length enriched library, clone:2810459M11 product:hypothetical protein, full insert sequence. [AK013367]
A_52_P1109289	2.50005	TC1675885
A_51_P432958	2.49923	Podn	NM_172874	Mus musculus podocan (Podn), mRNA [NM_172874]
A_51_P173320	2.4992	NAP068899-1
A_51_P181705	2.4985	5430405N12Rik	AK017277	Mus musculus 6 days neonate head cDNA, RIKEN full-length enriched library, clone:5430405N12 product:unclassifiable, full insert sequence [AK017277]
A_52_P1197518	2.4966	TC1582889		NM_001006437 nuclear NF-kappaB activating protein {Gallus gallus} (exp=-1; wgp=0; cg=0), partial (10%) [TC1582889]
A_51_P213940	2.49616	Sfn	AF058798	Mus musculus 14-3-3 protein sigma mRNA, complete cds. [AF058798]
A_52_P188589	2.49495	Gm447	NM_001007590	Mus musculus gene model 447, (NCBI) (Gm447), mRNA [NM_001007590]
A_51_P379385	2.49366	Abca8a	NM_153145	Mus musculus ATP-binding cassette, sub-family A (ABC1), member 8a (Abca8a), mRNA [NM_153145]
A_51_P335000	2.49317	Fhl1	NM_010211	Mus musculus four and a half LIM domains 1 (Fhl1), transcript variant 3, mRNA [NM_010211]
A_52_P312102	2.49297	Sema3g	AK129018	Mus musculus cDNA fis, clone TRACH3033868, highly similar to Homo sapiens semaphorin sem2 [AK129018]
A_51_P414396	2.49169	Mmrn2	NM_153127	Mus musculus multimerin 2 (Mmrn2), mRNA [NM_153127]
A_51_P250058	2.49135	TC1605426
A_51_P334785	2.49124	AI447904	NM_175026	Mus musculus expressed sequence AI447904 (AI447904), mRNA [NM_175026]
A_51_P109840	2.49121	Vtn	NM_011707	Mus musculus vitronectin (Vtn), mRNA [NM_011707]
A_52_P818682	2.49105	CB845695	CB845695	M2PN-1289 MOUSE POST-NATAL DAY 2 EYE Mus musculus cDNA 5', mRNA sequence [CB845695]
A_51_P364250	2.49022	Itih5	NM_172471	Mus musculus inter-alpha (globulin) inhibitor H5 (Itih5), mRNA [NM_172471]
A_51_P186552	2.48851	C630004H02Rik	NM_175454	Mus musculus RIKEN cDNA C630004H02 gene (C630004H02Rik), mRNA [NM_175454]
A_51_P209261	2.48559	Sqrdl	NM_021507	Mus musculus sulfide quinone reductase-like (yeast) (Sqrdl), mRNA [NM_021507]
A_51_P374571	2.48542	Igfbp6	NM_008344	Mus musculus insulin-like growth factor binding protein 6 (Igfbp6), mRNA [NM_008344]
AT_ssM_PC_3	2.48533	AT_ssM_PC_3
A_51_P143190	2.48182	Lyl1	NM_008535	Mus musculus lymphoblastomic leukemia (Lyl1), mRNA [NM_008535]
A_52_P662226	2.4814	Pon3	NM_173006	Mus musculus paraoxonase 3 (Pon3), mRNA [NM_173006]
A_52_P64376	2.48062	Mogat1	NM_026713	Mus musculus monoacylglycerol O-acyltransferase 1 (Mogat1), mRNA [NM_026713]
A_52_P5891	2.47985	1500005K14Rik	XM_893392	PREDICTED: Mus musculus RIKEN cDNA 1500005K14 gene (1500005K14Rik), mRNA [XM_893392]
A_52_P263962	2.47909	4922505G16Rik	NM_001039557	Mus musculus RIKEN cDNA 4922505G16 gene (4922505G16Rik), mRNA [NM_001039557]
A_52_P260818	2.47835	Card10	NM_130859	Mus musculus caspase recruitment domain family, member 10 (Card10), mRNA [NM_130859]
A_51_P142972	2.47774	Prdm8	NM_029947	Mus musculus PR domain containing 8 (Prdm8), mRNA [NM_029947]
A_51_P424990	2.47752	Klhdc7a	NM_173427	Mus musculus kelch domain containing 7A (Klhdc7a), mRNA [NM_173427]
A_51_P311836	2.47568	A_51_P311836
A_51_P393223	2.47537	Ankrd23	BC023221	Mus musculus ankyrin repeat domain 23, mRNA (cDNA clone IMAGE:5355604). [BC023221]
A_52_P883455	2.47287	AK045833	AK045833	Mus musculus adult male corpora quadrigemina cDNA, RIKEN full-length enriched library, clone:B230313I23 product:unclassifiable, full insert sequence. [AK045833]
A_52_P287338	2.47027	Eif4e3	NM_025829	Mus musculus eukaryotic translation initiation factor 4E member 3 (Eif4e3), mRNA [NM_025829]
A_51_P268234	2.46931	2010004A03Rik	NM_029646	Mus musculus RIKEN cDNA 2010004A03 gene (2010004A03Rik), mRNA [NM_029646]
A_51_P365008	2.46919	Tns1	XM_619639	PREDICTED: Mus musculus tensin 1 (Tns1), mRNA [XM_619639]
A_51_P319022	2.46812	Cxcr3	NM_009910	Mus musculus chemokine (C-X-C motif) receptor 3 (Cxcr3), mRNA [NM_009910]
A_51_P272283	2.46569	Cmbl	NM_181588	Mus musculus carboxymethylenebutenolidase-like (Pseudomonas) (Cmbl), mRNA [NM_181588]
A_52_P221776	2.46549	Kif12	NM_010616	Mus musculus kinesin family member 12 (Kif12), mRNA [NM_010616]
A_51_P306387	2.46435	Klra18	NM_053153	Mus musculus killer cell lectin-like receptor, subfamily A, member 18 (Klra18), mRNA [NM_053153]
A_51_P398164	2.46405	Klhl2	NM_178633	Mus musculus kelch-like 2, Mayven (Drosophila) (Klhl2), mRNA [NM_178633]
A_52_P551421	2.46029	NAP056427-1
A_51_P427563	2.46025	Cpne8	NM_025815	Mus musculus copine VIII (Cpne8), transcript variant 1, mRNA [NM_025815]
A_51_P188993	2.45925	Dhrs7c	AK003267	Mus musculus 18-day embryo whole body cDNA, RIKEN full-length enriched library, clone:1110001P11 product:unclassifiable, full insert sequence. [AK003267]
A_52_P88033	2.4591	Myh7	NM_080728	Mus musculus myosin, heavy polypeptide 7, cardiac muscle, beta (Myh7), mRNA [NM_080728]
A_52_P247994	2.45902	Thsd7b	NM_172485	Mus musculus thrombospondin, type I, domain containing 7B (Thsd7b), mRNA [NM_172485]
A_51_P244020	2.45861	Rtbdn	NM_144929	Mus musculus retbindin (Rtbdn), mRNA [NM_144929]
A_51_P380750	2.45814	Cbfa2t3h	NM_009824	Mus musculus core-binding factor, runt domain, alpha subunit 2, translocated to, 3 homolog (human) (Cbfa2t3h), mRNA [NM_009824]
A_51_P426875	2.45646	Gdpd3	NM_024228	Mus musculus glycerophosphodiester phosphodiesterase domain containing 3 (Gdpd3), mRNA [NM_024228]
A_51_P373793	2.45401	Fgd5	NM_172731	Mus musculus FYVE, RhoGEF and PH domain containing 5 (Fgd5), mRNA [NM_172731]
A_51_P138189	2.45372	Mthfs	NM_026829	Mus musculus 5, 10-methenyltetrahydrofolate synthetase (Mthfs), mRNA [NM_026829]
A_52_P365768	2.45371	Nsun2	NM_145354	Mus musculus NOL1/NOP2/Sun domain family 2 (Nsun2), mRNA [NM_145354]
A_52_P601333	2.45322	6230424C14Rik	AK078961	Mus musculus adult male cecum cDNA, RIKEN full-length enriched library, clone:9130410H17 product:unclassifiable, full insert sequence [AK078961]
A_52_P369123	2.45272	Gm967	BC099492	Mus musculus gene model 967, (NCBI), mRNA (cDNA clone IMAGE:30843089), partial cds. [BC099492]
A_51_P107752	2.45156	E430014L09Rik	AK033357	Mus musculus 16 days embryo lung cDNA, RIKEN full-length enriched library, clone:8430403D15 product:unclassifiable, full insert sequence [AK033357]
A_52_P216600	2.4506	Epb4.9	NM_013514	Mus musculus erythrocyte protein band 4.9 (Epb4.9), mRNA [NM_013514]
A_52_P891860	2.4494	AK038048	AK038048	Mus musculus 16 days neonate thymus cDNA, RIKEN full-length enriched library, clone:A130074A12 product:unclassifiable, full insert sequence. [AK038048]
A_51_P421680	2.44732	Zfp383	BC064456	Mus musculus zinc finger protein 383, mRNA (cDNA clone IMAGE:6813023) [BC064456]
A_51_P196605	2.44519	Pink1	NM_026880	Mus musculus PTEN induced putative kinase 1 (Pink1), mRNA [NM_026880]
A_51_P205545	2.44363	Creld1	NM_133930	Mus musculus cysteine-rich with EGF-like domains 1 (Creld1), mRNA [NM_133930]
A_51_P271529	2.44271	BB303627	BB303627	BB303627 RIKEN full-length enriched, adult male corpora quadrigemina Mus musculus cDNA clone B230105G10 3'. [BB303627]
A_51_P240903	2.44055	Tns1	BC055076	Mus musculus tensin 1, mRNA (cDNA clone IMAGE:30055111), complete cds. [BC055076]
A_52_P207151	2.44018	Rnf111	NM_033604	Mus musculus ring finger 111 (Rnf111), mRNA [NM_033604]
A_51_P199168	2.43775	Cidea	NM_007702	Mus musculus cell death-inducing DNA fragmentation factor, alpha subunit-like effector A (Cidea), mRNA [NM_007702]
A_52_P619262	2.43439	Mical3	AK122497	Mus musculus mRNA for mKIAA1364 protein [AK122497]
A_52_P350344	2.43313	Timm8a2	NM_001037744	Mus musculus translocase of inner mitochondrial membrane 8 homolog a2 (yeast) (Timm8a2), mRNA [NM_001037744]
A_52_P582858	2.42955	Dgkd	BC048957	Mus musculus diacylglycerol kinase, delta, mRNA (cDNA clone IMAGE:6490713), complete cds. [BC048957]
A_51_P224872	2.42822	Syne2	NM_001005510	Mus musculus synaptic nuclear envelope 2 (Syne2), mRNA [NM_001005510]
A_52_P439694	2.42808	Pcdh17	AK133637	Mus musculus adult male pituitary gland cDNA, RIKEN full-length enriched library, clone:5330423H24 product:hypothetical protein, full insert sequence. [AK133637]
A_51_P401974	2.42752	Enpp2	NM_015744	Mus musculus ectonucleotide pyrophosphatase/phosphodiesterase 2 (Enpp2), mRNA [NM_015744]
A_52_P483105	2.42705	Lpin1	NM_015763	Mus musculus lipin 1 (Lpin1), transcript variant 2, mRNA [NM_015763]
A_51_P215475	2.42406	Ptprb	NM_029928	Mus musculus protein tyrosine phosphatase, receptor type, B (Ptprb), mRNA [NM_029928]
A_51_P264673	2.42365	Prlr	AK083198	Mus musculus adult male hippocampus cDNA, RIKEN full-length enriched library, clone:C630026G18 product:unclassifiable, full insert sequence [AK083198]
A_52_P164136	2.42304	Arrdc3	NM_001042591	Mus musculus arrestin domain containing 3 (Arrdc3), mRNA [NM_001042591]
A_52_P236240	2.42271	4933409F18Rik	AK015322	Mus musculus adult male testis cDNA, RIKEN full-length enriched library, clone:4930435E18 product:unclassifiable, full insert sequence [AK015322]
A_52_P1020860	2.42183	AW112010	AK153119	Mus musculus bone marrow macrophage cDNA, RIKEN full-length enriched library, clone:I830123K04 product:hypothetical protein, full insert sequence. [AK153119]
A_52_P662796	2.42007	Dennd2d	NM_028110	Mus musculus DENN/MADD domain containing 2D (Dennd2d), mRNA [NM_028110]
A_51_P392943	2.4186	AB112350	NM_178728	Mus musculus cDNA sequence AB112350 (AB112350), mRNA [NM_178728]
A_51_P400463	2.41855	Agmat	NM_001081408	Mus musculus agmatine ureohydrolase (agmatinase) (Agmat), mRNA [NM_001081408]
A_52_P410245	2.41683	Olfr90	NM_146477	Mus musculus olfactory receptor 90 (Olfr90), mRNA [NM_146477]
A_51_P124126	2.41675	Cyp2d22	NM_019823	Mus musculus cytochrome P450, family 2, subfamily d, polypeptide 22 (Cyp2d22), mRNA [NM_019823]
A_51_P264227	2.41581	Gpr160	AK154784	Mus musculus NOD-derived CD11c +ve dendritic cells cDNA, RIKEN full-length enriched library, clone:F630106L08 product:G protein-coupled receptor 160, full insert sequence. [AK154784]
A_52_P1197466	2.41441	A_52_P1197466
A_52_P299115	2.41278	Aco1	NM_007386	Mus musculus aconitase 1 (Aco1), mRNA [NM_007386]
A_52_P639765	2.41145	Btbd16	NM_001081038	Mus musculus BTB (POZ) domain containing 16 (Btbd16), mRNA [NM_001081038]
A_51_P439412	2.41087	NAP057235-1
A_51_P519811	2.41063	Sult1c1	NM_018751	Mus musculus sulfotransferase family, cytosolic, 1C, member 1 (Sult1c1), mRNA [NM_018751]
A_52_P213909	2.4083	Hbb-b1	NM_008220	Mus musculus hemoglobin, beta adult major chain (Hbb-b1), mRNA [NM_008220]
A_52_P188593	2.4066	Gm447	NM_001007590	Mus musculus gene model 447, (NCBI) (Gm447), mRNA [NM_001007590]
A_52_P621860	2.40578	Tbpl2	NM_199059	Mus musculus TATA box binding protein like 2 (Tbpl2), mRNA [NM_199059]
A_52_P135990	2.40452	4921521F21Rik	NM_027582	Mus musculus RIKEN cDNA 4921521F21 gene (4921521F21Rik), mRNA [NM_027582]
A_51_P276787	2.40441	1700018B24Rik		RIKEN cDNA 1700018B24 gene [Source:MarkerSymbol;Acc:MGI:1913582] [ENSMUST00000036023]
A_52_P488092	2.40302	Etl4	NM_001081006	Mus musculus enhancer trap locus 4 (Etl4), mRNA [NM_001081006]
A_52_P276840	2.40266	Atp9a	NM_015731	Mus musculus ATPase, class II, type 9A (Atp9a), mRNA [NM_015731]
A_52_P389484	2.40082	Pag1	AK041695	Mus musculus 3 days neonate thymus cDNA, RIKEN full-length enriched library, clone:A630030J17 product:unclassifiable, full insert sequence. [AK041695]
A_52_P85903	2.39728	Chrna9	NM_001081104	Mus musculus cholinergic receptor, nicotinic, alpha polypeptide 9 (Chrna9), mRNA [NM_001081104]
A_51_P486943	2.39648	Ctdspl	NM_133710	Mus musculus CTD (carboxy-terminal domain, RNA polymerase II, polypeptide A) small phosphatase-like (Ctdspl), mRNA [NM_133710]
A_51_P512072	2.39504	Alad	NM_008525	Mus musculus aminolevulinate, delta-, dehydratase (Alad), mRNA [NM_008525]
A_51_P413995	2.395	Zfp422-rs1	AK032339	Mus musculus adult male olfactory brain cDNA, RIKEN full-length enriched library, clone:6430521J03 product:hypothetical KRAB box containing protein, full insert sequence. [AK032339]
A_52_P590396	2.39478	Sort1	NM_019972	Mus musculus sortilin 1 (Sort1), mRNA [NM_019972]
A_52_P1367	2.39366	AK162987	AK162987	Mus musculus 0 day neonate thymus cDNA, RIKEN full-length enriched library, clone:A430024O18 product:unclassifiable, full insert sequence. [AK162987]
A_51_P411061	2.39221	Lama5	NM_001081171	Mus musculus laminin, alpha 5 (Lama5), mRNA [NM_001081171]
A_51_P470966	2.39153	Zfp472	NM_153063	Mus musculus zinc finger protein 472 (Zfp472), mRNA [NM_153063]
A_51_P404815	2.39137	Apol6	AK010208	Mus musculus adult male tongue cDNA, RIKEN full-length enriched library, clone:2310076O14 product:hypothetical Bacterial regulatory protein, LysR family containing protein, full insert sequence. [AK010208]
A_51_P248786	2.39135	Ccdc80	NM_026439	Mus musculus coiled-coil domain containing 80 (Ccdc80), mRNA [NM_026439]
A_51_P332217	2.38971	Ushbp1	NM_181418	Mus musculus Usher syndrome 1C binding protein 1 (Ushbp1), mRNA [NM_181418]
A_51_P128973	2.38479	Apoa2	NM_013474	Mus musculus apolipoprotein A-II (Apoa2), mRNA [NM_013474]
A_52_P194531	2.38427	TC1644926
A_51_P368394	2.38166	Dnajb8	NM_019964	Mus musculus DnaJ (Hsp40) homolog, subfamily B, member 8 (Dnajb8), mRNA [NM_019964]
A_51_P212958	2.37923	Psors1c2	NM_020576	Mus musculus psoriasis susceptibility 1 candidate 2 (human) (Psors1c2), mRNA [NM_020576]
A_52_P469782	2.37919	Als2cl	NM_146228	Mus musculus ALS2 C-terminal like (Als2cl), mRNA [NM_146228]
A_52_P1075773	2.37873	9930024M15Rik	AK036921	Mus musculus adult female vagina cDNA, RIKEN full-length enriched library, clone:9930024M15 product:unclassifiable, full insert sequence. [AK036921]
A_51_P518001	2.3787	Creb3l3	NM_145365	Mus musculus cAMP responsive element binding protein 3-like 3 (Creb3l3), mRNA [NM_145365]
A_51_P287001	2.3779	Fxyd1	NM_019503	Mus musculus FXYD domain-containing ion transport regulator 1 (Fxyd1), transcript variant 1, mRNA [NM_019503]
A_51_P128283	2.37445	Sdk2	AK030591	Mus musculus adult male pituitary gland cDNA, RIKEN full-length enriched library, clone:5330435L01 product:hypothetical Immunoglobulin-like/Immunoglobulin C-2 type/Immunoglobulin subtype/Ig-like domain profile containing protein, full insert sequence....
A_51_P128056	2.37299	Olfr415	NM_146714	Mus musculus olfactory receptor 415 (Olfr415), mRNA [NM_146714]
A_52_P91527	2.37262	Sept1	NM_017461	Mus musculus septin 1 (Sept1), mRNA [NM_017461]
A_52_P144818	2.37178	Ppp1r1a	NM_021391	Mus musculus protein phosphatase 1, regulatory (inhibitor) subunit 1A (Ppp1r1a), mRNA [NM_021391]
A_51_P325198	2.37014	3110009E18Rik	BY713029	BY713029 RIKEN full-length enriched, 13 days embryo head Mus musculus cDNA clone 3110009E18 5'. [BY713029]
A_52_P248013	2.36969	4833446K15Rik	NM_001081328	Mus musculus RIKEN cDNA 4833446K15 gene (4833446K15Rik), mRNA [NM_001081328]
A_52_P217710	2.36839	Fzd6	NM_008056	Mus musculus frizzled homolog 6 (Drosophila) (Fzd6), mRNA [NM_008056]
A_52_P385006	2.36798	BC050196	NM_201374	Mus musculus cDNA sequence BC050196 (BC050196), mRNA [NM_201374]
A_52_P313217	2.36784	Gpr133	NM_001081342	Mus musculus G protein-coupled receptor 133 (Gpr133), mRNA [NM_001081342]
A_51_P215038	2.36749	Tmem59l	NM_182991	Mus musculus transmembrane protein 59-like (Tmem59l), mRNA [NM_182991]
A_52_P609319	2.36624	Nrip1	AK020076	Mus musculus 13 days embryo male testis cDNA, RIKEN full-length enriched library, clone:6030458L20 product:unclassifiable, full insert sequence. [AK020076]
A_52_P295225	2.36595	Txndc3	NM_181591	Mus musculus thioredoxin domain containing 3 (spermatozoa) (Txndc3), mRNA [NM_181591]
A_52_P208681	2.36521	Hba-a2	M10466	Mouse alpha-globin mRNA. [M10466]
A_51_P421724	2.36355	St6galnac5	NM_012028	Mus musculus ST6 (alpha-N-acetyl-neuraminyl-2,3-beta-galactosyl-1,3)-N-acetylgalactosaminide alpha-2,6-sialyltransferase 5 (St6galnac5), mRNA [NM_012028]
A_52_P174525	2.36308	Epb4.1	BC017137	Mus musculus erythrocyte protein band 4.1, mRNA (cDNA clone IMAGE:4482128), complete cds. [BC017137]
A_52_P859153	2.36145	Tcf12	AK169800	Mus musculus 2 days neonate thymus thymic cells cDNA, RIKEN full-length enriched library, clone:E430024M04 product:transcription factor 12, full insert sequence. [AK169800]
A_52_P128906	2.35989	Zfp787	AK006810	Mus musculus adult male testis cDNA, RIKEN full-length enriched library, clone:1700056E03 product:weakly similar to TTF-I INTERACTING PEPTIDE 20 (FRAGMENT) [Homo sapiens], full insert sequence. [AK006810]
A_51_P342835	2.3593	Tmem24	NM_027909	Mus musculus transmembrane protein 24 (Tmem24), mRNA [NM_027909]
A_51_P199425	2.35801	Glcci1	NM_133236	Mus musculus glucocorticoid induced transcript 1 (Glcci1), transcript variant 1, mRNA [NM_133236]
A_51_P115005	2.35797	Edn1	NM_010104	Mus musculus endothelin 1 (Edn1), mRNA [NM_010104]
A_51_P146560	2.3578	Msln	NM_018857	Mus musculus mesothelin (Msln), mRNA [NM_018857]
A_51_P187842	2.35758	Eif4e3	NM_025829	Mus musculus eukaryotic translation initiation factor 4E member 3 (Eif4e3), mRNA [NM_025829]
A_52_P506316	2.35754	Fbxo8	NM_015791	Mus musculus F-box protein 8 (Fbxo8), mRNA [NM_015791]
A_52_P313185	2.35561	Sv2b	NM_153579	Mus musculus synaptic vesicle glycoprotein 2 b (Sv2b), mRNA [NM_153579]
A_52_P27713	2.35557	C230088H06Rik	AK082693	Mus musculus 0 day neonate cerebellum cDNA, RIKEN full-length enriched library, clone:C230088H06 product:unclassifiable, full insert sequence. [AK082693]
A_52_P166330	2.35523	Upk1a	NM_026815	Mus musculus uroplakin 1A (Upk1a), mRNA [NM_026815]
A_52_P380379	2.35495	Ucp3	NM_009464	Mus musculus uncoupling protein 3 (mitochondrial, proton carrier) (Ucp3), mRNA [NM_009464]
A_51_P357983	2.35489	Sin3b	NM_009188	Mus musculus transcriptional regulator, SIN3B (yeast) (Sin3b), mRNA [NM_009188]
A_52_P121502	2.35395	Pllp	NM_026385	Mus musculus plasma membrane proteolipid (Pllp), mRNA [NM_026385]
A_52_P483885	2.35284	4930455C21Rik	AK078465	Mus musculus 12 days embryo male wolffian duct includes surrounding region cDNA, RIKEN full-length enriched library, clone:6720489N21 product:hypothetical protein, full insert sequence. [AK078465]
A_51_P359137	2.35027	Doc2g	NM_021791	Mus musculus double C2, gamma (Doc2g), mRNA [NM_021791]
A_52_P204629	2.3493	Nova1	XM_973725	PREDICTED: Mus musculus similar to neuro-oncological ventral antigen 1 isoform 2, transcript variant 3 (LOC664883), mRNA [XM_973725]
A_51_P314397	2.34677	Crip2	NM_024223	Mus musculus cysteine rich protein 2 (Crip2), mRNA [NM_024223]
A_51_P242400	2.34546	Krt8	NM_031170	Mus musculus keratin 8 (Krt8), mRNA [NM_031170]
A_51_P294059	2.34419	Gpr81	NM_175520	Mus musculus G protein-coupled receptor 81 (Gpr81), mRNA [NM_175520]
A_51_P278887	2.34307	Hint2	NM_026871	Mus musculus histidine triad nucleotide binding protein 2 (Hint2), mRNA [NM_026871]
A_51_P231308	2.34217	Mfng	NM_008595	Mus musculus manic fringe homolog (Drosophila) (Mfng), mRNA [NM_008595]
A_52_P518808	2.34184	LOC676546	XM_990990	PREDICTED: Mus musculus similar to monocyte to macrophage differentiation-associated (LOC676546), mRNA [XM_990990]
A_52_P330314	2.34175	Lmo4	AK033097	Mus musculus 15 days embryo male testis cDNA, RIKEN full-length enriched library, clone:8030411F07 product:LIM only 4, full insert sequence [AK033097]
A_51_P181448	2.34045	Bcat2	NM_009737	Mus musculus branched chain aminotransferase 2, mitochondrial (Bcat2), mRNA [NM_009737]
A_52_P66833	2.34012	NAP057310-1
A_51_P454707	2.33984	Tbc1d2	AK041359	Mus musculus 3 days neonate thymus cDNA, RIKEN full-length enriched library, clone:A630005A06 product:hypothetical Pleckstrin homology (PH) domain containing protein, full insert sequence. [AK041359]
A_51_P379318	2.3398	Olfr127	NM_146377	Mus musculus olfactory receptor 127 (Olfr127), mRNA [NM_146377]
A_52_P367882	2.3387	Rfx3	NM_011265	Mus musculus regulatory factor X, 3 (influences HLA class II expression) (Rfx3), mRNA [NM_011265]
A_52_P661606	2.33733	Phgdh	NM_016966	Mus musculus 3-phosphoglycerate dehydrogenase (Phgdh), mRNA [NM_016966]
A_51_P280766	2.33692	Ccdc108	AK046272	Mus musculus adult male corpora quadrigemina cDNA, RIKEN full-length enriched library, clone:B230363K08 product:hypothetical PapD-like structure containing protein, full insert sequence. [AK046272]
A_52_P281145	2.33686	Ankrd38	NM_172872	Mus musculus ankyrin repeat domain 38 (Ankrd38), mRNA [NM_172872]
A_52_P676510	2.33607	Tgtp	NM_011579	Mus musculus T-cell specific GTPase (Tgtp), mRNA [NM_011579]
A_51_P112476	2.33464	AI840334	AI840334	AI840334 UI-M-AJ0-abd-d-05-0-UI.s2 NIH_BMAP_MOB Mus musculus cDNA clone UI-M-AJ0-abd-d-05-0-UI 3', mRNA sequence [AI840334]
A_51_P137029	2.33383	Plce1	NM_019588	Mus musculus phospholipase C, epsilon 1 (Plce1), mRNA [NM_019588]
A_52_P107290	2.33359	Auh	AK147855	Mus musculus melanocyte cDNA, RIKEN full-length enriched library, clone:G270069K09 product:AU RNA binding protein [AK147855]
A_51_P475378	2.33324	Echdc3	NM_024208	Mus musculus enoyl Coenzyme A hydratase domain containing 3 (Echdc3), mRNA [NM_024208]
A_51_P468456	2.33137	S100a3	NM_011310	Mus musculus S100 calcium binding protein A3 (S100a3), mRNA [NM_011310]
A_51_P490678	2.33073	Trim68	NM_198012	Mus musculus tripartite motif containing 68 (Trim68), mRNA [NM_198012]
A_52_P284156	2.3291	NAP070124-1
A_51_P306731	2.32777	A230097K15Rik	NM_172715	Mus musculus RIKEN cDNA A230097K15 gene (A230097K15Rik), transcript variant 1, mRNA [NM_172715]
A_52_P257812	2.32768	Lpl	NM_008509	Mus musculus lipoprotein lipase (Lpl), mRNA [NM_008509]
A_51_P268563	2.32736	Eng	NM_007932	Mus musculus endoglin (Eng), mRNA [NM_007932]
A_51_P229869	2.32646	Grin2b	NM_008171	Mus musculus glutamate receptor, ionotropic, NMDA2B (epsilon 2) (Grin2b), mRNA [NM_008171]
A_51_P305811	2.32605	1700021A07Rik	AK006189	Mus musculus adult male testis cDNA, RIKEN full-length enriched library, clone:1700021A07 product:hypothetical protein, full insert sequence. [AK006189]
A_52_P285470	2.32571	Lrp2	NM_001081088	Mus musculus low density lipoprotein receptor-related protein 2 (Lrp2), mRNA [NM_001081088]
A_51_P466148	2.3257	Bckdha	NM_007533	Mus musculus branched chain ketoacid dehydrogenase E1, alpha polypeptide (Bckdha), mRNA [NM_007533]
A_51_P338705	2.32566	Ankrd15	NM_181404	Mus musculus ankyrin repeat domain 15 (Ankrd15), mRNA [NM_181404]
A_51_P173735	2.32461	Dock11	NM_001009947	Mus musculus dedicator of cytokinesis 11 (Dock11), mRNA [NM_001009947]
A_51_P322941	2.32361	Dok7	NM_172708	Mus musculus docking protein 7 (Dok7), mRNA [NM_172708]
A_52_P489778	2.32303	Ablim1	AK154082	Mus musculus 2 days neonate thymus thymic cells cDNA, RIKEN full-length enriched library, clone:E430037I09 product:actin-binding LIM protein 1, full insert sequence. [AK154082]
A_52_P639402	2.32196	Kcnk3	NM_010608	Mus musculus potassium channel, subfamily K, member 3 (Kcnk3), mRNA [NM_010608]
A_52_P542710	2.32193	2700029M09Rik	AK082094	Mus musculus 0 day neonate cerebellum cDNA, RIKEN full-length enriched library, clone:C230006B22 product:unclassifiable, full insert sequence. [AK082094]
A_51_P370975	2.32152	Ptp4a1	NM_011200	Mus musculus protein tyrosine phosphatase 4a1 (Ptp4a1), mRNA [NM_011200]
A_51_P247249	2.31907	Alox5	NM_009662	Mus musculus arachidonate 5-lipoxygenase (Alox5), mRNA [NM_009662]
A_52_P333529	2.31635	Slco2a1	NM_033314	Mus musculus solute carrier organic anion transporter family, member 2a1 (Slco2a1), mRNA [NM_033314]
A_52_P835520	2.31632	AK054225	AK054225	Mus musculus 2 days pregnant adult female oviduct cDNA, RIKEN full-length enriched library, clone:E230034O05 product:unclassifiable, full insert sequence [AK054225]
A_51_P500984	2.31575	Gadd45b	NM_008655	Mus musculus growth arrest and DNA-damage-inducible 45 beta (Gadd45b), mRNA [NM_008655]
A_51_P220150	2.31537	Angptl7	NM_001039554	Mus musculus angiopoietin-like 7 (Angptl7), mRNA [NM_001039554]
A_51_P296036	2.31271	Nrbp2	NM_144847	Mus musculus nuclear receptor binding protein 2 (Nrbp2), mRNA [NM_144847]
A_52_P383653	2.31076	Cpne8	NM_025815	Mus musculus copine VIII (Cpne8), transcript variant 1, mRNA [NM_025815]
A_51_P516860	2.31076	Rapgef5	AK122234	Mus musculus mRNA for mKIAA0277 protein [AK122234]
A_51_P448856	2.31026	Elf4	NM_019680	Mus musculus E74-like factor 4 (ets domain transcription factor) (Elf4), mRNA [NM_019680]
A_51_P370996	2.30874	Ptprz1	AJ133130	Mus musculus mRNA for DSD-1-proteoglycan. [AJ133130]
A_51_P378550	2.30841	Oplah	NM_153122	Mus musculus 5-oxoprolinase (ATP-hydrolysing) (Oplah), mRNA [NM_153122]
A_52_P557360	2.30729	C130038G02Rik	NM_029920	Mus musculus RIKEN cDNA C130038G02 gene (C130038G02Rik), transcript variant 2, mRNA [NM_029920]
A_52_P13389	2.30697	Myct1	NM_026793	Mus musculus myc target 1 (Myct1), mRNA [NM_026793]
A_51_P112932	2.30558	Entpd2	NM_009849	Mus musculus ectonucleoside triphosphate diphosphohydrolase 2 (Entpd2), mRNA [NM_009849]
A_52_P121978	2.30263	TC1637709
A_52_P148184	2.30234	1600014C10Rik	NM_028166	Mus musculus RIKEN cDNA 1600014C10 gene (1600014C10Rik), transcript variant 2, mRNA [NM_028166]
A_51_P249118	2.30139	Abcb4	NM_008830	Mus musculus ATP-binding cassette, sub-family B (MDR/TAP), member 4 (Abcb4), mRNA [NM_008830]
A_52_P218955	2.2999	D3Ertd751e	AK012700	Mus musculus 10, 11 days embryo whole body cDNA, RIKEN full-length enriched library, clone:2810009O15 product:hypothetical protein, full insert sequence. [AK012700]
A_52_P453884	2.29972	Foxo1	NM_019739	Mus musculus forkhead box O1 (Foxo1), mRNA [NM_019739]
A_51_P514139	2.29971	Prdm16	NM_027504	Mus musculus PR domain containing 16 (Prdm16), mRNA [NM_027504]
A_51_P367530	2.29951	Syt6	NM_018800	Mus musculus synaptotagmin VI (Syt6), mRNA [NM_018800]
A_52_P182919	2.29928	Steap4	NM_054098	Mus musculus STEAP family member 4 (Steap4), mRNA [NM_054098]
A_52_P266712	2.29887	4732418C07Rik	AK028740	Mus musculus 10 days neonate skin cDNA, RIKEN full-length enriched library, clone:4732450G04 product:hypothetical protein, full insert sequence. [AK028740]
A_52_P23225	2.29886	Gpc3	NM_016697	Mus musculus glypican 3 (Gpc3), mRNA [NM_016697]
A_51_P338183	2.29881	ENSMUSG00000053118	AK052874	Mus musculus 16 days neonate heart cDNA, RIKEN full-length enriched library, clone:D830015G02 product:hypothetical Leucine-rich region containing protein, full insert sequence. [AK052874]
A_52_P335064	2.29866	Mustn1	NM_181390	Mus musculus musculoskeletal, embryonic nuclear protein 1 (Mustn1), mRNA [NM_181390]
A_51_P207921	2.2982	Por	NM_008898	Mus musculus P450 (cytochrome) oxidoreductase (Por), mRNA [NM_008898]
A_52_P642626	2.29819	Rbm20	XM_001002314	PREDICTED: Mus musculus RIKEN cDNA 1110018J23 gene (1110018J23Rik), mRNA [XM_001002314]
A_51_P157802	2.29765	Hrasls5	NM_025731	Mus musculus HRAS-like suppressor family, member 5 (Hrasls5), mRNA [NM_025731]
A_52_P328440	2.29749	ENSMUST00000098050		similar to Major urinary protein 4 precursor (MUP 4) (LOC673931), mRNA [Source:RefSeq_dna;Acc:XR_004392] [ENSMUST00000098050]
A_51_P433540	2.29681	Plekhn1	NM_001008233	Mus musculus pleckstrin homology domain containing, family N member 1 (Plekhn1), mRNA [NM_001008233]
A_51_P460869	2.29592	Prkag2	NM_145401	Mus musculus protein kinase, AMP-activated, gamma 2 non-catalytic subunit (Prkag2), mRNA [NM_145401]
A_51_P157112	2.29408	Serpina3c	NM_008458	Mus musculus serine (or cysteine) peptidase inhibitor, clade A, member 3C (Serpina3c), mRNA [NM_008458]
A_52_P2800	2.28852	Aifm2	NM_153779	Mus musculus apoptosis-inducing factor, mitochondrion-associated 2 (Aifm2), transcript variant 1, mRNA [NM_153779]
A_51_P280519	2.28809	1110031I02Rik	NM_025402	Mus musculus RIKEN cDNA 1110031I02 gene (1110031I02Rik), mRNA [NM_025402]
A_52_P43578	2.28779	D130017N08Rik	AK046914	Mus musculus 10 days neonate cerebellum cDNA, RIKEN full-length enriched library, clone:B930002F20 product:unclassifiable, full insert sequence. [AK046914]
A_51_P290819	2.28733	Hint3	NM_025798	Mus musculus histidine triad nucleotide binding protein 3 (Hint3), mRNA [NM_025798]
A_52_P345539	2.28681	Uty	NM_009484	Mus musculus ubiquitously transcribed tetratricopeptide repeat gene, Y chromosome (Uty), mRNA [NM_009484]
A_51_P412579	2.28565	Tmem182	AK010233	Mus musculus adult male tongue cDNA, RIKEN full-length enriched library, clone:2310079P10 product:unclassifiable, full insert sequence [AK010233]
A_52_P681659	2.2837	Mtap9	NM_001081230	Mus musculus microtubule-associated protein 9 (Mtap9), mRNA [NM_001081230]
A_52_P265996	2.28287	Odz4	AK031375	Mus musculus 13 days embryo male testis cDNA, RIKEN full-length enriched library, clone:6030416D17 product:odd Oz/ten-m homolog 4 (Drosophila), full insert sequence. [AK031375]
A_52_P662860	2.28196	Olfr701		olfactory receptor 701 [Source:MarkerSymbol;Acc:MGI:3030535] [ENSMUST00000069682]
A_52_P510680	2.2812	AK086766	AK086766	Mus musculus 15 days embryo head cDNA, RIKEN full-length enriched library, clone:D930050F02 product:unclassifiable, full insert sequence. [AK086766]
A_52_P215207	2.28003	A630077J23Rik	AK042273	Mus musculus 3 days neonate thymus cDNA, RIKEN full-length enriched library, clone:A630077J23 product:unclassifiable, full insert sequence [AK042273]
A_51_P163906	2.2791	Tln2	NM_001081242	Mus musculus talin 2 (Tln2), mRNA [NM_001081242]
A_51_P503560	2.27876	AK085010	AK085010	Mus musculus 13 days embryo lung cDNA, RIKEN full-length enriched library, clone:D430024B17 product:unclassifiable, full insert sequence. [AK085010]
A_51_P159803	2.27766	Nrg4	NM_032002	Mus musculus neuregulin 4 (Nrg4), mRNA [NM_032002]
A_52_P277604	2.2776	Btnl9	NM_172793	Mus musculus butyrophilin-like 9 (Btnl9), mRNA [NM_172793]
A_51_P221651	2.27716	Cabc1	NM_023341	Mus musculus chaperone, ABC1 activity of bc1 complex like (S. pombe) (Cabc1), mRNA [NM_023341]
A_52_P16877	2.27677	Tmcc3	NM_172051	Mus musculus transmembrane and coiled coil domains 3 (Tmcc3), mRNA [NM_172051]
A_51_P139651	2.27669	Nos3	NM_008713	Mus musculus nitric oxide synthase 3, endothelial cell (Nos3), mRNA [NM_008713]
A_51_P179103	2.2754	Tshr	NM_011648	Mus musculus thyroid stimulating hormone receptor (Tshr), mRNA [NM_011648]
A_51_P185906	2.27428	Abi3	NM_025659	Mus musculus ABI gene family, member 3 (Abi3), mRNA [NM_025659]
A_52_P420734	2.27398	Rasgrp2	BC051474	Mus musculus RAS, guanyl releasing protein 2, mRNA (cDNA clone IMAGE:1179744), complete cds. [BC051474]
A_51_P248986	2.27128	Hrnr	AY027660	Mus musculus hornerin mRNA, complete cds [AY027660]
A_52_P517063	2.27084	Immp2l	NM_053122	Mus musculus IMP2 inner mitochondrial membrane peptidase-like (S. cerevisiae) (Immp2l), mRNA [NM_053122]
A_51_P249821	2.27054	Smap1	AK006817	Mus musculus adult male testis cDNA, RIKEN full-length enriched library, clone:1700056O10 product:similar to STROMAL MEMBRANE-ASSOCIATED PROTEIN SMAP1A [Homo sapiens], full insert sequence. [AK006817]
A_51_P309184	2.26839	Pxmp2	NM_008993	Mus musculus peroxisomal membrane protein 2 (Pxmp2), mRNA [NM_008993]
A_51_P459944	2.26794	Tcf21	NM_011545	Mus musculus transcription factor 21 (Tcf21), mRNA [NM_011545]
A_52_P247086	2.26786	4930535B03Rik	AK154692	Mus musculus NOD-derived CD11c +ve dendritic cells cDNA, RIKEN full-length enriched library, clone:F630103I02 product:Hypothetical serine-rich region containing protein homolog [Mus musculus], full insert sequence. [AK154692]
A_52_P595124	2.26686	Acaca	NM_133360	Mus musculus acetyl-Coenzyme A carboxylase alpha (Acaca), mRNA [NM_133360]
A_51_P455416	2.26669	Mapk12	NM_013871	Mus musculus mitogen-activated protein kinase 12 (Mapk12), mRNA [NM_013871]
A_52_P388163	2.26573	2210010L05Rik	NM_178081	Mus musculus RIKEN cDNA 2210010L05 gene (2210010L05Rik), transcript variant 2, mRNA [NM_178081]
A_51_P246924	2.26359	2700055K07Rik	NM_026481	Mus musculus RIKEN cDNA 2700055K07 gene (2700055K07Rik), mRNA [NM_026481]
A_51_P256246	2.26265	Tspan13	NM_025359	Mus musculus tetraspanin 13 (Tspan13), mRNA [NM_025359]
A_52_P15073	2.26163	4833442J19Rik	NM_177101	Mus musculus RIKEN cDNA 4833442J19 gene (4833442J19Rik), mRNA [NM_177101]
A_51_P256665	2.2615	Pon3	NM_173006	Mus musculus paraoxonase 3 (Pon3), mRNA [NM_173006]
A_51_P209930	2.26145	Rtn2	NM_013648	Mus musculus reticulon 2 (Z-band associated protein) (Rtn2), transcript variant B, mRNA [NM_013648]
A_52_P544476	2.25937	Terc	NR_001579	Mus musculus telomerase RNA component (Terc) on chromosome 3 [NR_001579]
A_52_P1135722	2.25922	Gm684	XM_196479	PREDICTED: Mus musculus gene model 684, (NCBI) (LOC270157), mRNA [XM_196479]
A_51_P282993	2.25823	4930415F15Rik	AK015144	Mus musculus adult male testis cDNA, RIKEN full-length enriched library, clone:4930415F15 product:hypothetical protein, full insert sequence. [AK015144]
A_52_P160209	2.25822	Sh3glb2	NM_139302	Mus musculus SH3-domain GRB2-like endophilin B2 (Sh3glb2), mRNA [NM_139302]
A_51_P297647	2.25804	Sh3glb2	NM_139302	Mus musculus SH3-domain GRB2-like endophilin B2 (Sh3glb2), mRNA [NM_139302]
A_51_P138044	2.25727	Foxo1	NM_019739	Mus musculus forkhead box O1 (Foxo1), mRNA [NM_019739]
A_52_P100252	2.25727	Fasn	NM_007988	Mus musculus fatty acid synthase (Fasn), mRNA [NM_007988]
A_52_P770459	2.25715	4930452L02Rik	AK015448	Mus musculus adult male testis cDNA, RIKEN full-length enriched library, clone:4930452L02 product:unclassifiable, full insert sequence. [AK015448]
A_51_P221062	2.25706	Prkar2b	NM_011158	Mus musculus protein kinase, cAMP dependent regulatory, type II beta (Prkar2b), mRNA [NM_011158]
A_52_P260954	2.25493	Ric3	NM_001038624	Mus musculus resistance to inhibitors of cholinesterase 3 homolog (C. elegans) (Ric3), transcript variant 1, mRNA [NM_001038624]
A_51_P201237	2.25396	Larp2	NM_001040399	Mus musculus La ribonucleoprotein domain family, member 2 (Larp2), mRNA [NM_001040399]
A_51_P378063	2.25196	Aqp7	AB010100	Mus musculus mRNA for aquaporin 7, complete cds. [AB010100]
A_51_P133105	2.25139	8430416G17Rik	AK018420	Mus musculus 16 days embryo lung cDNA, RIKEN full-length enriched library, clone:8430416G17 product:unclassifiable, full insert sequence. [AK018420]
A_51_P307954	2.2513	Epas1	NM_010137	Mus musculus endothelial PAS domain protein 1 (Epas1), mRNA [NM_010137]
A_52_P448266	2.25125	Bcat2	NM_009737	Mus musculus branched chain aminotransferase 2, mitochondrial (Bcat2), mRNA [NM_009737]
A_52_P586865	2.25081	Afap1l1	NM_178928	Mus musculus actin filament associated protein 1-like 1 (Afap1l1), mRNA [NM_178928]
A_51_P375693	2.24939	Tmem135	NM_028343	Mus musculus transmembrane protein 135 (Tmem135), mRNA [NM_028343]
A_52_P617638	2.24913	Nox4	NM_015760	Mus musculus NADPH oxidase 4 (Nox4), mRNA [NM_015760]
A_51_P261648	2.24891	Olfr1507	NM_020512	Mus musculus olfactory receptor 1507 (Olfr1507), mRNA [NM_020512]
A_52_P544523	2.24837	Myl4	NM_010858	Mus musculus myosin, light polypeptide 4 (Myl4), mRNA [NM_010858]
A_52_P569348	2.24612	Dbt	NM_010022	Mus musculus dihydrolipoamide branched chain transacylase E2 (Dbt), mRNA [NM_010022]
A_52_P350664	2.24523	Pygb	NM_153781	Mus musculus brain glycogen phosphorylase (Pygb), mRNA [NM_153781]
A_51_P159225	2.24471	Kcnj15	AF085696	Mus musculus inward rectifier K+ channel Kir4.2 mRNA, complete cds. [AF085696]
A_51_P187491	2.24444	Epgn	NM_053087	Mus musculus epithelial mitogen (Epgn), mRNA [NM_053087]
A_52_P499625	2.2443	Exoc4	AK039983	Mus musculus 0 day neonate thymus cDNA, RIKEN full-length enriched library, clone:A430039L15 product:SEC8 (S. cerevisiae), full insert sequence. [AK039983]
A_51_P387437	2.24379	Sbsn	NM_172205	Mus musculus suprabasin (Sbsn), transcript variant 1, mRNA [NM_172205]
A_51_P234944	2.24347	Adamts4	NM_172845	Mus musculus a disintegrin-like and metallopeptidase (reprolysin type) with thrombospondin type 1 motif, 4 (Adamts4), mRNA [NM_172845]
A_51_P474053	2.24299	1600014E20Rik	AK005451	Mus musculus adult female placenta cDNA, RIKEN full-length enriched library, clone:1600014E20 product:hypothetical protein, full insert sequence [AK005451]
A_52_P516034	2.24296	Ptp4a1	NM_011200	Mus musculus protein tyrosine phosphatase 4a1 (Ptp4a1), mRNA [NM_011200]
A_51_P419270	2.24291	Dnajc5b	NM_025489	Mus musculus DnaJ (Hsp40) homolog, subfamily C, member 5 beta (Dnajc5b), mRNA [NM_025489]
A_52_P417825	2.24192	Osgin2	NM_145950	Mus musculus oxidative stress induced growth inhibitor family member 2 (Osgin2), mRNA [NM_145950]
A_52_P281941	2.24081	Zdhhc2	NM_178395	Mus musculus zinc finger, DHHC domain containing 2 (Zdhhc2), mRNA [NM_178395]
A_52_P571326	2.24022	Npsr1	NM_175678	Mus musculus neuropeptide S receptor 1 (Npsr1), mRNA [NM_175678]
A_52_P278566	2.23978	Lgr4	NM_172671	Mus musculus leucine-rich repeat-containing G protein-coupled receptor 4 (Lgr4), mRNA [NM_172671]
A_51_P153029	2.23866	Ankrd53	NM_029245	Mus musculus ankyrin repeat domain 53 (Ankrd53), mRNA [NM_029245]
A_52_P657844	2.23703	Zbtb20	AK038731	Mus musculus adult male hypothalamus cDNA, RIKEN full-length enriched library, clone:A230057M07 product:zinc finger protein 288, full insert sequence. [AK038731]
A_52_P302544	2.2355	Col8a2	NM_199473	Mus musculus procollagen, type VIII, alpha 2 (Col8a2), mRNA [NM_199473]
A_52_P376135	2.23522	Mknk2	NM_021462	Mus musculus MAP kinase-interacting serine/threonine kinase 2 (Mknk2), mRNA [NM_021462]
A_51_P121397	2.23368	Mrps17	NM_025450	Mus musculus mitochondrial ribosomal protein S17 (Mrps17), mRNA [NM_025450]
A_51_P360918	2.23368	Ehd3	NM_020578	Mus musculus EH-domain containing 3 (Ehd3), mRNA [NM_020578]
A_52_P664532	2.23296	Adrbk1	NM_130863	Mus musculus adrenergic receptor kinase, beta 1 (Adrbk1), mRNA [NM_130863]
A_52_P252258	2.23141	Mapk12	NM_013871	Mus musculus mitogen-activated protein kinase 12 (Mapk12), mRNA [NM_013871]
A_52_P590318	2.23095	Cwf19l2	AK014327	Mus musculus 14, 17 days embryo head cDNA, RIKEN full-length enriched library, clone:3230401L03 product:CWF19-like 2, cell cycle control (S. pombe), full insert sequence. [AK014327]
A_51_P507801	2.23061	F13a1	NM_028784	Mus musculus coagulation factor XIII, A1 subunit (F13a1), mRNA [NM_028784]
A_51_P505292	2.23053	Gkn1	NM_025466	Mus musculus gastrokine 1 (Gkn1), mRNA [NM_025466]
A_52_P162509	2.23035	4631427C17Rik	NM_021414	Mus musculus RIKEN cDNA 4631427C17 gene (4631427C17Rik), mRNA [NM_021414]
A_52_P117420	2.23018	Tacc1	NM_177089	Mus musculus transforming, acidic coiled-coil containing protein 1 (Tacc1), transcript variant 1, mRNA [NM_177089]
A_51_P177171	2.2293	Tie1	NM_011587	Mus musculus tyrosine kinase receptor 1 (Tie1), mRNA [NM_011587]
A_51_P153423	2.22833	Fndc1	NM_001081416	Mus musculus fibronectin type III domain containing 1 (Fndc1), mRNA [NM_001081416]
A_51_P351948	2.22799	AK046358	AK046358	Mus musculus adult male corpora quadrigemina cDNA, RIKEN full-length enriched library, clone:B230374P19 product:unclassifiable, full insert sequence [AK046358]
A_51_P518790	2.22769	Kif14	NM_001081258	Mus musculus kinesin family member 14 (Kif14), mRNA [NM_001081258]
A_52_P486774	2.22647	Cobll1	AK173076	Mus musculus mRNA for mKIAA0977 protein [AK173076]
A_51_P386503	2.22545	1300007F04Rik	NM_026185	Mus musculus RIKEN cDNA 1300007F04 gene (1300007F04Rik), mRNA [NM_026185]
A_51_P291417	2.2239	Thbd	NM_009378	Mus musculus thrombomodulin (Thbd), mRNA [NM_009378]
A_51_P224575	2.22386	Gnpat	NM_010322	Mus musculus glyceronephosphate O-acyltransferase (Gnpat), mRNA [NM_010322]
A_51_P347169	2.22191	4921517D21Rik	NM_026338	Mus musculus RIKEN cDNA 4921517D21 gene (4921517D21Rik), mRNA [NM_026338]
A_52_P115579	2.22182	Fbxo45	NM_173439	Mus musculus F-box protein 45 (Fbxo45), mRNA [NM_173439]
A_51_P287241	2.22116	1700012B07Rik	BC048675	Mus musculus RIKEN cDNA 1700012B07 gene, mRNA (cDNA clone MGC:58848 IMAGE:6774204), complete cds. [BC048675]
A_52_P508920	2.22027	Abca6	NM_147218	Mus musculus ATP-binding cassette, sub-family A (ABC1), member 6 (Abca6), mRNA [NM_147218]
A_51_P379171	2.22007	ENSMUST00000045536		Cobl-like 1 [Source:MarkerSymbol;Acc:MGI:2442894] [ENSMUST00000045536]
A_51_P193176	2.21988	Slc25a25	NM_146118	Mus musculus solute carrier family 25 (mitochondrial carrier, phosphate carrier), member 25 (Slc25a25), mRNA [NM_146118]
A_52_P686785	2.21988	Xlkd1	NM_053247	Mus musculus extra cellular link domain-containing 1 (Xlkd1), mRNA [NM_053247]
A_52_P240706	2.21941	Ceacam2	NM_007543	Mus musculus CEA-related cell adhesion molecule 2 (Ceacam2), mRNA [NM_007543]
A_51_P343252	2.21916	Cd151	NM_009842	Mus musculus CD151 antigen (Cd151), mRNA [NM_009842]
A_52_P611783	2.21898	Fxyd2	NM_052823	Mus musculus FXYD domain-containing ion transport regulator 2 (Fxyd2), transcript variant b, mRNA [NM_052823]
A_51_P297799	2.21882	Garnl4	NM_001015046	Mus musculus GTPase activating RANGAP domain-like 4 (Garnl4), mRNA [NM_001015046]
A_51_P353264	2.21741	Bmp5	AK079078	Mus musculus adult male diencephalon cDNA, RIKEN full-length enriched library, clone:9330158F20 product:unclassifiable, full insert sequence. [AK079078]
A_51_P255945	2.21725	Rps6ka5	NM_153587	Mus musculus ribosomal protein S6 kinase, polypeptide 5 (Rps6ka5), mRNA [NM_153587]
A_52_P273891	2.21707	Fmo2	NM_018881	Mus musculus flavin containing monooxygenase 2 (Fmo2), mRNA [NM_018881]
A_51_P345945	2.21683	Tsga8	AB032764	Mus musculus halap-X mRNA for haploid specific alanine-rich acidic protein, complete cds [AB032764]
A_51_P287715	2.21613	3100003L13Rik	AK013927	Mus musculus 13 days embryo head cDNA, RIKEN full-length enriched library, clone:3100003L13 product:weakly similar to 8430413N20RIK PROTEIN [Mus musculus], full insert sequence. [AK013927]
A_51_P241407	2.21552	BU557601	BU557601	AGENCOURT_10187243 NIH_MGC_144 Mus musculus cDNA clone IMAGE:6585538 5', mRNA sequence [BU557601]
A_52_P399095	2.21318	9030224M15Rik	NM_177793	Mus musculus RIKEN cDNA 9030224M15 gene (9030224M15Rik), mRNA [NM_177793]
A_52_P151528	2.21302	1700067C01Rik	NM_029714	Mus musculus RIKEN cDNA 1700067C01 gene (1700067C01Rik), mRNA [NM_029714]
A_52_P655803	2.21177	Chpt1	NM_144807	Mus musculus choline phosphotransferase 1 (Chpt1), mRNA [NM_144807]
A_51_P402165	2.21044	Rgs7	NM_011880	Mus musculus regulator of G protein signaling 7 (Rgs7), mRNA [NM_011880]
A_51_P112627	2.21033	St6galnac2	NM_009180	Mus musculus ST6 (alpha-N-acetyl-neuraminyl-2,3-beta-galactosyl-1,3)-N-acetylgalactosaminide alpha-2,6-sialyltransferase 2 (St6galnac2), mRNA [NM_009180]
A_52_P235616	2.20998	4933413J09Rik	AK016807	Mus musculus adult male testis cDNA, RIKEN full-length enriched library, clone:4933413J09 product:4933413J09RIK PROTEIN, full insert sequence. [AK016807]
A_52_P627099	2.20995	Tnrc6b	NM_177124	Mus musculus trinucleotide repeat containing 6b (Tnrc6b), transcript variant 2, mRNA [NM_177124]
A_51_P413251	2.2094	EG245190	XM_486328	PREDICTED: Mus musculus hypothetical protein 6430704N06 (6430704N06), mRNA [XM_486328]
A_52_P452315	2.20899	Syne2	NM_001005510	Mus musculus synaptic nuclear envelope 2 (Syne2), mRNA [NM_001005510]
A_52_P1149257	2.20811	OTTMUSG00000015946	AK039958	Mus musculus 0 day neonate thymus cDNA, RIKEN full-length enriched library, clone:A430035J22 product:hypothetical protein, full insert sequence. [AK039958]
A_51_P245368	2.20674	Abcb1b	NM_011075	Mus musculus ATP-binding cassette, sub-family B (MDR/TAP), member 1B (Abcb1b), mRNA [NM_011075]
A_52_P68101	2.20664	Ak2	NM_016895	Mus musculus adenylate kinase 2 (Ak2), transcript variant 2, mRNA [NM_016895]
A_51_P334318	2.20609	2010110P09Rik	NM_027363	Mus musculus RIKEN cDNA 2010110P09 gene (2010110P09Rik), mRNA [NM_027363]
A_52_P305279	2.20598	Spata13	AK151394	Mus musculus bone marrow macrophage cDNA, RIKEN full-length enriched library, clone:I830028P16 product:spermatogenesis associated 13, full insert sequence. [AK151394]
A_51_P239838	2.20576	TC1699037		Q44X67_9BURK (Q44X67) ATP-binding region, ATPase-like:Histidine kinase A, N-terminal, partial (5%) [TC1699037]
A_51_P125487	2.20527	Pgk2	NM_031190	Mus musculus phosphoglycerate kinase 2 (Pgk2), mRNA [NM_031190]
A_52_P821	2.20432	Fli1	NM_008026	Mus musculus Friend leukemia integration 1 (Fli1), mRNA [NM_008026]
A_51_P223611	2.20148	Pde3b	AK044183	Mus musculus 10 days neonate cortex cDNA, RIKEN full-length enriched library, clone:A830097M14 product:phosphodiesterase 3B, cGMP-inhibited, full insert sequence [AK044183]
A_51_P253117	2.20084	Sorbs1	NM_009166	Mus musculus sorbin and SH3 domain containing 1 (Sorbs1), transcript variant 1, mRNA [NM_009166]
A_51_P229925	2.2004	Chst7	NM_021715	Mus musculus carbohydrate (N-acetylglucosamino) sulfotransferase 7 (Chst7), mRNA [NM_021715]
A_51_P395546	2.19936	Phldb1	NM_153537	Mus musculus pleckstrin homology-like domain, family B, member 1 (Phldb1), mRNA [NM_153537]
A_52_P579580	2.19932	BB667085	BB667085	BB667085 RIKEN full-length enriched, 10, 11 days embryo Mus musculus cDNA clone 2810416G20 3', mRNA sequence [BB667085]
A_51_P449824	2.19697	4933417E01Rik	AK016842	Mus musculus adult male testis cDNA, RIKEN full-length enriched library, clone:4933417E01 product:hypothetical protein, full insert sequence [AK016842]
A_51_P103114	2.1969	Ptprg	NM_008981	Mus musculus protein tyrosine phosphatase, receptor type, G (Ptprg), mRNA [NM_008981]
A_51_P214087	2.19684	Cebpa	NM_007678	Mus musculus CCAAT/enhancer binding protein (C/EBP), alpha (Cebpa), mRNA [NM_007678]
A_51_P379341	2.19626	Neurod2	NM_010895	Mus musculus neurogenic differentiation 2 (Neurod2), mRNA [NM_010895]
A_51_P400868	2.19542	Pecam1	NM_008816	Mus musculus platelet/endothelial cell adhesion molecule 1 (Pecam1), transcript variant 1, mRNA [NM_008816]
A_51_P246690	2.19395	Dolpp1	NM_020329	Mus musculus dolichyl pyrophosphate phosphatase 1 (Dolpp1), mRNA [NM_020329]
A_51_P172085	2.19359	Arhgdig	NM_008113	Mus musculus Rho GDP dissociation inhibitor (GDI) gamma (Arhgdig), mRNA [NM_008113]
A_52_P20391	2.19324	LOC545261	CB182661	AGENCOURT_11383195 NIH_MGC_164 Mus musculus cDNA clone IMAGE:30243035 5', mRNA sequence [CB182661]
A_52_P638895	2.19314	Vegfa	NM_009505	Mus musculus vascular endothelial growth factor A (Vegfa), transcript variant 2, mRNA [NM_009505]
A_52_P195018	2.19065	Centd3	NM_139206	Mus musculus centaurin, delta 3 (Centd3), mRNA [NM_139206]
A_51_P133747	2.19051	Ppp1r3e	XM_993154	PREDICTED: Mus musculus protein phosphatase 1, regulatory (inhibitor) subunit 3E (Ppp1r3e), mRNA [XM_993154]
A_52_P365660	2.18917	Lrrc4c	NM_178725	Mus musculus leucine rich repeat containing 4C (Lrrc4c), mRNA [NM_178725]
A_52_P581056	2.18889	Tyro3	NM_019392	Mus musculus TYRO3 protein tyrosine kinase 3 (Tyro3), mRNA [NM_019392]
A_51_P298991	2.18637	OTTMUSG00000001284	AK036131	Mus musculus 16 days neonate cerebellum cDNA, RIKEN full-length enriched library, clone:9630038C08 product:unclassifiable, full insert sequence. [AK036131]
A_51_P314517	2.18616	Ankrd47	NM_030697	Mus musculus ankyrin repeat domain 47 (Ankrd47), mRNA [NM_030697]
A_51_P141546	2.18473	Orm2	NM_011016	Mus musculus orosomucoid 2 (Orm2), mRNA [NM_011016]
A_52_P251690	2.18383	Gvin1	NM_029000	Mus musculus GTPase, very large interferon inducible 1 (Gvin1), transcript variant A, mRNA [NM_029000]
A_51_P436559	2.18301	Punc	AK012957	Mus musculus 10, 11 days embryo whole body cDNA, RIKEN full-length enriched library, clone:2810401C09 product:unclassifiable, full insert sequence [AK012957]
A_52_P404533	2.18252	Hspb1	NM_013560	Mus musculus heat shock protein 1 (Hspb1), mRNA [NM_013560]
A_51_P208845	2.18226	Egflam	NM_178748	Mus musculus EGF-like, fibronectin type III and laminin G domains (Egflam), mRNA [NM_178748]
A_52_P279368	2.18154	Sox17	NM_011441	Mus musculus SRY-box containing gene 17 (Sox17), mRNA [NM_011441]
A_51_P213077	2.18123	Adamtsl3	AK020361	Mus musculus adult male epididymis cDNA, RIKEN full-length enriched library, clone:9230119C12 product:similar to ADAM-TSL3 PRECURSOR (FRAGMENT) [Homo sapiens], full insert sequence. [AK020361]
A_52_P923563	2.1803	AK078430	AK078430	Mus musculus 12 days embryo male wolffian duct includes surrounding region cDNA, RIKEN full-length enriched library, clone:6720460L01 product:unclassifiable, full insert sequence. [AK078430]
A_51_P448325	2.17636	Esam1	NM_027102	Mus musculus endothelial cell-specific adhesion molecule (Esam1), mRNA [NM_027102]
A_51_P350105	2.17617	4921521F21Rik	NM_027582	Mus musculus RIKEN cDNA 4921521F21 gene (4921521F21Rik), mRNA [NM_027582]
A_52_P665675	2.17537	Abca1	NM_013454	Mus musculus ATP-binding cassette, sub-family A (ABC1), member 1 (Abca1), mRNA [NM_013454]
A_51_P483159	2.1744	Gchfr	NM_177157	Mus musculus GTP cyclohydrolase I feedback regulator (Gchfr), mRNA [NM_177157]
A_52_P181709	2.17433	Crkl	NM_007764	Mus musculus v-crk sarcoma virus CT10 oncogene homolog (avian)-like (Crkl), mRNA [NM_007764]
A_52_P487599	2.17281	Thnsl2	NM_178413	Mus musculus threonine synthase-like 2 (bacterial) (Thnsl2), transcript variant 1, mRNA [NM_178413]
A_51_P464118	2.17269	ENSMUST00000097661		RIKEN cDNA 5830472F04 gene [Source:MarkerSymbol;Acc:MGI:1923354] [ENSMUST00000097661]
A_51_P373599	2.17201	Slc9a4	NM_177084	Mus musculus solute carrier family 9 (sodium/hydrogen exchanger), member 4 (Slc9a4), mRNA [NM_177084]
A_52_P43549	2.17148	Cd38	NM_007646	Mus musculus CD38 antigen (Cd38), mRNA [NM_007646]
A_51_P306183	2.17033	Mafk	NM_010757	Mus musculus v-maf musculoaponeurotic fibrosarcoma oncogene family, protein K (avian) (Mafk), mRNA [NM_010757]
A_52_P141909	2.16795	NAP058291-1
A_51_P463765	2.16755	Timp3	NM_011595	Mus musculus tissue inhibitor of metalloproteinase 3 (Timp3), mRNA [NM_011595]
A_51_P510782	2.16747	Card10	NM_130859	Mus musculus caspase recruitment domain family, member 10 (Card10), mRNA [NM_130859]
A_51_P106527	2.16728	9530058B02Rik	NM_026633	Mus musculus RIKEN cDNA 9530058B02 gene (9530058B02Rik), mRNA [NM_026633]
A_51_P308931	2.16638	Hcrt	NM_010410	Mus musculus hypocretin (Hcrt), mRNA [NM_010410]
A_51_P370423	2.16578	Clstn2	NM_022319	Mus musculus calsyntenin 2 (Clstn2), mRNA [NM_022319]
A_51_P370600	2.16434	Fli1	NM_008026	Mus musculus Friend leukemia integration 1 (Fli1), mRNA [NM_008026]
A_51_P476829	2.16382	D930001I22Rik	NM_173397	Mus musculus RIKEN cDNA D930001I22 gene (D930001I22Rik), mRNA [NM_173397]
A_52_P81210	2.16113	Dmd	NM_007868	Mus musculus dystrophin, muscular dystrophy (Dmd), mRNA [NM_007868]
A_52_P617924	2.16099	Hist3h2a		histone cluster 3, H2a [Source:MarkerSymbol;Acc:MGI:2448458] [ENSMUST00000047697]
A_51_P494491	2.15981	Phox2b	NM_008888	Mus musculus paired-like homeobox 2b (Phox2b), mRNA [NM_008888]
A_51_P300038	2.15852	Ldhd	NM_027570	Mus musculus lactate dehydrogenase D (Ldhd), mRNA [NM_027570]
A_52_P328102	2.15826	A930033H14Rik	AK084964	Mus musculus 13 days embryo lung cDNA, RIKEN full-length enriched library, clone:D430019O20 product:unclassifiable, full insert sequence [AK084964]
A_52_P553316	2.15803	Snrk	NM_133741	Mus musculus SNF related kinase (Snrk), mRNA [NM_133741]
A_52_P281011	2.15781	Tacr2	NM_009314	Mus musculus tachykinin receptor 2 (Tacr2), mRNA [NM_009314]
A_51_P292127	2.15749	Pgm2l1	NM_027629	Mus musculus phosphoglucomutase 2-like 1 (Pgm2l1), mRNA [NM_027629]
A_51_P133992	2.15676	2210404O07Rik	BC100511	Mus musculus RIKEN cDNA 2210404O07 gene, mRNA (cDNA clone IMAGE:30918678) [BC100511]
A_51_P221677	2.15663	Trim62	NM_178110	Mus musculus tripartite motif-containing 62 (Trim62), mRNA [NM_178110]
A_51_P394354	2.15613	5730469M10Rik	NM_027464	Mus musculus RIKEN cDNA 5730469M10 gene (5730469M10Rik), mRNA [NM_027464]
A_51_P107782	2.15492	Fvt1	BC023820	Mus musculus follicular lymphoma variant translocation 1, mRNA (cDNA clone MGC:36450 IMAGE:5354804), complete cds. [BC023820]
A_51_P272106	2.15362	Cirbp	NM_007705	Mus musculus cold inducible RNA binding protein (Cirbp), mRNA [NM_007705]
A_52_P88818	2.15304	Clybl	NM_029556	Mus musculus citrate lyase beta like (Clybl), mRNA [NM_029556]
A_52_P413756	2.15219	Pi16	NM_023734	Mus musculus peptidase inhibitor 16 (Pi16), mRNA [NM_023734]
A_52_P647260	2.15193	Synpo2	AK035258	Mus musculus adult male urinary bladder cDNA, RIKEN full-length enriched library, clone:9530006G20 product:unclassifiable, full insert sequence. [AK035258]
A_51_P190886	2.14973	Ankrd13a	NM_026718	Mus musculus ankyrin repeat domain 13a (Ankrd13a), mRNA [NM_026718]
A_51_P364694	2.14969	AK138790	AK138790	Mus musculus 0 day neonate thymus cDNA, RIKEN full-length enriched library, clone:A430071M17 product:unclassifiable, full insert sequence [AK138790]
A_52_P578723	2.14891	Grit	NM_177379	Mus musculus Rho GTPase-activating protein (Grit), mRNA [NM_177379]
A_51_P390739	2.14854	Tjp1	NM_009386	Mus musculus tight junction protein 1 (Tjp1), mRNA [NM_009386]
A_51_P426739	2.14833	Gpt1	NM_182805	Mus musculus glutamic pyruvic transaminase 1, soluble (Gpt1), mRNA [NM_182805]
A_51_P177210	2.14718	Myl3	NM_010859	Mus musculus myosin, light polypeptide 3 (Myl3), mRNA [NM_010859]
A_52_P596755	2.14389	BC048355	NM_207161	Mus musculus cDNA sequence BC048355 (BC048355), mRNA [NM_207161]
A_51_P462918	2.14327	Ehhadh	NM_023737	Mus musculus enoyl-Coenzyme A, hydratase/3-hydroxyacyl Coenzyme A dehydrogenase (Ehhadh), mRNA [NM_023737]
A_52_P48557	2.14303	5033428I22Rik	AK017203	Mus musculus 11 days pregnant adult female ovary and uterus cDNA, RIKEN full-length enriched library, clone:5033428I22 product:unclassifiable, full insert sequence. [AK017203]
A_51_P311958	2.1426	Orm3	NM_013623	Mus musculus orosomucoid 3 (Orm3), mRNA [NM_013623]
A_51_P128491	2.14221	Tcn2	NM_015749	Mus musculus transcobalamin 2 (Tcn2), mRNA [NM_015749]
A_51_P285137	2.14181	Dmxl2	XM_358382	PREDICTED: Mus musculus Dmx-like 2 (Dmxl2), mRNA [XM_358382]
A_52_P201992	2.14136	Gyltl1b	AK081797	Mus musculus 16 days embryo head cDNA, RIKEN full-length enriched library, clone:C130078C02 product:glycosyltransferase-like 1B, full insert sequence. [AK081797]
A_51_P283968	2.14027	Adamts18	NM_172466	Mus musculus a disintegrin-like and metallopeptidase (reprolysin type) with thrombospondin type 1 motif, 18 (Adamts18), mRNA [NM_172466]
A_52_P661	2.14022	Plxna4	AK081523	Mus musculus 16 days embryo head cDNA, RIKEN full-length enriched library, clone:C130030P07 product:unclassifiable, full insert sequence [AK081523]
A_51_P379428	2.14	Syp	NM_009305	Mus musculus synaptophysin (Syp), mRNA [NM_009305]
A_52_P383378	2.13951	Whdc1	NM_001004185	Mus musculus WAS protein homology region 2 domain containing 1 (Whdc1), mRNA [NM_001004185]
A_51_P286996	2.13888	Fxyd1	AF089734	Mus musculus phospholemman precursor, mRNA, complete cds. [AF089734]
A_51_P478920	2.13862	Exoc6	NM_175353	Mus musculus exocyst complex component 6 (Exoc6), mRNA [NM_175353]
A_52_P322421	2.13728	Eva1	NM_007962	Mus musculus epithelial V-like antigen 1 (Eva1), mRNA [NM_007962]
A_52_P306327	2.13678	Igf1	AK050118	Mus musculus adult male liver tumor cDNA, RIKEN full-length enriched library, clone:C730016P09 product:unclassifiable, full insert sequence [AK050118]
A_51_P223199	2.13677	Osbpl11	NM_176840	Mus musculus oxysterol binding protein-like 11 (Osbpl11), mRNA [NM_176840]
A_52_P499879	2.13478	Gstz1	NM_010363	Mus musculus glutathione transferase zeta 1 (maleylacetoacetate isomerase) (Gstz1), mRNA [NM_010363]
A_52_P34043	2.1333	Ppm1b	NM_011151	Mus musculus protein phosphatase 1B, magnesium dependent, beta isoform (Ppm1b), mRNA [NM_011151]
A_52_P465946	2.13115	Olfr275	NM_146858	Mus musculus olfactory receptor 275 (Olfr275), mRNA [NM_146858]
A_52_P528707	2.13054	Mrp63	NM_026401	Mus musculus mitochondrial ribosomal protein 63 (Mrp63), mRNA [NM_026401]
A_52_P590625	2.12917	Nlrp10	NM_175532	Mus musculus NLR family, pyrin domain containing 10 (Nlrp10), mRNA [NM_175532]
A_51_P224311	2.12913	Popdc2	NM_022318	Mus musculus popeye domain containing 2 (Popdc2), transcript variant 2, mRNA [NM_022318]
A_52_P525317	2.12787	Gja5	NM_008121	Mus musculus gap junction membrane channel protein alpha 5 (Gja5), mRNA [NM_008121]
A_52_P221756	2.12666	Spock2	NM_052994	Mus musculus sparc/osteonectin, cwcv and kazal-like domains proteoglycan 2 (Spock2), mRNA [NM_052994]
A_51_P141180	2.12524	D030051N19Rik	AK083596	Mus musculus 9 days embryo whole body cDNA, RIKEN full-length enriched library, clone:D030051N19 product:ISCHEMIA RELATED FACTOR NYW-1 homolog [Rattus norvegicus], full insert sequence. [AK083596]
A_51_P273405	2.12453	Spnb2	NM_175836	Mus musculus spectrin beta 2 (Spnb2), transcript variant 1, mRNA [NM_175836]
A_52_P173442	2.12417	4933413A10Rik	AK030181	Mus musculus adult male testis cDNA, RIKEN full-length enriched library, clone:4933413A10 product:hypothetical Sulfotransferase containing protein, full insert sequence [AK030181]
A_51_P225224	2.12269	Htra1	NM_019564	Mus musculus HtrA serine peptidase 1 (Htra1), mRNA [NM_019564]
A_51_P510713	2.12177	Isg20	NM_020583	Mus musculus interferon-stimulated protein (Isg20), mRNA [NM_020583]
A_51_P361678	2.1211	Cgnl1	NM_026599	Mus musculus cingulin-like 1 (Cgnl1), mRNA [NM_026599]
A_51_P162340	2.12095	6530402F18Rik	AK220426	Mus musculus mRNA for mKIAA1857 protein [AK220426]
A_52_P448829	2.12035	AK034318	AK034318	Mus musculus adult male diencephalon cDNA, RIKEN full-length enriched library, clone:9330176N07 product:unclassifiable, full insert sequence. [AK034318]
A_51_P380527	2.11966	4631427C17Rik	NM_021414	Mus musculus RIKEN cDNA 4631427C17 gene (4631427C17Rik), mRNA [NM_021414]
A_51_P381550	2.11955	1700010B13Rik	AK133430	Mus musculus adult male testis cDNA, RIKEN full-length enriched library, clone:4933428H08 product:unclassifiable, full insert sequence [AK133430]
A_51_P374878	2.11858	D330045A20Rik	NM_175326	Mus musculus RIKEN cDNA D330045A20 gene (D330045A20Rik), mRNA [NM_175326]
A_52_P363316	2.11852	Ccdc110	NM_001033246	Mus musculus coiled-coil domain containing 110 (Ccdc110), mRNA [NM_001033246]
A_52_P39756	2.11844	Garnl4	NM_001015046	Mus musculus GTPase activating RANGAP domain-like 4 (Garnl4), mRNA [NM_001015046]
A_52_P638732	2.1182	Dock11	NM_001009947	Mus musculus dedicator of cytokinesis 11 (Dock11), mRNA [NM_001009947]
A_51_P279552	2.1161	Cav2	NM_016900	Mus musculus caveolin 2 (Cav2), mRNA [NM_016900]
A_51_P199725	2.11595	Arhgap24	NM_146161	Mus musculus Rho GTPase activating protein 24 (Arhgap24), transcript variant 2, mRNA [NM_146161]
A_52_P421133	2.11449	Bckdha	NM_007533	Mus musculus branched chain ketoacid dehydrogenase E1, alpha polypeptide (Bckdha), mRNA [NM_007533]
A_51_P128526	2.11392	Ptp4a1	NM_011200	Mus musculus protein tyrosine phosphatase 4a1 (Ptp4a1), mRNA [NM_011200]
A_51_P517388	2.11267	1100001H23Rik	NM_025806	Mus musculus RIKEN cDNA 1100001H23 gene (1100001H23Rik), mRNA [NM_025806]
A_51_P116906	2.11262	Rapgef3	NM_144850	Mus musculus Rap guanine nucleotide exchange factor (GEF) 3 (Rapgef3), mRNA [NM_144850]
A_52_P267505	2.11102	Abca8b	NM_013851	Mus musculus ATP-binding cassette, sub-family A (ABC1), member 8b (Abca8b), mRNA [NM_013851]
A_52_P411076	2.11088	1700028K03Rik	BC106106	Mus musculus RIKEN cDNA 1700028K03 gene, mRNA (cDNA clone MGC:117884 IMAGE:6491480), complete cds. [BC106106]
A_51_P375146	2.10789	Cd36	NM_007643	Mus musculus CD36 antigen (Cd36), mRNA [NM_007643]
A_51_P272147	2.10572	1500005A01Rik	NM_033146	Mus musculus RIKEN cDNA 1500005A01 gene (1500005A01Rik), mRNA [NM_033146]
A_52_P453013	2.10514	Fabp2	NM_007980	Mus musculus fatty acid binding protein 2, intestinal (Fabp2), mRNA [NM_007980]
A_52_P512807	2.10468	Ccny	XM_974899	PREDICTED: Mus musculus RIKEN cDNA 5730405I09 gene, transcript variant 4 (5730405I09Rik), mRNA [XM_974899]
A_52_P1172234	2.10444	AK029558	AK029558	Mus musculus adult male testis cDNA, RIKEN full-length enriched library, clone:4921530F17 product:hypothetical protein, full insert sequence. [AK029558]
A_51_P360262	2.10369	Immp2l	NM_053122	Mus musculus IMP2 inner mitochondrial membrane peptidase-like (S. cerevisiae) (Immp2l), mRNA [NM_053122]
A_51_P266211	2.10323	Snrk	NM_133741	Mus musculus SNF related kinase (Snrk), mRNA [NM_133741]
A_51_P196590	2.10282	Hadh	NM_008212	Mus musculus hydroxyacyl-Coenzyme A dehydrogenase (Hadh), mRNA [NM_008212]
A_52_P241742	2.10228	2010003O02Rik	AK008077	Mus musculus adult male small intestine cDNA, RIKEN full-length enriched library, clone:2010003O02 product:RIKEN cDNA 2010003O02 gene, full insert sequence. [AK008077]
A_51_P427432	2.10146	Grhpr	NM_080289	Mus musculus glyoxylate reductase/hydroxypyruvate reductase (Grhpr), mRNA [NM_080289]
A_52_P1108460	2.10028	AK084568	AK084568	Mus musculus 13 days embryo heart cDNA, RIKEN full-length enriched library, clone:D330016C02 product:unclassifiable, full insert sequence. [AK084568]
A_52_P481686	2.09946	Wtip	NM_207212	Mus musculus WT1-interacting protein (Wtip), mRNA [NM_207212]
A_52_P664663	2.09902	Rabepk	NM_145522	Mus musculus Rab9 effector protein with kelch motifs (Rabepk), mRNA [NM_145522]
A_52_P629748	2.09833	4732444A12Rik	AK144387	Mus musculus 21 days neonate cerebellum cDNA, RIKEN full-length enriched library, clone:G630051C23 product:hypothetical protein, full insert sequence [AK144387]
A_52_P486260	2.09724	Prelp	NM_054077	Mus musculus proline arginine-rich end leucine-rich repeat (Prelp), mRNA [NM_054077]
A_51_P428464	2.09718	Cdyl2	NM_029441	Mus musculus chromodomain protein, Y chromosome-like 2 (Cdyl2), mRNA [NM_029441]
A_51_P212491	2.09635	Pfkfb3	NM_133232	Mus musculus 6-phosphofructo-2-kinase/fructose-2,6-biphosphatase 3 (Pfkfb3), mRNA [NM_133232]
A_52_P453814	2.09618	Rasgrp2	NM_011242	Mus musculus RAS, guanyl releasing protein 2 (Rasgrp2), mRNA [NM_011242]
A_51_P444301	2.09611	Brp44l	NM_018819	Mus musculus brain protein 44-like (Brp44l), mRNA [NM_018819]
A_52_P644452	2.096	Dock9	NM_001081039	Mus musculus dedicator of cytokinesis 9 (Dock9), mRNA [NM_001081039]
A_52_P444116	2.09533	TC1729826		Q3ZC59_BOVIN (Q3ZC59) GABARAPL2 protein (Fragment), partial (79%) [TC1729826]
A_52_P232220	2.09491	Tjp2	NM_011597	Mus musculus tight junction protein 2 (Tjp2), mRNA [NM_011597]
A_52_P1083441	2.09486	Ddx3y	AK020213	Mus musculus 15 days embryo male testis cDNA, RIKEN full-length enriched library, clone:8030469F12 product:unclassifiable, full insert sequence. [AK020213]
A_51_P402994	2.09436	Ddx3y	NM_012008	Mus musculus DEAD (Asp-Glu-Ala-Asp) box polypeptide 3, Y-linked (Ddx3y), mRNA [NM_012008]
A_52_P156540	2.09436	Tpk1	NM_013861	Mus musculus thiamine pyrophosphokinase (Tpk1), mRNA [NM_013861]
A_52_P115565	2.09416	4930500J02Rik	AK015665	Mus musculus adult male testis cDNA, RIKEN full-length enriched library, clone:4930500J02 product:unclassifiable, full insert sequence [AK015665]
A_52_P642879	2.09379	Fbxo21	NM_145564	Mus musculus F-box protein 21 (Fbxo21), mRNA [NM_145564]
A_52_P612440	2.09367	AK033032	AK033032	Mus musculus 11 days embryo gonad cDNA, RIKEN full-length enriched library, clone:7030414N10 product:unclassifiable, full insert sequence. [AK033032]
A_51_P384831	2.09355	Syt12	NM_134164	Mus musculus synaptotagmin XII (Syt12), mRNA [NM_134164]
A_51_P310967	2.09292	Aifm2	NM_153779	Mus musculus apoptosis-inducing factor, mitochondrion-associated 2 (Aifm2), transcript variant 1, mRNA [NM_153779]
A_51_P428708	2.09275	C4b	NM_009780	Mus musculus complement component 4B (Childo blood group) (C4b), mRNA [NM_009780]
A_51_P339232	2.09205	Snta1	NM_009228	Mus musculus syntrophin, acidic 1 (Snta1), mRNA [NM_009228]
A_51_P136870	2.09119	Tanc1	AK030022	Mus musculus adult male testis cDNA, RIKEN full-length enriched library, clone:4932416C15 product:hypothetical Ankyrin repeat profile/Serine-rich region/Ankyrin-repeat/Ankyrin repeat region circular profile/Yeast DNA-binding domain containing protein,...
A_52_P460050	2.09113	TC1734110		MMHC425O18 NG28 {Mus musculus} (exp=-1; wgp=0; cg=0), partial (18%) [TC1734110]
A_52_P592177	2.09084	Disc1	NM_174853	Mus musculus disrupted in schizophrenia 1 (Disc1), transcript variant 2, mRNA [NM_174853]
A_52_P254817	2.08938	Retnla	NM_020509	Mus musculus resistin like alpha (Retnla), mRNA [NM_020509]
A_51_P331752	2.08912	Ccl11	NM_011330	Mus musculus small chemokine (C-C motif) ligand 11 (Ccl11), mRNA [NM_011330]
A_52_P61273	2.08797	Leng8	NM_172736	Mus musculus leukocyte receptor cluster (LRC) member 8 (Leng8), mRNA [NM_172736]
A_51_P257951	2.08737	Retnla	NM_020509	Mus musculus resistin like alpha (Retnla), mRNA [NM_020509]
A_51_P407227	2.08734	Gimap6	NM_153175	Mus musculus GTPase, IMAP family member 6 (Gimap6), mRNA [NM_153175]
A_52_P625102	2.08717	B230206H07Rik	NM_177280	Mus musculus RIKEN cDNA B230206H07 gene (B230206H07Rik), mRNA [NM_177280]
A_52_P64726	2.08477	4930432J01Rik	AK019592	Mus musculus adult male testis cDNA, RIKEN full-length enriched library, clone:4930432J01 product:unclassifiable, full insert sequence. [AK019592]
A_51_P412999	2.08393	ENSMUST00000051210		ring finger protein 157 [Source:MarkerSymbol;Acc:MGI:2442484] [ENSMUST00000051210]
A_52_P115787	2.08144	Grb10	NM_010345	Mus musculus growth factor receptor bound protein 10 (Grb10), mRNA [NM_010345]
A_52_P143866	2.08141	Glul	NM_008131	Mus musculus glutamate-ammonia ligase (glutamine synthetase) (Glul), mRNA [NM_008131]
A_52_P306845	2.07968	Cav1	NM_007616	Mus musculus caveolin, caveolae protein 1 (Cav1), mRNA [NM_007616]
A_52_P136782	2.07952	Rgs5	NM_009063	Mus musculus regulator of G-protein signaling 5 (Rgs5), mRNA [NM_009063]
A_52_P449208	2.07891	Adcy5	NM_001012765	Mus musculus adenylate cyclase 5 (Adcy5), mRNA [NM_001012765]
A_52_P575054	2.07843	AK087326	AK087326	Mus musculus 0 day neonate lung cDNA, RIKEN full-length enriched library, clone:E030045C03 product:unclassifiable, full insert sequence. [AK087326]
A_52_P679769	2.07763	Cat	NM_009804	Mus musculus catalase (Cat), mRNA [NM_009804]
A_51_P336325	2.07736	Orm1	NM_008768	Mus musculus orosomucoid 1 (Orm1), mRNA [NM_008768]
A_52_P490493	2.07622	Cgnl1	NM_026599	Mus musculus cingulin-like 1 (Cgnl1), mRNA [NM_026599]
A_52_P116134	2.07414	Aldh2	NM_009656	Mus musculus aldehyde dehydrogenase 2, mitochondrial (Aldh2), mRNA [NM_009656]
A_52_P73913	2.07306	TC1675855		KATL1_MOUSE (Q8K0T4) Katanin p60 ATPase-containing subunit A-like 1 (Katanin p60 subunit A-like 1) (p60 katanin-like 1) , partial (23%) [TC1675855]
A_52_P184974	2.07298	1700024G10Rik	AK006300	Mus musculus adult male testis cDNA, RIKEN full-length enriched library, clone:1700024G10 product:hypothetical Cytochrome c family heme-binding site containing protein, full insert sequence. [AK006300]
A_52_P488252	2.07051	Larp2	AK136175	Mus musculus in vitro fertilized eggs cDNA, RIKEN full-length enriched library, clone:7420469I18 product:hypothetical protein, full insert sequence. [AK136175]
A_52_P20765	2.06988	Syt12	NM_134164	Mus musculus synaptotagmin XII (Syt12), mRNA [NM_134164]
A_52_P480064	2.06963	Tmem134	NM_025889	Mus musculus transmembrane protein 134 (Tmem134), transcript variant 2, mRNA [NM_025889]
A_51_P479914	2.06865	Pik3cb	NM_029094	Mus musculus phosphatidylinositol 3-kinase, catalytic, beta polypeptide (Pik3cb), mRNA [NM_029094]
A_52_P153522	2.06846	Crisp4	NM_030033	Mus musculus cysteine-rich secretory protein 4 (Crisp4), mRNA [NM_030033]
A_51_P328850	2.06809	Abcc9	NM_021041	Mus musculus ATP-binding cassette, sub-family C (CFTR/MRP), member 9 (Abcc9), transcript variant 2, mRNA [NM_021041]
A_52_P332081	2.06753	Negr1	NM_177274	Mus musculus neuronal growth regulator 1 (Negr1), transcript variant 2, mRNA [NM_177274]
A_52_P245316	2.06712	Gm98	AK141695	Mus musculus 9 days embryo whole body cDNA, RIKEN full-length enriched library, clone:D030026I12 product:Best's macular dystrophy related protein (Fragment) homolog [Homo sapiens], full insert sequence. [AK141695]
A_51_P420806	2.06585	Uck1	NM_011675	Mus musculus uridine-cytidine kinase 1 (Uck1), mRNA [NM_011675]
A_52_P456134	2.06459	Dgat1	NM_010046	Mus musculus diacylglycerol O-acyltransferase 1 (Dgat1), mRNA [NM_010046]
A_52_P155692	2.06403	St3gal3	NM_009176	Mus musculus ST3 beta-galactoside alpha-2,3-sialyltransferase 3 (St3gal3), mRNA [NM_009176]
A_51_P362429	2.06295	Myh11	NM_013607	Mus musculus myosin, heavy polypeptide 11, smooth muscle (Myh11), mRNA [NM_013607]
A_51_P323812	2.06255	Slc6a12	NM_133661	Mus musculus solute carrier family 6 (neurotransmitter transporter, betaine/GABA), member 12 (Slc6a12), mRNA [NM_133661]
A_51_P304681	2.06228	Clpx	AF134983	Mus musculus energy-dependent regulator of proteolysis (ClpX) mRNA, complete cds. [AF134983]
A_52_P462296	2.06187	Cpeb1	NM_007755	Mus musculus cytoplasmic polyadenylation element binding protein 1 (Cpeb1), mRNA [NM_007755]
A_51_P510059	2.05918	Dgat1	NM_010046	Mus musculus diacylglycerol O-acyltransferase 1 (Dgat1), mRNA [NM_010046]
A_51_P114772	2.05916	Cpne1	NM_170588	Mus musculus copine I (Cpne1), transcript variant 1, mRNA [NM_170588]
A_52_P599514	2.05898	Klrb1c	NM_008527	Mus musculus killer cell lectin-like receptor subfamily B member 1C (Klrb1c), mRNA [NM_008527]
A_52_P498557	2.05848	0610039H22Rik	AK002838	Mus musculus adult male kidney cDNA, RIKEN full-length enriched library, clone:0610039H22 product:unclassifiable, full insert sequence. [AK002838]
A_51_P234253	2.05826	Sdcbp2	NM_145535	Mus musculus syndecan binding protein (syntenin) 2 (Sdcbp2), mRNA [NM_145535]
A_51_P355906	2.05593	Kit	NM_021099	Mus musculus kit oncogene (Kit), mRNA [NM_021099]
A_51_P496245	2.05561	Hoxc6	X16511	Mouse mRNA for HOX 3.3 PRII transcript [X16511]
A_52_P300786	2.05548	Naip5	NM_010870	Mus musculus NLR family, apoptosis inhibitory protein 5 (Naip5), mRNA [NM_010870]
A_52_P292965	2.05518	9330159M07Rik	AK034149	Mus musculus adult male diencephalon cDNA, RIKEN full-length enriched library, clone:9330159M07 product:unclassifiable, full insert sequence [AK034149]
A_52_P277378	2.05494	Thap2	AK081406	Mus musculus 16 days embryo head cDNA, RIKEN full-length enriched library, clone:C130014K08 product:unclassifiable, full insert sequence. [AK081406]
A_51_P479715	2.05388	Eif2s3y	NM_012011	Mus musculus eukaryotic translation initiation factor 2, subunit 3, structural gene Y-linked (Eif2s3y), mRNA [NM_012011]
A_51_P187461	2.05289	Rel	NM_009044	Mus musculus reticuloendotheliosis oncogene (Rel), mRNA [NM_009044]
A_52_P379665	2.05275	NAP044101-1
A_51_P138429	2.05079	Btc	NM_007568	Mus musculus betacellulin, epidermal growth factor family member (Btc), mRNA [NM_007568]
A_51_P368586	2.05028	Ablim1	AF316037	Mus musculus actin-binding double zinc finger protein mRNA, 3' untranslated region, partial sequence. [AF316037]
A_52_P662042	2.04989	Tcl1b5	NM_013776	Mus musculus T-cell leukemia/lymphoma 1B, 5 (Tcl1b5), mRNA [NM_013776]
A_52_P546162	2.04856	Gm1077	XM_355832	PREDICTED: Mus musculus gene model 1077, (NCBI) (Gm1077), mRNA [XM_355832]
A_52_P394539	2.04826	Tex2	NM_198292	Mus musculus testis expressed gene 2 (Tex2), mRNA [NM_198292]
A_52_P584058	2.04771	Ivns1abp	NM_001039511	Mus musculus influenza virus NS1A binding protein (Ivns1abp), transcript variant 1, mRNA [NM_001039511]
A_52_P405460	2.04729	Gprc5c	BC008228	Mus musculus G protein-coupled receptor, family C, group 5, member C, mRNA (cDNA clone MGC:6786 IMAGE:2646597), complete cds. [BC008228]
A_52_P141417	2.04685	Dact1	NM_021532	Mus musculus dapper homolog 1, antagonist of beta-catenin (xenopus) (Dact1), mRNA [NM_021532]
A_52_P194971	2.04675	Hoxb7	NM_010460	Mus musculus homeo box B7 (Hoxb7), mRNA [NM_010460]
A_51_P225427	2.04583	Pkp2	NM_026163	Mus musculus plakophilin 2 (Pkp2), mRNA [NM_026163]
A_51_P509352	2.04532	BI694651	BI694651	BI694651 603347882F1 NCI_CGAP_Mam2 Mus musculus cDNA clone IMAGE:5375204 5', mRNA sequence [BI694651]
A_52_P779137	2.04463	EG383462	AK035412	Mus musculus adult male urinary bladder cDNA, RIKEN full-length enriched library, clone:9530034N13 product:unclassifiable, full insert sequence [AK035412]
A_52_P243542	2.04455	Cugbp2	NM_010160	Mus musculus CUG triplet repeat, RNA binding protein 2 (Cugbp2), mRNA [NM_010160]
A_52_P86935	2.04351	Mocos	NM_026779	Mus musculus molybdenum cofactor sulfurase (Mocos), mRNA [NM_026779]
A_52_P670263	2.04342	Tfpi	BC036146	Mus musculus tissue factor pathway inhibitor, mRNA (cDNA clone MGC:37332 IMAGE:4975683), complete cds. [BC036146]
A_52_P614320	2.04293	Gm128	NM_001024841	Mus musculus gene model 128, (NCBI) (Gm128), mRNA [NM_001024841]
A_51_P283044	2.04269	Jarid1d	NM_011419	Mus musculus jumonji, AT rich interactive domain 1D (Rbp2 like) (Jarid1d), mRNA [NM_011419]
A_51_P273750	2.04239	Gnrh1	NM_008145	Mus musculus gonadotropin releasing hormone 1 (Gnrh1), mRNA [NM_008145]
A_52_P666442	2.04219	EG668139	XR_001627	PREDICTED: Mus musculus similar to very large inducible GTPase 1 isoform A (LOC668139), mRNA [XR_001627]
A_51_P342652	2.04212	Cd79b	NM_008339	Mus musculus CD79B antigen (Cd79b), mRNA [NM_008339]
A_51_P378298	2.04176	Faim3	NM_026976	Mus musculus Fas apoptotic inhibitory molecule 3 (Faim3), mRNA [NM_026976]
A_52_P413626	2.04119	BC030863	XM_622935	PREDICTED: Mus musculus cDNA sequence BC030863, transcript variant 2 (BC030863), mRNA [XM_622935]
A_51_P517157	2.04118	Tmem43	NM_028766	Mus musculus transmembrane protein 43 (Tmem43), mRNA [NM_028766]
A_51_P204740	2.04098	Cd34	NM_133654	Mus musculus CD34 antigen (Cd34), mRNA [NM_133654]
A_52_P634250	2.03878	Lgals4	NM_010706	Mus musculus lectin, galactose binding, soluble 4 (Lgals4), mRNA [NM_010706]
A_51_P384894	2.03876	BC117090	NM_001001332	Mus musculus cDNA sequence BC1179090 (BC117090), mRNA [NM_001001332]
A_51_P114843	2.03849	H1fx	NM_198622	Mus musculus H1 histone family, member X (H1fx), mRNA [NM_198622]
A_51_P486810	2.03773	Gpx2	NM_030677	Mus musculus glutathione peroxidase 2 (Gpx2), mRNA [NM_030677]
A_51_P234044	2.03762	1190005I06Rik	NM_197988	Mus musculus RIKEN cDNA 1190005I06 gene (1190005I06Rik), mRNA [NM_197988]
A_52_P153291	2.03642	Ccrl1	NM_145700	Mus musculus chemokine (C-C motif) receptor-like 1 (Ccrl1), mRNA [NM_145700]
A_51_P324814	2.03582	Krt18	NM_010664	Mus musculus keratin 18 (Krt18), mRNA [NM_010664]
A_51_P209921	2.03569	9330159F19Rik	AK034141	Mus musculus adult male diencephalon cDNA, RIKEN full-length enriched library, clone:9330159F19 product:weakly similar to KIAA0408 [Homo sapiens], full insert sequence [AK034141]
A_51_P258179	2.03538	Ak2	NM_016895	Mus musculus adenylate kinase 2 (Ak2), transcript variant 2, mRNA [NM_016895]
A_51_P136888	2.03387	Rb1	NM_009029	Mus musculus retinoblastoma 1 (Rb1), mRNA [NM_009029]
A_51_P423608	2.03327	Tmem20	NM_175507	Mus musculus transmembrane protein 20 (Tmem20), mRNA [NM_175507]
A_52_P180855	2.02941	Neb	XM_988050	PREDICTED: Mus musculus nebulin (Neb), mRNA [XM_988050]
A_52_P578768	2.02911	9130023D20Rik	NM_178746	Mus musculus RIKEN cDNA 9130023D20 gene (9130023D20Rik), mRNA [NM_178746]
A_51_P215627	2.02855	Plac9	NM_207229	Mus musculus placenta specific 9 (Plac9), mRNA [NM_207229]
A_52_P413584	2.02784	Nrip1	BC062260	Mus musculus nuclear receptor interacting protein 1, mRNA (cDNA clone IMAGE:820587). [BC062260]
A_51_P311434	2.02735	Cyb5	NM_025797	Mus musculus cytochrome b-5 (Cyb5), mRNA [NM_025797]
A_51_P248666	2.02707	Cd274	NM_021893	Mus musculus CD274 antigen (Cd274), mRNA [NM_021893]
A_52_P6092	2.02688	D330050I23Rik	DV071613	VP01_10_A16.x1 FH VP01 Mus musculus cDNA clone VP01_10_A16, mRNA sequence [DV071613]
A_51_P277536	2.02639	Ramp2	NM_019444	Mus musculus receptor (calcitonin) activity modifying protein 2 (Ramp2), mRNA [NM_019444]
A_51_P489522	2.02561	Ctla2b	AK150917	Mus musculus bone marrow macrophage cDNA, RIKEN full-length enriched library, clone:I830018E13 product:cytotoxic T lymphocyte-associated protein 2 beta, full insert sequence. [AK150917]
A_51_P275233	2.02525	Zbtb4	AK147212	Mus musculus 16 days embryo whole body cDNA, RIKEN full-length enriched library, clone:M421004K18 product:KAISO-like zinc finger protein 1 homolog [Homo sapiens], full insert sequence. [AK147212]
A_52_P559557	2.02445	BC026585	NM_001033284	Mus musculus cDNA sequence BC026585 (BC026585), mRNA [NM_001033284]
A_51_P205385	2.02351	Uox	NM_009474	Mus musculus urate oxidase (Uox), mRNA [NM_009474]
A_51_P222657	2.02265	Tspo	NM_009775	Mus musculus translocator protein (Tspo), mRNA [NM_009775]
A_51_P435348	2.02247	Tmem159	NM_145586	Mus musculus transmembrane protein 159 (Tmem159), mRNA [NM_145586]
A_52_P520375	2.02174	Heg1	NM_175256	Mus musculus HEG homolog 1 (zebrafish) (Heg1), mRNA [NM_175256]
A_52_P68107	2.02097	Etv3	NM_012051	Mus musculus ets variant gene 3 (Etv3), transcript variant 2, mRNA [NM_012051]
A_51_P250597	2.02034	AK041395	AK041395	Mus musculus 3 days neonate thymus cDNA, RIKEN full-length enriched library, clone:A630006M12 product:a disintegrin-like and metalloprotease (reprolysin type) with thrombospondin type 1 motif, 6, full insert sequence. [AK041395]
A_51_P312348	2.01788	Krt7	AK137217	Mus musculus adult male urinary bladder cDNA, RIKEN full-length enriched library, clone:9530049E07 product:keratin complex 2, basic, gene 7, full insert sequence. [AK137217]
A_51_P242487	2.01722	Tessp2	NM_153099	Mus musculus testis serine protease 2 (Tessp2), mRNA [NM_153099]
A_51_P106538	2.01696	Htra3	NM_030127	Mus musculus HtrA serine peptidase 3 (Htra3), transcript variant 1, mRNA [NM_030127]
A_52_P8444	2.01619	Eif2c4	NM_153177	Mus musculus eukaryotic translation initiation factor 2C, 4 (Eif2c4), mRNA [NM_153177]
A_51_P443344	2.01604	Acyp2	NM_029344	Mus musculus acylphosphatase 2, muscle type (Acyp2), mRNA [NM_029344]
A_52_P112017	2.01544	Tspo	NM_009775	Mus musculus translocator protein (Tspo), mRNA [NM_009775]
A_51_P426276	2.01486	Pdk2	NM_133667	Mus musculus pyruvate dehydrogenase kinase, isoenzyme 2 (Pdk2), mRNA [NM_133667]
A_52_P319774	2.01431	Kcnip4	NM_030265	Mus musculus Kv channel interacting protein 4 (Kcnip4), mRNA [NM_030265]
A_52_P258457	2.01135	Agxt2l2	AK085984	Mus musculus 16 days neonate heart cDNA, RIKEN full-length enriched library, clone:D830038A09 product:hypothetical PLP-dependent transferases structure containing protein, full insert sequence. [AK085984]
A_51_P117794	2.01097	Bik	NM_007546	Mus musculus Bcl2-interacting killer (Bik), mRNA [NM_007546]
A_52_P80944	2.01079	Zfp36	NM_011756	Mus musculus zinc finger protein 36 (Zfp36), mRNA [NM_011756]
A_51_P151902	2.01	Spon1	NM_145584	Mus musculus spondin 1, (f-spondin) extracellular matrix protein (Spon1), mRNA [NM_145584]
A_52_P186362	2.0092	TC1662565		S71509 aldehyde dehydrogenase AHD-M1 {Mus sp.} (exp=-1; wgp=0; cg=0), partial (8%) [TC1662565]
A_51_P367720	2.00916	Clu	NM_013492	Mus musculus clusterin (Clu), mRNA [NM_013492]
A_51_P478172	2.00907	Tcrb-V13	U07661	Mus musculus SJL-4E3 T cell receptor beta chain mRNA, complete cds. [U07661]
A_52_P81270	2.00754	Itga6	NM_008397	Mus musculus integrin alpha 6 (Itga6), mRNA [NM_008397]
A_52_P114962	2.00694	Tcerg1l	NM_183289	Mus musculus transcription elongation regulator 1-like (Tcerg1l), mRNA [NM_183289]
A_51_P441426	2.00649	Cxcl4	NM_019932	Mus musculus chemokine (C-X-C motif) ligand 4 (Cxcl4), mRNA [NM_019932]
A_52_P542013	2.00546	Dock6	NM_177030	Mus musculus dedicator of cytokinesis 6 (Dock6), mRNA [NM_177030]
A_51_P125205	2.0053	Aqp1	NM_007472	Mus musculus aquaporin 1 (Aqp1), mRNA [NM_007472]
A_52_P230938	2.00458	Ly6c	NM_010741	Mus musculus lymphocyte antigen 6 complex, locus C (Ly6c), mRNA [NM_010741]
A_52_P633163	2.00446	Mut	NM_008650	Mus musculus methylmalonyl-Coenzyme A mutase (Mut), mRNA [NM_008650]
A_51_P298178	2.00421	Dctn3	NM_016890	Mus musculus dynactin 3 (Dctn3), mRNA [NM_016890]
A_51_P438805	2.0042	Txnip	NM_023719	Mus musculus thioredoxin interacting protein (Txnip), transcript variant 2, mRNA [NM_023719]
A_51_P380178	2.00387	Id3	NM_008321	Mus musculus inhibitor of DNA binding 3 (Id3), mRNA [NM_008321]
A_51_P264785	2.00381	Ribc2	BC112373	Mus musculus RIB43A domain with coiled-coils 2, mRNA (cDNA clone MGC:130587 IMAGE:40056860), complete cds. [BC112373]
A_51_P211880	2.00333	Mccc2	NM_030026	Mus musculus methylcrotonoyl-Coenzyme A carboxylase 2 (beta) (Mccc2), mRNA [NM_030026]
A_51_P180747	2.0029	Ctla2a	NM_007796	Mus musculus cytotoxic T lymphocyte-associated protein 2 alpha (Ctla2a), mRNA [NM_007796]
A_52_P418489	2.00258	Tinagl	NM_023476	Mus musculus tubulointerstitial nephritis antigen-like (Tinagl), mRNA [NM_023476]
A_52_P223127	2.00176	Synpo2	XM_619958	PREDICTED: Mus musculus synaptopodin 2, transcript variant 1 (Synpo2), mRNA [XM_619958]
A_51_P154513	2.00151	Il17d	NM_145837	Mus musculus interleukin 17D (Il17d), mRNA [NM_145837]
A_51_P124315	2.0014	BC034076	NM_177649	Mus musculus cDNA sequence BC034076 (BC034076), mRNA [NM_177649]

## Sheet: Arnt-Down
ProbeName	Fold Change	GeneSymbol	GenbankAccession	Description
A_52_P10793	0.00425372	Ptn	NM_008973	Mus musculus pleiotrophin (Ptn), mRNA [NM_008973]
A_52_P177324	0.0176547	Dlk1	NM_010052	Mus musculus delta-like 1 homolog (Drosophila) (Dlk1), mRNA [NM_010052]
A_51_P151182	0.0245881	Ifi202b	NM_011940	Mus musculus interferon activated gene 202B (Ifi202b), mRNA [NM_011940]
A_52_P304720	0.0264703	Crlf1	NM_018827	Mus musculus cytokine receptor-like factor 1 (Crlf1), mRNA [NM_018827]
A_51_P506204	0.0270174	Cdh11	NM_009866	Mus musculus cadherin 11 (Cdh11), mRNA [NM_009866]
A_52_P619248	0.0274783	Prl2c5	NM_181852	Mus musculus mitogen regulated protein, proliferin 4 (Mrpplf4), mRNA [NM_181852]
A_51_P144813	0.0333537	Cdkn2a	NM_009877	Mus musculus cyclin-dependent kinase inhibitor 2A (Cdkn2a), transcript variant 1, mRNA [NM_009877]
A_51_P135618	0.0342532	Dlk1	L12721	Mus musculus adipocyte differentiation-associated protein (pref-1) mRNA, complete cds. [L12721]
A_52_P437795	0.0345278	Cdh11	NM_009866	Mus musculus cadherin 11 (Cdh11), mRNA [NM_009866]
A_51_P443062	0.0358615	Tcfap2a	NM_011547	Mus musculus transcription factor AP-2, alpha (Tcfap2a), mRNA [NM_011547]
A_51_P516833	0.037499	Igf2	NM_010514	Mus musculus insulin-like growth factor 2 (Igf2), mRNA [NM_010514]
A_51_P149868	0.0408432	Irx1	NM_010573	Mus musculus Iroquois related homeobox 1 (Drosophila) (Irx1), mRNA [NM_010573]
A_52_P295432	0.0412209	Cxcl5	NM_009141	Mus musculus chemokine (C-X-C motif) ligand 5 (Cxcl5), mRNA [NM_009141]
A_52_P26161	0.0437066	Ptx3	NM_008987	Mus musculus pentraxin related gene (Ptx3), mRNA [NM_008987]
A_51_P516826	0.0460018	Igf2	NM_010514	Mus musculus insulin-like growth factor 2 (Igf2), mRNA [NM_010514]
A_52_P684037	0.0489047	Ncam1	NM_010875	Mus musculus neural cell adhesion molecule 1 (Ncam1), transcript variant 2, mRNA [NM_010875]
A_52_P669035	0.04915	Clca1	NM_009899	Mus musculus chloride channel calcium activated 1 (Clca1), mRNA [NM_009899]
A_51_P302336	0.0532622	Igf2bp3	NM_023670	Mus musculus insulin-like growth factor 2 mRNA binding protein 3 (Igf2bp3), mRNA [NM_023670]
A_51_P201346	0.0557319	Mdm2	NM_010786	Mus musculus transformed mouse 3T3 cell double minute 2 (Mdm2), mRNA [NM_010786]
A_51_P308844	0.0601876	Nrn1	NM_153529	Mus musculus neuritin 1 (Nrn1), mRNA [NM_153529]
A_52_P36315	0.0603623	Eya1	NM_010164	Mus musculus eyes absent 1 homolog (Drosophila) (Eya1), mRNA [NM_010164]
A_51_P121635	0.0649725	Maged2	NM_030700	Mus musculus melanoma antigen, family D, 2 (Maged2), mRNA [NM_030700]
A_51_P220343	0.072482	Wisp1	NM_018865	Mus musculus WNT1 inducible signaling pathway protein 1 (Wisp1), mRNA [NM_018865]
A_52_P469842	0.0726954	Mdm2	NM_010786	Mus musculus transformed mouse 3T3 cell double minute 2 (Mdm2), mRNA [NM_010786]
A_52_P685021	0.0773899	Cxcl12	NM_021704	Mus musculus chemokine (C-X-C motif) ligand 12 (Cxcl12), transcript variant 1, mRNA [NM_021704]
A_51_P183746	0.0780318	Prrx2	NM_009116	Mus musculus paired related homeobox 2 (Prrx2), mRNA [NM_009116]
A_52_P590898	0.0782008	Dnm3os	AB159607	Mus musculus Hag2 mRNA for hypothetical protein, complete cds. [AB159607]
A_51_P515883	0.0791169	Plac8	NM_139198	Mus musculus placenta-specific 8 (Plac8), mRNA [NM_139198]
A_52_P549166	0.0820723	Arsj	NM_173451	Mus musculus arylsulfatase J (Arsj), mRNA [NM_173451]
A_51_P459402	0.0834388	Slc35e3	NM_029875	Mus musculus solute carrier family 35, member E3 (Slc35e3), mRNA [NM_029875]
A_51_P366811	0.0840655	Apod	NM_007470	Mus musculus apolipoprotein D (Apod), mRNA [NM_007470]
A_52_P373912	0.0846713	EG666415	XM_983688	PREDICTED: Mus musculus hypothetical protein LOC666415 (LOC666415), mRNA [XM_983688]
A_52_P264283	0.0850642	Pdgfra	NM_011058	Mus musculus platelet derived growth factor receptor, alpha polypeptide (Pdgfra), transcript variant 1, mRNA [NM_011058]
A_51_P237783	0.0850644	Foxd1	NM_008242	Mus musculus forkhead box D1 (Foxd1), mRNA [NM_008242]
A_51_P499599	0.0868994	Osr2	NM_054049	Mus musculus odd-skipped related 2 (Drosophila) (Osr2), mRNA [NM_054049]
A_51_P381821	0.0872397	Fst	NM_008046	Mus musculus follistatin (Fst), mRNA [NM_008046]
A_51_P141071	0.0899084	Cand2	NM_025958	Mus musculus cullin-associated and neddylation-dissociated 2 (putative) (Cand2), mRNA [NM_025958]
A_51_P505472	0.0904487	Ece2	NM_139293	Mus musculus endothelin converting enzyme 2 (Ece2), mRNA [NM_139293]
A_51_P210885	0.0929822	Sned1	NM_172463	Mus musculus sushi, nidogen and EGF-like domains 1 (Sned1), mRNA [NM_172463]
A_52_P251703	0.093087	Vcan	NM_001081249	Mus musculus versican (Vcan), mRNA [NM_001081249]
A_51_P318192	0.0936685	Gem	NM_010276	Mus musculus GTP binding protein (gene overexpressed in skeletal muscle) (Gem), mRNA [NM_010276]
A_51_P355629	0.093881	Gas2	NM_008087	Mus musculus growth arrest specific 2 (Gas2), mRNA [NM_008087]
A_51_P205907	0.0968376	Flnc	NM_001081185	Mus musculus filamin C, gamma (actin binding protein 280) (Flnc), mRNA [NM_001081185]
A_52_P550147	0.0979876	Sned1	NM_172463	Mus musculus sushi, nidogen and EGF-like domains 1 (Sned1), mRNA [NM_172463]
A_52_P93393	0.0983269	BC049816	NM_198612	Mus musculus cDNA sequence BC049816 (BC049816), mRNA [NM_198612]
A_52_P158772	0.100531	Nrg1	AK031289	Mus musculus 13 days embryo male testis cDNA, RIKEN full-length enriched library, clone:6030402G23 product:unclassifiable, full insert sequence. [AK031289]
A_52_P308723	0.101836	Dnm3os	AB159607	Mus musculus Hag2 mRNA for hypothetical protein, complete cds. [AB159607]
A_52_P424253	0.103922	Col1a2	AK031577	Mus musculus 13 days embryo male testis cDNA, RIKEN full-length enriched library, clone:6030456A07 product:procollagen, type I, alpha 2, full insert sequence. [AK031577]
A_51_P468055	0.106178	Smyd1	NM_009762	Mus musculus SET and MYND domain containing 1 (Smyd1), mRNA [NM_009762]
A_51_P273433	0.106767	Prkg2	NM_008926	Mus musculus protein kinase, cGMP-dependent, type II (Prkg2), mRNA [NM_008926]
A_51_P103586	0.108139	A730054J21Rik	AK043086	Mus musculus 7 days neonate cerebellum cDNA, RIKEN full-length enriched library, clone:A730054J21 product:unclassifiable, full insert sequence. [AK043086]
A_52_P602188	0.10872	Sned1	NM_172463	Mus musculus sushi, nidogen and EGF-like domains 1 (Sned1), mRNA [NM_172463]
A_52_P686383	0.108746	Fgfr4	AF127140	Mus musculus fibroblast growth factor receptor 4 splice variant 17b (Fgfr4) mRNA, partial cds. [AF127140]
A_51_P157083	0.110803	Gas1	NM_008086	Mus musculus growth arrest specific 1 (Gas1), mRNA [NM_008086]
A_51_P468054	0.111344	Smyd1	NM_009762	Mus musculus SET and MYND domain containing 1 (Smyd1), mRNA [NM_009762]
A_52_P286002	0.112673	AW822216	NM_178884	Mus musculus expressed sequence AW822216 (AW822216), mRNA [NM_178884]
A_52_P32121	0.113129	Ckap4	NM_175451	Mus musculus cytoskeleton-associated protein 4 (Ckap4), mRNA [NM_175451]
A_51_P180754	0.113457	Mtap2	M21041	Mouse microtubule-associated protein 2 (MAP2) mRNA, complete cds. [M21041]
A_51_P341736	0.114359	Mmp2	NM_008610	Mus musculus matrix metallopeptidase 2 (Mmp2), mRNA [NM_008610]
A_52_P549985	0.114689	Asb13	AK008728	Mus musculus adult male stomach cDNA, RIKEN full-length enriched library, clone:2210015B19 product:unclassifiable, full insert sequence. [AK008728]
A_51_P496381	0.116758	Ptk7	NM_175168	Mus musculus PTK7 protein tyrosine kinase 7 (Ptk7), mRNA [NM_175168]
A_52_P658611	0.11765	Col1a1	NM_007742	Mus musculus procollagen, type I, alpha 1 (Col1a1), mRNA [NM_007742]
A_51_P203062	0.118055	Enah	NM_010135	Mus musculus enabled homolog (Drosophila) (Enah), transcript variant 1, mRNA [NM_010135]
A_52_P828639	0.118306	A_52_P828639
A_51_P484880	0.120764	Bcl2l11	NM_207680	Mus musculus BCL2-like 11 (apoptosis facilitator) (Bcl2l11), transcript variant 1, mRNA [NM_207680]
A_51_P279583	0.121497	Olfr1245	NM_146788	Mus musculus olfactory receptor 1245 (Olfr1245), mRNA [NM_146788]
A_51_P345022	0.121843	4732456N10Rik	NM_177717	Mus musculus RIKEN cDNA 4732456N10 gene (4732456N10Rik), mRNA [NM_177717]
A_52_P353631	0.122314	Taar9	NM_001010831	Mus musculus trace amine-associated receptor 9 (Taar9), mRNA [NM_001010831]
A_52_P154026	0.123101	Zcwpw1	NM_001005426	Mus musculus zinc finger, CW type with PWWP domain 1 (Zcwpw1), mRNA [NM_001005426]
A_52_P369769	0.123201	Nrg1	NM_178591	Mus musculus neuregulin 1 (Nrg1), mRNA [NM_178591]
A_52_P275700	0.123841	Nr2f1	NM_010151	Mus musculus nuclear receptor subfamily 2, group F, member 1 (Nr2f1), mRNA [NM_010151]
A_51_P314375	0.125316	Serpinc1	NM_080844	Mus musculus serine (or cysteine) peptidase inhibitor, clade C (antithrombin), member 1 (Serpinc1), mRNA [NM_080844]
A_52_P39546	0.126372	Tead2	NM_011565	Mus musculus TEA domain family member 2 (Tead2), mRNA [NM_011565]
A_51_P160544	0.126471	Efemp2	NM_021474	Mus musculus epidermal growth factor-containing fibulin-like extracellular matrix protein 2 (Efemp2), mRNA [NM_021474]
A_52_P214630	0.127446	Sox9	NM_011448	Mus musculus SRY-box containing gene 9 (Sox9), mRNA [NM_011448]
A_51_P209697	0.129682	Atcay	NM_178662	Mus musculus ataxia, cerebellar, Cayman type homolog (human) (Atcay), mRNA [NM_178662]
A_51_P300493	0.130976	Lox	NM_010728	Mus musculus lysyl oxidase (Lox), mRNA [NM_010728]
A_51_P265806	0.132204	Clca2	NM_030601	Mus musculus chloride channel calcium activated 2 (Clca2), mRNA [NM_030601]
A_51_P404077	0.13236	Fzd2	NM_020510	Mus musculus frizzled homolog 2 (Drosophila) (Fzd2), mRNA [NM_020510]
A_52_P78417	0.1327	Cpe	NM_013494	Mus musculus carboxypeptidase E (Cpe), mRNA [NM_013494]
A_51_P225112	0.133187	Egfl8	NM_152922	Mus musculus EGF-like domain 8 (Egfl8), mRNA [NM_152922]
A_51_P409694	0.133424	Psrc1	NM_019976	Mus musculus proline/serine-rich coiled-coil 1 (Psrc1), mRNA [NM_019976]
A_52_P304128	0.134116	Mmp14	NM_008608	Mus musculus matrix metallopeptidase 14 (membrane-inserted) (Mmp14), mRNA [NM_008608]
A_52_P284814	0.135895	Nup107	NM_134010	Mus musculus nucleoporin 107 (Nup107), mRNA [NM_134010]
A_52_P147487	0.1364	Col13a1	NM_007731	Mus musculus procollagen, type XIII, alpha 1 (Col13a1), mRNA [NM_007731]
A_52_P489295	0.136547	Adamts1	NM_009621	Mus musculus a disintegrin-like and metallopeptidase (reprolysin type) with thrombospondin type 1 motif, 1 (Adamts1), mRNA [NM_009621]
A_51_P194273	0.138543	Sgcg	NM_011892	Mus musculus sarcoglycan, gamma (dystrophin-associated glycoprotein) (Sgcg), mRNA [NM_011892]
A_51_P426347	0.139101	Tssk1	NM_009435	Mus musculus testis-specific serine kinase 1 (Tssk1), mRNA [NM_009435]
A_51_P216303	0.139733	Mmp14	NM_008608	Mus musculus matrix metallopeptidase 14 (membrane-inserted) (Mmp14), mRNA [NM_008608]
A_52_P591017	0.140408	Tpbg	NM_011627	Mus musculus trophoblast glycoprotein (Tpbg), mRNA [NM_011627]
A_52_P577484	0.141066	Sox9	NM_011448	Mus musculus SRY-box containing gene 9 (Sox9), mRNA [NM_011448]
A_52_P493112	0.141413	Psrc1	NM_019976	Mus musculus proline/serine-rich coiled-coil 1 (Psrc1), mRNA [NM_019976]
A_52_P635312	0.141961	Irx2	NM_010574	Mus musculus Iroquois related homeobox 2 (Drosophila) (Irx2), mRNA [NM_010574]
A_52_P40244	0.142012	Lce3f	NM_001018079	Mus musculus late cornified envelope 3F (Lce3f), mRNA [NM_001018079]
A_52_P498241	0.142465	Cdkn2b	NM_007670	Mus musculus cyclin-dependent kinase inhibitor 2B (p15, inhibits CDK4) (Cdkn2b), mRNA [NM_007670]
A_51_P118417	0.142677	Scpep1	NM_029023	Mus musculus serine carboxypeptidase 1 (Scpep1), mRNA [NM_029023]
A_51_P424338	0.143636	Nqo1	NM_008706	Mus musculus NAD(P)H dehydrogenase, quinone 1 (Nqo1), mRNA [NM_008706]
A_51_P182303	0.145167	Col1a2	NM_007743	Mus musculus procollagen, type I, alpha 2 (Col1a2), mRNA [NM_007743]
A_51_P224564	0.146095	Ppm1f	NM_176833	Mus musculus protein phosphatase 1F (PP2C domain containing) (Ppm1f), mRNA [NM_176833]
A_52_P681456	0.146969	Rftn2	NM_028713	Mus musculus raftlin family member 2 (Rftn2), mRNA [NM_028713]
A_51_P467953	0.147442	Lrfn4	NM_153388	Mus musculus leucine rich repeat and fibronectin type III domain containing 4 (Lrfn4), mRNA [NM_153388]
A_51_P461429	0.148418	Cyp7b1	NM_007825	Mus musculus cytochrome P450, family 7, subfamily b, polypeptide 1 (Cyp7b1), mRNA [NM_007825]
A_51_P497090	0.148538	2310040A07Rik	BC021944	Mus musculus RIKEN cDNA 2310040A07 gene, mRNA (cDNA clone IMAGE:5097248), complete cds. [BC021944]
A_52_P356170	0.149109	Gapdhs	NM_008085	Mus musculus glyceraldehyde-3-phosphate dehydrogenase, spermatogenic (Gapdhs), mRNA [NM_008085]
A_51_P279505	0.149855	Rybp	NM_019743	Mus musculus RING1 and YY1 binding protein (Rybp), mRNA [NM_019743]
A_51_P422429	0.150413	Mrg1	NM_010825	Mus musculus myeloid ecotropic viral integration site-related gene 1 (Mrg1), mRNA [NM_010825]
A_51_P489192	0.150535	Postn	NM_015784	Mus musculus periostin, osteoblast specific factor (Postn), mRNA [NM_015784]
A_51_P336114	0.150719	Wdr62	BC054747	Mus musculus WD repeat domain 62, mRNA (cDNA clone MGC:65624 IMAGE:6405269), complete cds. [BC054747]
A_52_P283041	0.150837	Smarca1	NM_053123	Mus musculus SWI/SNF related, matrix associated, actin dependent regulator of chromatin, subfamily a, member 1 (Smarca1), mRNA [NM_053123]
A_51_P205290	0.151744	Arhgef10l	NM_172415	Mus musculus Rho guanine nucleotide exchange factor (GEF) 10-like (Arhgef10l), mRNA [NM_172415]
A_52_P568217	0.152282	Enah	AK076131	Mus musculus 10, 11 days embryo whole body cDNA, RIKEN full-length enriched library, clone:2810468A07 product:unclassifiable, full insert sequence [AK076131]
A_51_P371942	0.15247	Pcolce	NM_008788	Mus musculus procollagen C-endopeptidase enhancer protein (Pcolce), mRNA [NM_008788]
A_51_P374726	0.152791	Ptx3	NM_008987	Mus musculus pentraxin related gene (Ptx3), mRNA [NM_008987]
A_52_P217807	0.154052	Dclk1	NM_019978	Mus musculus doublecortin-like kinase 1 (Dclk1), mRNA [NM_019978]
A_51_P493627	0.155119	Tbc1d2b	NM_194334	Mus musculus TBC1 domain family, member 2B (Tbc1d2b), mRNA [NM_194334]
A_52_P536411	0.156128	Cul7	NM_025611	Mus musculus cullin 7 (Cul7), mRNA [NM_025611]
A_52_P684242	0.156359	Col3a1	NM_009930	Mus musculus procollagen, type III, alpha 1 (Col3a1), mRNA [NM_009930]
A_51_P277075	0.15667	Speer3	NM_027650	Mus musculus spermatogenesis associated glutamate (E)-rich protein 3 (Speer3), mRNA [NM_027650]
A_51_P461404	0.157887	Smarca1	NM_053123	Mus musculus SWI/SNF related, matrix associated, actin dependent regulator of chromatin, subfamily a, member 1 (Smarca1), mRNA [NM_053123]
A_51_P165504	0.15857	Twist2	NM_007855	Mus musculus twist homolog 2 (Drosophila) (Twist2), mRNA [NM_007855]
A_52_P262209	0.159746	Atp2a3	NM_016745	Mus musculus ATPase, Ca++ transporting, ubiquitous (Atp2a3), mRNA [NM_016745]
A_51_P262773	0.159831	Cdh2	NM_007664	Mus musculus cadherin 2 (Cdh2), mRNA [NM_007664]
A_52_P63728	0.160159	Osr1	NM_011859	Mus musculus odd-skipped related 1 (Drosophila) (Osr1), mRNA [NM_011859]
A_51_P246001	0.16075	Cpe	NM_013494	Mus musculus carboxypeptidase E (Cpe), mRNA [NM_013494]
A_51_P301930	0.160756	Lrrc17	BC030317	Mus musculus leucine rich repeat containing 17, mRNA (cDNA clone MGC:40896 IMAGE:5372009), complete cds. [BC030317]
A_52_P520495	0.162351	Vcam1	NM_011693	Mus musculus vascular cell adhesion molecule 1 (Vcam1), mRNA [NM_011693]
A_52_P555789	0.162603	Pcdh18	NM_130448	Mus musculus protocadherin 18 (Pcdh18), mRNA [NM_130448]
A_51_P264934	0.1636	Matn4	NM_013592	Mus musculus matrilin 4 (Matn4), mRNA [NM_013592]
A_52_P590535	0.163692	Fbln2	NM_007992	Mus musculus fibulin 2 (Fbln2), transcript variant 1, mRNA [NM_007992]
A_52_P75034	0.164078	9930012K11Rik	NM_001004155	Mus musculus RIKEN cDNA 9930012K11 gene (9930012K11Rik), mRNA [NM_001004155]
A_52_P421713	0.164701	9930012K11Rik	NM_001004155	Mus musculus RIKEN cDNA 9930012K11 gene (9930012K11Rik), mRNA [NM_001004155]
A_52_P208787	0.164892	B230217C12Rik	NM_001080935	Mus musculus RIKEN cDNA B230217C12 gene (B230217C12Rik), mRNA [NM_001080935]
A_51_P230942	0.164993	Runx2	NM_009820	Mus musculus runt related transcription factor 2 (Runx2), mRNA [NM_009820]
A_51_P118415	0.165492	Scpep1	NM_029023	Mus musculus serine carboxypeptidase 1 (Scpep1), mRNA [NM_029023]
A_52_P161297	0.165775	Tcea3	NM_011542	Mus musculus transcription elongation factor A (SII), 3 (Tcea3), mRNA [NM_011542]
A_51_P341369	0.165845	Pqlc1	NM_025861	Mus musculus PQ loop repeat containing 1 (Pqlc1), mRNA [NM_025861]
A_52_P683146	0.166081	Cdh11	NM_009866	Mus musculus cadherin 11 (Cdh11), mRNA [NM_009866]
A_51_P311904	0.16675	Ptk2b	NM_172498	Mus musculus PTK2 protein tyrosine kinase 2 beta (Ptk2b), mRNA [NM_172498]
A_51_P280404	0.166885	Epdr1	NM_134065	Mus musculus ependymin related protein 1 (zebrafish) (Epdr1), mRNA [NM_134065]
A_51_P146168	0.167175	Col12a1	NM_007730	Mus musculus procollagen, type XII, alpha 1 (Col12a1), mRNA [NM_007730]
A_51_P130409	0.167324	Ppp1r13b	NM_011625	Mus musculus protein phosphatase 1, regulatory (inhibitor) subunit 13B (Ppp1r13b), mRNA [NM_011625]
A_52_P24851	0.168026	Pcdhb16	NM_053141	Mus musculus protocadherin beta 16 (Pcdhb16), mRNA [NM_053141]
A_52_P261858	0.16851	Ryr3	NM_177652	Mus musculus ryanodine receptor 3 (Ryr3), mRNA [NM_177652]
A_52_P131249	0.168775	B830017H08Rik	AK080987	Mus musculus 10 days neonate medulla oblongata cDNA, RIKEN full-length enriched library, clone:B830017H08 product:hypothetical protein, full insert sequence [AK080987]
A_52_P555520	0.170667	2410127E18Rik	NM_029742	Mus musculus RIKEN cDNA 2410127E18 gene (2410127E18Rik), mRNA [NM_029742]
A_52_P20906	0.172946	Twist1	NM_011658	Mus musculus twist gene homolog 1 (Drosophila) (Twist1), mRNA [NM_011658]
A_52_P277641	0.175096	Mrg1	NM_010825	Mus musculus myeloid ecotropic viral integration site-related gene 1 (Mrg1), mRNA [NM_010825]
A_52_P656699	0.175167	Actn3	NM_013456	Mus musculus actinin alpha 3 (Actn3), mRNA [NM_013456]
A_51_P334804	0.178	Pnpla5	NM_029427	Mus musculus patatin-like phospholipase domain containing 5 (Pnpla5), mRNA [NM_029427]
A_52_P379631	0.178189	Steap2	NM_028734	Mus musculus six transmembrane epithelial antigen of prostate 2 (Steap2), mRNA [NM_028734]
A_52_P108845	0.179315	Clip3	NM_001081114	Mus musculus CAP-GLY domain containing linker protein 3 (Clip3), mRNA [NM_001081114]
A_51_P137322	0.180093	Cck	NM_031161	Mus musculus cholecystokinin (Cck), mRNA [NM_031161]
A_52_P467814	0.180462	Il1rap	AK045686	Mus musculus adult male corpora quadrigemina cDNA, RIKEN full-length enriched library, clone:B230304B05 product:interleukin 1 receptor accessory protein, full insert sequence [AK045686]
A_51_P191791	0.180943	Pcdhgb4	NM_033576	Mus musculus protocadherin gamma subfamily B, 4 (Pcdhgb4), mRNA [NM_033576]
A_52_P31814	0.181393	1110038B12Rik	CB575847	AGENCOURT_12989880 NIH_MGC_136 Mus musculus cDNA clone IMAGE:30291947 5', mRNA sequence [CB575847]
A_52_P534894	0.182798	Tead3	NM_011566	Mus musculus TEA domain family member 3 (Tead3), mRNA [NM_011566]
A_52_P473966	0.182951	Kdelr3	NM_134090	Mus musculus KDEL (Lys-Asp-Glu-Leu) endoplasmic reticulum protein retention receptor 3 (Kdelr3), mRNA [NM_134090]
A_51_P521010	0.183566	Ppp1r3c	NM_016854	Mus musculus protein phosphatase 1, regulatory (inhibitor) subunit 3C (Ppp1r3c), mRNA [NM_016854]
A_52_P483713	0.184635	Prrx1	NM_011127	Mus musculus paired related homeobox 1 (Prrx1), transcript variant 1, mRNA [NM_011127]
A_51_P467971	0.186861	Ank3	NM_170728	Mus musculus ankyrin 3, epithelial (Ank3), transcript variant 1, mRNA [NM_170728]
A_51_P227739	0.187029	Tead2	NM_011565	Mus musculus TEA domain family member 2 (Tead2), mRNA [NM_011565]
A_52_P195809	0.187308	Bdh2	NM_027208	Mus musculus 3-hydroxybutyrate dehydrogenase, type 2 (Bdh2), mRNA [NM_027208]
A_52_P254316	0.187401	Nfat5	NM_018823	Mus musculus nuclear factor of activated T-cells 5 (Nfat5), transcript variant b, mRNA [NM_018823]
A_51_P209778	0.187498	Prrx1	NM_011127	Mus musculus paired related homeobox 1 (Prrx1), transcript variant 1, mRNA [NM_011127]
A_51_P105178	0.187838	Sox4	NM_009238	Mus musculus SRY-box containing gene 4 (Sox4), mRNA [NM_009238]
A_52_P237371	0.188128	Col5a1	NM_015734	Mus musculus procollagen, type V, alpha 1 (Col5a1), mRNA [NM_015734]
A_52_P454183	0.18988	Olfml2b	NM_177068	Mus musculus olfactomedin-like 2B (Olfml2b), mRNA [NM_177068]
A_51_P255395	0.191478	Col7a1	NM_007738	Mus musculus procollagen, type VII, alpha 1 (Col7a1), mRNA [NM_007738]
A_51_P105078	0.191905	S100a4	NM_011311	Mus musculus S100 calcium binding protein A4 (S100a4), mRNA [NM_011311]
A_51_P108252	0.193304	Gpsm2	NM_029522	Mus musculus G-protein signalling modulator 2 (AGS3-like, C. elegans) (Gpsm2), mRNA [NM_029522]
A_52_P360440	0.193876	Fer1l3	AK086107	Mus musculus 15 days embryo head cDNA, RIKEN full-length enriched library, clone:D930006D18 product:hypothetical C2 domain/C2-domain profile containing protein, full insert sequence. [AK086107]
A_51_P261991	0.194369	Bdnf	NM_007540	Mus musculus brain derived neurotrophic factor (Bdnf), transcript variant 1, mRNA [NM_007540]
A_51_P420731	0.194533	Thy1	NM_009382	Mus musculus thymus cell antigen 1, theta (Thy1), mRNA [NM_009382]
A_51_P162209	0.19572	Tpbg	NM_011627	Mus musculus trophoblast glycoprotein (Tpbg), mRNA [NM_011627]
A_51_P335146	0.197717	H60	NM_010400	Mus musculus histocompatibility 60 (H60), mRNA [NM_010400]
A_51_P373562	0.197837	Fat1	U23536	Mus musculus cadherin-related cell adhesion molecule mRNA, partial cds. [U23536]
A_52_P676686	0.198089	Slc38a2	NM_175121	Mus musculus solute carrier family 38, member 2 (Slc38a2), mRNA [NM_175121]
A_51_P499551	0.198171	Cd276	NM_133983	Mus musculus CD276 antigen (Cd276), mRNA [NM_133983]
A_51_P169173	0.198629	Cdkn1b	NM_009875	Mus musculus cyclin-dependent kinase inhibitor 1B (Cdkn1b), mRNA [NM_009875]
A_52_P78830	0.198917	Bmf	NM_138313	Mus musculus Bcl2 modifying factor (Bmf), mRNA [NM_138313]
A_52_P980244	0.201229	AK083715	AK083715	Mus musculus 9 days embryo whole body cDNA, RIKEN full-length enriched library, clone:D030070D03 product:unclassifiable, full insert sequence. [AK083715]
A_51_P216005	0.201868	Col4a5	NM_007736	Mus musculus procollagen, type IV, alpha 5 (Col4a5), mRNA [NM_007736]
A_51_P503896	0.201925	Pycr1		pyrroline-5-carboxylate reductase 1 [Source:MarkerSymbol;Acc:MGI:2384795] [ENSMUST00000026133]
A_51_P147123	0.20211	Ntn1	NM_008744	Mus musculus netrin 1 (Ntn1), mRNA [NM_008744]
A_52_P26794	0.202248	Basp1	NM_027395	Mus musculus brain abundant, membrane attached signal protein 1 (Basp1), mRNA [NM_027395]
A_51_P479583	0.202816	AW822216	AK029863	Mus musculus adult male testis cDNA, RIKEN full-length enriched library, clone:4931417C03 product:hypothetical Immunoglobulin and major histocompatibility complex domain containing protein, full insert sequence [AK029863]
A_52_P498193	0.203236	Aldh1l2	NM_153543	Mus musculus aldehyde dehydrogenase 1 family, member L2 (Aldh1l2), mRNA [NM_153543]
A_51_P267634	0.203437	Tmem142b	NM_178751	Mus musculus transmembrane protein 142B (Tmem142b), mRNA [NM_178751]
A_52_P525107	0.20369	Col1a1	NM_007742	Mus musculus procollagen, type I, alpha 1 (Col1a1), mRNA [NM_007742]
A_51_P454207	0.20444	Ncoa3	NM_008679	Mus musculus nuclear receptor coactivator 3 (Ncoa3), mRNA [NM_008679]
A_51_P456657	0.205179	Tgif2	NM_173396	Mus musculus TGFB-induced factor 2 (Tgif2), mRNA [NM_173396]
A_52_P223618	0.20527	Rcn3	NM_026555	Mus musculus reticulocalbin 3, EF-hand calcium binding domain (Rcn3), mRNA [NM_026555]
A_51_P213334	0.205675	Hdac11	NM_144919	Mus musculus histone deacetylase 11 (Hdac11), mRNA [NM_144919]
A_51_P428134	0.206735	Lrig3	NM_177152	Mus musculus leucine-rich repeats and immunoglobulin-like domains 3 (Lrig3), mRNA [NM_177152]
A_52_P562704	0.207069	Slc8a1	NM_011406	Mus musculus solute carrier family 8 (sodium/calcium exchanger), member 1 (Slc8a1), mRNA [NM_011406]
A_51_P356512	0.207106	Armcx2	NM_026139	Mus musculus armadillo repeat containing, X-linked 2 (Armcx2), mRNA [NM_026139]
A_51_P209771	0.207343	Prrx1	NM_011127	Mus musculus paired related homeobox 1 (Prrx1), transcript variant 1, mRNA [NM_011127]
A_52_P12023	0.207739	NAP033385-1
A_52_P96151	0.208139	Wdr82	AK037620	Mus musculus 16 days neonate thymus cDNA, RIKEN full-length enriched library, clone:A130030B03 product:hypothetical Trp-Asp (WD) repeats circular profile containing protein, full insert sequence. [AK037620]
A_52_P230167	0.208239	Setbp1	NM_053099	Mus musculus SET binding protein 1 (Setbp1), mRNA [NM_053099]
A_52_P264669	0.208848	Pdlim2	NM_145978	Mus musculus PDZ and LIM domain 2 (Pdlim2), mRNA [NM_145978]
A_52_P363110	0.208949	Fgfr2	NM_010207	Mus musculus fibroblast growth factor receptor 2 (Fgfr2), transcript variant 1, mRNA [NM_010207]
A_52_P6045	0.209088	Gpsm2	NM_029522	Mus musculus G-protein signalling modulator 2 (AGS3-like, C. elegans) (Gpsm2), mRNA [NM_029522]
A_52_P402394	0.210515	Tmem121	NM_153776	Mus musculus transmembrane protein 121 (Tmem121), mRNA [NM_153776]
A_51_P445562	0.213421	Chst10	NM_145142	Mus musculus carbohydrate sulfotransferase 10 (Chst10), mRNA [NM_145142]
A_52_P463271	0.213428	Gmds	NM_146041	Mus musculus GDP-mannose 4, 6-dehydratase (Gmds), mRNA [NM_146041]
A_52_P415319	0.213627	Runx2	NM_009820	Mus musculus runt related transcription factor 2 (Runx2), mRNA [NM_009820]
A_52_P90747	0.214079	Ptprs	NM_011218	Mus musculus protein tyrosine phosphatase, receptor type, S (Ptprs), mRNA [NM_011218]
A_52_P84814	0.214171	Prl2c3	NM_011118	Mus musculus proliferin 2 (Plf2), mRNA [NM_011118]
A_51_P468658	0.21419	Aldh1l2	NM_153543	Mus musculus aldehyde dehydrogenase 1 family, member L2 (Aldh1l2), mRNA [NM_153543]
A_51_P317740	0.214501	Pcgf2	NM_009545	Mus musculus polycomb group ring finger 2 (Pcgf2), mRNA [NM_009545]
A_51_P347448	0.214759	Prdm5	NM_027547	Mus musculus PR domain containing 5 (Prdm5), mRNA [NM_027547]
A_51_P475573	0.214888	Edg2	NM_010336	Mus musculus endothelial differentiation, lysophosphatidic acid G-protein-coupled receptor, 2 (Edg2), mRNA [NM_010336]
A_51_P351273	0.214986	Tcea3	NM_011542	Mus musculus transcription elongation factor A (SII), 3 (Tcea3), mRNA [NM_011542]
A_51_P461877	0.216185	Thbs2	NM_011581	Mus musculus thrombospondin 2 (Thbs2), mRNA [NM_011581]
A_52_P162486	0.216395	Bgn	NM_007542	Mus musculus biglycan (Bgn), mRNA [NM_007542]
A_52_P400436	0.216741	Sphk1	NM_025367	Mus musculus sphingosine kinase 1 (Sphk1), transcript variant 2, mRNA [NM_025367]
A_52_P313285	0.216816	ENSMUST00000078779		solute carrier family 8 (sodium/calcium exchanger), member 1 [Source:MarkerSymbol;Acc:MGI:107956] [ENSMUST00000078779]
A_52_P294253	0.21718	Zfp41	NM_011759	Mus musculus zinc finger protein 41 (Zfp41), transcript variant 1, mRNA [NM_011759]
A_51_P377094	0.21735	Col1a1	NM_007742	Mus musculus procollagen, type I, alpha 1 (Col1a1), mRNA [NM_007742]
A_52_P61735	0.218582	Flnc	NM_001081185	Mus musculus filamin C, gamma (actin binding protein 280) (Flnc), mRNA [NM_001081185]
A_51_P469817	0.219911	A630052E07Rik	AK163070	Mus musculus adult male aorta and vein cDNA, RIKEN full-length enriched library, clone:A530013A09 product:periostin, osteoblast specific factor, full insert sequence [AK163070]
A_51_P495360	0.220065	Mgat3	NM_010795	Mus musculus mannoside acetylglucosaminyltransferase 3 (Mgat3), mRNA [NM_010795]
A_51_P161354	0.220614	Sesn2	NM_144907	Mus musculus sestrin 2 (Sesn2), mRNA [NM_144907]
A_52_P285024	0.221137	Sertad4	NM_198247	Mus musculus SERTA domain containing 4 (Sertad4), mRNA [NM_198247]
A_51_P389864	0.221173	C76566	NM_178879	Mus musculus expressed sequence C76566 (C76566), mRNA [NM_178879]
A_51_P327751	0.221633	Ifit1	NM_008331	Mus musculus interferon-induced protein with tetratricopeptide repeats 1 (Ifit1), mRNA [NM_008331]
A_51_P164203	0.222275	Nme4	NM_019731	Mus musculus expressed in non-metastatic cells 4, protein (Nme4), mRNA [NM_019731]
A_52_P232802	0.222899	Tbx15	NM_009323	Mus musculus T-box 15 (Tbx15), mRNA [NM_009323]
A_52_P184149	0.222919	Mthfd2	NM_008638	Mus musculus methylenetetrahydrofolate dehydrogenase (NAD+ dependent), methenyltetrahydrofolate cyclohydrolase (Mthfd2), mRNA [NM_008638]
A_51_P295635	0.222957	D730050B12Rik	BY730955	BY730955 RIKEN full-length enriched, 10 days lactation, adult female mammary gland Mus musculus cDNA clone D730050B12 5'. [BY730955]
A_52_P472233	0.223816	Fcho1	NM_028715	Mus musculus FCH domain only 1 (Fcho1), mRNA [NM_028715]
A_51_P370700	0.22416	Got1	NM_010324	Mus musculus glutamate oxaloacetate transaminase 1, soluble (Got1), mRNA [NM_010324]
A_51_P450955	0.224232	1110036O03Rik	NM_176830	Mus musculus RIKEN cDNA 1110036O03 gene (1110036O03Rik), mRNA [NM_176830]
A_51_P462364	0.224694	Freq	NM_019681	Mus musculus frequenin homolog (Drosophila) (Freq), mRNA [NM_019681]
A_52_P684050	0.225239	5430432M24Rik	NM_028666	Mus musculus RIKEN cDNA 5430432M24 gene (5430432M24Rik), transcript variant 1, mRNA [NM_028666]
A_51_P355957	0.226102	Gdpd2	NM_023608	Mus musculus glycerophosphodiester phosphodiesterase domain containing 2 (Gdpd2), mRNA [NM_023608]
A_52_P26991	0.226105	Dclk1	BC050903	Mus musculus doublecortin-like kinase 1, mRNA (cDNA clone IMAGE:6416546), complete cds. [BC050903]
A_52_P220485	0.227124	Uhrf2	NM_144873	Mus musculus ubiquitin-like, containing PHD and RING finger domains 2 (Uhrf2), mRNA [NM_144873]
A_51_P183111	0.227599	Olfr531	NM_146953	Mus musculus olfactory receptor 531 (Olfr531), mRNA [NM_146953]
A_51_P507290	0.227685	Klf5	NM_009769	Mus musculus Kruppel-like factor 5 (Klf5), mRNA [NM_009769]
A_52_P650908	0.2282	Cplx2	NM_009946	Mus musculus complexin 2 (Cplx2), mRNA [NM_009946]
A_52_P563818	0.228552	Dclk1	NM_019978	Mus musculus doublecortin-like kinase 1 (Dclk1), mRNA [NM_019978]
A_52_P369232	0.228644	Cct2	NM_007636	Mus musculus chaperonin subunit 2 (beta) (Cct2), mRNA [NM_007636]
A_51_P466910	0.22942	Cacna1g	NM_009783	Mus musculus calcium channel, voltage-dependent, T type, alpha 1G subunit (Cacna1g), mRNA [NM_009783]
A_51_P187302	0.230753	Tns3	NM_001083587	Mus musculus tensin 3 (Tns3), mRNA [NM_001083587]
A_51_P507602	0.230856	Clca4	NM_139148	Mus musculus chloride channel calcium activated 4 (Clca4), mRNA [NM_139148]
A_51_P162008	0.23198	Adamts12	NM_175501	Mus musculus a disintegrin-like and metallopeptidase (reprolysin type) with thrombospondin type 1 motif, 12 (Adamts12), mRNA [NM_175501]
A_51_P343356	0.232162	Isoc2b	NM_026158	Mus musculus isochorismatase domain containing 2b (Isoc2b), mRNA [NM_026158]
A_51_P175841	0.233083	Gfpt1	NM_013528	Mus musculus glutamine fructose-6-phosphate transaminase 1 (Gfpt1), mRNA [NM_013528]
A_51_P139848	0.23382	Wbp5	NM_011712	Mus musculus WW domain binding protein 5 (Wbp5), mRNA [NM_011712]
A_51_P512384	0.234485	Timp1	NM_011593	Mus musculus tissue inhibitor of metalloproteinase 1 (Timp1), transcript variant 2, mRNA [NM_011593]
A_51_P246773	0.234503	Sesn3	NM_030261	Mus musculus sestrin 3 (Sesn3), mRNA [NM_030261]
A_51_P114062	0.235199	Freq	NM_019681	Mus musculus frequenin homolog (Drosophila) (Freq), mRNA [NM_019681]
A_52_P450045	0.235576	Rnf12	NM_011276	Mus musculus ring finger protein 12 (Rnf12), mRNA [NM_011276]
A_51_P345649	0.236384	Pdgfra	NM_011058	Mus musculus platelet derived growth factor receptor, alpha polypeptide (Pdgfra), transcript variant 1, mRNA [NM_011058]
A_51_P437027	0.236399	Cdk4	NM_009870	Mus musculus cyclin-dependent kinase 4 (Cdk4), mRNA [NM_009870]
A_51_P142813	0.236429	Aspn	NM_025711	Mus musculus asporin (Aspn), mRNA [NM_025711]
A_51_P414085	0.237125	4930429A22Rik	NM_153530	Mus musculus RIKEN cDNA 4930429A22 gene (4930429A22Rik), mRNA [NM_153530]
A_51_P180159	0.237624	Igh	BC004786	Mus musculus immunoglobulin heavy chain complex, mRNA (cDNA clone MGC:6727 IMAGE:3588636), complete cds. [BC004786]
A_51_P520849	0.237766	Sfrp2	NM_009144	Mus musculus secreted frizzled-related protein 2 (Sfrp2), mRNA [NM_009144]
A_52_P390114	0.237785	Eif4b	NM_145625	Mus musculus eukaryotic translation initiation factor 4B (Eif4b), mRNA [NM_145625]
A_51_P325165	0.23861	Il27	NM_145636	Mus musculus interleukin 27 (Il27), mRNA [NM_145636]
A_51_P112762	0.238779	Slc5a3	NM_017391	Mus musculus solute carrier family 5 (inositol transporters), member 3 (Slc5a3), mRNA [NM_017391]
A_52_P475805	0.239282	Col12a1	NM_007730	Mus musculus procollagen, type XII, alpha 1 (Col12a1), mRNA [NM_007730]
A_52_P314940	0.240127	Zfp251	NM_001007568	Mus musculus zinc finger protein 251 (Zfp251), mRNA [NM_001007568]
A_51_P416126	0.240147	Chd3	NM_146019	Mus musculus chromodomain helicase DNA binding protein 3 (Chd3), mRNA [NM_146019]
A_51_P191743	0.240893	Pcdhb16	NM_053141	Mus musculus protocadherin beta 16 (Pcdhb16), mRNA [NM_053141]
A_52_P387724	0.241947	Tcf3	NM_009332	Mus musculus transcription factor 3 (Tcf3), transcript variant 2, mRNA [NM_009332]
A_52_P35801	0.242057	Marcksl1	NM_010807	Mus musculus MARCKS-like 1 (Marcksl1), mRNA [NM_010807]
A_51_P302256	0.242691	Dlg4	NM_007864	Mus musculus discs, large homolog 4 (Drosophila) (Dlg4), mRNA [NM_007864]
A_52_P129456	0.242964	Steap2	NM_028734	Mus musculus six transmembrane epithelial antigen of prostate 2 (Steap2), mRNA [NM_028734]
A_51_P447287	0.243141	Fkbp14	NM_153573	Mus musculus FK506 binding protein 14 (Fkbp14), mRNA [NM_153573]
A_51_P340027	0.243403	Pappa	NM_021362	Mus musculus pregnancy-associated plasma protein A (Pappa), mRNA [NM_021362]
A_52_P409833	0.24348	Plat	NM_008872	Mus musculus plasminogen activator, tissue (Plat), mRNA [NM_008872]
A_52_P507802	0.243657	Edg2	NM_010336	Mus musculus endothelial differentiation, lysophosphatidic acid G-protein-coupled receptor, 2 (Edg2), mRNA [NM_010336]
A_52_P5454	0.244094	Cd248	NM_054042	Mus musculus CD248 antigen, endosialin (Cd248), mRNA [NM_054042]
A_51_P415220	0.2449	Zmat3	NM_009517	Mus musculus zinc finger matrin type 3 (Zmat3), mRNA [NM_009517]
A_51_P459070	0.245214	2010301N04Rik	NM_024251	Mus musculus RIKEN cDNA 2010301N04 gene (2010301N04Rik), mRNA [NM_024251]
A_52_P300730	0.246608	Hmga2	NM_010441	Mus musculus high mobility group AT-hook 2 (Hmga2), mRNA [NM_010441]
A_51_P410581	0.247257	Hdgfrp3	NM_013886	Mus musculus hepatoma-derived growth factor, related protein 3 (Hdgfrp3), mRNA [NM_013886]
A_51_P363914	0.248369	Cct2	NM_007636	Mus musculus chaperonin subunit 2 (beta) (Cct2), mRNA [NM_007636]
A_51_P295355	0.248779	Creb3l1	NM_011957	Mus musculus cAMP responsive element binding protein 3-like 1 (Creb3l1), mRNA [NM_011957]
A_51_P276418	0.248894	Rab6b	NM_173781	Mus musculus RAB6B, member RAS oncogene family (Rab6b), mRNA [NM_173781]
A_52_P136966	0.249228	Ift74	NM_026319	Mus musculus intraflagellar transport 74 homolog (Chlamydomonas) (Ift74), mRNA [NM_026319]
A_52_P493509	0.249695	NAP030253-1
A_51_P165087	0.249848	Snai1	NM_011427	Mus musculus snail homolog 1 (Drosophila) (Snai1), mRNA [NM_011427]
A_52_P573586	0.249912	Col6a3	NM_009935	Mus musculus procollagen, type VI, alpha 3 (Col6a3), mRNA [NM_009935]
A_51_P353056	0.250462	Fat4	NM_183221	Mus musculus FAT tumor suppressor homolog 4 (Drosophila) (Fat4), mRNA [NM_183221]
A_52_P92490	0.250536	Ube1l2	NM_172712	Mus musculus ubiquitin-activating enzyme E1-like 2 (Ube1l2), mRNA [NM_172712]
A_51_P517843	0.251401	Glipr2	NM_027450	Mus musculus GLI pathogenesis-related 2 (Glipr2), mRNA [NM_027450]
A_52_P598309	0.251439	1500012F01Rik	NM_001081005	Mus musculus RIKEN cDNA 1500012F01 gene (1500012F01Rik), mRNA [NM_001081005]
A_51_P158210	0.251861	Mcm2	NM_008564	Mus musculus minichromosome maintenance deficient 2 mitotin (S. cerevisiae) (Mcm2), mRNA [NM_008564]
A_52_P197731	0.252073	2700007P21Rik	NM_173750	Mus musculus RIKEN cDNA 2700007P21 gene (2700007P21Rik), transcript variant 2, mRNA [NM_173750]
A_51_P499876	0.252409	Edg5	L20334	Mouse EDG-like receptor mRNA, partial cds. [L20334]
A_52_P379531	0.252518	Timeless	NM_011589	Mus musculus timeless homolog (Drosophila) (Timeless), mRNA [NM_011589]
A_51_P399664	0.252998	Cttn	NM_007803	Mus musculus cortactin (Cttn), mRNA [NM_007803]
A_51_P125825	0.253327	Dzip1	NM_025943	Mus musculus DAZ interacting protein 1 (Dzip1), mRNA [NM_025943]
A_51_P352968	0.25369	Marcks	NM_008538	Mus musculus myristoylated alanine rich protein kinase C substrate (Marcks), mRNA [NM_008538]
A_51_P383293	0.254498	3110079O15Rik	AK014261	Mus musculus 13 days embryo head cDNA, RIKEN full-length enriched library, clone:3110079O15 product:hypothetical protein, full insert sequence. [AK014261]
A_52_P460545	0.254605	Runx2	NM_009820	Mus musculus runt related transcription factor 2 (Runx2), mRNA [NM_009820]
A_52_P574140	0.255365	Angpt1	NM_009640	Mus musculus angiopoietin 1 (Angpt1), mRNA [NM_009640]
A_51_P202911	0.255777	2810022L02Rik	NM_144882	Mus musculus RIKEN cDNA 2810022L02 gene (2810022L02Rik), mRNA [NM_144882]
A_52_P612137	0.256129	Runx1t1	NM_009822	Mus musculus runt-related transcription factor 1; translocated to, 1 (cyclin D-related) (Runx1t1), mRNA [NM_009822]
A_51_P425352	0.256243	Jph4	NM_177049	Mus musculus junctophilin 4 (Jph4), transcript variant a, mRNA [NM_177049]
A_52_P26195	0.256309	Meis1	NM_010789	Mus musculus myeloid ecotropic viral integration site 1 (Meis1), mRNA [NM_010789]
A_51_P216965	0.256741	Fkbp10	NM_010221	Mus musculus FK506 binding protein 10 (Fkbp10), mRNA [NM_010221]
A_52_P162298	0.256963	1810015A11Rik	NM_026940	Mus musculus RIKEN cDNA 1810015A11 gene (1810015A11Rik), mRNA [NM_026940]
A_52_P673307	0.257062	2610044O15Rik	NM_153780	Mus musculus RIKEN cDNA 2610044O15 gene (2610044O15Rik), mRNA [NM_153780]
A_52_P321875	0.257107	Rpl31	NM_053257	Mus musculus ribosomal protein L31 (Rpl31), mRNA [NM_053257]
A_52_P611610	0.257219	Cacna1g	NM_009783	Mus musculus calcium channel, voltage-dependent, T type, alpha 1G subunit (Cacna1g), mRNA [NM_009783]
A_52_P228551	0.25842	Gpr176	NM_201367	Mus musculus G protein-coupled receptor 176 (Gpr176), mRNA [NM_201367]
A_51_P229833	0.259486	Agrn	U84407	Mus musculus agrin precursor, mRNA, mature peptide, partial cds. [U84407]
A_51_P321385	0.260185	Amot	NM_153319	Mus musculus angiomotin (Amot), mRNA [NM_153319]
A_51_P243246	0.262462	Slc7a1	NM_007513	Mus musculus solute carrier family 7 (cationic amino acid transporter, y+ system), member 1 (Slc7a1), mRNA [NM_007513]
A_51_P327642	0.262653	BC003993	NM_030560	Mus musculus cDNA sequence BC003993 (BC003993), mRNA [NM_030560]
A_52_P395397	0.26269	Aars	NM_146217	Mus musculus alanyl-tRNA synthetase (Aars), mRNA [NM_146217]
A_52_P232909	0.262853	Rps28	NM_016844	Mus musculus ribosomal protein S28 (Rps28), mRNA [NM_016844]
A_52_P417489	0.263215	Cdk6	NM_009873	Mus musculus cyclin-dependent kinase 6 (Cdk6), mRNA [NM_009873]
A_51_P236836	0.264102	Layn	BC139816	Mus musculus layilin, mRNA (cDNA clone MGC:161835 IMAGE:40140447), complete cds [BC139816]
A_51_P257550	0.264253	Marcksl1	NM_010807	Mus musculus MARCKS-like 1 (Marcksl1), mRNA [NM_010807]
A_52_P55271	0.264355	Rps28	NM_016844	Mus musculus ribosomal protein S28 (Rps28), mRNA [NM_016844]
A_51_P427663	0.264484	Cnn2	NM_007725	Mus musculus calponin 2 (Cnn2), mRNA [NM_007725]
A_51_P117162	0.265285	Cbx3	NM_007624	Mus musculus chromobox homolog 3 (Drosophila HP1 gamma) (Cbx3), mRNA [NM_007624]
A_51_P341664	0.266084	Zfp87	NM_133228	Mus musculus zinc finger protein 87 (Zfp87), mRNA [NM_133228]
A_52_P653184	0.266113	EG668623		similar to Hippocalcin-like protein 1 (Visinin-like protein 3) (VILIP-3) (Neural visinin-like protein 3) (NVL-3) (NVP-3) (LOC673264), mRNA [Source:RefSeq_dna;Acc:XR_004180] [ENSMUST00000095805]
A_51_P452637	0.267835	Ppm2c	NM_001033453	Mus musculus protein phosphatase 2C, magnesium dependent, catalytic subunit (Ppm2c), mRNA [NM_001033453]
A_51_P419439	0.268651	Gnmt	NM_010321	Mus musculus glycine N-methyltransferase (Gnmt), mRNA [NM_010321]
A_52_P326354	0.268679	Erf	NM_010155	Mus musculus Ets2 repressor factor (Erf), mRNA [NM_010155]
A_51_P231482	0.268981	Igsf3	AK019524	Mus musculus 0 day neonate head cDNA, RIKEN full-length enriched library, clone:4833439O17 product:RIKEN cDNA 4833439O17 gene, full insert sequence [AK019524]
A_52_P297731	0.269556	Ube2i	NM_011665	Mus musculus ubiquitin-conjugating enzyme E2I (Ube2i), mRNA [NM_011665]
A_51_P215106	0.269902	Fstl1	NM_008047	Mus musculus follistatin-like 1 (Fstl1), mRNA [NM_008047]
A_51_P368543	0.270374	Abhd8	NM_022419	Mus musculus abhydrolase domain containing 8 (Abhd8), mRNA [NM_022419]
A_51_P201196	0.271626	A930006D11Rik	NM_177790	Mus musculus RIKEN cDNA A930006D11Rik gene (A930006D11Rik), mRNA [NM_177790]
A_51_P335671	0.271651	Rps28	CA467389	AGENCOURT_10736058 NIH_MGC_156 Mus musculus cDNA clone IMAGE:6788310 5', mRNA sequence [CA467389]
A_51_P279100	0.272064	Ptgs1	NM_008969	Mus musculus prostaglandin-endoperoxide synthase 1 (Ptgs1), mRNA [NM_008969]
A_51_P475785	0.272088	BC052040	NM_207264	Mus musculus cDNA sequence BC052040 (BC052040), mRNA [NM_207264]
A_52_P14810	0.27229	Chd3	NM_146019	Mus musculus chromodomain helicase DNA binding protein 3 (Chd3), mRNA [NM_146019]
A_51_P289423	0.272983	NAP057047-1
A_51_P363258	0.272985	Prss22	NM_133731	Mus musculus protease, serine, 22 (Prss22), mRNA [NM_133731]
A_51_P219868	0.273106	Dnm1	NM_010065	Mus musculus dynamin 1 (Dnm1), mRNA [NM_010065]
A_52_P479249	0.27319	Thy1	NM_009382	Mus musculus thymus cell antigen 1, theta (Thy1), mRNA [NM_009382]
A_51_P451606	0.273545	Sox9	NM_011448	Mus musculus SRY-box containing gene 9 (Sox9), mRNA [NM_011448]
A_51_P107686	0.273589	Foxc1	NM_008592	Mus musculus forkhead box C1 (Foxc1), mRNA [NM_008592]
A_51_P385054	0.273833	Pak1	NM_011035	Mus musculus p21 (CDKN1A)-activated kinase 1 (Pak1), mRNA [NM_011035]
A_51_P409010	0.273958	Comp	NM_016685	Mus musculus cartilage oligomeric matrix protein (Comp), mRNA [NM_016685]
A_52_P213916	0.274119	Onecut2	NM_194268	Mus musculus one cut domain, family member 2 (Onecut2), mRNA [NM_194268]
A_52_P197926	0.274133	Rpl36a	NM_019865	Mus musculus ribosomal protein L36a (Rpl36a), mRNA [NM_019865]
A_51_P471058	0.275231	Mrc2	NM_008626	Mus musculus mannose receptor, C type 2 (Mrc2), mRNA [NM_008626]
A_52_P610885	0.275433	Naalad2	NM_028279	Mus musculus N-acetylated alpha-linked acidic dipeptidase 2 (Naalad2), mRNA [NM_028279]
A_51_P191100	0.275485	Rtdr1	AK017008	Mus musculus adult male testis cDNA, RIKEN full-length enriched library, clone:4933431K05 product:hypothetical ARM repeat structure containing protein, full insert sequence. [AK017008]
A_52_P708817	0.275594	BF160261	BF160261	601771184F1 NCI_CGAP_Lu29 Mus musculus cDNA clone IMAGE:3990212 5'. [BF160261]
A_52_P361165	0.275974	Ass1	NM_007494	Mus musculus argininosuccinate synthetase 1 (Ass1), mRNA [NM_007494]
A_52_P334562	0.276082	Vdr	NM_009504	Mus musculus vitamin D receptor (Vdr), mRNA [NM_009504]
A_51_P104012	0.276102	Tmem158	NM_001002267	Mus musculus transmembrane protein 158 (Tmem158), mRNA [NM_001002267]
A_52_P21353	0.276455	Sept5	NM_213614	Mus musculus septin 5 (Sept5), mRNA [NM_213614]
A_52_P155805	0.276884	2010204K13Rik	AK008437	Mus musculus adult male small intestine cDNA, RIKEN full-length enriched library, clone:2010204K13 product:unclassifiable, full insert sequence. [AK008437]
A_52_P85020	0.277208	Gadd45gip1	NM_183358	Mus musculus growth arrest and DNA-damage-inducible, gamma interacting protein 1 (Gadd45gip1), mRNA [NM_183358]
A_52_P6057	0.277221	Chst2	AK048226	Mus musculus 16 days embryo head cDNA, RIKEN full-length enriched library, clone:C130041E03 product:unclassifiable, full insert sequence [AK048226]
A_52_P599578	0.277389	Cald1	NM_145575	Mus musculus caldesmon 1 (Cald1), mRNA [NM_145575]
A_51_P405227	0.277442	Nradd	NM_026012	Mus musculus neurotrophin receptor associated death domain (Nradd), mRNA [NM_026012]
A_51_P353946	0.278389	Il11ra1	NM_010549	Mus musculus interleukin 11 receptor, alpha chain 1 (Il11ra1), mRNA [NM_010549]
A_52_P444864	0.278699	Smo	NM_176996	Mus musculus smoothened homolog (Drosophila) (Smo), mRNA [NM_176996]
A_51_P169401	0.278737	Lrp6	NM_008514	Mus musculus low density lipoprotein receptor-related protein 6 (Lrp6), mRNA [NM_008514]
A_52_P348720	0.278924	Rhobtb3	NM_028493	Mus musculus Rho-related BTB domain containing 3 (Rhobtb3), mRNA [NM_028493]
A_51_P281582	0.279977	Lrrc42	NM_029985	Mus musculus leucine rich repeat containing 42 (Lrrc42), mRNA [NM_029985]
A_52_P631889	0.279996	Tfpi	NM_011576	Mus musculus tissue factor pathway inhibitor (Tfpi), mRNA [NM_011576]
A_52_P395544	0.280037	ENSMUST00000096268		PREDICTED: Mus musculus similar to Cell division protein kinase 4 (Cyclin-dependent kinase 4) (PSK-J3) (CRK3) (LOC635412), mRNA [XR_003006]
A_51_P282584	0.280271	Olfml2b	NM_177068	Mus musculus olfactomedin-like 2B (Olfml2b), mRNA [NM_177068]
A_52_P514488	0.282722	Exoc3l	NM_177788	Mus musculus exocyst complex component 3-like (Exoc3l), mRNA [NM_177788]
A_51_P418560	0.282875	Lnx2	NM_080795	Mus musculus ligand of numb-protein X 2 (Lnx2), mRNA [NM_080795]
A_51_P382524	0.283035	Atp8b2	NM_001081182	Mus musculus Atpase, class I, type 8B, member 2 (Atp8b2), mRNA [NM_001081182]
A_51_P282144	0.284022	Adam23	NM_011780	Mus musculus a disintegrin and metallopeptidase domain 23 (Adam23), mRNA [NM_011780]
A_52_P319265	0.284058	Sept6	NM_019942	Mus musculus septin 6 (Sept6), mRNA [NM_019942]
A_52_P533673	0.284427	NAP120816-001
A_52_P551526	0.284849	LOC382344		PREDICTED: Mus musculus similar to 60S ribosomal protein L12 (LOC671640), mRNA [XR_003506]
A_51_P144180	0.285943	Ifnb1	NM_010510	Mus musculus interferon beta 1, fibroblast (Ifnb1), mRNA [NM_010510]
A_52_P392121	0.286213	Cbx6	NM_028763	Mus musculus chromobox homolog 6 (Cbx6), mRNA [NM_028763]
A_52_P67088	0.28671	Nme4	NM_019731	Mus musculus expressed in non-metastatic cells 4, protein (Nme4), mRNA [NM_019731]
A_51_P412595	0.287021	Eef1b2	NM_018796	Mus musculus eukaryotic translation elongation factor 1 beta 2 (Eef1b2), mRNA [NM_018796]
A_51_P276051	0.287125	Micall2	NM_174850	Mus musculus MICAL-like 2 (Micall2), mRNA [NM_174850]
A_51_P496569	0.287144	Slit2	NM_178804	Mus musculus slit homolog 2 (Drosophila) (Slit2), mRNA [NM_178804]
A_51_P283920	0.28723	Rpl36a	NM_019865	Mus musculus ribosomal protein L36a (Rpl36a), mRNA [NM_019865]
A_52_P57013	0.287383	Nxn	NM_008750	Mus musculus nucleoredoxin (Nxn), mRNA [NM_008750]
A_52_P372013	0.288566	Zfp9	NM_011763	Mus musculus zinc finger protein 9 (Zfp9), mRNA [NM_011763]
A_52_P648573	0.289741	Scyl1bp1	NM_178883	Mus musculus SCY1-like 1 binding protein 1 (Scyl1bp1), mRNA [NM_178883]
A_51_P441022	0.289965	Smad3	NM_016769	Mus musculus MAD homolog 3 (Drosophila) (Smad3), mRNA [NM_016769]
A_52_P42069	0.290416	Prokr1	NM_021381	Mus musculus prokineticin receptor 1 (Prokr1), mRNA [NM_021381]
A_52_P92472	0.290979	ENSMUST00000037357
A_51_P210956	0.291257	Vcam1	NM_011693	Mus musculus vascular cell adhesion molecule 1 (Vcam1), mRNA [NM_011693]
A_51_P188271	0.291879	Cd248	NM_054042	Mus musculus CD248 antigen, endosialin (Cd248), mRNA [NM_054042]
A_51_P177562	0.292042	Cpt1c	NM_153679	Mus musculus carnitine palmitoyltransferase 1c (Cpt1c), mRNA [NM_153679]
A_52_P597634	0.292131	Fzd1	NM_021457	Mus musculus frizzled homolog 1 (Drosophila) (Fzd1), mRNA [NM_021457]
A_51_P342227	0.292246	Yeats4	NM_026570	Mus musculus YEATS domain containing 4 (Yeats4), mRNA [NM_026570]
A_51_P356023	0.292287	Rpl12	NM_009076	Mus musculus ribosomal protein L12 (Rpl12), mRNA [NM_009076]
A_52_P673043	0.292575	Tph2	NM_173391	Mus musculus tryptophan hydroxylase 2 (Tph2), mRNA [NM_173391]
A_51_P317225	0.292938	Cmtm2a	NM_027022	Mus musculus CKLF-like MARVEL transmembrane domain containing 2A (Cmtm2a), mRNA [NM_027022]
A_52_P516130	0.293079	Tmem164	NM_177592	Mus musculus transmembrane protein 164 (Tmem164), mRNA [NM_177592]
A_51_P334739	0.293289	Cdon	NM_021339	Mus musculus cell adhesion molecule-related/down-regulated by oncogenes (Cdon), mRNA [NM_021339]
A_51_P295848	0.294381	Bai1	NM_174991	Mus musculus brain-specific angiogenesis inhibitor 1 (Bai1), mRNA [NM_174991]
A_51_P407248	0.295262	Antxr1	NM_054041	Mus musculus anthrax toxin receptor 1 (Antxr1), mRNA [NM_054041]
A_52_P277205	0.295491	Adam23	NM_011780	Mus musculus a disintegrin and metallopeptidase domain 23 (Adam23), mRNA [NM_011780]
A_52_P103732	0.297425	Olfr741	NM_207133	Mus musculus olfactory receptor 741 (Olfr741), mRNA [NM_207133]
A_51_P434685	0.297769	EG625603	BC011413	Mus musculus predicted gene, EG625603, mRNA (cDNA clone MGC:6876 IMAGE:2651405), complete cds. [BC011413]
A_51_P184991	0.298323	Wdr64	AK015753	Mus musculus adult male testis cDNA, RIKEN full-length enriched library, clone:4930511H01 product:hypothetical Trp-Asp (WD) repeats profile [AK015753]
A_51_P338713	0.298742	Ass1	M31690	Mouse argininosuccinate synthetase (Ass) mRNA, complete cds. [M31690]
A_52_P81478	0.298772	Ttc26	NM_153600	Mus musculus tetratricopeptide repeat domain 26 (Ttc26), mRNA [NM_153600]
A_52_P72718	0.298936	Lrrc42	NM_029985	Mus musculus leucine rich repeat containing 42 (Lrrc42), mRNA [NM_029985]
A_52_P614762	0.299124	Bad	AK029400	Mus musculus 0 day neonate head cDNA, RIKEN full-length enriched library, clone:4833429M11 product:Bcl-associated death promoter, full insert sequence. [AK029400]
A_51_P419711	0.299201	Tmsb10	NM_025284	Mus musculus thymosin, beta 10 (Tmsb10), mRNA [NM_025284]
A_51_P200610	0.299361	Zbtb12	NM_198886	Mus musculus zinc finger and BTB domain containing 12 (Zbtb12), mRNA [NM_198886]
A_51_P366867	0.29942	Gas5	X59728	M.musculus mRNA for gas5 growth arrest specific protein. [X59728]
A_52_P27225	0.299629	Plec1	NM_201389	Mus musculus plectin 1 (Plec1), transcript variant 6, mRNA [NM_201389]
A_51_P194704	0.299646	Tusc3	BC003311	Mus musculus tumor suppressor candidate 3, mRNA (cDNA clone IMAGE:3154952), complete cds. [BC003311]
A_52_P358720	0.300343	Olfr266	NM_146489	Mus musculus olfactory receptor 266 (Olfr266), mRNA [NM_146489]
A_51_P487668	0.301222	H2afy3	NR_003523	Mus musculus H2A histone family, member Y3 (H2afy3) on chromosome 15 [NR_003523]
A_52_P288669	0.301513	Rpl35a	NM_021338	Mus musculus ribosomal protein L35a (Rpl35a), mRNA [NM_021338]
A_51_P140237	0.301736	Fhl2	NM_010212	Mus musculus four and a half LIM domains 2 (Fhl2), mRNA [NM_010212]
A_51_P446229	0.302672	Rpl18a	NM_029751	Mus musculus Ribosomal protein L18A (Rpl18a), mRNA [NM_029751]
A_51_P204492	0.303129	D630040G17Rik	NM_178267	Mus musculus RIKEN cDNA D630040G17 gene (D630040G17Rik), mRNA [NM_178267]
A_51_P257457	0.303525	Ltbp2	NM_013589	Mus musculus latent transforming growth factor beta binding protein 2 (Ltbp2), mRNA [NM_013589]
A_51_P191564	0.303767	2410127E18Rik	NM_029742	Mus musculus RIKEN cDNA 2410127E18 gene (2410127E18Rik), mRNA [NM_029742]
A_52_P7937	0.304203	Ppap2a	NM_008903	Mus musculus phosphatidic acid phosphatase 2a (Ppap2a), transcript variant 2, mRNA [NM_008903]
A_52_P201206	0.304335	Scrn1	NM_027268	Mus musculus secernin 1 (Scrn1), mRNA [NM_027268]
A_52_P354509	0.305124	Klhdc8a	NM_144810	Mus musculus kelch domain containing 8A (Klhdc8a), mRNA [NM_144810]
A_52_P132608	0.305947	Slc25a24	NM_172685	Mus musculus solute carrier family 25 (mitochondrial carrier, phosphate carrier), member 24 (Slc25a24), mRNA [NM_172685]
A_51_P197925	0.305959	Zfp57	NM_009559	Mus musculus zinc finger protein 57 (Zfp57), transcript variant 1, mRNA [NM_009559]
A_52_P554670	0.306163	Calu	NM_184053	Mus musculus calumenin (Calu), transcript variant 2, mRNA [NM_184053]
A_51_P408932	0.306233	Ssbp2	NM_024186	Mus musculus single-stranded DNA binding protein 2 (Ssbp2), transcript variant 1, mRNA [NM_024186]
A_52_P193899	0.306474	Rps18	NM_011296	Mus musculus ribosomal protein S18 (Rps18), mRNA [NM_011296]
A_52_P268434	0.306501	Fbxo25	NM_025785	Mus musculus F-box protein 25 (Fbxo25), mRNA [NM_025785]
A_51_P452953	0.306532	Rhod	NM_007485	Mus musculus ras homolog gene family, member D (Rhod), mRNA [NM_007485]
A_51_P416509	0.307596	Hist1h1a	NM_030609	Mus musculus histone cluster 1, H1a (Hist1h1a), mRNA [NM_030609]
A_51_P469433	0.30773	Tnfrsf4	NM_011659	Mus musculus tumor necrosis factor receptor superfamily, member 4 (Tnfrsf4), mRNA [NM_011659]
A_51_P288876	0.308632	Tmem45a	NM_019631	Mus musculus transmembrane protein 45a (Tmem45a), mRNA [NM_019631]
A_51_P291062	0.309126	Col16a1	NM_028266	Mus musculus procollagen, type XVI, alpha 1 (Col16a1), mRNA [NM_028266]
A_52_P496772	0.309651	Vangl2	BC075636	Mus musculus loop tail associated protein, mRNA (cDNA clone IMAGE:30545600), partial cds [BC075636]
A_51_P159835	0.309789	Pcdhb15	NM_053140	Mus musculus protocadherin beta 15 (Pcdhb15), mRNA [NM_053140]
A_51_P206203	0.310387	Mrgprf	NM_145379	Mus musculus MAS-related GPR, member F (Mrgprf), mRNA [NM_145379]
A_52_P464062	0.310939	Hdac8	NM_027382	Mus musculus histone deacetylase 8 (Hdac8), mRNA [NM_027382]
A_51_P227108	0.311018	Bri3bp	NM_029752	Mus musculus Bri3 binding protein (Bri3bp), mRNA [NM_029752]
A_51_P368012	0.311026	Mdfi	NM_010783	Mus musculus MyoD family inhibitor (Mdfi), mRNA [NM_010783]
A_52_P355169	0.312006	Tnc	NM_011607	Mus musculus tenascin C (Tnc), mRNA [NM_011607]
A_51_P215887	0.312612	Aldh18a1	NM_019698	Mus musculus aldehyde dehydrogenase 18 family, member A1 (Aldh18a1), transcript variant 1, mRNA [NM_019698]
A_51_P175303	0.313168	Tle2	NM_019725	Mus musculus transducin-like enhancer of split 2, homolog of Drosophila E(spl) (Tle2), mRNA [NM_019725]
A_52_P16320	0.313549	Tmem106b	NM_027992	Mus musculus transmembrane protein 106B (Tmem106b), mRNA [NM_027992]
A_51_P434527	0.31355	Tnks2	XM_001000101	PREDICTED: Mus musculus tankyrase, TRF1-interacting ankyrin-related ADP-ribose polymerase 2 (Tnks2), mRNA [XM_001000101]
A_52_P520161	0.313579	NAP060490-1
A_52_P163489	0.313601	Tmsb10	NM_025284	Mus musculus thymosin, beta 10 (Tmsb10), mRNA [NM_025284]
A_51_P296796	0.313621	Nt5dc2	NM_027289	Mus musculus 5'-nucleotidase domain containing 2 (Nt5dc2), mRNA [NM_027289]
A_51_P485043	0.313794	Hsp90ab1	NM_008302	Mus musculus heat shock protein 90kDa alpha (cytosolic), class B member 1 (Hsp90ab1), mRNA [NM_008302]
A_52_P423424	0.314716	Ero1l	NM_015774	Mus musculus ERO1-like (S. cerevisiae) (Ero1l), mRNA [NM_015774]
A_52_P33841	0.315057	Xlr	NM_011725	Mus musculus X-linked lymphocyte-regulated complex (Xlr), mRNA [NM_011725]
A_51_P469951	0.315243	Srgap3	AK122276	Mus musculus mRNA for mKIAA0411 protein [AK122276]
A_52_P282000	0.315423	Enah	AK020248	Mus musculus adult male colon cDNA, RIKEN full-length enriched library, clone:9030215D04 product:enabled homolog (Drosophila), full insert sequence. [AK020248]
A_52_P231453	0.31553	Spats2	NM_139140	Mus musculus spermatogenesis associated, serine-rich 2 (Spats2), mRNA [NM_139140]
A_51_P281716	0.317212	Ltbp1	NM_019919	Mus musculus latent transforming growth factor beta binding protein 1 (Ltbp1), transcript variant 1, mRNA [NM_019919]
A_52_P385229	0.317254	Rai14	NM_030690	Mus musculus retinoic acid induced 14 (Rai14), mRNA [NM_030690]
A_51_P305547	0.317503	Snai2	NM_011415	Mus musculus snail homolog 2 (Drosophila) (Snai2), mRNA [NM_011415]
A_51_P450952	0.31756	1110036O03Rik	AK029271	Mus musculus 0 day neonate head cDNA, RIKEN full-length enriched library, clone:4832408F05 product:SYNAPTONEMAL COMPLEX PROTEIN SC65 homolog [Rattus norvegicus], full insert sequence [AK029271]
A_52_P5210	0.31761	Rps20	NM_026147	Mus musculus ribosomal protein S20 (Rps20), mRNA [NM_026147]
A_52_P66107	0.317922	Wsb1	NM_019653	Mus musculus WD repeat and SOCS box-containing 1 (Wsb1), transcript variant 1, mRNA [NM_019653]
A_52_P205037	0.317931	Gnao1	M36778	Mouse GTP-binding protein alpha subunit (G0B-alpha) mRNA, complete cds. [M36778]
A_51_P485161	0.318402	Cplx2	NM_009946	Mus musculus complexin 2 (Cplx2), mRNA [NM_009946]
A_52_P21822	0.31865	Tia1	NM_011585	Mus musculus cytotoxic granule-associated RNA binding protein 1 (Tia1), mRNA [NM_011585]
A_52_P105147	0.318717	Frs2	NM_177798	Mus musculus fibroblast growth factor receptor substrate 2 (Frs2), mRNA [NM_177798]
A_51_P472481	0.319054	Dync2li1	NM_172256	Mus musculus dynein cytoplasmic 2 light intermediate chain 1 (Dync2li1), mRNA [NM_172256]
A_51_P105879	0.319547	Myo5b	NM_201600	Mus musculus myosin Vb (Myo5b), mRNA [NM_201600]
A_52_P589148	0.319753	ENSMUST00000099448		PREDICTED: Mus musculus similar to ribosomal protein S18 (LOC624596), mRNA [XM_988078]
A_51_P487690	0.319915	Ifi44	NM_133871	Mus musculus interferon-induced protein 44 (Ifi44), mRNA [NM_133871]
A_52_P108447	0.32014	Glis2	NM_031184	Mus musculus GLIS family zinc finger 2 (Glis2), mRNA [NM_031184]
A_51_P343497	0.320268	Eprs	NM_029735	Mus musculus glutamyl-prolyl-tRNA synthetase (Eprs), mRNA [NM_029735]
A_51_P214985	0.321153	Zfp521	NM_145492	Mus musculus zinc finger protein 521 (Zfp521), transcript variant 1, mRNA [NM_145492]
A_51_P176769	0.321214	Gpr92	XM_355812	PREDICTED: Mus musculus G protein-coupled receptor 92 (Gpr92), mRNA [XM_355812]
A_52_P515869	0.321898	Rgmb	NM_178615	Mus musculus RGM domain family, member B (Rgmb), mRNA [NM_178615]
A_51_P495232	0.321974	2310016C16Rik	NM_027127	Mus musculus RIKEN cDNA 2310016C16 gene (2310016C16Rik), mRNA [NM_027127]
A_51_P344103	0.322731	Rplp0	U89419	Mus musculus strain BALB/c 60S acidic ribosomal protein P0 mRNA, partial cds. [U89419]
A_52_P515282	0.32329	1110051M20Rik	NM_175123	Mus musculus RIKEN cDNA 1110051M20 gene (1110051M20Rik), transcript variant 2, mRNA [NM_175123]
A_51_P396163	0.323562	Mdm1	NM_010785	Mus musculus transformed mouse 3T3 cell double minute 1 (Mdm1), transcript variant 1, mRNA [NM_010785]
A_51_P504237	0.323766	2010106G01Rik	NM_023220	Mus musculus RIKEN cDNA 2010106G01 gene (2010106G01Rik), mRNA [NM_023220]
A_52_P613255	0.32387	Ncam1	NM_001081445	Mus musculus neural cell adhesion molecule 1 (Ncam1), transcript variant 1, mRNA [NM_001081445]
A_51_P138895	0.323987	Ccdc102a	NM_001033533	Mus musculus coiled-coil domain containing 102A (Ccdc102a), mRNA [NM_001033533]
A_52_P168953	0.325051	Vcan	NM_001081249	Mus musculus versican (Vcan), mRNA [NM_001081249]
A_51_P451516	0.32512	D10Ertd610e	NM_028027	Mus musculus DNA segment, Chr 10, ERATO Doi 610, expressed (D10Ertd610e), mRNA [NM_028027]
A_51_P141772	0.325192	Uhrf2	NM_144873	Mus musculus ubiquitin-like, containing PHD and RING finger domains 2 (Uhrf2), mRNA [NM_144873]
A_52_P534560	0.325378	Frmd6	NM_028127	Mus musculus FERM domain containing 6 (Frmd6), mRNA [NM_028127]
A_51_P357368	0.325883	Usp47	NM_133758	Mus musculus ubiquitin specific peptidase 47 (Usp47), mRNA [NM_133758]
A_51_P472726	0.326078	Pdlim2	NM_145978	Mus musculus PDZ and LIM domain 2 (Pdlim2), mRNA [NM_145978]
A_52_P479522	0.326466	Gulp1	NM_027506	Mus musculus GULP, engulfment adaptor PTB domain containing 1 (Gulp1), transcript variant 1, mRNA [NM_027506]
A_52_P479262	0.326559	Col6a3	NM_009935	Mus musculus procollagen, type VI, alpha 3 (Col6a3), mRNA [NM_009935]
A_52_P496403	0.327009	1700001O22Rik	NM_198000	Mus musculus RIKEN cDNA 1700001O22 gene (1700001O22Rik), mRNA [NM_198000]
A_51_P510914	0.327129	LOC627905	AK013921	Mus musculus 13 days embryo head cDNA, RIKEN full-length enriched library, clone:3100002L24 product:similar to KRUPPEL-RELATED ZINC FINGER PROTEIN F80-L [Mus musculus], full insert sequence. [AK013921]
A_52_P326399	0.32747	Fkbp11	NM_024169	Mus musculus FK506 binding protein 11 (Fkbp11), mRNA [NM_024169]
A_52_P269365	0.327859	Eif4b	NM_145625	Mus musculus eukaryotic translation initiation factor 4B (Eif4b), mRNA [NM_145625]
A_52_P422841	0.327916	5730559C18Rik	NM_028872	Mus musculus RIKEN cDNA 5730559C18 gene (5730559C18Rik), mRNA [NM_028872]
A_51_P462516	0.328243	Senp7	NM_025483	Mus musculus SUMO1/sentrin specific peptidase 7 (Senp7), transcript variant 1, mRNA [NM_025483]
A_51_P475672	0.328601	BC051230	BC051230	Mus musculus, clone IMAGE:3472087, mRNA. [BC051230]
A_51_P317141	0.328986	Col2a1	NM_031163	Mus musculus procollagen, type II, alpha 1 (Col2a1), mRNA [NM_031163]
A_52_P541157	0.329483	Calu	NM_007594	Mus musculus calumenin (Calu), transcript variant 1, mRNA [NM_007594]
A_51_P501803	0.329598	Hoxa2	NM_010451	Mus musculus homeo box A2 (Hoxa2), mRNA [NM_010451]
A_51_P188114	0.329753	Eps8	NM_007945	Mus musculus epidermal growth factor receptor pathway substrate 8 (Eps8), mRNA [NM_007945]
A_52_P209264	0.329945	Wars2	NM_027462	Mus musculus tryptophanyl tRNA synthetase 2 (mitochondrial) (Wars2), mRNA [NM_027462]
A_52_P426692	0.330582	Rybp	NM_019743	Mus musculus RING1 and YY1 binding protein (Rybp), mRNA [NM_019743]
A_52_P14728	0.330949	AK172011	AK172011	Mus musculus activated spleen cDNA, RIKEN full-length enriched library, clone:F830029B05 product:nuclear factor of activated T-cells 5, full insert sequence. [AK172011]
A_51_P424558	0.331031	Zfp93	NM_009567	Mus musculus zinc finger protein 93 (Zfp93), mRNA [NM_009567]
A_51_P457557	0.331297	Col23a1	NM_153393	Mus musculus procollagen, type XXIII, alpha 1 (Col23a1), mRNA [NM_153393]
A_51_P122740	0.331372	Slc37a3	NM_028123	Mus musculus solute carrier family 37 (glycerol-3-phosphate transporter), member 3 (Slc37a3), mRNA [NM_028123]
A_51_P396983	0.33231	D630042P16Rik	NM_175525	Mus musculus RIKEN cDNA D630042P16 gene (D630042P16Rik), mRNA [NM_175525]
A_52_P195260	0.332457	AI480653	NM_198626	Mus musculus expressed sequence AI480653 (AI480653), mRNA [NM_198626]
A_52_P305685	0.332621	NAP111601-1
A_51_P353947	0.332626	Il11ra1	NM_010549	Mus musculus interleukin 11 receptor, alpha chain 1 (Il11ra1), mRNA [NM_010549]
A_52_P732583	0.332951	Npm1	NM_008722	Mus musculus nucleophosmin 1 (Npm1), mRNA [NM_008722]
A_51_P169693	0.333131	Bst2	NM_198095	Mus musculus bone marrow stromal cell antigen 2 (Bst2), mRNA [NM_198095]
A_51_P391764	0.333143	Cbx6	NM_028763	Mus musculus chromobox homolog 6 (Cbx6), mRNA [NM_028763]
A_51_P398683	0.333156	Rcn3	NM_026555	Mus musculus reticulocalbin 3, EF-hand calcium binding domain (Rcn3), mRNA [NM_026555]
A_51_P163714	0.333207	Ephb2	NM_010142	Mus musculus Eph receptor B2 (Ephb2), mRNA [NM_010142]
A_52_P634176	0.333662	Sox5	AK087772	Mus musculus 2 days pregnant adult female ovary cDNA, RIKEN full-length enriched library, clone:E330019E23 product:L-SOX5 PROTEIN [Mus musculus], full insert sequence. [AK087772]
A_51_P275808	0.334086	Trim59	NM_025863	Mus musculus tripartite motif-containing 59 (Trim59), mRNA [NM_025863]
A_51_P139244	0.334624	Rpl39	NM_026055	Mus musculus ribosomal protein L39 (Rpl39), mRNA [NM_026055]
A_51_P234330	0.33516	Rtkn	NM_133641	Mus musculus rhotekin (Rtkn), transcript variant 3, mRNA [NM_133641]
A_51_P244655	0.335194	Rsbn1	NM_172684	Mus musculus rosbin, round spermatid basic protein 1 (Rsbn1), mRNA [NM_172684]
A_51_P169156	0.335456	Rps10	NM_025963	Mus musculus ribosomal protein S10 (Rps10), mRNA [NM_025963]
A_52_P87118	0.336856	NAP029546-1
A_51_P418116	0.337388	Tmem119	NM_146162	Mus musculus transmembrane protein 119 (Tmem119), mRNA [NM_146162]
A_51_P417725	0.337568	Pik3r2	NM_008841	Mus musculus phosphatidylinositol 3-kinase, regulatory subunit, polypeptide 2 (p85 beta) (Pik3r2), mRNA [NM_008841]
A_51_P305437	0.337916	Rcn1	NM_009037	Mus musculus reticulocalbin 1 (Rcn1), mRNA [NM_009037]
A_51_P119544	0.33793	Aga	NM_001005847	Mus musculus aspartylglucosaminidase (Aga), mRNA [NM_001005847]
A_51_P283954	0.33795	Tbc1d17	AK087754	Mus musculus 2 days pregnant adult female ovary cDNA, RIKEN full-length enriched library, clone:E330015O10 product:interleukin-four induced gene 1, full insert sequence [AK087754]
A_52_P150675	0.338051	Rpl37	NM_026069	Mus musculus ribosomal protein L37 (Rpl37), mRNA [NM_026069]
A_52_P61758	0.338254	Kctd5	NM_027008	Mus musculus potassium channel tetramerisation domain containing 5 (Kctd5), mRNA [NM_027008]
A_51_P274789	0.339167	Rai14	NM_030690	Mus musculus retinoic acid induced 14 (Rai14), mRNA [NM_030690]
A_52_P105138	0.339396	Frs2	NM_177798	Mus musculus fibroblast growth factor receptor substrate 2 (Frs2), mRNA [NM_177798]
A_52_P271	0.33943	Dnajc18	NM_029669	Mus musculus DnaJ (Hsp40) homolog, subfamily C, member 18 (Dnajc18), mRNA [NM_029669]
A_51_P396364	0.339478	Cdk5rap2	NM_145990	Mus musculus CDK5 regulatory subunit associated protein 2 (Cdk5rap2), mRNA [NM_145990]
A_51_P156781	0.339514	Zfp260	NM_011981	Mus musculus zinc finger protein 260 (Zfp260), mRNA [NM_011981]
A_51_P293784	0.339829	Fkbp1b	NM_016863	Mus musculus FK506 binding protein 1b (Fkbp1b), mRNA [NM_016863]
A_52_P35048	0.339865	Serpinf1	NM_011340	Mus musculus serine (or cysteine) peptidase inhibitor, clade F, member 1 (Serpinf1), mRNA [NM_011340]
A_51_P389724	0.34006	Rara	NM_009024	Mus musculus retinoic acid receptor, alpha (Rara), mRNA [NM_009024]
A_51_P419726	0.340106	Ptprs	NM_011218	Mus musculus protein tyrosine phosphatase, receptor type, S (Ptprs), mRNA [NM_011218]
A_52_P470956	0.340162	ENSMUST00000091052		ribosomal protein L32, pseudogene [Source:MarkerSymbol;Acc:MGI:98039] [ENSMUST00000091052]
A_52_P52635	0.340727	Nrg1	NM_178591	Mus musculus neuregulin 1 (Nrg1), mRNA [NM_178591]
A_51_P366986	0.341151	Glis2	NM_031184	Mus musculus GLIS family zinc finger 2 (Glis2), mRNA [NM_031184]
A_51_P342556	0.341256	Zfhx4	NM_030708	Mus musculus zinc finger homeodomain 4 (Zfhx4), mRNA [NM_030708]
A_52_P593723	0.341642	P4ha1	NM_011030	Mus musculus procollagen-proline, 2-oxoglutarate 4-dioxygenase (proline 4-hydroxylase), alpha 1 polypeptide (P4ha1), mRNA [NM_011030]
A_51_P255456	0.341662	Cyp1b1	NM_009994	Mus musculus cytochrome P450, family 1, subfamily b, polypeptide 1 (Cyp1b1), mRNA [NM_009994]
A_52_P539434	0.342068	Lbh	NM_029999	Mus musculus limb-bud and heart (Lbh), mRNA [NM_029999]
A_51_P292276	0.342425	Agrn	NM_021604	Mus musculus agrin (Agrn), mRNA [NM_021604]
A_52_P370133	0.342739	Vav3	NM_020505	Mus musculus vav 3 oncogene (Vav3), transcript variant 1, mRNA [NM_020505]
A_51_P318401	0.34311	Stt3a	NM_008408	Mus musculus STT3, subunit of the oligosaccharyltransferase complex, homolog A (S. cerevisiae) (Stt3a), mRNA [NM_008408]
A_51_P108108	0.343394	Lrrc25	NM_153074	Mus musculus leucine rich repeat containing 25 (Lrrc25), mRNA [NM_153074]
A_51_P320281	0.343467	Irx2	NM_010574	Mus musculus Iroquois related homeobox 2 (Drosophila) (Irx2), mRNA [NM_010574]
A_51_P104430	0.343571	Magee1	NM_053201	Mus musculus melanoma antigen, family E, 1 (Magee1), mRNA [NM_053201]
A_51_P333850	0.343835	Senp7	NM_001003972	Mus musculus SUMO1/sentrin specific peptidase 7 (Senp7), transcript variant 3, mRNA [NM_001003972]
A_51_P101858	0.343981	Dlg1	NM_007862	Mus musculus discs, large homolog 1 (Drosophila) (Dlg1), mRNA [NM_007862]
A_51_P200134	0.344453	Snrpg	NM_026506	Mus musculus small nuclear ribonucleoprotein polypeptide G (Snrpg), mRNA [NM_026506]
A_52_P153700	0.344453	Phldb2	NM_153412	Mus musculus pleckstrin homology-like domain, family B, member 2 (Phldb2), mRNA [NM_153412]
A_52_P275152	0.344644	Cdc16	NM_027276	Mus musculus CDC16 cell division cycle 16 homolog (S. cerevisiae) (Cdc16), mRNA [NM_027276]
A_52_P401473	0.344666	Ntn1	NM_008744	Mus musculus netrin 1 (Ntn1), mRNA [NM_008744]
A_51_P505868	0.345062	Lhfp	NM_175386	Mus musculus lipoma HMGIC fusion partner (Lhfp), mRNA [NM_175386]
A_51_P271370	0.345196	Wsb1	NM_019653	Mus musculus WD repeat and SOCS box-containing 1 (Wsb1), transcript variant 1, mRNA [NM_019653]
A_52_P241032	0.345323	ENSMUST00000093546
A_51_P156108	0.345418	Crlf1	NM_018827	Mus musculus cytokine receptor-like factor 1 (Crlf1), mRNA [NM_018827]
A_51_P303180	0.345492	9130005N14Rik	NM_026667	Mus musculus RIKEN cDNA 9130005N14 gene (9130005N14Rik), mRNA [NM_026667]
A_52_P41294	0.345662	2700094F01Rik	NM_178625	Mus musculus RIKEN cDNA 2700094F01 gene (2700094F01Rik), mRNA [NM_178625]
A_52_P463936	0.345866	Isg15	NM_015783	Mus musculus ISG15 ubiquitin-like modifier (Isg15), mRNA [NM_015783]
A_52_P663937	0.34607	NAP030020-1
A_52_P196105	0.346206	Ttyh3	NM_175274	Mus musculus tweety homolog 3 (Drosophila) (Ttyh3), mRNA [NM_175274]
A_51_P299475	0.346261	Olfr63	NM_146937	Mus musculus olfactory receptor 63 (Olfr63), mRNA [NM_146937]
A_51_P303620	0.346335	Whrn	NM_001008791	Mus musculus whirlin (Whrn), transcript variant 2, mRNA [NM_001008791]
A_51_P409429	0.346526	Aars	NM_146217	Mus musculus alanyl-tRNA synthetase (Aars), mRNA [NM_146217]
A_52_P1330	0.346787	Nol9	BC051109	Mus musculus nucleolar protein 9, mRNA (cDNA clone IMAGE:5358744), with apparent retained intron [BC051109]
A_52_P573161	0.347572	Rpl32	NM_172086	Mus musculus ribosomal protein L32 (Rpl32), mRNA [NM_172086]
A_51_P464539	0.347606	Phldb2	NM_153412	Mus musculus pleckstrin homology-like domain, family B, member 2 (Phldb2), mRNA [NM_153412]
A_52_P455251	0.347728	Emx2	NM_010132	Mus musculus empty spiracles homolog 2 (Drosophila) (Emx2), mRNA [NM_010132]
A_52_P608516	0.348119	Sox11	NM_009234	Mus musculus SRY-box containing gene 11 (Sox11), mRNA [NM_009234]
A_52_P683413	0.348165	F3	NM_010171	Mus musculus coagulation factor III (F3), mRNA [NM_010171]
A_51_P263965	0.348608	Hmox1	NM_010442	Mus musculus heme oxygenase (decycling) 1 (Hmox1), mRNA [NM_010442]
A_51_P138972	0.348811	Siva1	NM_013929	Mus musculus SIVA1, apoptosis-inducing factor (Siva1), mRNA [NM_013929]
A_52_P512324	0.34894	Tnpo3	NM_177296	Mus musculus transportin 3 (Tnpo3), mRNA [NM_177296]
A_52_P124173	0.348951	Zdhhc8	NM_172151	Mus musculus zinc finger, DHHC domain containing 8 (Zdhhc8), mRNA [NM_172151]
A_52_P536481	0.349001	Gcs1	NM_020619	Mus musculus glucosidase 1 (Gcs1), mRNA [NM_020619]
A_52_P592007	0.349014	Tfpi	NM_011576	Mus musculus tissue factor pathway inhibitor (Tfpi), mRNA [NM_011576]
A_52_P380502	0.34961	Plec1	NM_201385	Mus musculus plectin 1 (Plec1), transcript variant 2, mRNA [NM_201385]
A_52_P515347	0.349914	Tusc3	NM_030254	Mus musculus tumor suppressor candidate 3 (Tusc3), mRNA [NM_030254]
A_52_P347796	0.350051	LOC628308	XM_902907	PREDICTED: Mus musculus similar to Zinc finger protein 14 (Zinc finger protein KOX6) (Gonadotropin inducible transcription repressor-4) (GIOT-4), transcript variant 4 (LOC628308), mRNA [XM_902907]
A_52_P407086	0.350143	Rpl10a	NM_011287	Mus musculus ribosomal protein L10A (Rpl10a), mRNA [NM_011287]
A_52_P34950	0.350312	Ruvbl1	NM_019685	Mus musculus RuvB-like protein 1 (Ruvbl1), mRNA [NM_019685]
A_51_P304239	0.35084	Loxl1	NM_010729	Mus musculus lysyl oxidase-like 1 (Loxl1), mRNA [NM_010729]
A_51_P405167	0.351175	Maf	NM_001025577	Mus musculus avian musculoaponeurotic fibrosarcoma (v-maf) AS42 oncogene homolog (Maf), mRNA [NM_001025577]
A_52_P205714	0.351212	Lnp	NM_027133	Mus musculus limb and neural patterns (Lnp), mRNA [NM_027133]
A_52_P1021640	0.351274	A_52_P1021640
A_52_P405955	0.351449	Mrps2	NM_080452	Mus musculus mitochondrial ribosomal protein S2 (Mrps2), mRNA [NM_080452]
A_52_P382939	0.351477	D8Ertd457e	NM_181854	Mus musculus DNA segment, Chr 8, ERATO Doi 457, expressed (D8Ertd457e), mRNA [NM_181854]
A_51_P340456	0.351486	Ela3	NM_026419	Mus musculus elastase 3, pancreatic (Ela3), mRNA [NM_026419]
A_51_P258150	0.351846	Adfp	NM_007408	Mus musculus adipose differentiation related protein (Adfp), mRNA [NM_007408]
A_52_P623809	0.352116	TC1630266
A_52_P586574	0.352937	Arbp	NM_007475	Mus musculus acidic ribosomal phosphoprotein P0 (Arbp), mRNA [NM_007475]
A_52_P69998	0.352969	Kdelr2	NM_025841	Mus musculus KDEL (Lys-Asp-Glu-Leu) endoplasmic reticulum protein retention receptor 2 (Kdelr2), mRNA [NM_025841]
A_52_P405177	0.353137	C1qtnf6	NM_028331	Mus musculus C1q and tumor necrosis factor related protein 6 (C1qtnf6), mRNA [NM_028331]
A_52_P639043	0.353177	Glt8d2	NM_029102	Mus musculus glycosyltransferase 8 domain containing 2 (Glt8d2), mRNA [NM_029102]
A_52_P622418	0.353198	Tnnt3	NM_011620	Mus musculus troponin T3, skeletal, fast (Tnnt3), mRNA [NM_011620]
A_51_P456857	0.353636	Ift122	NM_031177	Mus musculus intraflagellar transport 122 homolog (Chlamydomonas) (Ift122), mRNA [NM_031177]
A_51_P205564	0.353723	Eid1	NM_025613	Mus musculus EP300 interacting inhibitor of differentiation 1 (Eid1), mRNA [NM_025613]
A_51_P147213	0.353892	3300002I08Rik	NM_027017	Mus musculus RIKEN cDNA 3300002I08 gene (3300002I08Rik), mRNA [NM_027017]
A_51_P396852	0.353902	Gsto2	NM_026619	Mus musculus glutathione S-transferase omega 2 (Gsto2), mRNA [NM_026619]
A_51_P519024	0.353913	Rpl3	NM_013762	Mus musculus ribosomal protein L3 (Rpl3), mRNA [NM_013762]
A_51_P267024	0.354002	Pafah1b3	NM_008776	Mus musculus platelet-activating factor acetylhydrolase, isoform 1b, alpha1 subunit (Pafah1b3), mRNA [NM_008776]
A_52_P663600	0.354191	Pak1	NM_011035	Mus musculus p21 (CDKN1A)-activated kinase 1 (Pak1), mRNA [NM_011035]
A_52_P629037	0.354503	EG629591	XM_894492	PREDICTED: Mus musculus similar to ribosomal protein S18 (LOC629591), mRNA [XM_894492]
A_51_P331028	0.354828	Rassf8	AK142231	Mus musculus 13 days embryo heart cDNA, RIKEN full-length enriched library, clone:D330016F17 product:unclassifiable, full insert sequence [AK142231]
A_51_P219603	0.355985	Rplp1	NM_018853	Mus musculus ribosomal protein, large, P1 (Rplp1), mRNA [NM_018853]
A_52_P33192	0.356024	Palld	XM_204283	PREDICTED: Mus musculus palladin, cytoskeletal associated protein, transcript variant 1 (Palld), mRNA [XM_204283]
A_52_P827963	0.356061	AK080095	AK080095	Mus musculus adult male aorta and vein cDNA, RIKEN full-length enriched library, clone:A530060I08 product:unclassifiable, full insert sequence. [AK080095]
A_52_P159545	0.35608	ENSMUST00000046903		tripartite motif protein 7 [Source:MarkerSymbol;Acc:MGI:2137353] [ENSMUST00000046903]
A_52_P415299	0.356398	Top2a	NM_011623	Mus musculus topoisomerase (DNA) II alpha (Top2a), mRNA [NM_011623]
A_51_P369200	0.356415	Tpx2	NM_028109	Mus musculus TPX2, microtubule-associated protein homolog (Xenopus laevis) (Tpx2), mRNA [NM_028109]
A_51_P511810	0.356576	Cd63	NM_007653	Mus musculus Cd63 antigen (Cd63), transcript variant 2, mRNA [NM_007653]
A_51_P103465	0.357044	A230106M20Rik	XM_357746	PREDICTED: Mus musculus RIKEN cDNA A230106M20 gene (A230106M20Rik), mRNA [XM_357746]
A_51_P346353	0.357144	Htr4	NM_008313	Mus musculus 5 hydroxytryptamine (serotonin) receptor 4 (Htr4), mRNA [NM_008313]
A_52_P484000	0.357703	NAP027099-1
A_52_P54486	0.357813	Nfat5	AK052632	Mus musculus 0 day neonate kidney cDNA, RIKEN full-length enriched library, clone:D630008O20 product:nuclear factor of activated T-cells 5, full insert sequence. [AK052632]
A_52_P544760	0.358196	Cbx5	NM_007626	Mus musculus chromobox homolog 5 (Drosophila HP1a) (Cbx5), transcript variant 1, mRNA [NM_007626]
A_52_P437363	0.358209	Ppp1r12a	NM_027892	Mus musculus protein phosphatase 1, regulatory (inhibitor) subunit 12A (Ppp1r12a), mRNA [NM_027892]
A_52_P148703	0.358258	NAP017634-001
A_52_P391624	0.358439	2300002D11Rik	NM_001081156	Mus musculus RIKEN cDNA 2300002D11 gene (2300002D11Rik), mRNA [NM_001081156]
A_51_P381086	0.358442	B930041F14Rik	NM_178699	Mus musculus RIKEN cDNA B930041F14 gene (B930041F14Rik), mRNA [NM_178699]
A_52_P472771	0.358957	Kdelc1	NM_023645	Mus musculus KDEL (Lys-Asp-Glu-Leu) containing 1 (Kdelc1), mRNA [NM_023645]
A_51_P299287	0.359198	Impa2	NM_053261	Mus musculus inositol (myo)-1(or 4)-monophosphatase 2 (Impa2), mRNA [NM_053261]
A_52_P426016	0.359372	Impdh2	NM_011830	Mus musculus inosine 5'-phosphate dehydrogenase 2 (Impdh2), mRNA [NM_011830]
A_52_P2670	0.359746	Rmrp	NR_001460	Mus musculus RNA component of mitochondrial RNAase P (Rmrp) on chromosome 4 [NR_001460]
A_52_P618774	0.359788	Hs1bp3	NM_021429	Mus musculus HCLS1 binding protein 3 (Hs1bp3), mRNA [NM_021429]
A_52_P151974	0.360879	Clcn5	AK017285	Mus musculus 6 days neonate head cDNA, RIKEN full-length enriched library, clone:5430408K11 product:unclassifiable, full insert sequence. [AK017285]
A_52_P610900	0.361179	Cask	NM_009806	Mus musculus calcium/calmodulin-dependent serine protein kinase (MAGUK family) (Cask), mRNA [NM_009806]
A_51_P345080	0.361864	Kdelr2	NM_025841	Mus musculus KDEL (Lys-Asp-Glu-Leu) endoplasmic reticulum protein retention receptor 2 (Kdelr2), mRNA [NM_025841]
A_52_P508103	0.362214	ENSMUST00000075235		similar to 40S ribosomal protein S2 (LOC674685), mRNA [Source:RefSeq_dna;Acc:XR_004676] [ENSMUST00000075235]
A_52_P668715	0.362498	Nutf2	NM_026532	Mus musculus nuclear transport factor 2 (Nutf2), mRNA [NM_026532]
A_52_P543391	0.362748	Zfml	NM_008717	Mus musculus zinc finger, matrin-like (Zfml), mRNA [NM_008717]
A_51_P164939	0.362869	Tmem150	NM_144916	Mus musculus transmembrane protein 150 (Tmem150), mRNA [NM_144916]
A_51_P512379	0.362877	NAP109359-1
A_51_P302675	0.362901	Rps26	NM_013765	Mus musculus ribosomal protein S26 (Rps26), mRNA [NM_013765]
A_52_P87713	0.363524	Timp1	NM_011593	Mus musculus tissue inhibitor of metalloproteinase 1 (Timp1), transcript variant 2, mRNA [NM_011593]
A_51_P240136	0.363615	Gng8	NM_010320	Mus musculus guanine nucleotide binding protein (G protein), gamma 8 subunit (Gng8), mRNA [NM_010320]
A_51_P287677	0.363625	Rps18	NM_011296	Mus musculus ribosomal protein S18 (Rps18), mRNA [NM_011296]
A_51_P520456	0.363916	Pdpn	NM_010329	Mus musculus podoplanin (Pdpn), mRNA [NM_010329]
A_51_P250001	0.363953	H1fnt	NM_027304	Mus musculus H1 histone family, member N, testis-specific (H1fnt), mRNA [NM_027304]
A_52_P60374	0.364277	Otub1	NM_134150	Mus musculus OTU domain, ubiquitin aldehyde binding 1 (Otub1), mRNA [NM_134150]
A_52_P532910	0.364292	Tpm1	NM_024427	Mus musculus tropomyosin 1, alpha (Tpm1), mRNA [NM_024427]
A_52_P222096	0.364507	4931428F04Rik	NM_028888	Mus musculus RIKEN cDNA 4931428F04 gene (4931428F04Rik), mRNA [NM_028888]
A_52_P167148	0.364615	Fbxo36	AK036072	Mus musculus 16 days neonate cerebellum cDNA, RIKEN full-length enriched library, clone:9630032H08 product:unclassifiable, full insert sequence [AK036072]
A_52_P350687	0.364767	Vangl1	NM_177545	Mus musculus vang-like 1 (van gogh, Drosophila) (Vangl1), mRNA [NM_177545]
A_52_P434556	0.365024	2310022B05Rik	NM_175149	Mus musculus RIKEN cDNA 2310022B05 gene (2310022B05Rik), mRNA [NM_175149]
A_52_P424840	0.365052	Mrc2	NM_008626	Mus musculus mannose receptor, C type 2 (Mrc2), mRNA [NM_008626]
A_51_P257898	0.366012	Impdh2	NM_011830	Mus musculus inosine 5'-phosphate dehydrogenase 2 (Impdh2), mRNA [NM_011830]
A_52_P678570	0.366124	NAP071111-1
A_51_P511199	0.366256	Rps27	NM_027015	Mus musculus ribosomal protein S27 (Rps27), mRNA [NM_027015]
A_52_P520429	0.366433	LOC329575	NM_001024849	Mus musculus hypothetical LOC329575 (LOC329575), mRNA [NM_001024849]
A_52_P500351	0.366654	Lxn	NM_016753	Mus musculus latexin (Lxn), mRNA [NM_016753]
A_52_P213318	0.366816	Zfr	NM_011767	Mus musculus zinc finger RNA binding protein (Zfr), mRNA [NM_011767]
A_52_P157402	0.366946	Ppm2c	AK133542	Mus musculus adult male xiphoid cartilage cDNA, RIKEN full-length enriched library, clone:5230400L03 product:[Pyruvate dehydrogenase [Lipoamide]]-phosphatase 1, mitochondrial precursor (EC 3.1.3.43) (PDP 1) (Pyruvate dehydrogenase phosphatase,...
A_52_P278238	0.366967	Cep170	AK016937	Mus musculus adult male testis cDNA, RIKEN full-length enriched library, clone:4933426L22 product:KARP-1-BINDING PROTEIN 2 (KAB2) homolog [Homo sapiens], full insert sequence. [AK016937]
A_52_P535012	0.366973	EG626903		PREDICTED: Mus musculus similar to ribosomal protein L31 (LOC626903), mRNA [XM_891513]
A_51_P124505	0.367009	Iars	NM_172015	Mus musculus isoleucine-tRNA synthetase (Iars), mRNA [NM_172015]
A_51_P431433	0.367098	Tmem2	NM_031997	Mus musculus transmembrane protein 2 (Tmem2), transcript variant 1, mRNA [NM_031997]
A_52_P385824	0.367823	Sema5b	BC052397	Mus musculus sema domain, seven thrombospondin repeats (type 1 and type 1-like), transmembrane domain (TM) and short cytoplasmic domain, (semaphorin) 5B, mRNA (cDNA clone MGC:63446 IMAGE:5719939), complete cds. [BC052397]
A_52_P404108	0.367894	Gnb2l1	NM_008143	Mus musculus guanine nucleotide binding protein (G protein), beta polypeptide 2 like 1 (Gnb2l1), mRNA [NM_008143]
A_52_P579252	0.368157	LOC675507	XR_005114	PREDICTED: Mus musculus hypothetical protein LOC675507 (LOC675507), mRNA [XR_005114]
A_51_P254302	0.368327	Rnf157	BC053070	Mus musculus ring finger protein 157, mRNA (cDNA clone IMAGE:6401088) [BC053070]
A_51_P279606	0.368524	Socs1	NM_009896	Mus musculus suppressor of cytokine signaling 1 (Socs1), mRNA [NM_009896]
A_51_P126835	0.36877	2700007P21Rik	NM_173750	Mus musculus RIKEN cDNA 2700007P21 gene (2700007P21Rik), transcript variant 2, mRNA [NM_173750]
A_52_P508355	0.369484	Ilf3	NM_010561	Mus musculus interleukin enhancer binding factor 3 (Ilf3), transcript variant 1, mRNA [NM_010561]
A_52_P594215	0.369534	Ganab	NM_008060	Mus musculus alpha glucosidase 2 alpha neutral subunit (Ganab), mRNA [NM_008060]
A_51_P430002	0.369608	Heatr5a	NM_177171	Mus musculus HEAT repeat containing 5A (Heatr5a), mRNA [NM_177171]
A_51_P250689	0.369845	Pigy	NM_025574	Mus musculus phosphatidylinositol glycan anchor biosynthesis, class Y (Pigy), mRNA [NM_025574]
A_51_P423431	0.370234	Senp8	NM_027838	Mus musculus SUMO/sentrin specific peptidase 8 (Senp8), mRNA [NM_027838]
A_52_P646663	0.370775	ENSMUST00000048238		coiled-coil domain containing 53 [Source:MarkerSymbol;Acc:MGI:1914532] [ENSMUST00000048238]
A_52_P605455	0.371232	Eef2	NM_007907	Mus musculus eukaryotic translation elongation factor 2 (Eef2), mRNA [NM_007907]
A_51_P488991	0.37137	Oaf	NM_178644	Mus musculus OAF homolog (Drosophila) (Oaf), mRNA [NM_178644]
A_51_P496562	0.371619	Slit2	NM_178804	Mus musculus slit homolog 2 (Drosophila) (Slit2), mRNA [NM_178804]
A_51_P458384	0.3717	Slc38a2	NM_175121	Mus musculus solute carrier family 38, member 2 (Slc38a2), mRNA [NM_175121]
A_52_P283378	0.372735	LOC329575	NM_001024849	Mus musculus hypothetical LOC329575 (LOC329575), mRNA [NM_001024849]
A_51_P349546	0.372768	Cd109	NM_153098	Mus musculus CD109 antigen (Cd109), mRNA [NM_153098]
A_52_P93467	0.372924	Sdc4	NM_011521	Mus musculus syndecan 4 (Sdc4), mRNA [NM_011521]
A_51_P512085	0.372976	Colec12	NM_130449	Mus musculus collectin sub-family member 12 (Colec12), mRNA [NM_130449]
A_51_P361638	0.373023	Rps14	NM_020600	Mus musculus ribosomal protein S14 (Rps14), mRNA [NM_020600]
A_51_P238523	0.373068	Tmem58	NM_175259	Mus musculus transmembrane protein 58 (Tmem58), mRNA [NM_175259]
A_51_P457259	0.3731	Sms	NM_009214	Mus musculus spermine synthase (Sms), mRNA [NM_009214]
A_51_P484111	0.373112	Matn2	NM_016762	Mus musculus matrilin 2 (Matn2), mRNA [NM_016762]
A_52_P278837	0.373178	NAP070880-1
A_51_P212390	0.37367	Klk10	NM_133712	Mus musculus kallikrein related-peptidase 10 (Klk10), mRNA [NM_133712]
A_51_P473272	0.373779	Tspan6	NM_019656	Mus musculus tetraspanin 6 (Tspan6), mRNA [NM_019656]
A_52_P462540	0.373808	ENSMUST00000021743		PREDICTED: Mus musculus similar to 40S ribosomal protein S7 (S8) (LOC664813), mRNA [XM_972834]
A_52_P309642	0.374083	NAP028279-1
A_52_P527625	0.374108	Colec12	NM_130449	Mus musculus collectin sub-family member 12 (Colec12), mRNA [NM_130449]
A_51_P321886	0.374128	Cmtm3	NM_024217	Mus musculus CKLF-like MARVEL transmembrane domain containing 3 (Cmtm3), mRNA [NM_024217]
A_51_P117832	0.374251	Eml4	NM_199466	Mus musculus echinoderm microtubule associated protein like 4 (Eml4), mRNA [NM_199466]
A_52_P268007	0.37472	Txndc2	NM_153519	Mus musculus thioredoxin domain containing 2 (spermatozoa) (Txndc2), mRNA [NM_153519]
A_51_P474459	0.374924	Socs3	NM_007707	Mus musculus suppressor of cytokine signaling 3 (Socs3), mRNA [NM_007707]
A_52_P667913	0.375335	Pcdhga7	NM_033590	Mus musculus protocadherin gamma subfamily A, 7 (Pcdhga7), mRNA [NM_033590]
A_52_P575178	0.375519	NAP006594-001
A_51_P151271	0.375587	Eif4b	NM_145625	Mus musculus eukaryotic translation initiation factor 4B (Eif4b), mRNA [NM_145625]
A_51_P132459	0.375988	Rpl27a	NM_011975	Mus musculus ribosomal protein L27a (Rpl27a), mRNA [NM_011975]
A_51_P389597	0.376007	Ins2	NM_008387	Mus musculus insulin II (Ins2), mRNA [NM_008387]
A_52_P578790	0.376543	Dok3	NM_013739	Mus musculus docking protein 3 (Dok3), mRNA [NM_013739]
A_52_P580993	0.376872	Smchd1	NM_028887	Mus musculus SMC hinge domain containing 1 (Smchd1), mRNA [NM_028887]
A_52_P543471	0.376942	ENSMUST00000080362		AGENCOURT_10876042 NIH_MGC_156 Mus musculus cDNA clone IMAGE:6755724 5', mRNA sequence [CA786455]
A_51_P408155	0.376944	Ngfrap1	NM_009750	Mus musculus nerve growth factor receptor (TNFRSF16) associated protein 1 (Ngfrap1), mRNA [NM_009750]
A_51_P284166	0.377026	5730427N09Rik	NM_021552	Mus musculus RIKEN cDNA 5730427N09 gene (5730427N09Rik), mRNA [NM_021552]
A_51_P125467	0.377164	Igf2r	NM_010515	Mus musculus insulin-like growth factor 2 receptor (Igf2r), mRNA [NM_010515]
A_51_P165475	0.377844	C1galt1	NM_052993	Mus musculus core 1 UDP-galactose:N-acetylgalactosamine-alpha-R beta 1,3-galactosyltransferase (C1galt1), mRNA [NM_052993]
A_52_P55392	0.377865	Ccdc66	NM_177111	Mus musculus coiled-coil domain containing 66 (Ccdc66), mRNA [NM_177111]
A_51_P401184	0.378113	Rarres1	XM_130987	PREDICTED: Mus musculus retinoic acid receptor responder (tazarotene induced) 1 (Rarres1), mRNA [XM_130987]
A_51_P267995	0.37826	Rps4x	NM_009094	Mus musculus ribosomal protein S4, X-linked (Rps4x), mRNA [NM_009094]
A_52_P84928	0.378823	Pak3	NM_008778	Mus musculus p21 (CDKN1A)-activated kinase 3 (Pak3), mRNA [NM_008778]
A_52_P54516	0.378926	Bri3bp	NM_029752	Mus musculus Bri3 binding protein (Bri3bp), mRNA [NM_029752]
A_52_P108492	0.378956	LOC627004	XM_891632	PREDICTED: Mus musculus similar to 60S ribosomal protein L23a (LOC627004), mRNA [XM_891632]
A_51_P357573	0.379116	Cald1	NM_145575	Mus musculus caldesmon 1 (Cald1), mRNA [NM_145575]
A_51_P341177	0.379286	Ddah2	NM_016765	Mus musculus dimethylarginine dimethylaminohydrolase 2 (Ddah2), mRNA [NM_016765]
A_52_P362015	0.37931	Copg2	NM_017478	Mus musculus coatomer protein complex, subunit gamma 2 (Copg2), mRNA [NM_017478]
A_51_P156547	0.379665	Tcf3	NM_009332	Mus musculus transcription factor 3 (Tcf3), transcript variant 2, mRNA [NM_009332]
A_51_P108190	0.379821	Rpl23	NM_022891	Mus musculus ribosomal protein L23 (Rpl23), mRNA [NM_022891]
A_51_P372156	0.379856	4930563E22Rik	AK132388	Mus musculus 15 days embryo head cDNA, RIKEN full-length enriched library, clone:4022447N20 product:hypothetical protein, full insert sequence. [AK132388]
A_51_P137947	0.380004	Ttc3	NM_009441	Mus musculus tetratricopeptide repeat domain 3 (Ttc3), mRNA [NM_009441]
A_51_P286215	0.380419	Zfyve20	NM_030081	Mus musculus zinc finger, FYVE domain containing 20 (Zfyve20), mRNA [NM_030081]
A_51_P458067	0.380517	P4ha1	NM_011030	Mus musculus procollagen-proline, 2-oxoglutarate 4-dioxygenase (proline 4-hydroxylase), alpha 1 polypeptide (P4ha1), mRNA [NM_011030]
A_51_P486121	0.380636	ENSMUST00000039827		AF4/FMR2 family, member 3 [Source:MarkerSymbol;Acc:MGI:106927] [ENSMUST00000039827]
A_52_P181733	0.380701	C230093N12Rik	NM_153560	Mus musculus RIKEN cDNA C230093N12 gene (C230093N12Rik), mRNA [NM_153560]
A_51_P329332	0.380919	Slc19a2	NM_054087	Mus musculus solute carrier family 19 (thiamine transporter), member 2 (Slc19a2), mRNA [NM_054087]
A_52_P291924	0.380966	Ncam1	NM_010875	Mus musculus neural cell adhesion molecule 1 (Ncam1), transcript variant 2, mRNA [NM_010875]
A_52_P520439	0.381315	Pebp1	NM_018858	Mus musculus phosphatidylethanolamine binding protein 1 (Pebp1), mRNA [NM_018858]
A_51_P122855	0.381489	Pax5	NM_008782	Mus musculus paired box gene 5 (Pax5), mRNA [NM_008782]
A_52_P272519	0.381935	Copa	NM_009938	Mus musculus coatomer protein complex subunit alpha (Copa), mRNA [NM_009938]
A_51_P452876	0.382545	Ak1	NM_021515	Mus musculus adenylate kinase 1 (Ak1), mRNA [NM_021515]
A_51_P437847	0.38256	Kctd1	NM_134112	Mus musculus potassium channel tetramerisation domain containing 1 (Kctd1), mRNA [NM_134112]
A_52_P678800	0.382662	Rps21	AK010610	Mus musculus ES cells cDNA, RIKEN full-length enriched library, clone:2410030A14 product:40S RIBOSOMAL PROTEIN S21 homolog [Rattus norvegicus], full insert sequence. [AK010610]
A_51_P479528	0.382677	2410127E18Rik	NM_029742	Mus musculus RIKEN cDNA 2410127E18 gene (2410127E18Rik), mRNA [NM_029742]
A_52_P192085	0.382916	Kcng2	XM_140499	PREDICTED: Mus musculus similar to Potassium voltage-gated channel subfamily G member 2 (Voltage-gated potassium channel subunit Kv6.2) (Cardiac potassium channel subunit) (LOC240444), mRNA [XM_140499]
A_52_P740562	0.382931	Rps21	NM_025587	Mus musculus ribosomal protein S21 (Rps21), mRNA [NM_025587]
A_51_P132715	0.383124	Rpl35	NM_025592	Mus musculus ribosomal protein L35 (Rpl35), mRNA [NM_025592]
A_51_P142767	0.383405	Glt8d2	NM_029102	Mus musculus glycosyltransferase 8 domain containing 2 (Glt8d2), mRNA [NM_029102]
A_51_P113722	0.383412	Fbxl14	NM_133940	Mus musculus F-box and leucine-rich repeat protein 14 (Fbxl14), mRNA [NM_133940]
A_52_P443824	0.383414	NAP026680-1
A_52_P335587	0.383549	Prrx1	NM_175686	Mus musculus paired related homeobox 1 (Prrx1), transcript variant 2, mRNA [NM_175686]
A_52_P391718	0.384031	Rpl22	NM_009079	Mus musculus ribosomal protein L22 (Rpl22), mRNA [NM_009079]
A_51_P208263	0.384343	EG333830		PREDICTED: Mus musculus similar to 40S ribosomal protein S7 (S8) (LOC333830), mRNA [XM_982560]
A_52_P396239	0.384601	Fkbp14	NM_153573	Mus musculus FK506 binding protein 14 (Fkbp14), mRNA [NM_153573]
A_51_P351919	0.384604	Zfp454	NM_172794	Mus musculus zinc finger protein 454 (Zfp454), mRNA [NM_172794]
A_51_P439092	0.384671	Rpsa	NM_011029	Mus musculus ribosomal protein SA (Rpsa), mRNA [NM_011029]
A_52_P114414	0.384748	Ksr1	NM_013571	Mus musculus kinase suppressor of ras 1 (Ksr1), mRNA [NM_013571]
A_52_P513153	0.385117	ENSMUST00000079391		caldesmon 1 [Source:MarkerSymbol;Acc:MGI:88250] [ENSMUST00000079391]
A_51_P506093	0.385122	Clip3	NM_001081114	Mus musculus CAP-GLY domain containing linker protein 3 (Clip3), mRNA [NM_001081114]
A_52_P577019	0.385683	Rps15a	NM_170669	Mus musculus ribosomal protein S15a (Rps15a), mRNA [NM_170669]
A_51_P357561	0.38585	Fbxw9	NM_026791	Mus musculus F-box and WD-40 domain protein 9 (Fbxw9), mRNA [NM_026791]
A_51_P266640	0.385858	Nob1	NM_026277	Mus musculus NIN1/RPN12 binding protein 1 homolog (S. cerevisiae) (Nob1), mRNA [NM_026277]
A_52_P247022	0.386174	Arhgap20	NM_175535	Mus musculus Rho GTPase activating protein 20 (Arhgap20), mRNA [NM_175535]
A_51_P123895	0.38697	D0H4S114	NM_053078	Mus musculus DNA segment, human D4S114 (D0H4S114), mRNA [NM_053078]
A_52_P609138	0.387091	Eef1g	NM_026007	Mus musculus eukaryotic translation elongation factor 1 gamma (Eef1g), mRNA [NM_026007]
A_52_P324825	0.387262	Tspan9	NM_175414	Mus musculus tetraspanin 9 (Tspan9), mRNA [NM_175414]
A_52_P9337	0.387541	Hk1	NM_010438	Mus musculus hexokinase 1 (Hk1), mRNA [NM_010438]
A_51_P509669	0.387648	Uap1l1	NM_001033293	Mus musculus UDP-N-acteylglucosamine pyrophosphorylase 1-like 1 (Uap1l1), mRNA [NM_001033293]
A_52_P354732	0.387683	2410127E18Rik	NM_029742	Mus musculus RIKEN cDNA 2410127E18 gene (2410127E18Rik), mRNA [NM_029742]
A_51_P268914	0.387704	Rpl30	NM_009083	Mus musculus ribosomal protein L30 (Rpl30), mRNA [NM_009083]
A_51_P484998	0.388038	Hgf	NM_010427	Mus musculus hepatocyte growth factor (Hgf), mRNA [NM_010427]
A_51_P338040	0.388467	AW146242	NM_146168	Mus musculus expressed sequence AW146242 (AW146242), mRNA [NM_146168]
A_51_P206849	0.388479	2210418O10Rik	BC059210	Mus musculus RIKEN cDNA 2210418O10 gene, mRNA (cDNA clone MGC:66531 IMAGE:6407020), complete cds. [BC059210]
A_51_P467410	0.388643	Npm1	NM_008722	Mus musculus nucleophosmin 1 (Npm1), mRNA [NM_008722]
A_51_P479808	0.388778	Mapk6	NM_015806	Mus musculus mitogen-activated protein kinase 6 (Mapk6), transcript variant 1, mRNA [NM_015806]
A_52_P473632	0.389147	TC1666682		RS7_FELCA (Q5RT64) 40S ribosomal protein S7, partial (73%) [TC1666682]
A_51_P504127	0.389214	Krtap5-4	NM_015809	Mus musculus keratin associated protein 5-4 (Krtap5-4), mRNA [NM_015809]
A_52_P658595	0.389386	ENSMUST00000099433
A_52_P14586	0.39005	LOC640534	XM_993279	PREDICTED: Mus musculus similar to 60S ribosomal protein L17 (L23) (Amino acid starvation-induced protein) (ASI) (LOC640534), mRNA [XM_993279]
A_51_P199618	0.390092	Dzip1l	NM_028258	Mus musculus DAZ interacting protein 1-like (Dzip1l), mRNA [NM_028258]
A_51_P174773	0.390145	2900010M23Rik	NM_026063	Mus musculus RIKEN cDNA 2900010M23 gene (2900010M23Rik), mRNA [NM_026063]
A_51_P281089	0.390296	S100a6	NM_011313	Mus musculus S100 calcium binding protein A6 (calcyclin) (S100a6), mRNA [NM_011313]
A_52_P438036	0.390371	Gpr23	NM_175271	Mus musculus G protein-coupled receptor 23 (Gpr23), mRNA [NM_175271]
A_51_P134602	0.390397	Arbp	NM_007475	Mus musculus acidic ribosomal phosphoprotein P0 (Arbp), mRNA [NM_007475]
A_52_P10781	0.390736	Lman1	AK011495	Mus musculus 10 days embryo whole body cDNA, RIKEN full-length enriched library, clone:2610020P13 product:lectin, mannose-binding, 1, full insert sequence. [AK011495]
A_52_P413623	0.390897	Usp22	NM_001004143	Mus musculus ubiquitin specific peptidase 22 (Usp22), mRNA [NM_001004143]
A_51_P331570	0.390987	Trib3	NM_175093	Mus musculus tribbles homolog 3 (Drosophila) (Trib3), mRNA [NM_175093]
A_51_P438057	0.391023	Rpa3	NM_026632	Mus musculus replication protein A3 (Rpa3), mRNA [NM_026632]
A_52_P351686	0.391214	AK006604	AK006604	Mus musculus adult male testis cDNA, RIKEN full-length enriched library, clone:1700034M11 product:similar to 60S RIBOSOMAL PROTEIN L31 [Mus musculus], full insert sequence. [AK006604]
A_52_P301821	0.391871	D0H4S114	NM_053078	Mus musculus DNA segment, human D4S114 (D0H4S114), mRNA [NM_053078]
A_51_P510916	0.392165	LOC627905	AK013921	Mus musculus 13 days embryo head cDNA, RIKEN full-length enriched library, clone:3100002L24 product:similar to KRUPPEL-RELATED ZINC FINGER PROTEIN F80-L [Mus musculus], full insert sequence. [AK013921]
A_52_P359704	0.392248	Rabl3	NM_001042499	Mus musculus RAB, member of RAS oncogene family-like 3 (Rabl3), mRNA [NM_001042499]
A_52_P635608	0.392344	NAP071064-1
A_52_P479269	0.392543	Sdc1	NM_011519	Mus musculus syndecan 1 (Sdc1), mRNA [NM_011519]
A_51_P135066	0.392734	Tmem106b	NM_027992	Mus musculus transmembrane protein 106B (Tmem106b), mRNA [NM_027992]
A_51_P349192	0.392768	2210013O21Rik	DV046611	DAY20_15_B13.x1 FH DAY20 Mus musculus cDNA clone DAY20_15_B13, mRNA sequence [DV046611]
A_52_P352525	0.392876	Qser1	XM_130565	PREDICTED: Mus musculus glutamine and serine rich 1, transcript variant 1 (Qser1), mRNA [XM_130565]
A_52_P501387	0.392966	NAP027770-1
A_52_P275167	0.393118	Thex1	NM_026067	Mus musculus three prime histone mRNA exonuclease 1 (Thex1), mRNA [NM_026067]
A_52_P325527	0.39321	Edil3	NM_010103	Mus musculus EGF-like repeats and discoidin I-like domains 3 (Edil3), transcript variant 2, mRNA [NM_010103]
A_52_P535561	0.393347	Txndc5	NM_145367	Mus musculus thioredoxin domain containing 5 (Txndc5), mRNA [NM_145367]
A_52_P427759	0.393416	LOC619975	XR_002409	PREDICTED: Mus musculus similar to 60S ribosomal protein L23a (LOC619975), mRNA [XR_002409]
A_51_P324768	0.393523	LOC626832	BC042711	Mus musculus similar to gonadotropin inducible ovarian transcription factor 1, mRNA (cDNA clone IMAGE:4503689), complete cds. [BC042711]
A_52_P276719	0.393561	Agps	NM_172666	Mus musculus alkylglycerone phosphate synthase (Agps), mRNA [NM_172666]
A_51_P487298	0.393997	Vasn	NM_139307	Mus musculus vasorin (Vasn), mRNA [NM_139307]
A_52_P153327	0.394095	Sept2	NM_010891	Mus musculus septin 2 (Sept2), mRNA [NM_010891]
A_51_P268094	0.394424	Serpine2	NM_009255	Mus musculus serine (or cysteine) peptidase inhibitor, clade E, member 2 (Serpine2), mRNA [NM_009255]
A_52_P623690	0.394584	NAP028769-1
A_51_P364421	0.394742	Sybl1	NM_011515	Mus musculus synaptobrevin like 1 (Sybl1), mRNA [NM_011515]
A_52_P45738	0.39504	Trim35	NM_029979	Mus musculus tripartite motif-containing 35 (Trim35), mRNA [NM_029979]
A_52_P673530	0.395065	2700094F01Rik	NM_178625	Mus musculus RIKEN cDNA 2700094F01 gene (2700094F01Rik), mRNA [NM_178625]
A_52_P279712	0.395205	Cbfa2t2	NM_172860	Mus musculus core-binding factor, runt domain, alpha subunit 2, translocated to, 2 (human) (Cbfa2t2), mRNA [NM_172860]
A_52_P378056	0.395309	LOC674833	XM_978851	PREDICTED: Mus musculus similar to 60S ribosomal protein L17 (L23) (Amino acid starvation-induced protein) (ASI) (LOC674833), mRNA [XM_978851]
A_51_P371311	0.395344	Slc1a4	NM_018861	Mus musculus solute carrier family 1 (glutamate/neutral amino acid transporter), member 4 (Slc1a4), mRNA [NM_018861]
A_52_P183826	0.395573	Dctd	NM_178788	Mus musculus dCMP deaminase (Dctd), mRNA [NM_178788]
A_51_P437608	0.395578	Tulp3	NM_011657	Mus musculus tubby-like protein 3 (Tulp3), mRNA [NM_011657]
A_51_P463428	0.395727	Pik3ip1	NM_178149	Mus musculus RIKEN cDNA 1500004A08 gene (1500004A08Rik), mRNA [NM_178149]
A_51_P341349	0.395823	Mtap	NM_024433	Mus musculus methylthioadenosine phosphorylase (Mtap), mRNA [NM_024433]
A_51_P443393	0.396026	Otub1	NM_134150	Mus musculus OTU domain, ubiquitin aldehyde binding 1 (Otub1), mRNA [NM_134150]
A_51_P189105	0.396147	Ppap2a	L43371	Mus musculus (clone HIC-53) hydrogen peroxide-inducible protein mRNA, complete cds [L43371]
A_52_P114260	0.396377	C1r	AF459018	Mus musculus complement component C1RB (C1rb) mRNA, complete cds. [AF459018]
A_52_P618342	0.396535	TC1709414		BC051205 Rps15a protein {Mus musculus} (exp=-1; wgp=0; cg=0), partial (96%) [TC1709414]
A_52_P11441	0.396637	Rab6b	NM_173781	Mus musculus RAB6B, member RAS oncogene family (Rab6b), mRNA [NM_173781]
A_51_P236846	0.396782	F3	NM_010171	Mus musculus coagulation factor III (F3), mRNA [NM_010171]
A_52_P106399	0.396797	BI105085	BI105085	602893338F1 NCI_CGAP_Lu29 Mus musculus cDNA clone IMAGE:5038592 5', mRNA sequence [BI105085]
A_52_P123268	0.396813	Rpl17	NM_001002239	Mus musculus ribosomal protein L17 (Rpl17), mRNA [NM_001002239]
A_52_P304419	0.397151	TC1638968
A_52_P150114	0.397844	ENSMUST00000081163		PREDICTED: Mus musculus similar to 60S ribosomal protein L23a (LOC673224), mRNA [XR_004166]
A_52_P433137	0.397879	D12Ertd551e	NM_028731	Mus musculus DNA segment, Chr 12, ERATO Doi 551, expressed (D12Ertd551e), mRNA [NM_028731]
A_52_P516059	0.398172	Tia1	NM_011585	Mus musculus cytotoxic granule-associated RNA binding protein 1 (Tia1), mRNA [NM_011585]
A_52_P547000	0.398244	LOC382494	XM_892996	PREDICTED: Mus musculus similar to ribosomal protein L15 (LOC382494), mRNA [XM_892996]
A_52_P352967	0.398331	Seh1l	BC027244	Mus musculus SEH1-like (S. cerevisiae, mRNA (cDNA clone MGC:27929 IMAGE:3584697), complete cds. [BC027244]
A_52_P572571	0.398343	Kitl	NM_013598	Mus musculus kit ligand (Kitl), mRNA [NM_013598]
A_51_P334199	0.39848	Ephb3	NM_010143	Mus musculus Eph receptor B3 (Ephb3), mRNA [NM_010143]
A_52_P443904	0.398688	NAP030482-1
A_52_P483746	0.398819	Kdelc2	NM_212445	Mus musculus KDEL (Lys-Asp-Glu-Leu) containing 2 (Kdelc2), mRNA [NM_212445]
A_51_P397768	0.398882	Csnk2a1	NM_007788	Mus musculus casein kinase 2, alpha 1 polypeptide (Csnk2a1), mRNA [NM_007788]
A_51_P463894	0.399127	Unkl	AK054549	Mus musculus 2 days pregnant adult female ovary cDNA, RIKEN full-length enriched library, clone:E330040E10 product:hypothetical Cysteine-rich region profile/Glycine-rich region profile/Arginine-rich region profile containing protein, full insert...
A_51_P301804	0.399183	St3gal1	NM_009177	Mus musculus ST3 beta-galactoside alpha-2,3-sialyltransferase 1 (St3gal1), mRNA [NM_009177]
A_51_P378589	0.399663	Fer1l3	XM_283556	PREDICTED: Mus musculus fer-1-like 3, myoferlin (C. elegans), transcript variant 1 (Fer1l3), mRNA [XM_283556]
A_52_P385584	0.399944	Hoxd9	NM_013555	Mus musculus homeo box D9 (Hoxd9), mRNA [NM_013555]
A_52_P562401	0.400101	Rtn4	NM_194054	Mus musculus reticulon 4 (Rtn4), transcript variant 1, mRNA [NM_194054]
A_51_P187018	0.400412	2010012C16Rik	NM_025564	Mus musculus RIKEN cDNA 2010012C16 gene (2010012C16Rik), mRNA [NM_025564]
A_51_P327632	0.400548	Igsf3	NM_207205	Mus musculus immunoglobulin superfamily, member 3 (Igsf3), mRNA [NM_207205]
A_52_P460285	0.40058	NAP058254-1
A_52_P672212	0.401003	Calr	NM_007591	Mus musculus calreticulin (Calr), mRNA [NM_007591]
A_52_P412046	0.401047	ENSMUST00000096279
A_51_P339103	0.401137	Rpl28	NM_009081	Mus musculus ribosomal protein L28 (Rpl28), mRNA [NM_009081]
A_52_P231893	0.401151	Ift140	NM_134126	Mus musculus intraflagellar transport 140 homolog (Chlamydomonas) (Ift140), mRNA [NM_134126]
A_52_P338492	0.401378	A630007B06Rik	NM_170757	Mus musculus RIKEN cDNA A630007B06 gene (A630007B06Rik), mRNA [NM_170757]
A_52_P449417	0.401463	Vangl1	BC024687	Mus musculus vang-like 1 (van gogh, Drosophila), mRNA (cDNA clone IMAGE:3669388), partial cds [BC024687]
A_52_P220098	0.401578	Eif3s3	NM_080635	Mus musculus eukaryotic translation initiation factor 3, subunit 3 (gamma) (Eif3s3), mRNA [NM_080635]
A_52_P350306	0.40172	LOC668950	XM_001005073	PREDICTED: Mus musculus similar to 60S ribosomal protein L17 (L23) (Amino acid starvation-induced protein) (ASI) (LOC668950), mRNA [XM_001005073]
A_52_P138002	0.401752	Smc3	NM_007790	Mus musculus structural maintenace of chromosomes 3 (Smc3), mRNA [NM_007790]
A_52_P182391	0.401965	C130022M03Rik	AK047371	Mus musculus 10 days neonate cerebellum cDNA, RIKEN full-length enriched library, clone:B930053L08 product:unclassifiable, full insert sequence [AK047371]
A_51_P319810	0.402176	Arhgap20	NM_175535	Mus musculus Rho GTPase activating protein 20 (Arhgap20), mRNA [NM_175535]
A_52_P125494	0.402217	9230110C19Rik	NM_199017	Mus musculus RIKEN cDNA 9230110C19 gene (9230110C19Rik), mRNA [NM_199017]
A_51_P489959	0.402221	Rps21	NM_025587	Mus musculus ribosomal protein S21 (Rps21), mRNA [NM_025587]
A_51_P156348	0.402312	Matr3	NM_010771	Mus musculus matrin 3 (Matr3), mRNA [NM_010771]
A_52_P106805	0.402473	Mtf2	NM_013827	Mus musculus metal response element binding transcription factor 2 (Mtf2), mRNA [NM_013827]
A_52_P244030	0.40249	Zfp516	AK034874	Mus musculus 12 days embryo embryonic body between diaphragm region and neck cDNA, RIKEN full-length enriched library, clone:9430052L09 product:unclassifiable, full insert sequence. [AK034874]
A_51_P211600	0.402695	Sept11	AK028475	Mus musculus 0 day neonate skin cDNA, RIKEN full-length enriched library, clone:4631422A03 product:similar to SEPTIN6 TYPE II [Homo sapiens], full insert sequence. [AK028475]
A_52_P756465	0.402775	BC036642	BC036642	Mus musculus, clone IMAGE:3371217, mRNA. [BC036642]
A_52_P46530	0.403028	Ctdspl2	NM_212450	Mus musculus CTD (carboxy-terminal domain, RNA polymerase II, polypeptide A) small phosphatase like 2 (Ctdspl2), mRNA [NM_212450]
A_51_P459824	0.403412	1700021F07Rik	BC050790	Mus musculus RIKEN cDNA 1700021F07 gene, mRNA (cDNA clone MGC:58673 IMAGE:6741974), complete cds. [BC050790]
A_52_P528634	0.403991	Ttc27	NM_152817	Mus musculus tetratricopeptide repeat domain 27 (Ttc27), mRNA [NM_152817]
A_52_P397012	0.404248	Tars	NM_033074	Mus musculus threonyl-tRNA synthetase (Tars), mRNA [NM_033074]
A_51_P483351	0.404672	Lix1l	AK143438	Mus musculus 10 days neonate olfactory brain cDNA, RIKEN full-length enriched library, clone:E530001C20 product:Weakly similar to LIX1 (Fragment) homolog [Mus musculus], full insert sequence [AK143438]
A_52_P21628	0.404758	Dclk1	NM_019978	Mus musculus doublecortin-like kinase 1 (Dclk1), mRNA [NM_019978]
A_52_P122673	0.404897	Tsga14	NM_031998	Mus musculus testis specific gene A14 (Tsga14), mRNA [NM_031998]
A_52_P457967	0.405009	Trerf1	NM_172622	Mus musculus transcriptional regulating factor 1 (Trerf1), mRNA [NM_172622]
A_52_P515247	0.405136	Arhgdib	NM_007486	Mus musculus Rho, GDP dissociation inhibitor (GDI) beta (Arhgdib), mRNA [NM_007486]
A_51_P252725	0.405215	Gpc4	NM_008150	Mus musculus glypican 4 (Gpc4), mRNA [NM_008150]
A_52_P459276	0.40538	Ift81	NM_009879	Mus musculus intraflagellar transport 81 homolog (Chlamydomonas) (Ift81), mRNA [NM_009879]
A_52_P106081	0.4054	Dpp7	NM_031843	Mus musculus dipeptidylpeptidase 7 (Dpp7), mRNA [NM_031843]
A_52_P218537	0.405752	Hnrpc	NM_016884	Mus musculus heterogeneous nuclear ribonucleoprotein C (Hnrpc), mRNA [NM_016884]
A_52_P30451	0.405965	Ppp1r3c	NM_016854	Mus musculus protein phosphatase 1, regulatory (inhibitor) subunit 3C (Ppp1r3c), mRNA [NM_016854]
A_52_P488596	0.405974	Ap1s2	NM_026887	Mus musculus adaptor-related protein complex 1, sigma 2 subunit (Ap1s2), mRNA [NM_026887]
A_52_P475889	0.406002	Uba52	NM_019883	Mus musculus ubiquitin A-52 residue ribosomal protein fusion product 1 (Uba52), mRNA [NM_019883]
A_52_P373846	0.406143	Pcgf3	NM_172716	Mus musculus polycomb group ring finger 3 (Pcgf3), mRNA [NM_172716]
A_51_P221274	0.406306	Pign	NM_013784	Mus musculus phosphatidylinositol glycan anchor biosynthesis, class N (Pign), mRNA [NM_013784]
A_51_P382618	0.406548	Casp3	U49929	Mus musculus ICE-like cysteine protease (Lice) mRNA, complete cds. [U49929]
A_51_P142107	0.406739	Fzd7	NM_008057	Mus musculus frizzled homolog 7 (Drosophila) (Fzd7), mRNA [NM_008057]
A_51_P318860	0.406955	Zfp9	NM_011763	Mus musculus zinc finger protein 9 (Zfp9), mRNA [NM_011763]
A_52_P605812	0.407174	Ptrh1	NM_178595	Mus musculus peptidyl-tRNA hydrolase 1 homolog (S. cerevisiae) (Ptrh1), mRNA [NM_178595]
A_52_P479961	0.407417	NAP114245-1
A_51_P380309	0.407422	Ncam1	NM_001081445	Mus musculus neural cell adhesion molecule 1 (Ncam1), transcript variant 1, mRNA [NM_001081445]
A_51_P286018	0.407455	Cdc42ep5	NM_021454	Mus musculus CDC42 effector protein (Rho GTPase binding) 5 (Cdc42ep5), mRNA [NM_021454]
A_52_P634111	0.407501	Igf1r	NM_010513	Mus musculus insulin-like growth factor I receptor (Igf1r), mRNA [NM_010513]
A_52_P146457	0.407575	LOC432594	XM_484069	PREDICTED: Mus musculus similar to 60S ribosomal protein L17 (L23) (Amino acid starvation-induced protein) (ASI) (LOC432594), mRNA [XM_484069]
A_52_P563285	0.408082	Col11a2	NM_009926	Mus musculus procollagen, type XI, alpha 2 (Col11a2), mRNA [NM_009926]
A_52_P375016	0.40813	Zfp445	NM_173364	Mus musculus zinc finger protein 445 (Zfp445), mRNA [NM_173364]
A_52_P626770	0.408303	Ilf3	NM_010561	Mus musculus interleukin enhancer binding factor 3 (Ilf3), transcript variant 1, mRNA [NM_010561]
A_52_P667287	0.40836	Lass6	NM_172856	Mus musculus longevity assurance homolog 6 (S. cerevisiae) (Lass6), mRNA [NM_172856]
A_52_P33593	0.408467	Gtpbp3	NM_032544	Mus musculus GTP binding protein 3 (Gtpbp3), mRNA [NM_032544]
A_52_P994399	0.408531	Defcr5	NM_007851	Mus musculus defensin related cryptdin 5 (Defcr5), mRNA [NM_007851]
A_51_P117739	0.408566	Figf	NM_010216	Mus musculus c-fos induced growth factor (Figf), mRNA [NM_010216]
A_52_P284672	0.408603	Rps8	NM_009098	Mus musculus ribosomal protein S8 (Rps8), mRNA [NM_009098]
A_52_P666824	0.408616	2610024E20Rik	NM_146084	Mus musculus RIKEN cDNA 2610024E20 gene (2610024E20Rik), mRNA [NM_146084]
A_51_P496604	0.408734	Ubfd1	NM_138589	Mus musculus ubiquitin family domain containing 1 (Ubfd1), mRNA [NM_138589]
A_52_P626772	0.408996	Ilf3	NM_010561	Mus musculus interleukin enhancer binding factor 3 (Ilf3), transcript variant 1, mRNA [NM_010561]
A_52_P311068	0.40913	Plxnb2	BC031202	Mus musculus plexin B2, mRNA (cDNA clone IMAGE:5066347), complete cds. [BC031202]
A_52_P395528	0.409272	NAP028816-1
A_52_P259658	0.409408	Mia3	NM_177389	Mus musculus melanoma inhibitory activity 3 (Mia3), mRNA [NM_177389]
A_52_P163796	0.409476	Tubb5	NM_011655	Mus musculus tubulin, beta 5 (Tubb5), mRNA [NM_011655]
A_52_P516733	0.409577	D15Ertd621e	NM_145959	Mus musculus DNA segment, Chr 15, ERATO Doi 621, expressed (D15Ertd621e), mRNA [NM_145959]
A_51_P127545	0.409664	Rps7	NM_011300	Mus musculus ribosomal protein S7 (Rps7), mRNA [NM_011300]
A_51_P114028	0.410205	Bcl7c	NM_009746	Mus musculus B-cell CLL/lymphoma 7C (Bcl7c), mRNA [NM_009746]
A_52_P936271	0.410214	J00623	J00623	MUSRGEB3 Mus musculus 18S ribosomal RNA gene, partial sequence; internal transcribed spacer 1, 5.8S ribosomal RNA gene and internal transcribed spacer 1, complete sequence; and 28S ribosomal RNA gene, partial sequence [J00623]
A_52_P375351	0.410427	NAP100007-001
A_51_P479590	0.410803	Wwc1	BC037006	Mus musculus WW, C2 and coiled-coil domain containing 1, mRNA (cDNA clone MGC:47054 IMAGE:5116674), complete cds. [BC037006]
A_51_P467853	0.410987	Exoc6b	BC059244	Mus musculus exocyst complex component 6B, mRNA (cDNA clone IMAGE:6417601), partial cds. [BC059244]
A_52_P392071	0.411083	A930041I02Rik	NM_178778	Mus musculus RIKEN cDNA A930041I02 gene (A930041I02Rik), mRNA [NM_178778]
A_51_P262757	0.411098	2310076L09Rik	NM_025874	Mus musculus RIKEN cDNA 2310076L09 gene (2310076L09Rik), transcript variant 1, mRNA [NM_025874]
A_52_P109109	0.411195	Rpl17	NM_001002239	Mus musculus ribosomal protein L17 (Rpl17), mRNA [NM_001002239]
A_52_P82804	0.411313	Gnl3l	NM_198110	Mus musculus guanine nucleotide binding protein-like 3 (nucleolar)-like (Gnl3l), mRNA [NM_198110]
A_51_P171697	0.411342	Pebp1	NM_018858	Mus musculus phosphatidylethanolamine binding protein 1 (Pebp1), mRNA [NM_018858]
A_52_P148798	0.411558	NAP028768-1
A_51_P363801	0.411961	Pgpep1	NM_023217	Mus musculus pyroglutamyl-peptidase I (Pgpep1), mRNA [NM_023217]
A_51_P381801	0.412107	Arf5	NM_007480	Mus musculus ADP-ribosylation factor 5 (Arf5), mRNA [NM_007480]
A_52_P384394	0.412269	Bmf	NM_138313	Mus musculus Bcl2 modifying factor (Bmf), mRNA [NM_138313]
A_52_P153721	0.412333	Dlg4	BC014807	Mus musculus discs, large homolog 4 (Drosophila), mRNA (cDNA clone MGC:25332 IMAGE:4501403), complete cds. [BC014807]
A_51_P126258	0.412396	Pcdhga1	NM_033584	Mus musculus protocadherin gamma subfamily A, 1 (Pcdhga1), mRNA [NM_033584]
A_52_P259258	0.412413	Phf20	NM_172674	Mus musculus PHD finger protein 20 (Phf20), mRNA [NM_172674]
A_51_P415688	0.412815	Gng12	NM_025278	Mus musculus guanine nucleotide binding protein (G protein), gamma 12 (Gng12), mRNA [NM_025278]
A_52_P49886	0.413097	Rps3a	NM_016959	Mus musculus ribosomal protein S3a (Rps3a), mRNA [NM_016959]
A_51_P421279	0.413186	Eml1	NM_001043335	Mus musculus echinoderm microtubule associated protein like 1 (Eml1), transcript variant 1, mRNA [NM_001043335]
A_52_P405893	0.41324	Rpl24	NM_024218	Mus musculus ribosomal protein L24 (Rpl24), mRNA [NM_024218]
A_51_P183732	0.41327	Rpl5	NM_016980	Mus musculus ribosomal protein L5 (Rpl5), mRNA [NM_016980]
A_51_P183373	0.413474	5830417C01Rik	NM_024282	Mus musculus RIKEN cDNA 5830417C01 gene (5830417C01Rik), mRNA [NM_024282]
A_51_P376165	0.413919	Rps23	NM_024175	Mus musculus ribosomal protein S23 (Rps23), mRNA [NM_024175]
A_52_P628580	0.414096	Ggtl3	NM_144786	Mus musculus gamma-glutamyltransferase-like 3 (Ggtl3), mRNA [NM_144786]
A_51_P510882	0.414231	Adam12	NM_007400	Mus musculus a disintegrin and metallopeptidase domain 12 (meltrin alpha) (Adam12), mRNA [NM_007400]
A_51_P496685	0.414271	B4galt2	NM_017377	Mus musculus UDP-Gal:betaGlcNAc beta 1,4- galactosyltransferase, polypeptide 2 (B4galt2), mRNA [NM_017377]
A_51_P464530	0.414963	Sept5	NM_213614	Mus musculus septin 5 (Sept5), mRNA [NM_213614]
A_51_P121288	0.414989	Mkks	NM_021527	Mus musculus McKusick-Kaufman syndrome protein (Mkks), mRNA [NM_021527]
A_52_P131367	0.415024	Zc3hav1	NM_028864	Mus musculus zinc finger CCCH type, antiviral 1 (Zc3hav1), mRNA [NM_028864]
A_51_P112223	0.415124	Gsta4	NM_010357	Mus musculus glutathione S-transferase, alpha 4 (Gsta4), mRNA [NM_010357]
A_52_P44949	0.415596	Tpm1	NM_024427	Mus musculus tropomyosin 1, alpha (Tpm1), mRNA [NM_024427]
A_51_P435198	0.415903	Cryz	NM_009968	Mus musculus crystallin, zeta (Cryz), mRNA [NM_009968]
A_51_P322954	0.416309	AY078069	NM_172142	Mus musculus cDNA sequence AY078069 (AY078069), mRNA [NM_172142]
A_52_P189550	0.416694	Rps8	NM_009098	Mus musculus ribosomal protein S8 (Rps8), mRNA [NM_009098]
A_51_P393748	0.41685	Ddx58	NM_172689	Mus musculus DEAD (Asp-Glu-Ala-Asp) box polypeptide 58 (Ddx58), mRNA [NM_172689]
A_52_P217492	0.416947	5031425E22Rik	AK017143	Mus musculus 11 days pregnant adult female ovary and uterus cDNA, RIKEN full-length enriched library, clone:5031425E22 product:unclassifiable, full insert sequence [AK017143]
A_52_P625431	0.417308	Hnrpa0	AK019388	Mus musculus 12 days embryo head cDNA, RIKEN full-length enriched library, clone:3010025E17 product:Heterogeneous nuclear ribonucleoprotein A0 (hnRNP A0) homolog [Homo sapiens], full insert sequence. [AK019388]
A_52_P163795	0.417464	Tubb5	NM_011655	Mus musculus tubulin, beta 5 (Tubb5), mRNA [NM_011655]
A_51_P248857	0.417502	6230427J02Rik	NM_026597	Mus musculus RIKEN cDNA 6230427J02 gene (6230427J02Rik), mRNA [NM_026597]
A_51_P433679	0.417913	1600014C10Rik	BC092099	Mus musculus RIKEN cDNA 1600014C10 gene, mRNA (cDNA clone MGC:102348 IMAGE:5136977), complete cds. [BC092099]
A_51_P142206	0.418189	1600029O15Rik	AK005564	Mus musculus adult female placenta cDNA, RIKEN full-length enriched library, clone:1600029O15 product:similar to Rpl17 protein (Fragment) [Mus musculus], full insert sequence. [AK005564]
A_52_P358388	0.418282	Ppp4r2	NM_182939	Mus musculus protein phosphatase 4, regulatory subunit 2 (Ppp4r2), mRNA [NM_182939]
A_51_P176156	0.41862	Sirpb1	NM_178792	Mus musculus signal-regulatory protein beta 1 (Sirpb1), transcript variant 1, mRNA [NM_178792]
A_51_P468173	0.418874	Hmgn1	NM_008251	Mus musculus high mobility group nucleosomal binding domain 1 (Hmgn1), mRNA [NM_008251]
A_52_P238044	0.41928	Psmc3ip	NM_008949	Mus musculus proteasome (prosome, macropain) 26S subunit, ATPase 3, interacting protein (Psmc3ip), mRNA [NM_008949]
A_52_P418014	0.419413	Akt1	NM_009652	Mus musculus thymoma viral proto-oncogene 1 (Akt1), mRNA [NM_009652]
A_51_P492482	0.419586	Cstf2t	NM_031249	Mus musculus cleavage stimulation factor, 3' pre-RNA subunit 2, tau (Cstf2t), mRNA [NM_031249]
A_52_P685714	0.419907	Rpl23a	NM_207523	Mus musculus ribosomal protein L23a (Rpl23a), mRNA [NM_207523]
A_52_P650279	0.420227	Sec61a1	NM_016906	Mus musculus Sec61 alpha 1 subunit (S. cerevisiae) (Sec61a1), mRNA [NM_016906]
A_51_P128987	0.420411	Akr1b8	NM_008012	Mus musculus aldo-keto reductase family 1, member B8 (Akr1b8), mRNA [NM_008012]
A_51_P302738	0.420551	Upp1	NM_009477	Mus musculus uridine phosphorylase 1 (Upp1), mRNA [NM_009477]
A_51_P174335	0.420883	Rps5	NM_009095	Mus musculus ribosomal protein S5 (Rps5), mRNA [NM_009095]
A_52_P47786	0.420901	AB069910	AB069910	Mus musculus V303-D-J-C mu mRNA, partial cds, sequence:R2-10. [AB069910]
A_51_P235311	0.421408	Rpl13a	NM_009438	Mus musculus ribosomal protein L13a (Rpl13a), mRNA [NM_009438]
A_51_P127215	0.421473	Sesn3	AK033655	Mus musculus adult male cecum cDNA, RIKEN full-length enriched library, clone:9130209A03 product:unclassifiable, full insert sequence [AK033655]
A_51_P165834	0.421598	Dclk2	NM_027539	Mus musculus doublecortin-like kinase 2 (Dclk2), mRNA [NM_027539]
A_51_P122290	0.421726	Prkcbp1	NM_027230	Mus musculus protein kinase C binding protein 1 (Prkcbp1), mRNA [NM_027230]
A_51_P268154	0.422151	Acsl4	NM_019477	Mus musculus acyl-CoA synthetase long-chain family member 4 (Acsl4), transcript variant 2, mRNA [NM_019477]
A_52_P212336	0.422306	6820431F20Rik	BC086761	Mus musculus cDNA clone IMAGE:6409743, containing frame-shift errors [BC086761]
A_52_P237472	0.422446	NAP044074-1
A_52_P503387	0.422661	Trp53inp1	NM_021897	Mus musculus transformation related protein 53 inducible nuclear protein 1 (Trp53inp1), mRNA [NM_021897]
A_51_P470724	0.422883	Eif2s2	NM_026030	Mus musculus eukaryotic translation initiation factor 2, subunit 2 (beta) (Eif2s2), mRNA [NM_026030]
A_52_P431116	0.423069	Col23a1	NM_153393	Mus musculus procollagen, type XXIII, alpha 1 (Col23a1), mRNA [NM_153393]
A_52_P129388	0.423546	Col27a1	NM_025685	Mus musculus procollagen, type XXVII, alpha 1 (Col27a1), mRNA [NM_025685]
A_52_P491849	0.424584	Trp53	NM_011640	Mus musculus transformation related protein 53 (Trp53), mRNA [NM_011640]
A_52_P149766	0.424717	Myo1e	NM_181072	Mus musculus myosin IE (Myo1e), mRNA [NM_181072]
A_52_P229959	0.424793	Sept6	NM_019942	Mus musculus septin 6 (Sept6), mRNA [NM_019942]
A_51_P304876	0.425126	D1Pas1	NM_033077	Mus musculus DNA segment, Chr 1, Pasteur Institute 1 (D1Pas1), mRNA [NM_033077]
A_52_P380805	0.42538	Pdpn	NM_010329	Mus musculus podoplanin (Pdpn), mRNA [NM_010329]
A_51_P234539	0.425674	Nfxl1	NM_133921	Mus musculus nuclear transcription factor, X-box binding-like 1 (Nfxl1), mRNA [NM_133921]
A_51_P334570	0.425771	Uba52	AF118402	Mus musculus ubiquitin/60S ribosomal fusion protein mRNA, complete cds. [AF118402]
A_52_P299311	0.426118	LOC624863	XR_002787	PREDICTED: Mus musculus similar to ribosomal protein L13a (LOC624863), mRNA [XR_002787]
A_51_P509107	0.426435	Rpl35a	NM_021338	Mus musculus ribosomal protein L35a (Rpl35a), mRNA [NM_021338]
A_52_P322976	0.426451	NAP020861-001
A_51_P417876	0.426627	Smyd5	NM_144918	Mus musculus SET and MYND domain containing 5 (Smyd5), mRNA [NM_144918]
A_51_P134776	0.426795	Dusp12	NM_023173	Mus musculus dual specificity phosphatase 12 (Dusp12), mRNA [NM_023173]
A_52_P325598	0.426842	AK076557	AK076557	Mus musculus adult male testis cDNA, RIKEN full-length enriched library, clone:4921508F21 product:unclassifiable, full insert sequence. [AK076557]
A_52_P345616	0.426999	2700078E11Rik	NM_030197	Mus musculus RIKEN cDNA 2700078E11 gene (2700078E11Rik), mRNA [NM_030197]
A_52_P604419	0.427195	Stt3a	NM_008408	Mus musculus STT3, subunit of the oligosaccharyltransferase complex, homolog A (S. cerevisiae) (Stt3a), mRNA [NM_008408]
A_51_P425047	0.427262	Srpx2	NM_026838	Mus musculus sushi-repeat-containing protein, X-linked 2 (Srpx2), transcript variant 1, mRNA [NM_026838]
A_52_P566055	0.427301	Nup43	NM_145706	Mus musculus nucleoporin 43 (Nup43), mRNA [NM_145706]
A_52_P181235	0.427611	2010315L10Rik	NM_025917	Mus musculus RIKEN cDNA 2010315L10 gene (2010315L10Rik), transcript variant 1, mRNA [NM_025917]
A_52_P651894	0.427764	Rpl23	NM_022891	Mus musculus ribosomal protein L23 (Rpl23), mRNA [NM_022891]
A_52_P533146	0.427946	Ddit3	NM_007837	Mus musculus DNA-damage inducible transcript 3 (Ddit3), mRNA [NM_007837]
A_51_P300717	0.428076	Stxbp1	NM_009295	Mus musculus syntaxin binding protein 1 (Stxbp1), mRNA [NM_009295]
A_52_P490910	0.42832	Fndc4	NM_022424	Mus musculus fibronectin type III domain containing 4 (Fndc4), mRNA [NM_022424]
A_51_P458575	0.428649	Rpl24	NM_024218	Mus musculus ribosomal protein L24 (Rpl24), mRNA [NM_024218]
A_52_P768	0.4288	Rps3	NM_012052	Mus musculus ribosomal protein S3 (Rps3), mRNA [NM_012052]
A_51_P243283	0.428829	Rpl34	NM_001005859	Mus musculus ribosomal protein L34 (Rpl34), transcript variant 2, mRNA [NM_001005859]
A_51_P506015	0.429243	Prkcbp1	NM_027230	Mus musculus protein kinase C binding protein 1 (Prkcbp1), mRNA [NM_027230]
A_51_P422996	0.429721	Spred1	NM_033524	Mus musculus sprouty protein with EVH-1 domain 1, related sequence (Spred1), mRNA [NM_033524]
A_52_P223814	0.429867	NAP026710-1
A_52_P645159	0.429957	Cpsf6	NM_001013391	Mus musculus cleavage and polyadenylation specific factor 6 (Cpsf6), mRNA [NM_001013391]
A_52_P504786	0.430369	Mgea5	NM_023799	Mus musculus meningioma expressed antigen 5 (hyaluronidase) (Mgea5), mRNA [NM_023799]
A_51_P488673	0.430722	Gnb2l1	NM_008143	Mus musculus guanine nucleotide binding protein (G protein), beta polypeptide 2 like 1 (Gnb2l1), mRNA [NM_008143]
A_52_P234910	0.430936	NAP061240-1
A_52_P450470	0.431311	NAP060054-1
A_52_P346326	0.431599	Rpl7	NM_011291	Mus musculus ribosomal protein L7 (Rpl7), mRNA [NM_011291]
A_52_P195414	0.431654	Prmt3	NM_133740	Mus musculus protein arginine N-methyltransferase 3 (Prmt3), mRNA [NM_133740]
A_51_P128696	0.431661	Slc16a8	NM_020516	Mus musculus solute carrier family 16 (monocarboxylic acid transporters), member 8 (Slc16a8), mRNA [NM_020516]
A_52_P178298	0.431884	NAP029896-1
A_51_P277373	0.4319	Slc8a1	AF004666	Mus musculus sodium-calcium exchanger (NCX1) mRNA, complete cds. [AF004666]
A_52_P546610	0.431966	Pam	NM_013626	Mus musculus peptidylglycine alpha-amidating monooxygenase (Pam), mRNA [NM_013626]
A_52_P367621	0.43205	Arid5b	NM_023598	Mus musculus AT rich interactive domain 5B (Mrf1 like) (Arid5b), mRNA [NM_023598]
A_51_P138830	0.432175	BC023055	NM_198108	Mus musculus cDNA sequence BC023055 (BC023055), mRNA [NM_198108]
A_52_P591542	0.432535	Atp8b2	NM_001081182	Mus musculus Atpase, class I, type 8B, member 2 (Atp8b2), mRNA [NM_001081182]
A_51_P454280	0.43307	Chd4	NM_145979	Mus musculus chromodomain helicase DNA binding protein 4 (Chd4), mRNA [NM_145979]
A_51_P428754	0.433204	Grik5	NM_008168	Mus musculus glutamate receptor, ionotropic, kainate 5 (gamma 2) (Grik5), mRNA [NM_008168]
A_51_P221428	0.433431	Cbx6	NM_028763	Mus musculus chromobox homolog 6 (Cbx6), mRNA [NM_028763]
A_51_P394471	0.433693	Tcfe2a	NM_011548	Mus musculus transcription factor E2a (Tcfe2a), mRNA [NM_011548]
A_51_P216652	0.433802	Osr1	NM_011859	Mus musculus odd-skipped related 1 (Drosophila) (Osr1), mRNA [NM_011859]
A_52_P307628	0.433919	Foxp4	NM_028767	Mus musculus forkhead box P4 (Foxp4), mRNA [NM_028767]
A_52_P230705	0.433982	Copb1	NM_033370	Mus musculus coatomer protein complex, subunit beta 1 (Copb1), mRNA [NM_033370]
A_52_P8922	0.434304	Sntb2	NM_009229	Mus musculus syntrophin, basic 2 (Sntb2), mRNA [NM_009229]
A_51_P350403	0.434562	Exoc4	NM_009148	Mus musculus exocyst complex component 4 (Exoc4), mRNA [NM_009148]
A_52_P84803	0.43485	LOC279067		PREDICTED: Mus musculus similar to 60S acidic ribosomal protein P1, transcript variant 1 (LOC279067), mRNA [XM_205095]
A_51_P499623	0.434865	Mlana	AK020928	Mus musculus adult retina cDNA, RIKEN full-length enriched library, clone:A930034P04 product:weakly similar to MELANOMA ANTIGEN RECOGNIZED BY T-CELLS 1 (MART-1) (MELAN-A PROTEIN) (ANTIGEN SK29-AA) (ANTIGEN LB39-AA) [Homo sapiens], full insert...
A_52_P536293	0.434894	LOC672341	XR_003818	PREDICTED: Mus musculus similar to 60S ribosomal protein L21 (LOC672341), mRNA [XR_003818]
A_52_P480141	0.435089	Plxna1	AK220460	Mus musculus mRNA for mKIAA4053 protein [AK220460]
A_52_P521882	0.435484	Hddc3	NM_026812	Mus musculus HD domain containing 3 (Hddc3), mRNA [NM_026812]
A_52_P732508	0.435643	A_52_P732508
A_51_P167232	0.435758	Cask	NM_009806	Mus musculus calcium/calmodulin-dependent serine protein kinase (MAGUK family) (Cask), mRNA [NM_009806]
A_52_P529013	0.436239	Paip2b	NM_146169	Mus musculus poly(A) binding protein interacting protein 2B (Paip2b), mRNA [NM_146169]
A_52_P297642	0.436352	Pdia5	NM_028295	Mus musculus protein disulfide isomerase associated 5 (Pdia5), mRNA [NM_028295]
A_52_P17306	0.436487	NAP028543-1
A_52_P133965	0.436877	Jmjd1a	NM_001038695	Mus musculus jumonji domain containing 1A (Jmjd1a), transcript variant 2, mRNA [NM_001038695]
A_51_P327825	0.437185	Ppib	NM_011149	Mus musculus peptidylprolyl isomerase B (Ppib), mRNA [NM_011149]
A_51_P233478	0.43768	Usf1	NM_009480	Mus musculus upstream transcription factor 1 (Usf1), mRNA [NM_009480]
A_52_P584874	0.437832	Jarid1b	NM_152895	Mus musculus jumonji, AT rich interactive domain 1B (Rbp2 like) (Jarid1b), mRNA [NM_152895]
A_52_P371918	0.437967	Sfrs2ip	NM_028148	Mus musculus splicing factor, arginine/serine-rich 2, interacting protein (Sfrs2ip), mRNA [NM_028148]
A_51_P178761	0.437973	Fau	NM_007990	Mus musculus Finkel-Biskis-Reilly murine sarcoma virus (FBR-MuSV) ubiquitously expressed (fox derived) (Fau), mRNA [NM_007990]
A_51_P209597	0.438041	Afm	AK143987	Mus musculus adult male kidney cDNA, RIKEN full-length enriched library, clone:F530013J02 product:afamin, full insert sequence. [AK143987]
A_52_P684748	0.438072	Chic1	AK034427	Mus musculus adult male diencephalon cDNA, RIKEN full-length enriched library, clone:9330189P03 product:cysteine-rich hydrophobic domain 1, full insert sequence [AK034427]
A_52_P257204	0.438078	Hsp90ab1	NM_008302	Mus musculus heat shock protein 90kDa alpha (cytosolic), class B member 1 (Hsp90ab1), mRNA [NM_008302]
A_52_P157170	0.438336	Rnf157	BC053070	Mus musculus ring finger protein 157, mRNA (cDNA clone IMAGE:6401088) [BC053070]
A_52_P104444	0.438628	NAP062835-1
A_52_P315369	0.438706	Cyb5r1	NM_028057	Mus musculus cytochrome b5 reductase 1 (Cyb5r1), mRNA [NM_028057]
A_52_P538240	0.438756	TC1617856		Q58EU6_MOUSE (Q58EU6) Ribosomal protein L5 (17 days embryo kidney cDNA, RIKEN full-length enriched library, clone:I920182J09 product:ribosomal protein L5, full insert sequence), complete [TC1617856]
A_51_P152826	0.438782	Golt1b	NM_025872	Mus musculus golgi transport 1 homolog B (S. cerevisiae) (Golt1b), mRNA [NM_025872]
A_52_P457971	0.43879	Trerf1	NM_172622	Mus musculus transcriptional regulating factor 1 (Trerf1), mRNA [NM_172622]
A_52_P627863	0.438886	Ssbp3	NM_023672	Mus musculus single-stranded DNA binding protein 3 (Ssbp3), transcript variant 1, mRNA [NM_023672]
A_52_P570006	0.439031	2700007P21Rik	NM_001025102	Mus musculus RIKEN cDNA 2700007P21 gene (2700007P21Rik), transcript variant 1, mRNA [NM_001025102]
A_51_P495171	0.439143	2610029G23Rik	NM_026312	Mus musculus RIKEN cDNA 2610029G23 gene (2610029G23Rik), mRNA [NM_026312]
A_51_P481052	0.43946	Isg20l1	NM_026531	Mus musculus interferon stimulated exonuclease gene 20-like 1 (Isg20l1), mRNA [NM_026531]
A_52_P34893	0.439526	Rsrc1	NM_025822	Mus musculus arginine/serine-rich coiled-coil 1 (Rsrc1), mRNA [NM_025822]
A_51_P357422	0.439548	2410022L05Rik	NM_025556	Mus musculus RIKEN cDNA 2410022L05 gene (2410022L05Rik), mRNA [NM_025556]
A_51_P254906	0.439565	4933426M11Rik	NM_178682	Mus musculus RIKEN cDNA 4933426M11 gene (4933426M11Rik), mRNA [NM_178682]
A_51_P139296	0.439679	Clip2	NM_009990	Mus musculus CAP-GLY domain containing linker protein 2 (Clip2), transcript variant 1, mRNA [NM_009990]
A_51_P430620	0.439763	Slc25a12	NM_172436	Mus musculus solute carrier family 25 (mitochondrial carrier, Aralar), member 12 (Slc25a12), mRNA [NM_172436]
A_51_P334571	0.440975	Uba52	NM_019883	Mus musculus ubiquitin A-52 residue ribosomal protein fusion product 1 (Uba52), mRNA [NM_019883]
A_52_P133016	0.441133	U59758	U59758	Mus musculus p53-variant (p53) mRNA, partial cds [U59758]
A_52_P234073	0.441159	Gla	NM_013463	Mus musculus galactosidase, alpha (Gla), mRNA [NM_013463]
A_51_P446978	0.441208	Cfdp1	NM_011801	Mus musculus craniofacial development protein 1 (Cfdp1), mRNA [NM_011801]
A_52_P545643	0.441764	AI597468	NM_001013028	Mus musculus expressed sequence AI597468 (AI597468), mRNA [NM_001013028]
A_52_P312398	0.441786	Ssr3	NM_026155	Mus musculus signal sequence receptor, gamma (Ssr3), mRNA [NM_026155]
A_52_P333419	0.441918	Nfatc3	NM_010901	Mus musculus nuclear factor of activated T-cells, cytoplasmic, calcineurin-dependent 3 (Nfatc3), mRNA [NM_010901]
A_51_P103499	0.442036	Spesp1	NM_025721	Mus musculus sperm equatorial segment protein 1 (Spesp1), mRNA [NM_025721]
A_52_P111438	0.442518	Psme4	NM_134013	Mus musculus proteasome (prosome, macropain) activator subunit 4 (Psme4), mRNA [NM_134013]
A_51_P311379	0.44314	Tnrc6a	NM_144925	Mus musculus trinucleotide repeat containing 6a (Tnrc6a), mRNA [NM_144925]
A_52_P101574	0.443248	EG384179		PREDICTED: Mus musculus similar to ribosomal protein L15 (LOC384179), mRNA [XM_357471]
A_51_P200622	0.443378	Bloc1s2	BC065806	Mus musculus biogenesis of lysosome-related organelles complex-1, subunit 2, mRNA (cDNA clone MGC:73814 IMAGE:1547643), complete cds. [BC065806]
A_51_P326994	0.443571	2810048G17Rik	NM_133746	Mus musculus RIKEN cDNA 2810048G17 gene (2810048G17Rik), mRNA [NM_133746]
A_52_P652513	0.443615	Lman1	NM_027400	Mus musculus lectin, mannose-binding, 1 (Lman1), mRNA [NM_027400]
A_51_P349435	0.443627	Rps12	NM_011295	Mus musculus ribosomal protein S12 (Rps12), mRNA [NM_011295]
A_52_P673519	0.443938	Nek1	NM_175089	Mus musculus NIMA (never in mitosis gene a)-related expressed kinase 1 (Nek1), mRNA [NM_175089]
A_52_P683957	0.44401	Arcn1	NM_145985	Mus musculus archain 1 (Arcn1), mRNA [NM_145985]
A_52_P87553	0.444391	LOC673028	XR_004104	PREDICTED: Mus musculus similar to 60S ribosomal protein L23a (LOC673028), mRNA [XR_004104]
A_52_P147521	0.444691	Flnb	NM_134080	Mus musculus filamin, beta (Flnb), mRNA [NM_134080]
A_51_P357207	0.444699	6820424L24Rik	NM_001081144	Mus musculus RIKEN cDNA 6820424L24 gene (6820424L24Rik), mRNA [NM_001081144]
A_52_P184042	0.444779	Adamts2	NM_175643	Mus musculus a disintegrin-like and metallopeptidase (reprolysin type) with thrombospondin type 1 motif, 2 (Adamts2), mRNA [NM_175643]
A_52_P594768	0.445027	Aprt	NM_009698	Mus musculus adenine phosphoribosyl transferase (Aprt), mRNA [NM_009698]
A_52_P273906	0.445096	4833405L11Rik	AK014656	Mus musculus 0 day neonate head cDNA, RIKEN full-length enriched library, clone:4833405L11 product:unclassifiable, full insert sequence [AK014656]
A_51_P492141	0.445151	Senp2	NM_029457	Mus musculus SUMO/sentrin specific peptidase 2 (Senp2), mRNA [NM_029457]
A_52_P96748	0.445271	Ttc30b	NM_028235	Mus musculus tetratricopeptide repeat domain 30B (Ttc30b), mRNA [NM_028235]
A_51_P218895	0.4454	Gaa	NM_008064	Mus musculus glucosidase, alpha, acid (Gaa), mRNA [NM_008064]
A_51_P247034	0.445446	Fbxl15	NM_133694	Mus musculus F-box and leucine-rich repeat protein 15 (Fbxl15), mRNA [NM_133694]
A_52_P266680	0.445494	Trpc4ap	NM_019828	Mus musculus transient receptor potential cation channel, subfamily C, member 4 associated protein (Trpc4ap), mRNA [NM_019828]
A_52_P583097	0.445538	EG244911	AK080627	Mus musculus 10 days neonate cortex cDNA, RIKEN full-length enriched library, clone:A830030H10 product:hypothetical protein, full insert sequence [AK080627]
A_52_P248483	0.445721	Zfx	NM_011768	Mus musculus zinc finger protein X-linked (Zfx), transcript variant 2, mRNA [NM_011768]
A_51_P363947	0.445759	Cdkn1a	NM_007669	Mus musculus cyclin-dependent kinase inhibitor 1A (P21) (Cdkn1a), mRNA [NM_007669]
A_52_P296682	0.445764	Pofut2	NM_030262	Mus musculus protein O-fucosyltransferase 2 (Pofut2), mRNA [NM_030262]
A_51_P312310	0.445915	Mtbp	NM_134092	Mus musculus Mdm2, transformed 3T3 cell double minute p53 binding protein (Mtbp), mRNA [NM_134092]
A_51_P517075	0.446072	Serpinf1	NM_011340	Mus musculus serine (or cysteine) peptidase inhibitor, clade F, member 1 (Serpinf1), mRNA [NM_011340]
A_51_P406115	0.446132	Adam10	NM_007399	Mus musculus a disintegrin and metallopeptidase domain 10 (Adam10), mRNA [NM_007399]
A_52_P547021	0.446346	Rpl19	NM_009078	Mus musculus ribosomal protein L19 (Rpl19), mRNA [NM_009078]
A_52_P368532	0.44637	Spry2	BG961926	602826618F1 NCI_CGAP_Co24 Mus musculus cDNA clone IMAGE:4981204 5', mRNA sequence [BG961926]
A_51_P484537	0.446488	Smc2	NM_008017	Mus musculus structural maintenance of chromosomes 2 (Smc2), mRNA [NM_008017]
A_52_P12346	0.446529	Rpl15	NM_025586	Mus musculus ribosomal protein L15 (Rpl15), mRNA [NM_025586]
A_52_P231428	0.446749	A430107O13Rik	NM_001081351	Mus musculus RIKEN cDNA A430107O13 gene (A430107O13Rik), mRNA [NM_001081351]
A_51_P243684	0.447494	Rps8	NM_009098	Mus musculus ribosomal protein S8 (Rps8), mRNA [NM_009098]
A_51_P179686	0.447977	1810048J11Rik	NM_026327	Mus musculus RIKEN cDNA 1810048J11 gene (1810048J11Rik), mRNA [NM_026327]
A_52_P535907	0.448242	BC031781	NM_145943	Mus musculus cDNA sequence BC031781 (BC031781), mRNA [NM_145943]
A_52_P668076	0.448258	Rpl13	NM_016738	Mus musculus ribosomal protein L13 (Rpl13), mRNA [NM_016738]
A_52_P340811	0.448317	Sufu	BC048168	Mus musculus suppressor of fused homolog (Drosophila), mRNA (cDNA clone MGC:61295 IMAGE:6821477), complete cds [BC048168]
A_52_P445958	0.448318	Pdxk	NM_172134	Mus musculus pyridoxal (pyridoxine, vitamin B6) kinase (Pdxk), mRNA [NM_172134]
A_51_P356762	0.448372	Mcm4	NM_008565	Mus musculus minichromosome maintenance deficient 4 homolog (S. cerevisiae) (Mcm4), mRNA [NM_008565]
A_51_P113106	0.448394	Dvl2	NM_007888	Mus musculus dishevelled 2, dsh homolog (Drosophila) (Dvl2), mRNA [NM_007888]
A_51_P228722	0.448531	Sec23a	NM_009147	Mus musculus SEC23A (S. cerevisiae) (Sec23a), mRNA [NM_009147]
A_51_P485458	0.448704	Txlna	NM_001005506	Mus musculus taxilin alpha (Txlna), mRNA [NM_001005506]
A_51_P335480	0.448962	1810055G02Rik	NM_028077	Mus musculus RIKEN cDNA 1810055G02 gene (1810055G02Rik), mRNA [NM_028077]
A_51_P485391	0.448997	Parn	NM_028761	Mus musculus poly(A)-specific ribonuclease (deadenylation nuclease) (Parn), mRNA [NM_028761]
A_52_P421220	0.449146	Dzip1	NM_025943	Mus musculus DAZ interacting protein 1 (Dzip1), mRNA [NM_025943]
A_51_P484959	0.449348	Rabep2	NM_030566	Mus musculus rabaptin, RAB GTPase binding effector protein 2 (Rabep2), mRNA [NM_030566]
A_51_P463109	0.449401	Cpsf6	AK077833	Mus musculus 13 days embryo forelimb cDNA, RIKEN full-length enriched library, clone:5930406E08 product:RIKEN cDNA 4733401N12 gene, full insert sequence [AK077833]
A_52_P449768	0.449402	Paics	NM_025939	Mus musculus phosphoribosylaminoimidazole carboxylase, phosphoribosylaminoribosylaminoimidazole, succinocarboxamide synthetase (Paics), mRNA [NM_025939]
A_51_P440865	0.449453	1700012H17Rik	NM_173426	Mus musculus RIKEN cDNA 1700012H17 gene (1700012H17Rik), mRNA [NM_173426]
A_52_P367760	0.449781	Calml4	NM_138304	Mus musculus calmodulin-like 4 (Calml4), mRNA [NM_138304]
A_52_P455580	0.449975	Rpl7	NM_011291	Mus musculus ribosomal protein L7 (Rpl7), mRNA [NM_011291]
A_52_P200960	0.449991	Pacsin1	NM_178365	Mus musculus protein kinase C and casein kinase substrate in neurons 1 (Pacsin1), mRNA [NM_178365]
A_52_P72487	0.450045	AJ237917	NM_011936	Mus musculus cDNA sequence AJ237917 (AJ237917), mRNA [NM_011936]
A_51_P183107	0.450064	Rnf139	NM_175226	Mus musculus ring finger protein 139 (Rnf139), mRNA [NM_175226]
A_52_P192106	0.450109	EG625054	NR_003363	Mus musculus predicted gene, EG625054 (EG625054) on chromosome 17 [NR_003363]
A_52_P482888	0.450202	Dlg5	AK147699	Mus musculus cDNA, RIKEN full-length enriched library, clone:M5C1109K17 product:discs, large homolog 5 (Drosophila), full insert sequence. [AK147699]
A_52_P597134	0.450251	Inpp5e	NM_033134	Mus musculus inositol polyphosphate-5-phosphatase E (Inpp5e), mRNA [NM_033134]
A_51_P378960	0.450312	2810474O19Rik	NM_026054	Mus musculus RIKEN cDNA 2810474O19 gene (2810474O19Rik), mRNA [NM_026054]
A_51_P168412	0.450508	Pdia3	M73329	Mus musculus phospholipase C-alpha (PLC-alpha) mRNA, complete cds. [M73329]
A_52_P65897	0.450688	Rpl22l1	AK170359	Mus musculus NOD-derived CD11c +ve dendritic cells cDNA, RIKEN full-length enriched library, clone:F630101B20 product:similar to 60S ribosomal protein L22 (Heparin binding protein HBp15) [Mus musculus], full insert sequence [AK170359]
A_52_P41668	0.450796	Eif4g2	NM_013507	Mus musculus eukaryotic translation initiation factor 4, gamma 2 (Eif4g2), transcript variant 1, mRNA [NM_013507]
A_52_P577770	0.450825	A230051N06Rik	AK080548	Mus musculus 7 days neonate cerebellum cDNA, RIKEN full-length enriched library, clone:A730083F13 product:unclassifiable, full insert sequence [AK080548]
A_51_P212271	0.450913	Tsga14	NM_031998	Mus musculus testis specific gene A14 (Tsga14), mRNA [NM_031998]
A_51_P265312	0.451094	Ggtl3	NM_144786	Mus musculus gamma-glutamyltransferase-like 3 (Ggtl3), mRNA [NM_144786]
A_51_P315795	0.451141	Tubb4	NM_009451	Mus musculus tubulin, beta 4 (Tubb4), mRNA [NM_009451]
A_51_P297671	0.451178	Gyk	NM_008194	Mus musculus glycerol kinase (Gyk), transcript variant 1, mRNA [NM_008194]
A_51_P196925	0.45142	Cx3cl1	NM_009142	Mus musculus chemokine (C-X3-C motif) ligand 1 (Cx3cl1), mRNA [NM_009142]
A_52_P645432	0.451601	TC1717038		P97770_MOUSE (P97770) ROSA26AS (THUMP domain containing 3) (12 days embryo eyeball cDNA, RIKEN full-length enriched library, clone:D230050F02 product:gene trap ROSA 26 antisense, Philippe Soriano, full insert sequence), partial (22%) [TC1717038]
A_52_P585475	0.451716	Gars	NM_180678	Mus musculus glycyl-tRNA synthetase (Gars), mRNA [NM_180678]
A_52_P3029	0.451791	Agpat4	NM_026644	Mus musculus 1-acylglycerol-3-phosphate O-acyltransferase 4 (lysophosphatidic acid acyltransferase, delta) (Agpat4), mRNA [NM_026644]
A_51_P417351	0.451826	EG114600	NM_053251	Mus musculus predicted gene, EG114600 (EG114600), mRNA [NM_053251]
A_52_P664506	0.452249	Abhd2	NM_018811	Mus musculus abhydrolase domain containing 2 (Abhd2), mRNA [NM_018811]
A_51_P379230	0.452271	Maf	NM_001025577	Mus musculus avian musculoaponeurotic fibrosarcoma (v-maf) AS42 oncogene homolog (Maf), mRNA [NM_001025577]
A_52_P626780	0.45267	Zfp64	BC004695	Mus musculus zinc finger protein 64, mRNA (cDNA clone MGC:5897 IMAGE:3498906), complete cds. [BC004695]
A_52_P479435	0.452671	Gfpt1	NM_013528	Mus musculus glutamine fructose-6-phosphate transaminase 1 (Gfpt1), mRNA [NM_013528]
A_51_P140721	0.452675	Chst14	NM_028117	Mus musculus carbohydrate (N-acetylgalactosamine 4-0) sulfotransferase 14 (Chst14), mRNA [NM_028117]
A_51_P382484	0.45273	Itgav	AK154307	Mus musculus NOD-derived CD11c +ve dendritic cells cDNA, RIKEN full-length enriched library, clone:F630017D17 product:integrin alpha V, full insert sequence [AK154307]
A_51_P179831	0.452881	AU040829	NM_175003	Mus musculus expressed sequence AU040829 (AU040829), mRNA [NM_175003]
A_52_P36900	0.453193	Ube2z	NM_172300	Mus musculus ubiquitin-conjugating enzyme E2Z (putative) (Ube2z), mRNA [NM_172300]
A_52_P117922	0.453212	LOC545547	XM_622329	PREDICTED: Mus musculus hypothetical LOC545547 (LOC545547), mRNA [XM_622329]
A_51_P101137	0.453348	Samd14	NM_146025	Mus musculus sterile alpha motif domain containing 14 (Samd14), transcript variant 1, mRNA [NM_146025]
A_51_P128945	0.453475	Rps27a	NM_024277	Mus musculus ribosomal protein S27a (Rps27a), transcript variant 1, mRNA [NM_024277]
A_52_P490263	0.453494	H2-M3	NM_013819	Mus musculus histocompatibility 2, M region locus 3 (H2-M3), mRNA [NM_013819]
A_52_P367384	0.453819	NAP029336-1
A_51_P200027	0.453854	Lims1	NM_026148	Mus musculus LIM and senescent cell antigen-like domains 1 (Lims1), mRNA [NM_026148]
A_51_P430817	0.45388	Dlg5	BC021314	Mus musculus discs, large homolog 5 (Drosophila), mRNA (cDNA clone IMAGE:5027138), complete cds. [BC021314]
A_52_P362144	0.454418	Tsga14	NM_031998	Mus musculus testis specific gene A14 (Tsga14), mRNA [NM_031998]
A_51_P153265	0.454774	Gla	U34071	Mus musculus alpha-galactosidase A mRNA, complete cds. [U34071]
A_51_P416995	0.454806	Rps16	NM_013647	Mus musculus ribosomal protein S16 (Rps16), mRNA [NM_013647]
A_51_P487813	0.455138	Lxn	NM_016753	Mus musculus latexin (Lxn), mRNA [NM_016753]
A_51_P295237	0.455293	Lrp11	NM_172784	Mus musculus low density lipoprotein receptor-related protein 11 (Lrp11), mRNA [NM_172784]
A_52_P592951	0.45536	2310008M10Rik	NM_025509	Mus musculus RIKEN cDNA 2310008M10 gene (2310008M10Rik), mRNA [NM_025509]
A_51_P115178	0.455377	Scara3	NM_172604	Mus musculus scavenger receptor class A, member 3 (Scara3), mRNA [NM_172604]
A_51_P218814	0.455595	Rpl22l1	NM_026517	Mus musculus ribosomal protein L22 like 1 (Rpl22l1), mRNA [NM_026517]
A_52_P460929	0.455667	BC048507	NM_001001185	Mus musculus cDNA sequence BC048507 (BC048507), mRNA [NM_001001185]
A_52_P49233	0.455764	Hif1an	NM_176958	Mus musculus hypoxia-inducible factor 1, alpha subunit inhibitor (Hif1an), mRNA [NM_176958]
A_52_P478629	0.455891	Arcn1	NM_145985	Mus musculus archain 1 (Arcn1), mRNA [NM_145985]
A_52_P41865	0.45612	ENSMUST00000064258
A_52_P445622	0.456122	2610002M06Rik	NM_025921	Mus musculus RIKEN cDNA 2610002M06 gene (2610002M06Rik), mRNA [NM_025921]
A_52_P89273	0.456225	Cbx8	AK051905	Mus musculus 12 days embryo eyeball cDNA, RIKEN full-length enriched library, clone:D230017K24 product:chromobox homolog 8 (Drosophila Pc class), full insert sequence. [AK051905]
A_51_P370561	0.456355	Dcakd	NM_026551	Mus musculus dephospho-CoA kinase domain containing (Dcakd), mRNA [NM_026551]
A_51_P415162	0.45641	Rpl19	NM_009078	Mus musculus ribosomal protein L19 (Rpl19), mRNA [NM_009078]
A_52_P384594	0.45683	Anapc1	AK090134	Mus musculus nullipotent stem cell CRL-2070 NE cDNA, RIKEN full-length enriched library, clone:G431003J08 product:meiotic check point regulator, full insert sequence [AK090134]
A_52_P935906	0.457122	Bcl7c	NM_009746	Mus musculus B-cell CLL/lymphoma 7C (Bcl7c), mRNA [NM_009746]
A_52_P544792	0.457159	Mtpn	NM_008098	Mus musculus myotrophin (Mtpn), mRNA [NM_008098]
A_52_P488908	0.457216	Hes7	NM_033041	Mus musculus hairy and enhancer of split 7 (Drosophila) (Hes7), mRNA [NM_033041]
A_52_P659258	0.457327	Ppat	BC023841	Mus musculus phosphoribosyl pyrophosphate amidotransferase, mRNA (cDNA clone MGC:38417 IMAGE:5346105), complete cds. [BC023841]
A_52_P239485	0.457345	AI450540	NM_145505	Mus musculus expressed sequence AI450540 (AI450540), mRNA [NM_145505]
A_52_P489729	0.457518	Sec61a1	NM_016906	Mus musculus Sec61 alpha 1 subunit (S. cerevisiae) (Sec61a1), mRNA [NM_016906]
A_52_P434038	0.45771	Lsm2	NM_030597	Mus musculus LSM2 homolog, U6 small nuclear RNA associated (S. cerevisiae) (Lsm2), mRNA [NM_030597]
A_52_P298972	0.458535	Ubxd7	AK147730	Mus musculus melanocyte cDNA, RIKEN full-length enriched library, clone:G270012C19 product:hypothetical protein, full insert sequence. [AK147730]
A_52_P370022	0.458807	NAP103162-1
A_52_P488640	0.458834	Lima1	NM_023063	Mus musculus LIM domain and actin binding 1 (Lima1), mRNA [NM_023063]
A_51_P267370	0.458933	Itm2c	NM_022417	Mus musculus integral membrane protein 2C (Itm2c), mRNA [NM_022417]
A_51_P448427	0.458957	Xpnpep1	NM_133216	Mus musculus X-prolyl aminopeptidase (aminopeptidase P) 1, soluble (Xpnpep1), mRNA [NM_133216]
A_51_P169588	0.458981	Dhx38	NM_178380	Mus musculus DEAH (Asp-Glu-Ala-His) box polypeptide 38 (Dhx38), mRNA [NM_178380]
A_52_P72654	0.459023	Slc25a17	NM_011399	Mus musculus solute carrier family 25 (mitochondrial carrier, peroxisomal membrane protein), member 17 (Slc25a17), mRNA [NM_011399]
A_51_P130727	0.459218	Fkbp11	NM_024169	Mus musculus FK506 binding protein 11 (Fkbp11), mRNA [NM_024169]
A_52_P579213	0.45933	NAP030391-1
A_51_P486217	0.459453	Wnk4	NM_175638	Mus musculus WNK lysine deficient protein kinase 4 (Wnk4), mRNA [NM_175638]
A_52_P345100	0.459498	Trim32	NM_053084	Mus musculus tripartite motif protein 32 (Trim32), mRNA [NM_053084]
A_51_P403234	0.459568	Hdac7a	NM_019572	Mus musculus histone deacetylase 7A (Hdac7a), mRNA [NM_019572]
A_51_P303725	0.459631	Tmem38a	NM_144534	Mus musculus transmembrane protein 38a (Tmem38a), mRNA [NM_144534]
A_52_P141662	0.45966	Tcfe2a	NM_011548	Mus musculus transcription factor E2a (Tcfe2a), mRNA [NM_011548]
A_51_P450854	0.459809	Ibrdc1	XM_193558	PREDICTED: Mus musculus IBR domain containing 1 (Ibrdc1), mRNA [XM_193558]
A_51_P511029	0.460013	Ankrd13d	NM_026720	Mus musculus ankyrin repeat domain 13 family, member D (Ankrd13d), mRNA [NM_026720]
A_51_P152784	0.460141	Chd9	NM_177224	Mus musculus chromodomain helicase DNA binding protein 9 (Chd9), mRNA [NM_177224]
A_51_P405129	0.460506	Ccdc96	NM_025725	Mus musculus coiled-coil domain containing 96 (Ccdc96), mRNA [NM_025725]
A_52_P164928	0.460936	Ttc21b	NM_001047604	Mus musculus tetratricopeptide repeat domain 21B (Ttc21b), mRNA [NM_001047604]
A_51_P313761	0.461141	Shmt2	NM_028230	Mus musculus serine hydroxymethyltransferase 2 (mitochondrial) (Shmt2), mRNA [NM_028230]
A_52_P463183	0.461225	Ddef1	AK147689	Mus musculus 14 days pregnant adult female placenta cDNA, RIKEN full-length enriched library, clone:M5C1108F01 product:development and differentiation enhancing, full insert sequence [AK147689]
A_51_P243288	0.461304	Rpl34	NM_026724	Mus musculus ribosomal protein L34 (Rpl34), transcript variant 1, mRNA [NM_026724]
A_52_P450528	0.461502	OTTMUSG00000007392	AK044415	Mus musculus adult retina cDNA, RIKEN full-length enriched library, clone:A930011G24 product:hypothetical protein, full insert sequence [AK044415]
A_52_P585104	0.462058	Fkbp4	NM_010219	Mus musculus FK506 binding protein 4 (Fkbp4), mRNA [NM_010219]
A_51_P229280	0.462641	Eif3s10	X17373	M.musculus mRNA for centrosomin A. [X17373]
A_51_P430563	0.462711	Mtpn	NM_008098	Mus musculus myotrophin (Mtpn), mRNA [NM_008098]
A_51_P108489	0.463637	Gtl3	NM_008187	Mus musculus gene trap locus 3 (Gtl3), mRNA [NM_008187]
A_51_P390354	0.463741	Nkpd1	AK009357	Mus musculus adult male tongue cDNA, RIKEN full-length enriched library, clone:2310015G09 product:hypothetical protein, full insert sequence. [AK009357]
A_52_P237451	0.463879	Anapc4	NM_024213	Mus musculus anaphase promoting complex subunit 4 (Anapc4), mRNA [NM_024213]
A_51_P324161	0.464271	Ankrd26	NM_001081112	Mus musculus ankyrin repeat domain 26 (Ankrd26), mRNA [NM_001081112]
A_51_P117995	0.464503	Pfkm	NM_021514	Mus musculus phosphofructokinase, muscle (Pfkm), mRNA [NM_021514]
A_51_P170577	0.464666	Nup43	AK011422	Mus musculus 10 days embryo whole body cDNA, RIKEN full-length enriched library, clone:2610016K01 product:OVARC1001161 PROTEIN homolog [Homo sapiens], full insert sequence. [AK011422]
A_52_P305748	0.464709	Tmem9	NM_025439	Mus musculus transmembrane protein 9 (Tmem9), mRNA [NM_025439]
A_51_P414637	0.464786	Col5a1	NM_015734	Mus musculus procollagen, type V, alpha 1 (Col5a1), mRNA [NM_015734]
A_52_P349318	0.464795	B3gat1	NM_029792	Mus musculus beta-1,3-glucuronyltransferase 1 (glucuronosyltransferase P) (B3gat1), mRNA [NM_029792]
A_51_P160328	0.465012	Cbx3	NM_007624	Mus musculus chromobox homolog 3 (Drosophila HP1 gamma) (Cbx3), mRNA [NM_007624]
A_51_P105408	0.465115	Alg14	NM_024178	Mus musculus asparagine-linked glycosylation 14 homolog (yeast) (Alg14), mRNA [NM_024178]
A_51_P416689	0.465245	Ext1	NM_010162	Mus musculus exostoses (multiple) 1 (Ext1), mRNA [NM_010162]
A_52_P178470	0.46538	Ndrg4	NM_145602	Mus musculus N-myc downstream regulated gene 4 (Ndrg4), mRNA [NM_145602]
A_52_P23041	0.465943	Rpl6	NM_011290	Mus musculus ribosomal protein L6 (Rpl6), mRNA [NM_011290]
A_51_P518586	0.466567	Emg1	NM_013536	Mus musculus EMG1 nucleolar protein homolog (S. cerevisiae) (Emg1), mRNA [NM_013536]
A_51_P144712	0.466601	Gbf1	NM_178930	Mus musculus golgi-specific brefeldin A-resistance factor 1 (Gbf1), mRNA [NM_178930]
A_52_P406191	0.466945	Samd1	NM_001081415	Mus musculus sterile alpha motif domain containing 1 (Samd1), mRNA [NM_001081415]
A_52_P554267	0.466947	Ilf3	NM_010561	Mus musculus interleukin enhancer binding factor 3 (Ilf3), transcript variant 1, mRNA [NM_010561]
A_52_P583399	0.467353	NAP030690-1
A_52_P281620	0.467701	Rbm4	NM_009032	Mus musculus RNA binding motif protein 4 (Rbm4), mRNA [NM_009032]
A_52_P377693	0.467877	Fsd1	NM_183178	Mus musculus fibronectin type 3 and SPRY domain-containing protein (Fsd1), mRNA [NM_183178]
A_52_P563245	0.468077	C530028O21Rik	NM_175696	Mus musculus RIKEN cDNA C530028O21 gene (C530028O21Rik), mRNA [NM_175696]
A_51_P439156	0.468191	2610020C11Rik	AB010313	Mus musculus mRNA for mszf12, partial cds. [AB010313]
A_52_P304881	0.468215	Smarca5	NM_053124	Mus musculus SWI/SNF related, matrix associated, actin dependent regulator of chromatin, subfamily a, member 5 (Smarca5), mRNA [NM_053124]
A_51_P359570	0.46862	Ifit3	NM_010501	Mus musculus interferon-induced protein with tetratricopeptide repeats 3 (Ifit3), mRNA [NM_010501]
A_51_P384318	0.468923	C1r	NM_023143	Mus musculus complement component 1, r subcomponent (C1r), mRNA [NM_023143]
A_52_P460270	0.468984	Sec13	NM_024206	Mus musculus SEC13 homolog (S. cerevisiae) (Sec13), mRNA [NM_024206]
A_51_P364639	0.469186	Krt71	NM_019956	Mus musculus keratin 71 (Krt71), mRNA [NM_019956]
A_51_P189104	0.470245	Ppap2a	NM_008903	Mus musculus phosphatidic acid phosphatase 2a (Ppap2a), transcript variant 2, mRNA [NM_008903]
A_52_P152926	0.470716	Rsrc1	NM_025822	Mus musculus arginine/serine-rich coiled-coil 1 (Rsrc1), mRNA [NM_025822]
A_52_P114141	0.470847	NAP046391-1
A_51_P368136	0.470923	Sorbs2	AK049030	Mus musculus 0 day neonate cerebellum cDNA, RIKEN full-length enriched library, clone:C230093F19 product:similar to ARG/ABL-INTERACTING PROTEIN ARGBP2A [Homo sapiens], full insert sequence. [AK049030]
A_52_P428521	0.470968	Fgd1	NM_008001	Mus musculus FYVE, RhoGEF and PH domain containing 1 (Fgd1), mRNA [NM_008001]
A_51_P287286	0.471011	Edn3	NM_007903	Mus musculus endothelin 3 (Edn3), mRNA [NM_007903]
A_51_P256884	0.471357	BC060632	NM_198625	Mus musculus cDNA sequence BC060632 (BC060632), mRNA [NM_198625]
A_52_P110541	0.471505	E030018N11Rik	NM_001033380	Mus musculus RIKEN cDNA E030018N11 gene (E030018N11Rik), mRNA [NM_001033380]
A_51_P148037	0.471778	Sh3pxd2b	NM_177364	Mus musculus SH3 and PX domains 2B (Sh3pxd2b), mRNA [NM_177364]
A_51_P189927	0.47191	Tm7sf3	NM_026281	Mus musculus transmembrane 7 superfamily member 3 (Tm7sf3), mRNA [NM_026281]
A_52_P516893	0.472236	Zfp35	NM_011755	Mus musculus zinc finger protein 35 (Zfp35), mRNA [NM_011755]
A_52_P36586	0.472266	Hdlbp	NM_133808	Mus musculus high density lipoprotein (HDL) binding protein (Hdlbp), mRNA [NM_133808]
A_52_P257590	0.472667	Tgif1	NM_009372	Mus musculus TG interacting factor 1 (Tgif1), mRNA [NM_009372]
A_51_P172054	0.472684	Gas6	NM_019521	Mus musculus growth arrest specific 6 (Gas6), mRNA [NM_019521]
A_52_P403246	0.472699	B230217C12Rik	NM_001080935	Mus musculus RIKEN cDNA B230217C12 gene (B230217C12Rik), mRNA [NM_001080935]
A_51_P491470	0.473096	Ddx47	NM_026360	Mus musculus DEAD (Asp-Glu-Ala-Asp) box polypeptide 47 (Ddx47), mRNA [NM_026360]
A_52_P450918	0.473439	Rab3il1	NM_144538	Mus musculus RAB3A interacting protein (rabin3)-like 1 (Rab3il1), mRNA [NM_144538]
A_52_P119117	0.473465	1810006K21Rik	AK145833	Mus musculus 13 days pregnant adult female placenta cDNA, RIKEN full-length enriched library, clone:I530004D22 product:NEF1 protein homolog [Gallus gallus], full insert sequence. [AK145833]
A_51_P101506	0.473499	Hif3a	NM_016868	Mus musculus hypoxia inducible factor 3, alpha subunit (Hif3a), mRNA [NM_016868]
A_51_P203420	0.473573	Rpl13	NM_016738	Mus musculus ribosomal protein L13 (Rpl13), mRNA [NM_016738]
A_52_P289685	0.473833	Ssbp1	NM_028358	Mus musculus single-stranded DNA binding protein 1 (Ssbp1), transcript variant 2, mRNA [NM_028358]
A_51_P255899	0.474308	Tgfbr3	NM_011578	Mus musculus transforming growth factor, beta receptor III (Tgfbr3), mRNA [NM_011578]
A_52_P36344	0.474509	LOC636537	XM_911969	PREDICTED: Mus musculus similar to signal sequence receptor, alpha (LOC636537), mRNA [XM_911969]
A_52_P500597	0.474668	EG237412	XM_984921	PREDICTED: Mus musculus similar to RIKEN cDNA 3000002G13 (LOC237412), mRNA [XM_984921]
A_51_P346165	0.47482	Agpat4	NM_026644	Mus musculus 1-acylglycerol-3-phosphate O-acyltransferase 4 (lysophosphatidic acid acyltransferase, delta) (Agpat4), mRNA [NM_026644]
A_52_P315030	0.47487	LOC669592	XR_002648	PREDICTED: Mus musculus hypothetical protein LOC669592 (LOC669592), mRNA [XR_002648]
A_51_P245718	0.475333	A630082K20Rik	NM_001033430	Mus musculus RIKEN cDNA A630082K20 gene (A630082K20Rik), mRNA [NM_001033430]
A_51_P167746	0.47537	St5	NM_001001326	Mus musculus suppression of tumorigenicity 5 (St5), transcript variant 1, mRNA [NM_001001326]
A_51_P462546	0.475536	Gmppa	NM_133708	Mus musculus GDP-mannose pyrophosphorylase A (Gmppa), mRNA [NM_133708]
A_51_P308726	0.475559	Ergic3	NM_025516	Mus musculus ERGIC and golgi 3 (Ergic3), mRNA [NM_025516]
A_51_P312936	0.475711	Rps24	NM_207634	Mus musculus ribosomal protein S24 (Rps24), transcript variant 2, mRNA [NM_207634]
A_52_P274452	0.475837	Atf7	NM_146065	Mus musculus activating transcription factor 7 (Atf7), mRNA [NM_146065]
A_51_P445985	0.475852	Slc12a3	NM_019415	Mus musculus solute carrier family 12, member 3 (Slc12a3), mRNA [NM_019415]
A_51_P480427	0.475983	Olfr430	NM_146718	Mus musculus olfactory receptor 430 (Olfr430), mRNA [NM_146718]
A_51_P324551	0.476057	Fbxo25	NM_025785	Mus musculus F-box protein 25 (Fbxo25), mRNA [NM_025785]
A_52_P495192	0.476272	D9Ertd280e	NM_177775	Mus musculus DNA segment, Chr 9, ERATO Doi 280, expressed (D9Ertd280e), mRNA [NM_177775]
A_52_P381484	0.476624	Spon2	NM_133903	Mus musculus spondin 2, extracellular matrix protein (Spon2), mRNA [NM_133903]
A_52_P196972	0.476739	ENSMUST00000071458		PREDICTED: Mus musculus similar to 40S ribosomal protein S2, transcript variant 1 (LOC546797), mRNA [XM_902301]
A_51_P127367	0.477028	Isgf3g	NM_008394	Mus musculus interferon dependent positive acting transcription factor 3 gamma (Isgf3g), mRNA [NM_008394]
A_52_P339495	0.477101	Pdia6	NM_027959	Mus musculus protein disulfide isomerase associated 6 (Pdia6), mRNA [NM_027959]
A_52_P345237	0.477138	Olfr564	NM_146359	Mus musculus olfactory receptor 564 (Olfr564), mRNA [NM_146359]
A_52_P131372	0.477178	LOC633908	XM_913504	PREDICTED: Mus musculus similar to 40S ribosomal protein S19 (LOC633908), mRNA [XM_913504]
A_51_P365980	0.477235	2310022B05Rik	NM_175149	Mus musculus RIKEN cDNA 2310022B05 gene (2310022B05Rik), mRNA [NM_175149]
A_51_P386585	0.477387	Gpsm1	NM_153410	Mus musculus G-protein signalling modulator 1 (AGS3-like, C. elegans) (Gpsm1), mRNA [NM_153410]
A_51_P489779	0.477412	Cdk6	AK030810	Mus musculus adult male thymus cDNA, RIKEN full-length enriched library, clone:5830411I20 product:unclassifiable, full insert sequence [AK030810]
A_52_P81664	0.477788	NAP025822-1
A_52_P528592	0.477812	Rbm9	NM_175387	Mus musculus RNA binding motif protein 9 (Rbm9), transcript variant 2, mRNA [NM_175387]
A_52_P132983	0.478115	ENSMUST00000077435		similar to 60S ribosomal protein L6 (TAX-responsive enhancer element binding protein 107) (TAXREB107) (LOC636184), mRNA [Source:RefSeq_dna;Acc:XR_003691] [ENSMUST00000077435]
A_52_P141161	0.478355	Hnrpf	NM_133834	Mus musculus heterogeneous nuclear ribonucleoprotein F (Hnrpf), mRNA [NM_133834]
A_52_P183152	0.478656	Txnl1	NM_016792	Mus musculus thioredoxin-like 1 (Txnl1), mRNA [NM_016792]
A_52_P577150	0.47866	Arnt	NM_009709	Mus musculus aryl hydrocarbon receptor nuclear translocator (Arnt), transcript variant 2, mRNA [NM_009709]
A_51_P428505	0.478753	Krtcap2	NM_025327	Mus musculus keratinocyte associated protein 2 (Krtcap2), mRNA [NM_025327]
A_52_P434039	0.478782	Lsm2	NM_030597	Mus musculus LSM2 homolog, U6 small nuclear RNA associated (S. cerevisiae) (Lsm2), mRNA [NM_030597]
A_51_P451759	0.478913	Rab3il1	BC020147	Mus musculus RAB3A interacting protein (rabin3)-like 1, mRNA (cDNA clone MGC:28059 IMAGE:3708973), complete cds. [BC020147]
A_52_P622197	0.478927	NAP029477-1
A_51_P465772	0.478965	Ruvbl1	NM_019685	Mus musculus RuvB-like protein 1 (Ruvbl1), mRNA [NM_019685]
A_51_P146576	0.479143	Arl6	NM_019665	Mus musculus ADP-ribosylation factor-like 6 (Arl6), mRNA [NM_019665]
A_52_P365528	0.479361	Katnal1	NM_153572	Mus musculus katanin p60 subunit A-like 1 (Katnal1), mRNA [NM_153572]
A_52_P502577	0.47942	Edg3	NM_010101	Mus musculus endothelial differentiation, sphingolipid G-protein-coupled receptor, 3 (Edg3), mRNA [NM_010101]
A_52_P420466	0.47963	Hist1h2ab	NM_175660	Mus musculus histone cluster 1, H2ab (Hist1h2ab), mRNA [NM_175660]
A_52_P215136	0.479819	Dusp11	NM_028099	Mus musculus dual specificity phosphatase 11 (RNA/RNP complex 1-interacting) (Dusp11), mRNA [NM_028099]
A_52_P217069	0.479819	Rpl29	NM_009082	Mus musculus ribosomal protein L29 (Rpl29), mRNA [NM_009082]
A_51_P191782	0.480159	Olfml3	NM_133859	Mus musculus olfactomedin-like 3 (Olfml3), mRNA [NM_133859]
A_51_P345902	0.480225	Dohh	NM_133964	Mus musculus deoxyhypusine hydroxylase/monooxygenase (Dohh), mRNA [NM_133964]
A_51_P436020	0.480269	Tmem167	NM_025335	Mus musculus transmembrane protein 167 (Tmem167), mRNA [NM_025335]
A_51_P184928	0.480514	Ifitm7	NM_028968	Mus musculus interferon induced transmembrane protein 7 (Ifitm7), mRNA [NM_028968]
A_52_P58006	0.480582	Acbd3	NM_133225	Mus musculus acyl-Coenzyme A binding domain containing 3 (Acbd3), mRNA [NM_133225]
A_51_P328652	0.481016	Acot7	NM_133348	Mus musculus acyl-CoA thioesterase 7 (Acot7), mRNA [NM_133348]
A_51_P402760	0.481036	Pla2g4a	NM_008869	Mus musculus phospholipase A2, group IVA (cytosolic, calcium-dependent) (Pla2g4a), mRNA [NM_008869]
A_51_P498720	0.481268	Cacna2d1	NM_009784	Mus musculus calcium channel, voltage-dependent, alpha2/delta subunit 1 (Cacna2d1), mRNA [NM_009784]
A_51_P313561	0.481374	Lmna	NM_019390	Mus musculus lamin A (Lmna), transcript variant 2, mRNA [NM_019390]
A_51_P416419	0.481549	Calr	NM_007591	Mus musculus calreticulin (Calr), mRNA [NM_007591]
A_51_P442746	0.481702	Lgr4	NM_172671	Mus musculus leucine-rich repeat-containing G protein-coupled receptor 4 (Lgr4), mRNA [NM_172671]
A_51_P467490	0.481881	D330037H05Rik	NM_001080948	Mus musculus RIKEN cDNA D330037H05 gene (D330037H05Rik), transcript variant 2, mRNA [NM_001080948]
A_51_P258766	0.48197	Smo	NM_176996	Mus musculus smoothened homolog (Drosophila) (Smo), mRNA [NM_176996]
A_52_P304902	0.482329	Hspa1a	NM_010479	Mus musculus heat shock protein 1A (Hspa1a), mRNA [NM_010479]
A_52_P351638	0.482464	Tnfrsf10b	NM_020275	Mus musculus tumor necrosis factor receptor superfamily, member 10b (Tnfrsf10b), mRNA [NM_020275]
A_51_P175736	0.482603	Yif1a	NM_026553	Mus musculus Yip1 interacting factor homolog A (S. cerevisiae) (Yif1a), mRNA [NM_026553]
A_52_P127024	0.482854	Tnks	NM_175091	Mus musculus tankyrase, TRF1-interacting ankyrin-related ADP-ribose polymerase (Tnks), mRNA [NM_175091]
A_52_P37681	0.482872	Fkbp9	NM_012056	Mus musculus FK506 binding protein 9 (Fkbp9), mRNA [NM_012056]
A_51_P261379	0.483465	Spats2	NM_139140	Mus musculus spermatogenesis associated, serine-rich 2 (Spats2), mRNA [NM_139140]
A_52_P151378	0.483481	EG280121	XM_207492	PREDICTED: Mus musculus similar to ribosomal protein P1 isoform 2, transcript variant 1 (LOC280121), mRNA [XM_207492]
A_51_P196444	0.483837	Foxc2	NM_013519	Mus musculus forkhead box C2 (Foxc2), mRNA [NM_013519]
A_52_P491766	0.483973	Gna-rs1	NM_008136	Mus musculus guanine nucleotide binding protein, related sequence 1 (Gna-rs1), mRNA [NM_008136]
A_52_P309884	0.484126	TC1707173		Q5HY50_HUMAN (Q5HY50) Ribosomal protein L10 (Fragment), partial (47%) [TC1707173]
A_52_P281235	0.484423	Vps18	NM_172269	Mus musculus vacuolar protein sorting 18 (yeast) (Vps18), mRNA [NM_172269]
A_51_P172502	0.484671	Cxcl12	NM_013655	Mus musculus chemokine (C-X-C motif) ligand 12 (Cxcl12), transcript variant 2, mRNA [NM_013655]
A_51_P272728	0.484703	Tmem165	AK007181	Mus musculus adult male testis cDNA, RIKEN full-length enriched library, clone:1700112L04 product:TPA regulated locus, full insert sequence. [AK007181]
A_51_P122180	0.484862	Zfp451	BC019546	Mus musculus zinc finger protein 451, mRNA (cDNA clone MGC:28438 IMAGE:4038791), complete cds. [BC019546]
A_51_P292057	0.485257	Tbl1xr1	NM_030732	Mus musculus transducin (beta)-like 1X-linked receptor 1 (Tbl1xr1), mRNA [NM_030732]
A_52_P323484	0.48538	Islr	NM_012043	Mus musculus immunoglobulin superfamily containing leucine-rich repeat (Islr), mRNA [NM_012043]
A_51_P507234	0.485509	5330426P16Rik	XM_992800	PREDICTED: Mus musculus RIKEN cDNA 5330426P16 gene (5330426P16Rik), mRNA [XM_992800]
A_51_P227332	0.485604	Rpl38	NM_023372	Mus musculus ribosomal protein L38 (Rpl38), transcript variant 2, mRNA [NM_023372]
A_51_P230075	0.485701	Amh	NM_007445	Mus musculus anti-Mullerian hormone (Amh), mRNA [NM_007445]
A_51_P497451	0.48597	Rbms3	NM_178660	Mus musculus RNA binding motif, single stranded interacting protein (Rbms3), mRNA [NM_178660]
A_51_P289836	0.486023	Slc29a1	NM_022880	Mus musculus solute carrier family 29 (nucleoside transporters), member 1 (Slc29a1), mRNA [NM_022880]
A_51_P227392	0.486176	Rhou	NM_133955	Mus musculus ras homolog gene family, member U (Rhou), mRNA [NM_133955]
A_52_P538950	0.486669	B230369F24Rik	AK046316	Mus musculus adult male corpora quadrigemina cDNA, RIKEN full-length enriched library, clone:B230369F24 product:similar to RIBOSOMAL PROTEIN L27A (RIBOSMAL PROTEIN L27A) [Mus musculus], full insert sequence [AK046316]
A_52_P399140	0.486718	Tmem138	NM_028411	Mus musculus transmembrane protein 138 (Tmem138), mRNA [NM_028411]
A_52_P625007	0.486831	TC1716094		RS2_MOUSE (P25444) 40S ribosomal protein S2 (S4) (LLRep3 protein), partial (83%) [TC1716094]
A_52_P4937	0.486928	Lig3	NM_010716	Mus musculus ligase III, DNA, ATP-dependent (Lig3), mRNA [NM_010716]
A_51_P430728	0.487328	Hoxd9	NM_013555	Mus musculus homeo box D9 (Hoxd9), mRNA [NM_013555]
A_51_P201661	0.487538	Xrcc5	NM_009533	Mus musculus X-ray repair complementing defective repair in Chinese hamster cells 5 (Xrcc5), mRNA [NM_009533]
A_51_P185175	0.487726	Fkbp4	NM_010219	Mus musculus FK506 binding protein 4 (Fkbp4), mRNA [NM_010219]
A_51_P181623	0.487952	Zfp428	NM_146183	Mus musculus zinc finger protein 428 (Zfp428), mRNA [NM_146183]
A_52_P79385	0.488092	2610529C04Rik	NM_025952	Mus musculus RIKEN cDNA 2610529C04 gene (2610529C04Rik), mRNA [NM_025952]
A_52_P373369	0.488196	Phc1	NM_007905	Mus musculus polyhomeotic-like 1 (Drosophila) (Phc1), transcript variant 1, mRNA [NM_007905]
A_51_P516452	0.488682	Eif3s5	NM_025344	Mus musculus eukaryotic translation initiation factor 3, subunit 5 (epsilon) (Eif3s5), mRNA [NM_025344]
A_52_P424640	0.488914	Etnk1	AK044502	Mus musculus adult retina cDNA, RIKEN full-length enriched library, clone:A930017F14 product:ETHANOLAMINE KINASE (EC 2.7.1.82) (EKI) homolog [Homo sapiens], full insert sequence. [AK044502]
A_52_P189455	0.488966	Vps18	NM_172269	Mus musculus vacuolar protein sorting 18 (yeast) (Vps18), mRNA [NM_172269]
A_51_P375039	0.488985	Slc25a17	NM_011399	Mus musculus solute carrier family 25 (mitochondrial carrier, peroxisomal membrane protein), member 17 (Slc25a17), mRNA [NM_011399]
A_51_P290290	0.489189	Prkcc	NM_011102	Mus musculus protein kinase C, gamma (Prkcc), mRNA [NM_011102]
A_52_P662036	0.489304	Tnrc15	NM_146112	Mus musculus trinucleotide repeat containing 15 (Tnrc15), mRNA [NM_146112]
A_52_P189338	0.489703	LOC671203	XR_003328	PREDICTED: Mus musculus similar to 40S ribosomal protein S2 (LOC671203), mRNA [XR_003328]
A_51_P416974	0.489762	Pbx3	NM_016768	Mus musculus pre B-cell leukemia transcription factor 3 (Pbx3), mRNA [NM_016768]
A_51_P318642	0.490083	Rps3	NM_012052	Mus musculus ribosomal protein S3 (Rps3), mRNA [NM_012052]
A_52_P128180	0.490133	Slc5a7	NM_022025	Mus musculus solute carrier family 5 (choline transporter), member 7 (Slc5a7), mRNA [NM_022025]
A_52_P147778	0.49055	Fgfr1op	NM_201230	Mus musculus Fgfr1 oncogene partner (Fgfr1op), mRNA [NM_201230]
A_52_P180728	0.490939	Kbtbd11	BC080858	Mus musculus kelch repeat and BTB (POZ) domain containing 11, mRNA (cDNA clone MGC:90804 IMAGE:6852896), complete cds. [BC080858]
A_51_P166288	0.490992	Acy1	NM_025371	Mus musculus aminoacylase 1 (Acy1), mRNA [NM_025371]
A_51_P193563	0.491081	Cdk7	NM_009874	Mus musculus cyclin-dependent kinase 7 (homolog of Xenopus MO15 cdk-activating kinase) (Cdk7), mRNA [NM_009874]
A_52_P553673	0.491203	Ttc17	NM_183106	Mus musculus tetratricopeptide repeat domain 17 (Ttc17), mRNA [NM_183106]
A_52_P268549	0.491325	5930416I19Rik	NM_197981	Mus musculus RIKEN cDNA 5930416I19 gene (5930416I19Rik), mRNA [NM_197981]
A_51_P362514	0.491467	Ier5l	NM_030244	Mus musculus immediate early response 5-like (Ier5l), mRNA [NM_030244]
A_51_P305537	0.491474	St3gal2	NM_009179	Mus musculus ST3 beta-galactoside alpha-2,3-sialyltransferase 2 (St3gal2), transcript variant 1, mRNA [NM_009179]
A_51_P122425	0.491499	Ctf1	NM_007795	Mus musculus cardiotrophin 1 (Ctf1), mRNA [NM_007795]
A_52_P491569	0.491723	1700017B05Rik	NM_028820	Mus musculus RIKEN cDNA 1700017B05 gene (1700017B05Rik), mRNA [NM_028820]
A_52_P139727	0.491864	Atf4	NM_009716	Mus musculus activating transcription factor 4 (Atf4), mRNA [NM_009716]
A_52_P9289	0.491884	1110033M05Rik	AK166285	Mus musculus mammary gland RCB-0526 Jyg-MC(A) cDNA, RIKEN full-length enriched library, clone:G830031C24 product:hypothetical Endoplasmic reticulum targeting sequence containing protein, full insert sequence. [AK166285]
A_52_P178393	0.491904	Arid4b	NM_194262	Mus musculus AT rich interactive domain 4B (Rbp1 like) (Arid4b), transcript variant 1, mRNA [NM_194262]
A_52_P82636	0.492056	Tigd3	NM_198634	Mus musculus tigger transposable element derived 3 (Tigd3), mRNA [NM_198634]
A_51_P294535	0.492091	Unc5b	NM_029770	Mus musculus unc-5 homolog B (C. elegans) (Unc5b), mRNA [NM_029770]
A_51_P483373	0.492423	Txndc5	NM_145367	Mus musculus thioredoxin domain containing 5 (Txndc5), mRNA [NM_145367]
A_51_P328725	0.492569	Snf1lk	NM_010831	Mus musculus SNF1-like kinase (Snf1lk), mRNA [NM_010831]
A_52_P624572	0.49261	Bmpr1a	NM_009758	Mus musculus bone morphogenetic protein receptor, type 1A (Bmpr1a), mRNA [NM_009758]
A_52_P524010	0.492701	2410024A21Rik	NM_029654	Mus musculus RIKEN cDNA 2410024A21 gene (2410024A21Rik), mRNA [NM_029654]
A_51_P482473	0.492753	Rps17	NM_009092	Mus musculus ribosomal protein S17 (Rps17), mRNA [NM_009092]
A_52_P207203	0.49295	Smarca5	NM_053124	Mus musculus SWI/SNF related, matrix associated, actin dependent regulator of chromatin, subfamily a, member 5 (Smarca5), mRNA [NM_053124]
A_52_P76196	0.493437	ENSMUST00000071458		PREDICTED: Mus musculus similar to 40S ribosomal protein S2, transcript variant 1 (LOC546797), mRNA [XM_902301]
A_52_P304798	0.493481	Ube2h	NM_009459	Mus musculus ubiquitin-conjugating enzyme E2H (Ube2h), mRNA [NM_009459]
A_52_P468451	0.493794	NAP106314-1
A_51_P187898	0.493851	H60	NM_010400	Mus musculus histocompatibility 60 (H60), mRNA [NM_010400]
A_52_P357133	0.494063	Selm	NM_053267	Mus musculus selenoprotein M (Selm), mRNA [NM_053267]
A_51_P344734	0.494066	Rps6	NM_009096	Mus musculus ribosomal protein S6 (Rps6), mRNA [NM_009096]
A_52_P403443	0.494212	Tns3	NM_001083587	Mus musculus tensin 3 (Tns3), mRNA [NM_001083587]
A_51_P387878	0.494408	Rpl22	NM_009079	Mus musculus ribosomal protein L22 (Rpl22), mRNA [NM_009079]
A_52_P229167	0.494459	EG546361		PREDICTED: Mus musculus similar to 60S ribosomal protein L27a (LOC546361), mRNA [XM_621072]
A_51_P121547	0.49457	Bmi1	NM_007552	Mus musculus Bmi1 polycomb ring finger oncogene (Bmi1), mRNA [NM_007552]
A_52_P318631	0.494762	Eef2	NM_007907	Mus musculus eukaryotic translation elongation factor 2 (Eef2), mRNA [NM_007907]
A_52_P670812	0.494846	0610007N19Rik	AK002304	Mus musculus adult male kidney cDNA, RIKEN full-length enriched library, clone:0610007N19 product:unclassifiable, full insert sequence [AK002304]
A_51_P414518	0.495365	Dynll1	NM_019682	Mus musculus dynein light chain LC8-type 1 (Dynll1), mRNA [NM_019682]
A_52_P40168	0.495384	ENSMUST00000100152
A_52_P269942	0.495544	Cpt1c	NM_153679	Mus musculus carnitine palmitoyltransferase 1c (Cpt1c), mRNA [NM_153679]
A_52_P125550	0.495654	Rhod	NM_007485	Mus musculus ras homolog gene family, member D (Rhod), mRNA [NM_007485]
A_51_P315666	0.495856	Nid2	NM_008695	Mus musculus nidogen 2 (Nid2), mRNA [NM_008695]
A_51_P223144	0.495977	Add3	NM_013758	Mus musculus adducin 3 (gamma) (Add3), mRNA [NM_013758]
A_51_P331661	0.496397	Ubiad1	NM_027873	Mus musculus UbiA prenyltransferase domain containing 1 (Ubiad1), mRNA [NM_027873]
A_51_P363634	0.496564	Snrpe	NM_009227	Mus musculus small nuclear ribonucleoprotein E (Snrpe), mRNA [NM_009227]
A_51_P237553	0.496638	Akt1	NM_009652	Mus musculus thymoma viral proto-oncogene 1 (Akt1), mRNA [NM_009652]
A_51_P135379	0.496719	Tceal8	NM_025703	Mus musculus transcription elongation factor A (SII)-like 8 (Tceal8), mRNA [NM_025703]
A_51_P115441	0.496915	Dpysl3	NM_009468	Mus musculus dihydropyrimidinase-like 3 (Dpysl3), mRNA [NM_009468]
A_51_P125157	0.497036	Tpd52l2	NM_025482	Mus musculus tumor protein D52-like 2 (Tpd52l2), mRNA [NM_025482]
A_51_P104897	0.497077	Itpr3	NM_080553	Mus musculus inositol 1,4,5-triphosphate receptor 3 (Itpr3), mRNA [NM_080553]
A_52_P452599	0.497079	Bcdo2	NM_133217	Mus musculus beta-carotene 9', 10'-dioxygenase 2 (Bcdo2), mRNA [NM_133217]
A_51_P269216	0.49708	Atf5	NM_030693	Mus musculus activating transcription factor 5 (Atf5), mRNA [NM_030693]
A_51_P434803	0.497237	Cox7a2l	NM_009187	Mus musculus cytochrome c oxidase subunit VIIa polypeptide 2-like (Cox7a2l), mRNA [NM_009187]
A_51_P133138	0.497247	Kif20a	Y09632	Mus musculus mRNA for rabkinesin-6. [Y09632]
A_51_P368450	0.497259	EG381818		predicted gene, EG381818 [Source:MarkerSymbol;Acc:MGI:3646668] [ENSMUST00000087849]
A_51_P346923	0.497356	Lepre1	NM_019782	Mus musculus leprecan 1 (Lepre1), transcript variant 1, mRNA [NM_019782]
A_51_P204390	0.497399	Sec61g	NM_011343	Mus musculus SEC61, gamma subunit (Sec61g), mRNA [NM_011343]
A_51_P219098	0.497434	Odf3	NM_027019	Mus musculus outer dense fiber of sperm tails 3 (Odf3), mRNA [NM_027019]
A_51_P371876	0.497686	Prkcbp1	NM_027230	Mus musculus protein kinase C binding protein 1 (Prkcbp1), mRNA [NM_027230]
A_52_P186485	0.497804	NAP042348-1
A_51_P356916	0.49781	Nup98	NM_022979	Mus musculus nucleoporin 98 (Nup98), mRNA [NM_022979]
A_51_P363515	0.497896	Rpl26	NM_009080	Mus musculus ribosomal protein L26 (Rpl26), mRNA [NM_009080]
A_51_P176068	0.498114	4732496O08Rik	NM_172877	Mus musculus RIKEN cDNA 4732496O08 gene (4732496O08Rik), mRNA [NM_172877]
A_51_P443482	0.498123	Hnrpa3	NM_146130	Mus musculus heterogeneous nuclear ribonucleoprotein A3 (Hnrpa3), transcript variant b, mRNA [NM_146130]
A_51_P105810	0.498276	Gtf3c5	NM_148928	Mus musculus general transcription factor IIIC, polypeptide 5 (Gtf3c5), mRNA [NM_148928]
A_51_P365222	0.498287	Eif3s6	NM_008388	Mus musculus eukaryotic translation initiation factor 3, subunit 6 (Eif3s6), mRNA [NM_008388]
A_52_P675530	0.498357	Fat4	NM_183221	Mus musculus FAT tumor suppressor homolog 4 (Drosophila) (Fat4), mRNA [NM_183221]
A_52_P600274	0.498372	Trib3	NM_175093	Mus musculus tribbles homolog 3 (Drosophila) (Trib3), mRNA [NM_175093]
A_51_P168738	0.498519	Rpl27	NM_011289	Mus musculus ribosomal protein L27 (Rpl27), mRNA [NM_011289]
A_51_P491144	0.498631	Qser1	XM_130565	PREDICTED: Mus musculus glutamine and serine rich 1, transcript variant 1 (Qser1), mRNA [XM_130565]
A_52_P506871	0.499129	Btbd7	NM_172806	Mus musculus BTB (POZ) domain containing 7 (Btbd7), mRNA [NM_172806]
A_51_P441263	0.499166	Rpl37a	NM_009084	Mus musculus ribosomal protein L37a (Rpl37a), mRNA [NM_009084]
A_51_P276652	0.499188	Rbm12	NM_029397	Mus musculus RNA binding motif protein 12 (Rbm12), transcript variant 1, mRNA [NM_029397]
A_52_P104761	0.499402	Rnf12	NM_011276	Mus musculus ring finger protein 12 (Rnf12), mRNA [NM_011276]
A_52_P260069	0.499461	CN716893	NM_001033492	Mus musculus expressed sequence CN716893 (CN716893), mRNA [NM_001033492]
A_51_P504902	0.49947	Setd5	NM_028385	Mus musculus SET domain containing 5 (Setd5), mRNA [NM_028385]
A_51_P323299	0.499634	Trim28	NM_011588	Mus musculus tripartite motif protein 28 (Trim28), mRNA [NM_011588]
A_52_P302598	0.499779	Ap1g1	NM_009677	Mus musculus adaptor protein complex AP-1, gamma 1 subunit (Ap1g1), mRNA [NM_009677]
A_51_P317782	0.499803	Ints5	NM_176843	Mus musculus integrator complex subunit 5 (Ints5), mRNA [NM_176843]
A_51_P187632	0.499864	Dnalc1	NM_028821	Mus musculus dynein, axonemal, light chain 1 (Dnalc1), mRNA [NM_028821]

## Sheet: Hif1a-Up
ProbeName	Fold change	GeneSymbol	GenbankAccession	Description
A_51_P156955	13.4188	Cfd	NM_013459	Mus musculus complement factor D (adipsin) (Cfd), mRNA [NM_013459]
A_52_P483983	11.8906	NAP025923-1
A_52_P132591	10.7463	ENSMUST00000103201		acetyl-Coenzyme A carboxylase alpha [Source:MarkerSymbol;Acc:MGI:108451] [ENSMUST00000103201]
A_51_P172155	10.6417	Hal	NM_010401	Mus musculus histidine ammonia lyase (Hal), mRNA [NM_010401]
A_51_P323712	10.4281	Agt	NM_007428	Mus musculus angiotensinogen (serpin peptidase inhibitor, clade A, member 8) (Agt), mRNA [NM_007428]
A_52_P639461	9.55514	Car3	AK075630	Mus musculus 18-day embryo whole body cDNA, RIKEN full-length enriched library, clone:1110020O19 product:carbonic anhydrase 3, full insert sequence [AK075630]
A_52_P318040	9.41315	Acaca	NM_133360	Mus musculus acetyl-Coenzyme A carboxylase alpha (Acaca), mRNA [NM_133360]
A_51_P503625	9.02656	Gsta3	NM_010356	Mus musculus glutathione S-transferase, alpha 3 (Gsta3), transcript variant 2, mRNA [NM_010356]
A_52_P144818	8.67403	Ppp1r1a	NM_021391	Mus musculus protein phosphatase 1, regulatory (inhibitor) subunit 1A (Ppp1r1a), mRNA [NM_021391]
A_51_P466221	8.58918	Amhr2	NM_144547	Mus musculus anti-Mullerian hormone type 2 receptor (Amhr2), mRNA [NM_144547]
A_51_P283456	8.38196	Cyp2e1	NM_021282	Mus musculus cytochrome P450, family 2, subfamily e, polypeptide 1 (Cyp2e1), mRNA [NM_021282]
A_51_P371190	7.68408	Pttg1	NM_013917	Mus musculus pituitary tumor-transforming 1 (Pttg1), mRNA [NM_013917]
A_51_P439426	7.41435	Acaca	NM_133360	Mus musculus acetyl-Coenzyme A carboxylase alpha (Acaca), mRNA [NM_133360]
A_52_P55972	7.24326	Retn	NM_022984	Mus musculus resistin (Retn), mRNA [NM_022984]
A_51_P233597	7.07618	Retn	NM_022984	Mus musculus resistin (Retn), mRNA [NM_022984]
A_52_P343381	6.72627	1810064F22Rik	NM_001033151	Mus musculus RIKEN cDNA 1810064F22 gene (1810064F22Rik), mRNA [NM_001033151]
A_52_P254817	6.46977	Retnla	NM_020509	Mus musculus resistin like alpha (Retnla), mRNA [NM_020509]
A_52_P353478	6.45542	Scn7a	NM_009135	Mus musculus sodium channel, voltage-gated, type VII, alpha (Scn7a), mRNA [NM_009135]
A_52_P647326	6.3388	Acvr1c	NM_001033369	Mus musculus activin A receptor, type IC (Acvr1c), mRNA [NM_001033369]
A_51_P179442	6.25865	Adrb3	AF193027	Mus musculus beta-3b adrenergic receptor splice variant (B3bar) mRNA, complete cds. [AF193027]
A_51_P104241	6.16864	Zfp185	NM_009549	Mus musculus zinc finger protein 185 (Zfp185), mRNA [NM_009549]
A_52_P483101	6.06606	Lpin1	NM_015763	Mus musculus lipin 1 (Lpin1), transcript variant 2, mRNA [NM_015763]
A_52_P378975	5.85673	Slc1a3	AK050752	Mus musculus 9 days embryo whole body cDNA, RIKEN full-length enriched library, clone:D030016F20 product:unclassifiable, full insert sequence [AK050752]
A_52_P432124	5.58975	Gsta3	NM_010356	Mus musculus glutathione S-transferase, alpha 3 (Gsta3), transcript variant 2, mRNA [NM_010356]
A_52_P23177	5.51453	Acaca	NM_133360	Mus musculus acetyl-Coenzyme A carboxylase alpha (Acaca), mRNA [NM_133360]
A_52_P428699	5.48648	C2	NM_013484	Mus musculus complement component 2 (within H-2S) (C2), mRNA [NM_013484]
A_52_P364021	5.39001	Mogat1	NM_026713	Mus musculus monoacylglycerol O-acyltransferase 1 (Mogat1), mRNA [NM_026713]
A_51_P257951	5.37145	Retnla	NM_020509	Mus musculus resistin like alpha (Retnla), mRNA [NM_020509]
A_51_P359432	5.32471	AK045942	AK045942	Mus musculus adult male corpora quadrigemina cDNA, RIKEN full-length enriched library, clone:B230325I23 product:hypothetical protein, full insert sequence. [AK045942]
A_51_P458451	5.25634	Adipoq	NM_009605	Mus musculus adiponectin, C1Q and collagen domain containing (Adipoq), mRNA [NM_009605]
A_52_P100252	5.24817	Fasn	NM_007988	Mus musculus fatty acid synthase (Fasn), mRNA [NM_007988]
A_51_P112151	5.22065	Mogat1	NM_026713	Mus musculus monoacylglycerol O-acyltransferase 1 (Mogat1), mRNA [NM_026713]
A_52_P356093	5.19892	B3galt2	NM_020025	Mus musculus UDP-Gal:betaGlcNAc beta 1,3-galactosyltransferase, polypeptide 2 (B3galt2), mRNA [NM_020025]
A_51_P279437	5.19313	Mfsd2	NM_029662	Mus musculus major facilitator superfamily domain containing 2 (Mfsd2), mRNA [NM_029662]
A_51_P218975	5.17667	Kcns3	NM_173417	Mus musculus potassium voltage-gated channel, delayed-rectifier, subfamily S, member 3 (Kcns3), mRNA [NM_173417]
A_51_P518051	5.14043	Dusp4	NM_176933	Mus musculus dual specificity phosphatase 4 (Dusp4), mRNA [NM_176933]
A_52_P484956	5.05857	Nnat	NM_010923	Mus musculus neuronatin (Nnat), transcript variant 1, mRNA [NM_010923]
A_52_P64383	5.00727	Klf15	NM_023184	Mus musculus Kruppel-like factor 15 (Klf15), mRNA [NM_023184]
A_52_P260754	4.96056	BC034902	AK040732	Mus musculus adult male aorta and vein cDNA, RIKEN full-length enriched library, clone:A530021K05 product:unclassifiable, full insert sequence [AK040732]
A_52_P20765	4.88974	Syt12	NM_134164	Mus musculus synaptotagmin XII (Syt12), mRNA [NM_134164]
A_51_P148221	4.87608	B3galt2	NM_020025	Mus musculus UDP-Gal:betaGlcNAc beta 1,3-galactosyltransferase, polypeptide 2 (B3galt2), mRNA [NM_020025]
A_51_P366211	4.74535	4921537D05Rik	AK141627	Mus musculus adult male hippocampus cDNA, RIKEN full-length enriched library, clone:C630047E11 product:hypothetical protein, full insert sequence. [AK141627]
A_51_P374752	4.69888	Rbp4	NM_011255	Mus musculus retinol binding protein 4, plasma (Rbp4), mRNA [NM_011255]
A_51_P305140	4.6595	Gsta1	NM_008181	Mus musculus glutathione S-transferase, alpha 1 (Ya) (Gsta1), mRNA [NM_008181]
A_52_P503663	4.65273	Gpr120	NM_181748	Mus musculus G protein-coupled receptor 120 (Gpr120), mRNA [NM_181748]
A_51_P161830	4.64149	Enpep	NM_007934	Mus musculus glutamyl aminopeptidase (Enpep), mRNA [NM_007934]
A_51_P450278	4.57286	2010003K11Rik	NM_027237	Mus musculus RIKEN cDNA 2010003K11 gene (2010003K11Rik), mRNA [NM_027237]
A_52_P182919	4.54241	Steap4	NM_054098	Mus musculus STEAP family member 4 (Steap4), mRNA [NM_054098]
A_52_P572808	4.53832	A230097K15Rik	NM_172715	Mus musculus RIKEN cDNA A230097K15 gene (A230097K15Rik), transcript variant 1, mRNA [NM_172715]
A_51_P383638	4.5342	Amy1	NM_007446	Mus musculus amylase 1, salivary (Amy1), mRNA [NM_007446]
A_51_P347333	4.51722	Dusp4	AK012530	Mus musculus 11 days embryo whole body cDNA, RIKEN full-length enriched library, clone:2700078F24 product:unclassifiable, full insert sequence [AK012530]
A_51_P268697	4.50418	Slc1a3	NM_148938	Mus musculus solute carrier family 1 (glial high affinity glutamate transporter), member 3 (Slc1a3), mRNA [NM_148938]
A_51_P383755	4.48825	1110006G14Rik	XM_001001687	PREDICTED: Mus musculus RIKEN cDNA 1110006G14 gene (1110006G14Rik), mRNA [XM_001001687]
A_51_P206153	4.47725	Ptprd	D13903	Mus musculus mRNA for MPTPdelta, complete cds. [D13903]
A_51_P375969	4.46434	Ces3	NM_053200	Mus musculus carboxylesterase 3 (Ces3), mRNA [NM_053200]
A_51_P355427	4.41344	Timp4	NM_080639	Mus musculus tissue inhibitor of metalloproteinase 4 (Timp4), mRNA [NM_080639]
A_52_P668984	4.35666	4930420K17Rik	NM_001081029	Mus musculus RIKEN cDNA 4930420K17 gene (4930420K17Rik), mRNA [NM_001081029]
A_52_P424784	4.30476	Clstn2	NM_022319	Mus musculus calsyntenin 2 (Clstn2), mRNA [NM_022319]
A_51_P217498	4.23936	Slc2a4	NM_009204	Mus musculus solute carrier family 2 (facilitated glucose transporter), member 4 (Slc2a4), mRNA [NM_009204]
A_52_P201558	4.22043	Rgs7bp	NM_029879	Mus musculus regulator of G-protein signalling 7 binding protein (Rgs7bp), mRNA [NM_029879]
A_52_P614777	4.08514	Sucnr1	NM_032400	Mus musculus succinate receptor 1 (Sucnr1), mRNA [NM_032400]
A_52_P504859	4.07696	A530020G20Rik	AK040960	Mus musculus adult male aorta and vein cDNA, RIKEN full-length enriched library, clone:A530051K04 product:unclassifiable, full insert sequence [AK040960]
A_52_P347176	4.06466	Nat8l	NM_001001985	Mus musculus N-acetyltransferase 8-like (Nat8l), mRNA [NM_001001985]
A_51_P127297	4.04569	Hsd11b1	NM_008288	Mus musculus hydroxysteroid 11-beta dehydrogenase 1 (Hsd11b1), transcript variant 1, mRNA [NM_008288]
A_52_P144368	4.03905	Odz4	NM_011858	Mus musculus odd Oz/ten-m homolog 4 (Drosophila) (Odz4), mRNA [NM_011858]
A_51_P179664	4.02819	Gstt1	NM_008185	Mus musculus glutathione S-transferase, theta 1 (Gstt1), mRNA [NM_008185]
A_52_P496726	4.02523	Rasd1	NM_009026	Mus musculus RAS, dexamethasone-induced 1 (Rasd1), mRNA [NM_009026]
A_52_P78770	4.02345	Chpt1	NM_144807	Mus musculus choline phosphotransferase 1 (Chpt1), mRNA [NM_144807]
A_52_P65719	3.99877	BC034637	BC034637	Mus musculus cDNA clone IMAGE:5365178, **** WARNING: chimeric clone ****. [BC034637]
A_51_P466633	3.99831	Slc16a7	NM_011391	Mus musculus solute carrier family 16 (monocarboxylic acid transporters), member 7 (Slc16a7), mRNA [NM_011391]
A_51_P412579	3.99585	Tmem182	AK010233	Mus musculus adult male tongue cDNA, RIKEN full-length enriched library, clone:2310079P10 product:unclassifiable, full insert sequence [AK010233]
A_51_P257613	3.98746	D2hgdh	NM_178882	Mus musculus D-2-hydroxyglutarate dehydrogenase (D2hgdh), mRNA [NM_178882]
A_51_P351844	3.97549	Bche	NM_009738	Mus musculus butyrylcholinesterase (Bche), mRNA [NM_009738]
A_52_P215176	3.97357	Opn3	NM_010098	Mus musculus opsin (encephalopsin) (Opn3), mRNA [NM_010098]
A_52_P444946	3.97256	Rprml	NM_001033212	Mus musculus reprimo-like (Rprml), mRNA [NM_001033212]
A_51_P146970	3.96305	Dmrt2	NM_145831	Mus musculus doublesex and mab-3 related transcription factor 2 (Dmrt2), mRNA [NM_145831]
A_52_P453469	3.94715	4933404M19Rik	NM_001045516	Mus musculus RIKEN cDNA 4933404M19 gene (4933404M19Rik), mRNA [NM_001045516]
A_51_P356642	3.93046	Krt19	NM_008471	Mus musculus keratin 19 (Krt19), mRNA [NM_008471]
A_51_P468231	3.88687	Ptprd	NM_011211	Mus musculus protein tyrosine phosphatase, receptor type, D (Ptprd), transcript variant b, mRNA [NM_011211]
A_51_P240857	3.87925	Chpt1	NM_144807	Mus musculus choline phosphotransferase 1 (Chpt1), mRNA [NM_144807]
A_51_P405956	3.87311	ENSMUST00000057926		cyclin L2 [Source:MarkerSymbol;Acc:MGI:1927119] [ENSMUST00000057926]
A_51_P202440	3.82566	Rarb	NM_011243	Mus musculus retinoic acid receptor, beta (Rarb), mRNA [NM_011243]
A_51_P176352	3.81395	Ndrg2	NM_013864	Mus musculus N-myc downstream regulated gene 2 (Ndrg2), mRNA [NM_013864]
A_51_P338485	3.80996	Aldh6a1	NM_134042	Mus musculus aldehyde dehydrogenase family 6, subfamily A1 (Aldh6a1), mRNA [NM_134042]
A_52_P237077	3.80449	Esr1	NM_007956	Mus musculus estrogen receptor 1 (alpha) (Esr1), mRNA [NM_007956]
A_52_P628369	3.77357	Klhdc7a	NM_173427	Mus musculus kelch domain containing 7A (Klhdc7a), mRNA [NM_173427]
A_51_P394515	3.75861	Tkt	NM_009388	Mus musculus transketolase (Tkt), mRNA [NM_009388]
A_51_P143893	3.74722	Steap4	NM_054098	Mus musculus STEAP family member 4 (Steap4), mRNA [NM_054098]
A_52_P282171	3.74192	Sox6	NM_011445	Mus musculus SRY-box containing gene 6 (Sox6), transcript variant 1, mRNA [NM_011445]
A_51_P495780	3.73174	S3-12	NM_020568	Mus musculus plasma membrane associated protein, S3-12 (S3-12), mRNA [NM_020568]
A_52_P520859	3.71432	Flt1	NM_010228	Mus musculus FMS-like tyrosine kinase 1 (Flt1), mRNA [NM_010228]
A_52_P213516	3.70436	Acvr1c	NM_001033369	Mus musculus activin A receptor, type IC (Acvr1c), mRNA [NM_001033369]
A_52_P116264	3.70226	Adhfe1	NM_175236	Mus musculus alcohol dehydrogenase, iron containing, 1 (Adhfe1), mRNA [NM_175236]
A_51_P408729	3.68708	Phgdh	NM_016966	Mus musculus 3-phosphoglycerate dehydrogenase (Phgdh), mRNA [NM_016966]
A_51_P215438	3.67898	Prodh	NM_011172	Mus musculus proline dehydrogenase (Prodh), mRNA [NM_011172]
A_52_P442691	3.64947	Mccc1	NM_023644	Mus musculus methylcrotonoyl-Coenzyme A carboxylase 1 (alpha) (Mccc1), mRNA [NM_023644]
A_51_P489452	3.64804	Cdo1	NM_033037	Mus musculus cysteine dioxygenase 1, cytosolic (Cdo1), mRNA [NM_033037]
A_52_P293482	3.64445	Lgals12	NM_019516	Mus musculus lectin, galactose binding, soluble 12 (Lgals12), mRNA [NM_019516]
A_51_P398164	3.6337	Klhl2	NM_178633	Mus musculus kelch-like 2, Mayven (Drosophila) (Klhl2), mRNA [NM_178633]
A_52_P59908	3.62856	E030031F02Rik	AK087170	Mus musculus 0 day neonate lung cDNA, RIKEN full-length enriched library, clone:E030031F02 product:unclassifiable, full insert sequence. [AK087170]
A_51_P322941	3.5992	Dok7	NM_172708	Mus musculus docking protein 7 (Dok7), mRNA [NM_172708]
A_51_P317191	3.5867	2310005P05Rik	NM_026189	Mus musculus RIKEN cDNA 2310005P05 gene (2310005P05Rik), mRNA [NM_026189]
A_51_P294059	3.57755	Gpr81	NM_175520	Mus musculus G protein-coupled receptor 81 (Gpr81), mRNA [NM_175520]
A_51_P249302	3.55972	Abcd2	NM_011994	Mus musculus ATP-binding cassette, sub-family D (ALD), member 2 (Abcd2), mRNA [NM_011994]
A_52_P59801	3.55647	Fry	AK220506	Mus musculus mRNA for mKIAA4143 protein. [AK220506]
A_51_P184991	3.53971	Wdr64	AK015753	Mus musculus adult male testis cDNA, RIKEN full-length enriched library, clone:4930511H01 product:hypothetical Trp-Asp (WD) repeats profile [AK015753]
A_52_P454815	3.53732	Fgf11	BC066859	Mus musculus fibroblast growth factor 11, mRNA (cDNA clone MGC:76712 IMAGE:30101881), complete cds. [BC066859]
A_51_P250217	3.5202	A_51_P250217
A_51_P290526	3.51045	Abcd2	NM_011994	Mus musculus ATP-binding cassette, sub-family D (ALD), member 2 (Abcd2), mRNA [NM_011994]
A_51_P384831	3.44378	Syt12	NM_134164	Mus musculus synaptotagmin XII (Syt12), mRNA [NM_134164]
A_51_P424990	3.43239	Klhdc7a	NM_173427	Mus musculus kelch domain containing 7A (Klhdc7a), mRNA [NM_173427]
A_52_P1173559	3.40595	A_52_P1173559
A_52_P281702	3.40594	Igfbp5	NM_010518	Mus musculus insulin-like growth factor binding protein 5 (Igfbp5), mRNA [NM_010518]
A_51_P455338	3.39994	Ear11	NM_053113	Mus musculus eosinophil-associated, ribonuclease A family, member 11 (Ear11), mRNA [NM_053113]
A_51_P454103	3.37109	Manba	NM_027288	Mus musculus mannosidase, beta A, lysosomal (Manba), mRNA [NM_027288]
A_52_P494514	3.33171	D630014A15Rik	AK085344	Mus musculus 0 day neonate kidney cDNA, RIKEN full-length enriched library, clone:D630014A15 product:unclassifiable, full insert sequence [AK085344]
A_51_P225427	3.3237	Pkp2	NM_026163	Mus musculus plakophilin 2 (Pkp2), mRNA [NM_026163]
A_51_P157840	3.31649	Chst1	NM_023850	Mus musculus carbohydrate (keratan sulfate Gal-6) sulfotransferase 1 (Chst1), mRNA [NM_023850]
A_52_P414065	3.30546	Mgl2	NM_145137	Mus musculus macrophage galactose N-acetyl-galactosamine specific lectin 2 (Mgl2), mRNA [NM_145137]
A_52_P661606	3.30177	Phgdh	NM_016966	Mus musculus 3-phosphoglycerate dehydrogenase (Phgdh), mRNA [NM_016966]
A_51_P360262	3.30035	Immp2l	NM_053122	Mus musculus IMP2 inner mitochondrial membrane peptidase-like (S. cerevisiae) (Immp2l), mRNA [NM_053122]
A_52_P572197	3.29838	Pank3	NM_145962	Mus musculus pantothenate kinase 3 (Pank3), mRNA [NM_145962]
A_52_P87964	3.28192	Pla2g12a	NM_183423	Mus musculus phospholipase A2, group XIIA (Pla2g12a), transcript variant 2, mRNA [NM_183423]
A_51_P435366	3.27405	Lipe	NM_010719	Mus musculus lipase, hormone sensitive (Lipe), transcript variant 1, mRNA [NM_010719]
A_51_P327874	3.26907	Pthr1	NM_011199	Mus musculus parathyroid hormone receptor 1 (Pthr1), transcript variant 1, mRNA [NM_011199]
A_52_P541760	3.26067	A_52_P541760
A_52_P160279	3.24779	4631427C17Rik	NM_021414	Mus musculus RIKEN cDNA 4631427C17 gene (4631427C17Rik), mRNA [NM_021414]
A_51_P145631	3.24263	6620401M08Rik	AK158571	Mus musculus visual cortex cDNA, RIKEN full-length enriched library, clone:K230015A11 product:hypothetical Arginine-rich region profile containing protein, full insert sequence. [AK158571]
A_51_P517182	3.24184	Hrasls3	AK052657	Mus musculus 0 day neonate kidney cDNA, RIKEN full-length enriched library, clone:D630015C01 product:H-REV 107 PROTEIN homolog [Rattus norvegicus], full insert sequence. [AK052657]
A_52_P118706	3.23715	9630013D21Rik	AK080944	Mus musculus 4 days neonate male adipose cDNA, RIKEN full-length enriched library, clone:B430215G09 product:unclassifiable, full insert sequence [AK080944]
A_51_P244655	3.23636	Rsbn1	NM_172684	Mus musculus rosbin, round spermatid basic protein 1 (Rsbn1), mRNA [NM_172684]
A_51_P111655	3.23048	A930034L06Rik	NM_175692	Mus musculus RIKEN cDNA A930034L06 gene (A930034L06Rik), mRNA [NM_175692]
A_51_P508580	3.21363	Tcf15	NM_009328	Mus musculus transcription factor 15 (Tcf15), mRNA [NM_009328]
A_52_P423188	3.21284	Mlxipl	AF245475	Mus musculus Mlx interactor zeta (Mio) mRNA, complete cds, alternatively spliced [AF245475]
A_52_P508991	3.21128	Fmo1	NM_010231	Mus musculus flavin containing monooxygenase 1 (Fmo1), mRNA [NM_010231]
A_52_P155849	3.20866	Arl4a	NM_007487	Mus musculus ADP-ribosylation factor-like 4A (Arl4a), transcript variant 1, mRNA [NM_007487]
A_51_P428555	3.20727	Adh1	NM_007409	Mus musculus alcohol dehydrogenase 1 (class I) (Adh1), mRNA [NM_007409]
A_51_P141546	3.19695	Orm2	NM_011016	Mus musculus orosomucoid 2 (Orm2), mRNA [NM_011016]
A_51_P517145	3.1948	Sort1	NM_019972	Mus musculus sortilin 1 (Sort1), mRNA [NM_019972]
A_51_P408732	3.18866	Phgdh	NM_016966	Mus musculus 3-phosphoglycerate dehydrogenase (Phgdh), mRNA [NM_016966]
A_52_P76355	3.18367	2210408I21Rik	AK164185	Mus musculus adult male hippocampus cDNA, RIKEN full-length enriched library, clone:C630040B20 product:hypothetical protein, full insert sequence. [AK164185]
A_52_P409570	3.15828	Pdzd2	NM_001081064	Mus musculus PDZ domain containing 2 (Pdzd2), mRNA [NM_001081064]
A_51_P425824	3.13368	C1qdc2	NM_026125	Mus musculus C1q domain containing 2 (C1qdc2), mRNA [NM_026125]
A_52_P326664	3.11791	Unc93a	NM_199252	Mus musculus unc-93 homolog A (C. elegans) (Unc93a), mRNA [NM_199252]
A_51_P200339	3.11498	Cachd1	NM_198037	Mus musculus cache domain containing 1 (Cachd1), mRNA [NM_198037]
A_51_P418526	3.11314	Sfxn1	NM_027324	Mus musculus sideroflexin 1 (Sfxn1), mRNA [NM_027324]
A_51_P497270	3.09028	Mycs	NM_010850	Mus musculus myc-like oncogene, s-myc protein (Mycs), mRNA [NM_010850]
A_51_P513311	3.08762	Rxrg	NM_009107	Mus musculus retinoid X receptor gamma (Rxrg), mRNA [NM_009107]
A_52_P137778	3.08575	A530053G22Rik	BC051224	Mus musculus RIKEN cDNA A530053G22 gene, mRNA (cDNA clone MGC:63091 IMAGE:3373233), complete cds. [BC051224]
A_52_P239536	3.08248	Ppp1r9a	NM_181595	Mus musculus protein phosphatase 1, regulatory (inhibitor) subunit 9A (Ppp1r9a), mRNA [NM_181595]
A_52_P499948	3.07378	1700023L04Rik	XM_485737	PREDICTED: Mus musculus RIKEN cDNA 1700023L04 gene (1700023L04Rik), mRNA [XM_485737]
A_52_P359739	3.07141	Dgat2	NM_026384	Mus musculus diacylglycerol O-acyltransferase 2 (Dgat2), mRNA [NM_026384]
A_52_P616229	3.06607	3110057O12Rik	NM_026622	Mus musculus RIKEN cDNA 3110057O12 gene (3110057O12Rik), mRNA [NM_026622]
A_51_P415555	3.06538	Amy2	NM_009669	Mus musculus amylase 2, pancreatic (Amy2), mRNA [NM_009669]
A_51_P292008	3.06368	Gpx3	NM_008161	Mus musculus glutathione peroxidase 3 (Gpx3), transcript variant 2, mRNA [NM_008161]
A_51_P224311	3.05449	Popdc2	NM_022318	Mus musculus popeye domain containing 2 (Popdc2), transcript variant 2, mRNA [NM_022318]
A_51_P358423	3.04737	Usp53	BC022221	Mus musculus ubiquitin specific peptidase 53, mRNA (cDNA clone IMAGE:4236151), partial cds [BC022221]
A_52_P278538	3.03805	Hba-a1	NM_008218	Mus musculus hemoglobin alpha, adult chain 1 (Hba-a1), mRNA [NM_008218]
A_52_P165705	3.03502	Cd1d2	NM_007640	Mus musculus CD1d2 antigen (Cd1d2), mRNA [NM_007640]
A_52_P460422	3.02602	Hspa12a	NM_175199	Mus musculus heat shock protein 12A (Hspa12a), mRNA [NM_175199]
A_52_P413584	3.02221	Nrip1	BC062260	Mus musculus nuclear receptor interacting protein 1, mRNA (cDNA clone IMAGE:820587). [BC062260]
A_51_P309184	3.01654	Pxmp2	NM_008993	Mus musculus peroxisomal membrane protein 2 (Pxmp2), mRNA [NM_008993]
A_51_P298991	3.01578	OTTMUSG00000001284	AK036131	Mus musculus 16 days neonate cerebellum cDNA, RIKEN full-length enriched library, clone:9630038C08 product:unclassifiable, full insert sequence. [AK036131]
A_51_P354934	3.01137	Rgs5	AK028765	Mus musculus 10 days neonate skin cDNA, RIKEN full-length enriched library, clone:4732454I17 product:regulator of G-protein signaling 5, full insert sequence [AK028765]
A_51_P159803	3.00509	Nrg4	NM_032002	Mus musculus neuregulin 4 (Nrg4), mRNA [NM_032002]
A_51_P384936	2.99893	Ddo	NM_027442	Mus musculus D-aspartate oxidase (Ddo), mRNA [NM_027442]
A_51_P132530	2.98363	Cldn22	AK008821	Mus musculus adult male stomach cDNA, RIKEN full-length enriched library, clone:2210404A22 product:hypothetical PMP-22/EMP/MP20 and claudin family containing protein, full insert sequence. [AK008821]
A_51_P244497	2.98294	Plin	NM_175640	Mus musculus perilipin (Plin), mRNA [NM_175640]
A_51_P436567	2.97571	BC015286	NM_198171	Mus musculus cDNA sequence BC015286 (BC015286), mRNA [NM_198171]
A_51_P268439	2.96573	Mcam	NM_023061	Mus musculus melanoma cell adhesion molecule (Mcam), mRNA [NM_023061]
A_51_P336325	2.96463	Orm1	NM_008768	Mus musculus orosomucoid 1 (Orm1), mRNA [NM_008768]
A_52_P86704	2.96156	Arl4a	NM_007487	Mus musculus ADP-ribosylation factor-like 4A (Arl4a), transcript variant 1, mRNA [NM_007487]
A_52_P70888	2.95658	A930034L06Rik	NM_175692	Mus musculus RIKEN cDNA A930034L06 gene (A930034L06Rik), mRNA [NM_175692]
A_51_P363338	2.95144	Prkcm	NM_008858	Mus musculus protein kinase C, mu (Prkcm), mRNA [NM_008858]
A_51_P159453	2.94813	Serpina3n	NM_009252	Mus musculus serine (or cysteine) peptidase inhibitor, clade A, member 3N (Serpina3n), mRNA [NM_009252]
A_51_P401921	2.94614	Srebf1	NM_011480	Mus musculus sterol regulatory element binding factor 1 (Srebf1), mRNA [NM_011480]
A_52_P113085	2.93609	Pdzd2	AK021207	Mus musculus ES cells cDNA, RIKEN full-length enriched library, clone:C330017M16 product:unclassifiable, full insert sequence. [AK021207]
A_52_P605266	2.93569	Ptprd	NM_001014288	Mus musculus protein tyrosine phosphatase, receptor type, D (Ptprd), transcript variant a, mRNA [NM_001014288]
A_51_P240986	2.934	Plekhg6	NM_198604	Mus musculus pleckstrin homology domain containing, family G (with RhoGef domain) member 6 (Plekhg6), mRNA [NM_198604]
A_52_P518808	2.93333	LOC676546	XM_990990	PREDICTED: Mus musculus similar to monocyte to macrophage differentiation-associated (LOC676546), mRNA [XM_990990]
A_51_P385351	2.93084	Slc44a3	NM_145394	Mus musculus solute carrier family 44, member 3 (Slc44a3), mRNA [NM_145394]
A_52_P586391	2.92981	NAP056404-1
A_52_P629487	2.92424	Selenbp1	NM_009150	Mus musculus selenium binding protein 1 (Selenbp1), mRNA [NM_009150]
A_52_P376574	2.92122	Pcsk6	XM_355911	PREDICTED: Mus musculus proprotein convertase subtilisin [XM_355911]
A_51_P493649	2.91556	Sult1e1	NM_023135	Mus musculus sulfotransferase family 1E, member 1 (Sult1e1), mRNA [NM_023135]
A_51_P435363	2.9131	Lipe	NM_010719	Mus musculus lipase, hormone sensitive (Lipe), transcript variant 1, mRNA [NM_010719]
A_51_P231308	2.91105	Mfng	NM_008595	Mus musculus manic fringe homolog (Drosophila) (Mfng), mRNA [NM_008595]
A_51_P212038	2.90401	Atp6v0e2	NM_133764	Mus musculus ATPase, H+ transporting, lysosomal V0 subunit E2 (Atp6v0e2), mRNA [NM_133764]
A_51_P179103	2.89728	Tshr	NM_011648	Mus musculus thyroid stimulating hormone receptor (Tshr), mRNA [NM_011648]
A_52_P458177	2.8869	Ubie	AB099518	Mus musculus UbiE2 mRNA for UbiE2, complete cds. [AB099518]
A_51_P240036	2.88155	Serpina3k	NM_011458	Mus musculus serine (or cysteine) peptidase inhibitor, clade A, member 3K (Serpina3k), mRNA [NM_011458]
A_51_P474169	2.87456	5430407P10Rik	NM_144883	Mus musculus RIKEN cDNA 5430407P10 gene (5430407P10Rik), mRNA [NM_144883]
A_52_P175028	2.8732	Cachd1	XM_991907	PREDICTED: Mus musculus cache domain containing 1, transcript variant 3 (Cachd1), mRNA [XM_991907]
A_52_P537711	2.86556	NAP029158-1
A_51_P207550	2.85622	Pla2g12a	NM_023196	Mus musculus phospholipase A2, group XIIA (Pla2g12a), transcript variant 1, mRNA [NM_023196]
A_51_P252545	2.85431	Ppm1m	NM_026447	Mus musculus protein phosphatase 1M (Ppm1m), transcript variant 1, mRNA [NM_026447]
A_51_P165882	2.85415	Slc22a18	NM_008767	Mus musculus solute carrier family 22 (organic cation transporter), member 18 (Slc22a18), transcript variant 1, mRNA [NM_008767]
A_51_P378051	2.84904	Aoc3	NM_009675	Mus musculus amine oxidase, copper containing 3 (Aoc3), mRNA [NM_009675]
A_51_P220062	2.83318	Mmp15	NM_008609	Mus musculus matrix metallopeptidase 15 (Mmp15), mRNA [NM_008609]
A_52_P113700	2.82826	Sfxn1	NM_027324	Mus musculus sideroflexin 1 (Sfxn1), mRNA [NM_027324]
A_51_P322640	2.81851	Ccl24	NM_019577	Mus musculus chemokine (C-C motif) ligand 24 (Ccl24), mRNA [NM_019577]
A_51_P498267	2.81083	Ankrd29		ankyrin repeat domain 29 [Source:MarkerSymbol;Acc:MGI:2687055] [ENSMUST00000080906]
A_52_P65305	2.80117	Lrrc39	NM_027321	Mus musculus leucine rich repeat containing 39 (Lrrc39), transcript variant 1, mRNA [NM_027321]
A_51_P383524	2.80064	Art3	NM_181728	Mus musculus ADP-ribosyltransferase 3 (Art3), mRNA [NM_181728]
A_51_P207591	2.79913	Anxa8	NM_013473	Mus musculus annexin A8 (Anxa8), mRNA [NM_013473]
A_51_P209261	2.79422	Sqrdl	NM_021507	Mus musculus sulfide quinone reductase-like (yeast) (Sqrdl), mRNA [NM_021507]
A_51_P399477	2.78687	D030011O10Rik	NM_177192	Mus musculus RIKEN cDNA D030011O10 gene (D030011O10Rik), mRNA [NM_177192]
A_52_P420734	2.78473	Rasgrp2	BC051474	Mus musculus RAS, guanyl releasing protein 2, mRNA (cDNA clone IMAGE:1179744), complete cds. [BC051474]
A_51_P234407	2.78426	Tjp3	NM_013769	Mus musculus tight junction protein 3 (Tjp3), mRNA [NM_013769]
A_51_P106799	2.77598	Pparg	NM_011146	Mus musculus peroxisome proliferator activated receptor gamma (Pparg), mRNA [NM_011146]
A_51_P374707	2.77074	Tspan12	NM_173007	Mus musculus tetraspanin 12 (Tspan12), mRNA [NM_173007]
A_51_P173735	2.76922	Dock11	NM_001009947	Mus musculus dedicator of cytokinesis 11 (Dock11), mRNA [NM_001009947]
A_52_P254095	2.76683	Cd200	NM_010818	Mus musculus Cd200 antigen (Cd200), mRNA [NM_010818]
A_52_P532227	2.7589	Edg1	NM_007901	Mus musculus endothelial differentiation sphingolipid G-protein-coupled receptor 1 (Edg1), mRNA [NM_007901]
A_52_P533809	2.75474	Id1	NM_010495	Mus musculus inhibitor of DNA binding 1 (Id1), mRNA [NM_010495]
A_52_P485573	2.74927	Tef	NM_153484	Mus musculus thyrotroph embryonic factor (Tef), transcript variant 2, mRNA [NM_153484]
A_51_P423456	2.73185	Sort1	NM_019972	Mus musculus sortilin 1 (Sort1), mRNA [NM_019972]
A_51_P386503	2.72782	1300007F04Rik	NM_026185	Mus musculus RIKEN cDNA 1300007F04 gene (1300007F04Rik), mRNA [NM_026185]
A_51_P135012	2.72226	Rhpn2	NM_027897	Mus musculus rhophilin, Rho GTPase binding protein 2 (Rhpn2), mRNA [NM_027897]
A_51_P385114	2.71498	A930034L06Rik	NM_175692	Mus musculus RIKEN cDNA A930034L06 gene (A930034L06Rik), mRNA [NM_175692]
A_51_P212030	2.71417	Atp6v0e2	NM_133764	Mus musculus ATPase, H+ transporting, lysosomal V0 subunit E2 (Atp6v0e2), mRNA [NM_133764]
A_51_P302566	2.70981	Maob	NM_172778	Mus musculus monoamine oxidase B (Maob), mRNA [NM_172778]
A_51_P471819	2.70865	M77003	M77003	Mouse glycerol-3-phosphate acyltransferase mRNA, complete cds. [M77003]
A_51_P463765	2.70287	Timp3	NM_011595	Mus musculus tissue inhibitor of metalloproteinase 3 (Timp3), mRNA [NM_011595]
AT_ssM_PC_3	2.70279	AT_ssM_PC_3
A_52_P286166	2.70141	Penk1	NM_001002927	Mus musculus preproenkephalin 1 (Penk1), mRNA [NM_001002927]
A_51_P503654	2.69452	BC010787	NM_178577	Mus musculus cDNA sequence BC010787 (BC010787), mRNA [NM_178577]
A_52_P115787	2.6881	Grb10	NM_010345	Mus musculus growth factor receptor bound protein 10 (Grb10), mRNA [NM_010345]
A_51_P461665	2.6845	Cxcl9	NM_008599	Mus musculus chemokine (C-X-C motif) ligand 9 (Cxcl9), mRNA [NM_008599]
A_51_P147056	2.68377	BF138649	BF138649	601781827F1 NCI_CGAP_Lu30 Mus musculus cDNA clone IMAGE:4009735 5'. [BF138649]
A_51_P424878	2.68147	2810405K02Rik	NM_025582	Mus musculus RIKEN cDNA 2810405K02 gene (2810405K02Rik), mRNA [NM_025582]
A_51_P504546	2.68086	Aldh1l1	NM_027406	Mus musculus aldehyde dehydrogenase 1 family, member L1 (Aldh1l1), mRNA [NM_027406]
A_51_P256246	2.68016	Tspan13	NM_025359	Mus musculus tetraspanin 13 (Tspan13), mRNA [NM_025359]
A_52_P307922	2.67981	Flt1	BC029674	Mus musculus FMS-like tyrosine kinase 1, mRNA (cDNA clone MGC:36074 IMAGE:5368921), complete cds. [BC029674]
A_51_P490456	2.67652	Cidec	NM_178373	Mus musculus cell death-inducing DFFA-like effector c (Cidec), mRNA [NM_178373]
A_51_P102987	2.66468	Penk1	NM_001002927	Mus musculus preproenkephalin 1 (Penk1), mRNA [NM_001002927]
A_51_P516012	2.66385	Ntrk2	NM_008745	Mus musculus neurotrophic tyrosine kinase, receptor, type 2 (Ntrk2), transcript variant 2, mRNA [NM_008745]
A_52_P147816	2.66171	Morc4	NM_029413	Mus musculus microrchidia 4 (Morc4), mRNA [NM_029413]
A_51_P464387	2.66043	Hspb8	NM_030704	Mus musculus heat shock protein 8 (Hspb8), mRNA [NM_030704]
A_52_P389484	2.65664	Pag1	AK041695	Mus musculus 3 days neonate thymus cDNA, RIKEN full-length enriched library, clone:A630030J17 product:unclassifiable, full insert sequence. [AK041695]
A_51_P114591	2.65524	1110005A03Rik	NM_028865	Mus musculus RIKEN cDNA 1110005A03 gene (1110005A03Rik), mRNA [NM_028865]
A_51_P174275	2.65065	Colec11	NM_027866	Mus musculus collectin sub-family member 11 (Colec11), mRNA [NM_027866]
A_52_P283802	2.64962	Tapt1	NM_173764	Mus musculus transmembrane anterior posterior transformation 1 (Tapt1), mRNA [NM_173764]
A_51_P172475	2.64789	S100a1	NM_011309	Mus musculus S100 calcium binding protein A1 (S100a1), mRNA [NM_011309]
A_51_P158638	2.64197	ENSMUST00000025033		RIKEN cDNA 0610031G08 gene [Source:MarkerSymbol;Acc:MGI:1922643] [ENSMUST00000025033]
A_52_P229471	2.64124	TC1632790
A_51_P212491	2.64014	Pfkfb3	NM_133232	Mus musculus 6-phosphofructo-2-kinase/fructose-2,6-biphosphatase 3 (Pfkfb3), mRNA [NM_133232]
A_51_P508899	2.6384	Rbp7	NM_022020	Mus musculus retinol binding protein 7, cellular (Rbp7), mRNA [NM_022020]
A_52_P15073	2.63558	4833442J19Rik	NM_177101	Mus musculus RIKEN cDNA 4833442J19 gene (4833442J19Rik), mRNA [NM_177101]
A_51_P241407	2.63413	BU557601	BU557601	AGENCOURT_10187243 NIH_MGC_144 Mus musculus cDNA clone IMAGE:6585538 5', mRNA sequence [BU557601]
A_51_P272283	2.62525	Cmbl	NM_181588	Mus musculus carboxymethylenebutenolidase-like (Pseudomonas) (Cmbl), mRNA [NM_181588]
A_51_P203720	2.62496	D10Bwg1379e	NM_001033258	Mus musculus DNA segment, Chr 10, Brigham & Women's Genetics 1379 expressed (D10Bwg1379e), mRNA [NM_001033258]
A_51_P151862	2.62407	Lims2	NM_144862	Mus musculus LIM and senescent cell antigen like domains 2 (Lims2), mRNA [NM_144862]
A_52_P460767	2.61179	Fmo5	NM_010232	Mus musculus flavin containing monooxygenase 5 (Fmo5), mRNA [NM_010232]
A_51_P453475	2.60695	Slc1a5	NM_009201	Mus musculus solute carrier family 1 (neutral amino acid transporter), member 5 (Slc1a5), mRNA [NM_009201]
A_52_P136782	2.60612	Rgs5	NM_009063	Mus musculus regulator of G-protein signaling 5 (Rgs5), mRNA [NM_009063]
A_52_P513041	2.60139	Fry	AK220506	Mus musculus mRNA for mKIAA4143 protein. [AK220506]
A_51_P181833	2.59734	Akap9	NM_194462	Mus musculus A kinase (PRKA) anchor protein (yotiao) 9 (Akap9), mRNA [NM_194462]
A_51_P155052	2.59219	Xlkd1	NM_053247	Mus musculus extra cellular link domain-containing 1 (Xlkd1), mRNA [NM_053247]
A_52_P499879	2.5905	Gstz1	NM_010363	Mus musculus glutathione transferase zeta 1 (maleylacetoacetate isomerase) (Gstz1), mRNA [NM_010363]
A_51_P261718	2.58895	Acly	NM_134037	Mus musculus ATP citrate lyase (Acly), mRNA [NM_134037]
A_51_P268234	2.58622	2010004A03Rik	NM_029646	Mus musculus RIKEN cDNA 2010004A03 gene (2010004A03Rik), mRNA [NM_029646]
A_51_P374476	2.58571	Hbb-b1	NM_008220	Mus musculus hemoglobin, beta adult major chain (Hbb-b1), mRNA [NM_008220]
A_52_P569348	2.58171	Dbt	NM_010022	Mus musculus dihydrolipoamide branched chain transacylase E2 (Dbt), mRNA [NM_010022]
A_51_P489633	2.5816	Epb4.9	NM_013514	Mus musculus erythrocyte protein band 4.9 (Epb4.9), mRNA [NM_013514]
A_51_P180905	2.5787	Pcsk6	XM_355911	PREDICTED: Mus musculus proprotein convertase subtilisin [XM_355911]
A_52_P163515	2.57808	LOC545714	XR_004420	PREDICTED: Mus musculus similar to protein phosphatase 2, regulatory subunit B (B56), alpha isoform (LOC545714), mRNA [XR_004420]
A_51_P397537	2.57719	1700012H05Rik	NM_029660	Mus musculus RIKEN cDNA 1700012H05 gene (1700012H05Rik), mRNA [NM_029660]
A_52_P672338	2.57614	Spnb1	NM_013675	Mus musculus spectrin beta 1 (Spnb1), mRNA [NM_013675]
A_52_P43326	2.57252	Rgs4	NM_009062	Mus musculus regulator of G-protein signaling 4 (Rgs4), mRNA [NM_009062]
A_52_P38117	2.57181	A530016L24Rik	NM_177039	Mus musculus RIKEN cDNA A530016L24 gene (A530016L24Rik), mRNA [NM_177039]
A_52_P907389	2.56902	ENSMUSG00000053880	AK042682	Mus musculus 7 days neonate cerebellum cDNA, RIKEN full-length enriched library, clone:A730015C16 product:hypothetical protein, full insert sequence. [AK042682]
A_52_P662796	2.56097	Dennd2d	NM_028110	Mus musculus DENN/MADD domain containing 2D (Dennd2d), mRNA [NM_028110]
A_52_P532559	2.55931	Thrb	AK158826	Mus musculus visual cortex cDNA, RIKEN full-length enriched library, clone:K430339A03 product:thyroid hormone receptor beta, full insert sequence. [AK158826]
A_51_P301483	2.55783	Hoxc8	NM_010466	Mus musculus homeo box C8 (Hoxc8), mRNA [NM_010466]
A_51_P273684	2.55489	Gbe1	NM_028803	Mus musculus glucan (1,4-alpha-), branching enzyme 1 (Gbe1), mRNA [NM_028803]
A_52_P541118	2.55445	A930034L06Rik	NM_175692	Mus musculus RIKEN cDNA A930034L06 gene (A930034L06Rik), mRNA [NM_175692]
A_51_P389905	2.55195	Ulk2	NM_013881	Mus musculus Unc-51 like kinase 2 (C. elegans) (Ulk2), mRNA [NM_013881]
A_52_P920129	2.55103	Gnai1	NM_010305	Mus musculus guanine nucleotide binding protein, alpha inhibiting 1 (Gnai1), mRNA [NM_010305]
A_52_P427640	2.54979	EG667984	XR_002113	PREDICTED: Mus musculus similar to serine (or cysteine) peptidase inhibitor, clade A, member 3B (LOC667984), mRNA [XR_002113]
A_52_P221067	2.54713	EG238395	XM_138240	PREDICTED: Mus musculus similar to serine (or cysteine) peptidase inhibitor, clade A, member 3B (LOC238395), mRNA [XM_138240]
A_52_P517063	2.5455	Immp2l	NM_053122	Mus musculus IMP2 inner mitochondrial membrane peptidase-like (S. cerevisiae) (Immp2l), mRNA [NM_053122]
A_51_P299339	2.54218	Klf15	NM_023184	Mus musculus Kruppel-like factor 15 (Klf15), mRNA [NM_023184]
A_51_P173601	2.53942	Bcam	NM_020486	Mus musculus basal cell adhesion molecule (Bcam), mRNA [NM_020486]
A_52_P235616	2.53769	4933413J09Rik	AK016807	Mus musculus adult male testis cDNA, RIKEN full-length enriched library, clone:4933413J09 product:4933413J09RIK PROTEIN, full insert sequence. [AK016807]
A_51_P175232	2.53403	Fbxl4	NM_172988	Mus musculus F-box and leucine-rich repeat protein 4 (Fbxl4), mRNA [NM_172988]
A_51_P246924	2.53397	2700055K07Rik	NM_026481	Mus musculus RIKEN cDNA 2700055K07 gene (2700055K07Rik), mRNA [NM_026481]
A_52_P317393	2.52806	Gpr56	NM_018882	Mus musculus G protein-coupled receptor 56 (Gpr56), mRNA [NM_018882]
A_51_P290399	2.5278	AI661453	NM_145489	Mus musculus expressed sequence AI661453 (AI661453), mRNA [NM_145489]
A_51_P291417	2.52527	Thbd	NM_009378	Mus musculus thrombomodulin (Thbd), mRNA [NM_009378]
A_52_P94150	2.52465	AK015074	AK015074	Mus musculus adult male testis cDNA, RIKEN full-length enriched library, clone:4930404C15 product:3-phosphoglycerate dehydrogenase, full insert sequence. [AK015074]
A_52_P359088	2.52403	Slc25a25	NM_146118	Mus musculus solute carrier family 25 (mitochondrial carrier, phosphate carrier), member 25 (Slc25a25), mRNA [NM_146118]
A_51_P279232	2.52368	Dennd2d	NM_028110	Mus musculus DENN/MADD domain containing 2D (Dennd2d), mRNA [NM_028110]
A_51_P506899	2.52109	Hspa12a	NM_175199	Mus musculus heat shock protein 12A (Hspa12a), mRNA [NM_175199]
A_51_P211880	2.51973	Mccc2	NM_030026	Mus musculus methylcrotonoyl-Coenzyme A carboxylase 2 (beta) (Mccc2), mRNA [NM_030026]
A_52_P821	2.51957	Fli1	NM_008026	Mus musculus Friend leukemia integration 1 (Fli1), mRNA [NM_008026]
A_51_P146560	2.51526	Msln	NM_018857	Mus musculus mesothelin (Msln), mRNA [NM_018857]
A_52_P415996	2.51526	Gstm6	NM_008184	Mus musculus glutathione S-transferase, mu 6 (Gstm6), mRNA [NM_008184]
A_52_P278354	2.50985	Bmp7	NM_007557	Mus musculus bone morphogenetic protein 7 (Bmp7), mRNA [NM_007557]
A_51_P226269	2.49888	1190002H23Rik	NM_025427	Mus musculus RIKEN cDNA 1190002H23 gene (1190002H23Rik), mRNA [NM_025427]
A_51_P435911	2.49789	Hsd3b7	NM_133943	Mus musculus hydroxy-delta-5-steroid dehydrogenase, 3 beta- and steroid delta-isomerase 7 (Hsd3b7), transcript variant 1, mRNA [NM_133943]
A_51_P310967	2.49756	Aifm2	NM_153779	Mus musculus apoptosis-inducing factor, mitochondrion-associated 2 (Aifm2), transcript variant 1, mRNA [NM_153779]
A_51_P297647	2.4962	Sh3glb2	NM_139302	Mus musculus SH3-domain GRB2-like endophilin B2 (Sh3glb2), mRNA [NM_139302]
A_51_P250001	2.49536	H1fnt	NM_027304	Mus musculus H1 histone family, member N, testis-specific (H1fnt), mRNA [NM_027304]
A_51_P242399	2.49442	Krt8	NM_031170	Mus musculus keratin 8 (Krt8), mRNA [NM_031170]
A_52_P52156	2.48996	Isoc2a	XM_973921	PREDICTED: Mus musculus similar to isochorismatase domain containing 2 (LOC664994), mRNA [XM_973921]
A_52_P260346	2.48344	Hbb-b1	NM_008220	Mus musculus hemoglobin, beta adult major chain (Hbb-b1), mRNA [NM_008220]
A_51_P346874	2.48174	1700112E06Rik	AK007175	Mus musculus adult male testis cDNA, RIKEN full-length enriched library, clone:1700112E06 product:hypothetical Leucine-rich repeat/Immunoglobulin/major histocompatibility complex containing protein, full insert sequence. [AK007175]
A_52_P638732	2.48009	Dock11	NM_001009947	Mus musculus dedicator of cytokinesis 11 (Dock11), mRNA [NM_001009947]
A_52_P995597	2.47912	Syne2	NM_001005510	Mus musculus synaptic nuclear envelope 2 (Syne2), mRNA [NM_001005510]
A_51_P476018	2.47841	Sox7	NM_011446	Mus musculus SRY-box containing gene 7 (Sox7), mRNA [NM_011446]
A_52_P568257	2.47563	Sort1	NM_019972	Mus musculus sortilin 1 (Sort1), mRNA [NM_019972]
A_52_P376135	2.47379	Mknk2	NM_021462	Mus musculus MAP kinase-interacting serine/threonine kinase 2 (Mknk2), mRNA [NM_021462]
A_52_P590396	2.47229	Sort1	NM_019972	Mus musculus sortilin 1 (Sort1), mRNA [NM_019972]
A_52_P543079	2.4635	Dhtkd1	NM_001081131	Mus musculus dehydrogenase E1 and transketolase domain containing 1 (Dhtkd1), mRNA [NM_001081131]
A_51_P443403	2.46169	Smoc1	NM_022316	Mus musculus SPARC related modular calcium binding 1 (Smoc1), mRNA [NM_022316]
A_51_P133105	2.46065	8430416G17Rik	AK018420	Mus musculus 16 days embryo lung cDNA, RIKEN full-length enriched library, clone:8430416G17 product:unclassifiable, full insert sequence. [AK018420]
A_51_P475613	2.45678	Fahd2a	NM_029629	Mus musculus fumarylacetoacetate hydrolase domain containing 2A (Fahd2a), mRNA [NM_029629]
A_52_P429723	2.45334	Mme	NM_008604	Mus musculus membrane metallo endopeptidase (Mme), mRNA [NM_008604]
A_51_P284665	2.4414	Plcb1	NM_019677	Mus musculus phospholipase C, beta 1 (Plcb1), mRNA [NM_019677]
A_52_P629895	2.43904	Adh1	NM_007409	Mus musculus alcohol dehydrogenase 1 (class I) (Adh1), mRNA [NM_007409]
A_51_P418259	2.43626	Pccb	NM_025835	Mus musculus propionyl Coenzyme A carboxylase, beta polypeptide (Pccb), mRNA [NM_025835]
A_51_P356822	2.43515	Vps13c	AK048766	Mus musculus 0 day neonate cerebellum cDNA, RIKEN full-length enriched library, clone:C230055H22 product:hypothetical Lysine-rich region containing protein, full insert sequence. [AK048766]
A_52_P572368	2.42609	1300015D01Rik	AK005014	Mus musculus adult male liver cDNA, RIKEN full-length enriched library, clone:1300015D01 product:unclassifiable, full insert sequence [AK005014]
A_52_P550069	2.42599	Ivd	NM_019826	Mus musculus isovaleryl coenzyme A dehydrogenase (Ivd), mRNA [NM_019826]
A_51_P333349	2.42592	2010310D06Rik	NM_172541	Mus musculus RIKEN cDNA 2010310D06 gene (2010310D06Rik), mRNA [NM_172541]
A_52_P606134	2.42273	TC1617558		2A5A_MOUSE (Q6PD03) Serine/threonine-protein phosphatase 2A 56 kDa regulatory subunit alpha isoform (PP2A, B subunit, B' alpha isoform) (PP2A, B subunit, B56 alpha isoform) (PP2A, B subunit, PR61 alpha isoform) (PP2A, B subunit, R5 alpha isoform)...
A_52_P322181	2.41222	Adrb1	CK020710	AGENCOURT_16521866 NIH_MGC_222 Mus musculus cDNA clone IMAGE:30713994 5', mRNA sequence [CK020710]
A_51_P268193	2.41203	Slc7a10	NM_017394	Mus musculus solute carrier family 7 (cationic amino acid transporter, y+ system), member 10 (Slc7a10), mRNA [NM_017394]
A_51_P191274	2.41088	A_51_P191274
A_51_P431996	2.40551	Zfp367	NM_175494	Mus musculus zinc finger protein 367 (Zfp367), mRNA [NM_175494]
A_51_P110672	2.40399	Mst1r	NM_009074	Mus musculus macrophage stimulating 1 receptor (c-met-related tyrosine kinase) (Mst1r), mRNA [NM_009074]
A_51_P278887	2.40055	Hint2	NM_026871	Mus musculus histidine triad nucleotide binding protein 2 (Hint2), mRNA [NM_026871]
A_52_P595124	2.40008	Acaca	NM_133360	Mus musculus acetyl-Coenzyme A carboxylase alpha (Acaca), mRNA [NM_133360]
A_52_P216311	2.39097	Mllt4	NM_010806	Mus musculus myeloid/lymphoid or mixed lineage-leukemia translocation to 4 homolog (Drosophila) (Mllt4), mRNA [NM_010806]
A_51_P245368	2.38636	Abcb1b	NM_011075	Mus musculus ATP-binding cassette, sub-family B (MDR/TAP), member 1B (Abcb1b), mRNA [NM_011075]
A_51_P302823	2.38455	Cib2	NM_019686	Mus musculus calcium and integrin binding family member 2 (Cib2), mRNA [NM_019686]
A_52_P478420	2.37858	Cyp2d22	AK086555	Mus musculus 15 days embryo head cDNA, RIKEN full-length enriched library, clone:D930036L18 product:cytochrome P450, family 2, subfamily d, polypeptide 22, full insert sequence. [AK086555]
A_51_P292097	2.37657	Ubc	AK010964	Mus musculus 13 days embryo liver cDNA, RIKEN full-length enriched library, clone:2510015A11 product:POLYUBIQUITIN (UBIQUITIN B) homolog [Mus musculus], full insert sequence. [AK010964]
A_51_P185259	2.37235	Gnb5	NM_010313	Mus musculus guanine nucleotide binding protein, beta 5 (Gnb5), transcript variant 1, mRNA [NM_010313]
A_52_P686231	2.37173	A530020G20Rik	AK040960	Mus musculus adult male aorta and vein cDNA, RIKEN full-length enriched library, clone:A530051K04 product:unclassifiable, full insert sequence [AK040960]
A_52_P256757	2.36672	Rhbdl1	NM_144816	Mus musculus rhomboid, veinlet-like 1 (Drosophila) (Rhbdl1), mRNA [NM_144816]
A_52_P362917	2.3633	Pfkfb3	NM_133232	Mus musculus 6-phosphofructo-2-kinase/fructose-2,6-biphosphatase 3 (Pfkfb3), mRNA [NM_133232]
A_51_P267933	2.35936	A930034L06Rik	NM_175692	Mus musculus RIKEN cDNA A930034L06 gene (A930034L06Rik), mRNA [NM_175692]
A_51_P199725	2.35234	Arhgap24	NM_146161	Mus musculus Rho GTPase activating protein 24 (Arhgap24), transcript variant 2, mRNA [NM_146161]
A_52_P285992	2.35133	Zfp289	NM_023854	Mus musculus zinc finger protein 289 (Zfp289), mRNA [NM_023854]
A_51_P444301	2.34982	Brp44l	NM_018819	Mus musculus brain protein 44-like (Brp44l), mRNA [NM_018819]
A_51_P367834	2.34523	Gnai1	NM_010305	Mus musculus guanine nucleotide binding protein, alpha inhibiting 1 (Gnai1), mRNA [NM_010305]
A_52_P516187	2.34457	ENSMUST00000072166
A_51_P365351	2.34281	Dhdh	NM_027903	Mus musculus dihydrodiol dehydrogenase (dimeric) (Dhdh), mRNA [NM_027903]
A_51_P456957	2.34236	Pex11a	NM_011068	Mus musculus peroxisomal biogenesis factor 11a (Pex11a), mRNA [NM_011068]
A_52_P665675	2.34235	Abca1	NM_013454	Mus musculus ATP-binding cassette, sub-family A (ABC1), member 1 (Abca1), mRNA [NM_013454]
A_52_P158431	2.33819	Tshz2	NM_080455	Mus musculus teashirt zinc finger family member 2 (Tshz2), mRNA [NM_080455]
A_51_P162553	2.33757	Depdc2	AK018093	Mus musculus 11 days embryo head cDNA, RIKEN full-length enriched library, clone:6230420N16 product:hypothetical Pleckstrin putative G-protein interacting domain containing protein, full insert sequence. [AK018093]
A_51_P102257	2.33678	Tns1	AK053112	Mus musculus 0 day neonate lung cDNA, RIKEN full-length enriched library, clone:E030003A04 product:hypothetical (Phosphotyrosine protein) phosphatases II structure containing protein, full insert sequence. [AK053112]
A_51_P510059	2.33624	Dgat1	NM_010046	Mus musculus diacylglycerol O-acyltransferase 1 (Dgat1), mRNA [NM_010046]
A_52_P257812	2.33611	Lpl	NM_008509	Mus musculus lipoprotein lipase (Lpl), mRNA [NM_008509]
A_52_P148184	2.33344	1600014C10Rik	NM_028166	Mus musculus RIKEN cDNA 1600014C10 gene (1600014C10Rik), transcript variant 2, mRNA [NM_028166]
A_51_P335000	2.32819	Fhl1	NM_010211	Mus musculus four and a half LIM domains 1 (Fhl1), transcript variant 3, mRNA [NM_010211]
A_52_P229783	2.32497	Zadh1	NM_029880	Mus musculus zinc binding alcohol dehydrogenase, domain containing 1 (Zadh1), mRNA [NM_029880]
A_52_P529790	2.32493	Hisppd2a	AK160847	Mus musculus adult male brain cDNA, RIKEN full-length enriched library, clone:3526404N21 product:weakly similar to KIAA0377-like protein [Mus musculus], full insert sequence. [AK160847]
A_51_P167551	2.32107	BC031353	NM_153584	Mus musculus cDNA sequence BC031353 (BC031353), mRNA [NM_153584]
A_51_P255142	2.31888	Blcap	NM_016916	Mus musculus bladder cancer associated protein homolog (human) (Blcap), mRNA [NM_016916]
A_51_P362638	2.31733	Trf	NM_133977	Mus musculus transferrin (Trf), mRNA [NM_133977]
A_51_P279583	2.31722	Olfr1245	NM_146788	Mus musculus olfactory receptor 1245 (Olfr1245), mRNA [NM_146788]
A_52_P2800	2.31643	Aifm2	NM_153779	Mus musculus apoptosis-inducing factor, mitochondrion-associated 2 (Aifm2), transcript variant 1, mRNA [NM_153779]
A_52_P1083765	2.31583	Cul5	AK041861	Mus musculus 3 days neonate thymus cDNA, RIKEN full-length enriched library, clone:A630042J09 product:unclassifiable, full insert sequence [AK041861]
A_52_P204744	2.3146	Cd320	NM_019421	Mus musculus CD320 antigen (Cd320), mRNA [NM_019421]
A_52_P171197	2.31256	Gfra4	AB041809	Mus musculus brain cDNA, clone MNCb-1073 [AB041809]
A_51_P275845	2.31208	Rnf141	NM_025999	Mus musculus ring finger protein 141 (Rnf141), mRNA [NM_025999]
A_52_P680935	2.30764	Ghr	NM_010284	Mus musculus growth hormone receptor (Ghr), transcript variant 1, mRNA [NM_010284]
A_52_P306351	2.30681	Asph	AK165260	Mus musculus 6 days neonate spleen cDNA, RIKEN full-length enriched library, clone:F430004K08 product:aspartate-beta-hydroxylase, full insert sequence. [AK165260]
A_52_P661503	2.30621	Depdc6	AK080874	Mus musculus 4 days neonate male adipose cDNA, RIKEN full-length enriched library, clone:B430113B11 product:unclassifiable, full insert sequence. [AK080874]
A_51_P375039	2.30608	Slc25a17	NM_011399	Mus musculus solute carrier family 25 (mitochondrial carrier, peroxisomal membrane protein), member 17 (Slc25a17), mRNA [NM_011399]
A_52_P200155	2.30349	Ppp2r5a	NM_144880	Mus musculus protein phosphatase 2, regulatory subunit B (B56), alpha isoform (Ppp2r5a), mRNA [NM_144880]
A_51_P241995	2.30343	Col5a3	NM_016919	Mus musculus procollagen, type V, alpha 3 (Col5a3), mRNA [NM_016919]
A_51_P244154	2.30179	Lrrc8b	NM_001033550	Mus musculus leucine rich repeat containing 8 family, member B (Lrrc8b), mRNA [NM_001033550]
A_52_P859627	2.30166	BB537842	BB537842	BB537842 RIKEN full-length enriched, 0 day neonate eyeball Mus musculus cDNA clone E130008A03 3'. [BB537842]
A_52_P209484	2.29843	Tmem88	NM_025915	Mus musculus transmembrane protein 88 (Tmem88), mRNA [NM_025915]
A_51_P460869	2.29712	Prkag2	NM_145401	Mus musculus protein kinase, AMP-activated, gamma 2 non-catalytic subunit (Prkag2), mRNA [NM_145401]
A_51_P215475	2.29393	Ptprb	NM_029928	Mus musculus protein tyrosine phosphatase, receptor type, B (Ptprb), mRNA [NM_029928]
A_52_P279294	2.29287	2900062L11Rik	BC030351	Mus musculus RIKEN cDNA 2900062L11 gene, mRNA (cDNA clone MGC:40746 IMAGE:5365902), complete cds [BC030351]
A_51_P374468	2.28907	Hbb-b1	NM_008220	Mus musculus hemoglobin, beta adult major chain (Hbb-b1), mRNA [NM_008220]
A_52_P264571	2.28699	Mcf2l	NM_178076	Mus musculus mcf.2 transforming sequence-like (Mcf2l), mRNA [NM_178076]
A_51_P164504	2.28575	Apoc1	NM_007469	Mus musculus apolipoprotein C-I (Apoc1), mRNA [NM_007469]
A_52_P160209	2.28455	Sh3glb2	NM_139302	Mus musculus SH3-domain GRB2-like endophilin B2 (Sh3glb2), mRNA [NM_139302]
A_51_P431018	2.28253	Selenbp2	NM_019414	Mus musculus selenium binding protein 2 (Selenbp2), mRNA [NM_019414]
A_52_P20391	2.27883	LOC545261	CB182661	AGENCOURT_11383195 NIH_MGC_164 Mus musculus cDNA clone IMAGE:30243035 5', mRNA sequence [CB182661]
A_51_P389004	2.27827	Sgcd	NM_011891	Mus musculus sarcoglycan, delta (dystrophin-associated glycoprotein) (Sgcd), mRNA [NM_011891]
A_52_P105078	2.27637	Slc9a6	AK122232	Mus musculus mRNA for mKIAA0267 protein [AK122232]
A_52_P671543	2.27628	Pomc1	NM_008895	Mus musculus pro-opiomelanocortin-alpha (Pomc1), mRNA [NM_008895]
A_52_P64609	2.26681	Hist2h2aa1	NM_013549	Mus musculus histone cluster 2, H2aa1 (Hist2h2aa1), mRNA [NM_013549]
A_51_P298107	2.26433	Vit	NM_028813	Mus musculus vitrin (Vit), mRNA [NM_028813]
A_51_P444052	2.26422	Scp2	NM_011327	Mus musculus sterol carrier protein 2, liver (Scp2), mRNA [NM_011327]
A_51_P430055	2.2636	Tspan7	NM_019634	Mus musculus tetraspanin 7 (Tspan7), mRNA [NM_019634]
A_51_P189746	2.26341	Pim3	NM_145478	Mus musculus proviral integration site 3 (Pim3), mRNA [NM_145478]
A_51_P398723	2.26103	Flt1	NM_010228	Mus musculus FMS-like tyrosine kinase 1 (Flt1), mRNA [NM_010228]
A_51_P402165	2.26101	Rgs7	NM_011880	Mus musculus regulator of G protein signaling 7 (Rgs7), mRNA [NM_011880]
A_51_P476879	2.25916	Olfml1	NM_172907	Mus musculus olfactomedin-like 1 (Olfml1), mRNA [NM_172907]
A_52_P72654	2.25733	Slc25a17	NM_011399	Mus musculus solute carrier family 25 (mitochondrial carrier, peroxisomal membrane protein), member 17 (Slc25a17), mRNA [NM_011399]
A_52_P365660	2.25633	Lrrc4c	NM_178725	Mus musculus leucine rich repeat containing 4C (Lrrc4c), mRNA [NM_178725]
A_51_P379976	2.25529	Arl4a	NM_007487	Mus musculus ADP-ribosylation factor-like 4A (Arl4a), transcript variant 1, mRNA [NM_007487]
A_51_P432958	2.25463	Podn	NM_172874	Mus musculus podocan (Podn), mRNA [NM_172874]
A_52_P109010	2.254	Hipk3	XM_001001414	PREDICTED: Mus musculus homeodomain interacting protein kinase 3, transcript variant 4 (Hipk3), mRNA [XM_001001414]
A_52_P645862	2.25026	Agtr1a	NM_177322	Mus musculus angiotensin II receptor, type 1a (Agtr1a), mRNA [NM_177322]
A_52_P556586	2.24532	Znrf2	NM_199143	Mus musculus zinc and ring finger 2 (Znrf2), mRNA [NM_199143]
A_52_P562624	2.24528	Pkhd1l1	NM_138674	Mus musculus polycystic kidney and hepatic disease 1-like 1 (Pkhd1l1), mRNA [NM_138674]
A_51_P387437	2.24101	Sbsn	NM_172205	Mus musculus suprabasin (Sbsn), transcript variant 1, mRNA [NM_172205]
A_51_P416858	2.24038	Myl1	NM_021285	Mus musculus myosin, light polypeptide 1 (Myl1), mRNA [NM_021285]
A_51_P214087	2.23959	Cebpa	NM_007678	Mus musculus CCAAT/enhancer binding protein (C/EBP), alpha (Cebpa), mRNA [NM_007678]
A_51_P456466	2.23784	Mlxipl	NM_021455	Mus musculus MLX interacting protein-like (Mlxipl), mRNA [NM_021455]
A_51_P367837	2.23659	Gnai1	NM_010305	Mus musculus guanine nucleotide binding protein, alpha inhibiting 1 (Gnai1), mRNA [NM_010305]
A_52_P674694	2.23652	Rnf141	NM_025999	Mus musculus ring finger protein 141 (Rnf141), mRNA [NM_025999]
A_52_P83549	2.23602	H6pd	NM_173371	Mus musculus hexose-6-phosphate dehydrogenase (glucose 1-dehydrogenase) (H6pd), mRNA [NM_173371]
A_51_P148093	2.23253	Ptprm	NM_008984	Mus musculus protein tyrosine phosphatase, receptor type, M (Ptprm), mRNA [NM_008984]
A_51_P446112	2.23198	EG619719	XM_895406	PREDICTED: Mus musculus hypothetical protein LOC619719 (LOC619719), mRNA [XM_895406]
A_52_P877015	2.23168	Thrb	BC089035	Mus musculus thyroid hormone receptor beta, mRNA (cDNA clone MGC:115768 IMAGE:30695885), complete cds [BC089035]
A_52_P331762	2.22913	Lmo1	NM_057173	Mus musculus LIM domain only 1 (Lmo1), mRNA [NM_057173]
A_52_P387467	2.22897	RP23-68L5.1	NM_001081285	Mus musculus novel member of the major urinary protein (Mup) gene family (LOC620807), mRNA [NM_001081285]
A_51_P491504	2.22865	Aldh5a1	NM_172532	Mus musculus aldhehyde dehydrogenase family 5, subfamily A1 (Aldh5a1), mRNA [NM_172532]
A_52_P84315	2.2284	Chd7	NM_001081417	Mus musculus chromodomain helicase DNA binding protein 7 (Chd7), mRNA [NM_001081417]
A_51_P160363	2.22723	Utrn	Y12229	M.musculus mRNA for utrophin. [Y12229]
A_51_P380527	2.22332	4631427C17Rik	NM_021414	Mus musculus RIKEN cDNA 4631427C17 gene (4631427C17Rik), mRNA [NM_021414]
A_51_P312348	2.22193	Krt7	AK137217	Mus musculus adult male urinary bladder cDNA, RIKEN full-length enriched library, clone:9530049E07 product:keratin complex 2, basic, gene 7, full insert sequence. [AK137217]
A_52_P64376	2.22178	Mogat1	NM_026713	Mus musculus monoacylglycerol O-acyltransferase 1 (Mogat1), mRNA [NM_026713]
A_52_P573255	2.21968	Cdc42ep1	NM_027219	Mus musculus CDC42 effector protein (Rho GTPase binding) 1 (Cdc42ep1), mRNA [NM_027219]
A_52_P205695	2.21497	Mettl7a	NM_027334	Mus musculus methyltransferase like 7A (Mettl7a), mRNA [NM_027334]
A_52_P662226	2.2149	Pon3	NM_173006	Mus musculus paraoxonase 3 (Pon3), mRNA [NM_173006]
A_52_P681391	2.21176	G0s2	NM_008059	Mus musculus G0/G1 switch gene 2 (G0s2), mRNA [NM_008059]
A_51_P327451	2.21153	Alas2	NM_009653	Mus musculus aminolevulinic acid synthase 2, erythroid (Alas2), mRNA [NM_009653]
A_51_P452280	2.20894	Mtcp1	NM_010839	Mus musculus mature T-cell proliferation 1 (Mtcp1), transcript variant 2, mRNA [NM_010839]
A_51_P256665	2.20857	Pon3	NM_173006	Mus musculus paraoxonase 3 (Pon3), mRNA [NM_173006]
A_52_P67200	2.2053	Stt3b	NM_024222	Mus musculus STT3, subunit of the oligosaccharyltransferase complex, homolog B (S. cerevisiae) (Stt3b), mRNA [NM_024222]
A_51_P447976	2.20443	4930431B09Rik	BC046309	Mus musculus cDNA clone IMAGE:6306854, partial cds. [BC046309]
A_51_P497661	2.20364	Ntn4	NM_021320	Mus musculus netrin 4 (Ntn4), mRNA [NM_021320]
A_51_P231920	2.20354	Lman2l	NM_001013374	Mus musculus lectin, mannose-binding 2-like (Lman2l), mRNA [NM_001013374]
A_51_P150120	2.19976	Mgst2	NM_174995	Mus musculus microsomal glutathione S-transferase 2 (Mgst2), mRNA [NM_174995]
A_51_P139651	2.19874	Nos3	NM_008713	Mus musculus nitric oxide synthase 3, endothelial cell (Nos3), mRNA [NM_008713]
A_52_P5891	2.19723	1500005K14Rik	XM_893392	PREDICTED: Mus musculus RIKEN cDNA 1500005K14 gene (1500005K14Rik), mRNA [XM_893392]
A_51_P334685	2.19673	Mbc2	NM_011843	Mus musculus membrane bound C2 domain containing protein (Mbc2), mRNA [NM_011843]
A_51_P508510	2.19528	Notch1	Z11886	M.musculus notch-1 mRNA. [Z11886]
A_51_P426466	2.19218	Rai2	NM_198409	Mus musculus retinoic acid induced 2 (Rai2), mRNA [NM_198409]
A_52_P649074	2.19194	Vps13c	NM_177184	Mus musculus vacuolar protein sorting 13C (yeast) (Vps13c), mRNA [NM_177184]
A_51_P189814	2.19137	Cldn5	NM_013805	Mus musculus claudin 5 (Cldn5), mRNA [NM_013805]
A_52_P224413	2.19082	LOC673378	XR_004220	PREDICTED: Mus musculus hypothetical protein LOC673378 (LOC673378), mRNA [XR_004220]
A_51_P324814	2.18816	Krt18	NM_010664	Mus musculus keratin 18 (Krt18), mRNA [NM_010664]
A_52_P594636	2.1874	Ugt1a@	NM_201410	Mus musculus UDP glucuronosyltransferase 1 family, polypeptide A6B (Ugt1a6b), mRNA [NM_201410]
A_51_P302327	2.18478	Lgals7	NM_008496	Mus musculus lectin, galactose binding, soluble 7 (Lgals7), mRNA [NM_008496]
A_51_P296090	2.1847	BC021611	NM_144932	Mus musculus cDNA sequence BC021611 (BC021611), mRNA [NM_144932]
A_52_P642726	2.18442	Apcdd1	NM_133237	Mus musculus adenomatosis polyposis coli down-regulated 1 (Apcdd1), mRNA [NM_133237]
A_52_P120680	2.18431	Nfia	AK173173	Mus musculus mRNA for mKIAA1439 protein [AK173173]
A_52_P93837	2.18314	Mme	NM_008604	Mus musculus membrane metallo endopeptidase (Mme), mRNA [NM_008604]
A_51_P466148	2.18061	Bckdha	NM_007533	Mus musculus branched chain ketoacid dehydrogenase E1, alpha polypeptide (Bckdha), mRNA [NM_007533]
A_52_P145912	2.17821	Mylk	NM_139300	Mus musculus myosin, light polypeptide kinase (Mylk), mRNA [NM_139300]
A_51_P221062	2.17134	Prkar2b	NM_011158	Mus musculus protein kinase, cAMP dependent regulatory, type II beta (Prkar2b), mRNA [NM_011158]
A_52_P440885	2.17104	9630023C09Rik	AK084616	Mus musculus 13 days embryo heart cDNA, RIKEN full-length enriched library, clone:D330021P03 product:unclassifiable, full insert sequence [AK084616]
A_52_P561650	2.16682	Vwa1	NM_147776	Mus musculus von Willebrand factor A domain containing 1 (Vwa1), mRNA [NM_147776]
A_51_P177171	2.16624	Tie1	NM_011587	Mus musculus tyrosine kinase receptor 1 (Tie1), mRNA [NM_011587]
A_52_P549827	2.16599	Mgst1	NM_019946	Mus musculus microsomal glutathione S-transferase 1 (Mgst1), mRNA [NM_019946]
A_51_P215077	2.1651	Mgst3	NM_025569	Mus musculus microsomal glutathione S-transferase 3 (Mgst3), mRNA [NM_025569]
A_51_P337510	2.16421	Cd320	NM_019421	Mus musculus CD320 antigen (Cd320), mRNA [NM_019421]
A_52_P273120	2.16368	Myl1	AK009938	Mus musculus adult male tongue cDNA, RIKEN full-length enriched library, clone:2310051N24 product:myosin light chain, alkali, fast skeletal muscle, full insert sequence. [AK009938]
A_52_P33453	2.16298	NAP029947-1
A_51_P107782	2.16219	Fvt1	BC023820	Mus musculus follicular lymphoma variant translocation 1, mRNA (cDNA clone MGC:36450 IMAGE:5354804), complete cds. [BC023820]
A_52_P381430	2.15904	Tbc1d4	NM_001081278	Mus musculus TBC1 domain family, member 4 (Tbc1d4), mRNA [NM_001081278]
A_51_P125205	2.1588	Aqp1	NM_007472	Mus musculus aquaporin 1 (Aqp1), mRNA [NM_007472]
A_51_P391082	2.15735	Aco1	NM_007386	Mus musculus aconitase 1 (Aco1), mRNA [NM_007386]
A_51_P106527	2.15726	9530058B02Rik	NM_026633	Mus musculus RIKEN cDNA 9530058B02 gene (9530058B02Rik), mRNA [NM_026633]
A_51_P414706	2.15178	Ddt	NM_010027	Mus musculus D-dopachrome tautomerase (Ddt), mRNA [NM_010027]
A_51_P324742	2.15044	1700013G24Rik	NM_027063	Mus musculus RIKEN cDNA 1700013G24 gene (1700013G24Rik), mRNA [NM_027063]
A_51_P142421	2.15029	Rspo1	NM_138683	Mus musculus R-spondin homolog (Xenopus laevis) (Rspo1), mRNA [NM_138683]
A_51_P435068	2.15006	Acadsb	NM_025826	Mus musculus acyl-Coenzyme A dehydrogenase, short/branched chain (Acadsb), mRNA [NM_025826]
A_52_P609319	2.14935	Nrip1	AK020076	Mus musculus 13 days embryo male testis cDNA, RIKEN full-length enriched library, clone:6030458L20 product:unclassifiable, full insert sequence. [AK020076]
A_51_P479311	2.14896	Gstm1	NM_010358	Mus musculus glutathione S-transferase, mu 1 (Gstm1), mRNA [NM_010358]
A_52_P685821	2.14762	D730040F13Rik	NM_175518	Mus musculus RIKEN cDNA D730040F13 gene (D730040F13Rik), mRNA [NM_175518]
A_51_P247481	2.14754	Adck1	NM_028105	Mus musculus aarF domain containing kinase 1 (Adck1), mRNA [NM_028105]
A_52_P351574	2.14558	Plcb1	NM_019677	Mus musculus phospholipase C, beta 1 (Plcb1), mRNA [NM_019677]
A_51_P310741	2.14537	Olfr791	NM_146930	Mus musculus olfactory receptor 791 (Olfr791), mRNA [NM_146930]
A_51_P138939	2.1446	Robo4	NM_028783	Mus musculus roundabout homolog 4 (Drosophila) (Robo4), mRNA [NM_028783]
A_52_P288251	2.14247	BC054438	NM_001001183	Mus musculus cDNA sequence BC054438 (BC054438), mRNA [NM_001001183]
A_52_P609778	2.14165	Mgll	NM_011844	Mus musculus monoglyceride lipase (Mgll), mRNA [NM_011844]
A_51_P485810	2.13876	Pygb	NM_153781	Mus musculus brain glycogen phosphorylase (Pygb), mRNA [NM_153781]
A_52_P661731	2.13868	Mosc2	NM_133684	Mus musculus MOCO sulphurase C-terminal domain containing 2 (Mosc2), mRNA [NM_133684]
A_51_P276063	2.13691	Phyh	NM_010726	Mus musculus phytanoyl-CoA hydroxylase (Phyh), mRNA [NM_010726]
A_51_P114577	2.13401	9130213B05Rik	AK161172	Mus musculus 0 day neonate head cDNA, RIKEN full-length enriched library, clone:4831433I04 product:Castration induced prostatic apoptosis related protein-1, (CIPAR- 1) homolog [Rattus norvegicus], full insert sequence [AK161172]
A_51_P454949	2.13249	Gstm3	NM_010359	Mus musculus glutathione S-transferase, mu 3 (Gstm3), mRNA [NM_010359]
A_51_P139920	2.13169	Mgll	NM_011844	Mus musculus monoglyceride lipase (Mgll), mRNA [NM_011844]
A_52_P453884	2.12823	Foxo1	NM_019739	Mus musculus forkhead box O1 (Foxo1), mRNA [NM_019739]
A_51_P505738	2.12242	BC054059	NM_145635	Mus musculus cDNA sequence BC054059 (BC054059), mRNA [NM_145635]
A_51_P175018	2.12023	Apcdd1	AK157407	Mus musculus activated spleen cDNA, RIKEN full-length enriched library, clone:F830213N15 product:Ethanol induced gene product, full insert sequence. [AK157407]
A_51_P168894	2.1197	Tmem16a	NM_178642	Mus musculus transmembrane protein 16A (Tmem16a), mRNA [NM_178642]
A_52_P8227	2.11711	Lypla1	NM_008866	Mus musculus lysophospholipase 1 (Lypla1), mRNA [NM_008866]
A_51_P425680	2.11383	Ivd	NM_019826	Mus musculus isovaleryl coenzyme A dehydrogenase (Ivd), mRNA [NM_019826]
A_52_P112017	2.11326	Tspo	NM_009775	Mus musculus translocator protein (Tspo), mRNA [NM_009775]
A_52_P505157	2.11197	Fsd2	NM_172904	Mus musculus fibronectin type III and SPRY domain containing 2 (Fsd2), mRNA [NM_172904]
A_52_P71726	2.11019	Ccdc85a	NM_181577	Mus musculus coiled-coil domain containing 85A (Ccdc85a), mRNA [NM_181577]
A_51_P440315	2.1086	Gys2	NM_145572	Mus musculus glycogen synthase 2 (Gys2), mRNA [NM_145572]
A_51_P478419	2.10667	Unc45b	NM_178680	Mus musculus unc-45 homolog B (C. elegans) (Unc45b), mRNA [NM_178680]
A_51_P296036	2.10546	Nrbp2	NM_144847	Mus musculus nuclear receptor binding protein 2 (Nrbp2), mRNA [NM_144847]
A_51_P488739	2.10264	Gpr109a	NM_030701	Mus musculus G protein-coupled receptor 109A (Gpr109a), mRNA [NM_030701]
A_52_P18068	2.1024	4932441K18Rik	NM_178935	Mus musculus RIKEN cDNA 4932441K18 gene (4932441K18Rik), mRNA [NM_178935]
A_51_P459240	2.1018	Gstk1	AK002661	Mus musculus adult male kidney cDNA, RIKEN full-length enriched library, clone:0610025I19 product:GLUTATHIONE S-TRANSFERASE, MITOCHONDRIAL (EC 2.5.1.18) (GST 13-13) (GLUTATHIONE S-TRANSFERASE SUBUNIT 13) (GST CLASS-KAPPA) homolog [Rattus norvegicus],...
A_51_P367947	2.10174	Arhgap29	NM_172525	Mus musculus Rho GTPase activating protein 29 (Arhgap29), mRNA [NM_172525]
A_52_P211197	2.09994	2410066E13Rik	NM_026629	Mus musculus RIKEN cDNA 2410066E13 gene (2410066E13Rik), mRNA [NM_026629]
A_51_P244540	2.09958	Ntsr2	NM_008747	Mus musculus neurotensin receptor 2 (Ntsr2), mRNA [NM_008747]
A_52_P657844	2.09879	Zbtb20	AK038731	Mus musculus adult male hypothalamus cDNA, RIKEN full-length enriched library, clone:A230057M07 product:zinc finger protein 288, full insert sequence. [AK038731]
A_52_P238693	2.09704	Ngly1	NM_021504	Mus musculus N-glycanase 1 (Ngly1), mRNA [NM_021504]
A_51_P221651	2.09433	Cabc1	NM_023341	Mus musculus chaperone, ABC1 activity of bc1 complex like (S. pombe) (Cabc1), mRNA [NM_023341]
A_51_P424739	2.0923	Nmnat3	NM_144533	Mus musculus nicotinamide nucleotide adenylyltransferase 3 (Nmnat3), mRNA [NM_144533]
A_52_P635271	2.09023	Btbd6	NM_201646	Mus musculus BTB (POZ) domain containing 6 (Btbd6), mRNA [NM_201646]
A_51_P330428	2.08947	Eif4ebp1	NM_007918	Mus musculus eukaryotic translation initiation factor 4E binding protein 1 (Eif4ebp1), mRNA [NM_007918]
A_52_P540991	2.08942	Gfap	NM_010277	Mus musculus glial fibrillary acidic protein (Gfap), mRNA [NM_010277]
A_51_P434859	2.08941	Mllt4	NM_010806	Mus musculus myeloid/lymphoid or mixed lineage-leukemia translocation to 4 homolog (Drosophila) (Mllt4), mRNA [NM_010806]
A_51_P142972	2.08939	Prdm8	NM_029947	Mus musculus PR domain containing 8 (Prdm8), mRNA [NM_029947]
A_51_P262721	2.08914	ENSMUST00000050697		RIKEN cDNA 0610009L18 gene [Source:MarkerSymbol;Acc:MGI:1914088] [ENSMUST00000050697]
A_52_P2520	2.08666	Blcap	NM_016916	Mus musculus bladder cancer associated protein homolog (human) (Blcap), mRNA [NM_016916]
A_51_P243393	2.0844	Olfr1163	NM_146644	Mus musculus olfactory receptor 1163 (Olfr1163), mRNA [NM_146644]
A_52_P655803	2.08094	Chpt1	NM_144807	Mus musculus choline phosphotransferase 1 (Chpt1), mRNA [NM_144807]
A_52_P740427	2.08015	EG624219	NM_001080940	Mus musculus predicted gene, EG624219 (EG624219), mRNA [NM_001080940]
A_51_P510764	2.07931	A530016O06Rik	AK040702	Mus musculus adult male aorta and vein cDNA, RIKEN full-length enriched library, clone:A530016O06 product:hypothetical SUR2-type hydroxylase/desaturase catalytic domain containing protein, full insert sequence. [AK040702]
A_52_P246248	2.0788	AF240166	AF240166	Mus musculus MRP3 mRNA, complete cds. [AF240166]
A_52_P615096	2.07841	Acox1	NM_015729	Mus musculus acyl-Coenzyme A oxidase 1, palmitoyl (Acox1), mRNA [NM_015729]
A_52_P212473	2.07718	C730049O14Rik	AK050462	Mus musculus adult male liver tumor cDNA, RIKEN full-length enriched library, clone:C730049O14 product:unclassifiable, full insert sequence [AK050462]
A_52_P399095	2.07386	9030224M15Rik	NM_177793	Mus musculus RIKEN cDNA 9030224M15 gene (9030224M15Rik), mRNA [NM_177793]
A_52_P306065	2.07383	Nuak1	AK020957	Mus musculus adult male corpora quadrigemina cDNA, RIKEN full-length enriched library, clone:B230104P22 product:unclassifiable, full insert sequence. [AK020957]
A_51_P258179	2.07349	Ak2	NM_016895	Mus musculus adenylate kinase 2 (Ak2), transcript variant 2, mRNA [NM_016895]
A_52_P629821	2.0713	Hisppd2a	NM_178795	Mus musculus histidine acid phosphatase domain containing 2A (Hisppd2a), mRNA [NM_178795]
A_51_P395164	2.06926	Pex16	NM_145122	Mus musculus peroxisome biogenesis factor 16 (Pex16), mRNA [NM_145122]
A_51_P427432	2.06916	Grhpr	NM_080289	Mus musculus glyoxylate reductase/hydroxypyruvate reductase (Grhpr), mRNA [NM_080289]
A_51_P222657	2.06867	Tspo	NM_009775	Mus musculus translocator protein (Tspo), mRNA [NM_009775]
A_51_P268843	2.06743	Rasip1	NM_028544	Mus musculus Ras interacting protein 1 (Rasip1), mRNA [NM_028544]
A_52_P105599	2.06684	Tns1	AK087187	Mus musculus 0 day neonate lung cDNA, RIKEN full-length enriched library, clone:E030033B01 product:similar to TENSIN [Gallus gallus], full insert sequence. [AK087187]
A_51_P259876	2.06541	Dock9	NM_001081039	Mus musculus dedicator of cytokinesis 9 (Dock9), mRNA [NM_001081039]
A_51_P204080	2.06206	Hk2	NM_013820	Mus musculus hexokinase 2 (Hk2), mRNA [NM_013820]
A_51_P400040	2.05939	Ubxd4	NM_145441	Mus musculus UBX domain containing 4 (Ubxd4), mRNA [NM_145441]
A_52_P206925	2.05925	Parp16	NM_177460	Mus musculus poly (ADP-ribose) polymerase family, member 16 (Parp16), mRNA [NM_177460]
A_51_P161342	2.05921	Abcb6	NM_023732	Mus musculus ATP-binding cassette, sub-family B (MDR/TAP), member 6 (Abcb6), mRNA [NM_023732]
A_51_P144264	2.05878	Klf2	NM_008452	Mus musculus Kruppel-like factor 2 (lung) (Klf2), mRNA [NM_008452]
A_52_P483104	2.05746	Lpin1	NM_015763	Mus musculus lipin 1 (Lpin1), transcript variant 2, mRNA [NM_015763]
A_51_P308681	2.05702	Ccdc90a	NM_001081059	Mus musculus coiled-coil domain containing 90A (Ccdc90a), mRNA [NM_001081059]
A_51_P338705	2.0563	Ankrd15	NM_181404	Mus musculus ankyrin repeat domain 15 (Ankrd15), mRNA [NM_181404]
A_52_P320761	2.05626	LOC634100		Immunoglobulin heavy chain V gene segment [Source:IMGT/GENE_DB;Acc:IGHV1-31] [ENSMUST00000103511]
A_51_P513244	2.05573	4930422I07Rik	XM_150216	PREDICTED: Mus musculus RIKEN cDNA 4930422I07 gene (4930422I07Rik), mRNA [XM_150216]
A_52_P373938	2.05505	Gpd2	AK080240	Mus musculus adult male aorta and vein cDNA, RIKEN full-length enriched library, clone:A530087K12 product:unclassifiable, full insert sequence [AK080240]
A_51_P475378	2.05413	Echdc3	NM_024208	Mus musculus enoyl Coenzyme A hydratase domain containing 3 (Echdc3), mRNA [NM_024208]
A_52_P173442	2.05261	4933413A10Rik	AK030181	Mus musculus adult male testis cDNA, RIKEN full-length enriched library, clone:4933413A10 product:hypothetical Sulfotransferase containing protein, full insert sequence [AK030181]
A_51_P517157	2.05089	Tmem43	NM_028766	Mus musculus transmembrane protein 43 (Tmem43), mRNA [NM_028766]
A_51_P234692	2.05058	2310043N10Rik	AK028745	Mus musculus 10 days neonate skin cDNA, RIKEN full-length enriched library, clone:4732452C17 product:unclassifiable, full insert sequence [AK028745]
A_51_P366704	2.04885	Acox1	NM_015729	Mus musculus acyl-Coenzyme A oxidase 1, palmitoyl (Acox1), mRNA [NM_015729]
A_51_P301998	2.04786	Fmo2	NM_018881	Mus musculus flavin containing monooxygenase 2 (Fmo2), mRNA [NM_018881]
A_51_P404815	2.04352	Apol6	AK010208	Mus musculus adult male tongue cDNA, RIKEN full-length enriched library, clone:2310076O14 product:hypothetical Bacterial regulatory protein, LysR family containing protein, full insert sequence. [AK010208]
A_51_P521304	2.04336	Klhl13	NM_026167	Mus musculus kelch-like 13 (Drosophila) (Klhl13), mRNA [NM_026167]
A_52_P121675	2.04073	Cebpg	NM_009884	Mus musculus CCAAT/enhancer binding protein (C/EBP), gamma (Cebpg), mRNA [NM_009884]
A_51_P405606	2.04057	Ndrg1	NM_008681	Mus musculus N-myc downstream regulated gene 1 (Ndrg1), mRNA [NM_008681]
A_51_P513720	2.04034	Cdkn2c	U19596	Mus musculus Cdk4 and Cdk6 inhibitor p18 protein mRNA, complete cds. [U19596]
A_51_P369381	2.04015	1110021L09Rik	AK003902	Mus musculus 18-day embryo whole body cDNA, RIKEN full-length enriched library, clone:1110021L09 product:hypothetical (Pro)aerolysin, pore-forming lobe structure containing protein, full insert sequence. [AK003902]
A_51_P274163	2.03903	Clybl	NM_029556	Mus musculus citrate lyase beta like (Clybl), mRNA [NM_029556]
A_51_P183940	2.0388	Stk39	NM_016866	Mus musculus serine/threonine kinase 39, STE20/SPS1 homolog (yeast) (Stk39), mRNA [NM_016866]
A_52_P68477	2.03872	Zfp809	NM_172763	Mus musculus zinc finger protein 809 (Zfp809), mRNA [NM_172763]
A_51_P447216	2.03754	Rasa2	NM_053268	Mus musculus RAS p21 protein activator 2 (Rasa2), mRNA [NM_053268]
A_52_P481686	2.03573	Wtip	NM_207212	Mus musculus WT1-interacting protein (Wtip), mRNA [NM_207212]
A_51_P272147	2.03266	1500005A01Rik	NM_033146	Mus musculus RIKEN cDNA 1500005A01 gene (1500005A01Rik), mRNA [NM_033146]
A_52_P115579	2.02831	Fbxo45	NM_173439	Mus musculus F-box protein 45 (Fbxo45), mRNA [NM_173439]
A_51_P418765	2.01985	Sephs2	NM_009266	Mus musculus selenophosphate synthetase 2 (Sephs2), mRNA [NM_009266]
A_52_P675157	2.01529	Acp5	NM_007388	Mus musculus acid phosphatase 5, tartrate resistant (Acp5), mRNA [NM_007388]
A_51_P127469	2.01491	Hagh	NM_024284	Mus musculus hydroxyacyl glutathione hydrolase (Hagh), mRNA [NM_024284]
A_52_P595687	2.01448	Brp44l	NM_018819	Mus musculus brain protein 44-like (Brp44l), mRNA [NM_018819]
A_52_P676510	2.01445	Tgtp	NM_011579	Mus musculus T-cell specific GTPase (Tgtp), mRNA [NM_011579]
A_52_P440314	2.01421	6430704M03Rik	AK078331	Mus musculus adult male olfactory brain cDNA, RIKEN full-length enriched library, clone:6430704M03 product:similar to BRAIN PROTEIN (FRAGMENT) [Homo sapiens], full insert sequence [AK078331]
A_52_P451245	2.01026	Immt	NM_029673	Mus musculus inner membrane protein, mitochondrial (Immt), mRNA [NM_029673]
A_51_P346815	2.00907	6530401D17Rik	AK018307	Mus musculus 10 days neonate cerebellum cDNA, RIKEN full-length enriched library, clone:6530401D17 product:similar to MICROSOMAL SIGNAL PEPTIDASE 23 KDA SUBUNIT (EC 3.4.-.-) (SPASE 22 KDA SUBUNIT) (SPC22 [AK018307]
A_51_P295663	2.00869	1700123L14Rik	AK131738	Mus musculus adult male testis cDNA, RIKEN full-length enriched library, clone:1700047N01 product:hypothetical protein, full insert sequence [AK131738]
A_51_P115346	2.006	P2rxl1	NM_011028	Mus musculus purinergic receptor P2X-like 1, orphan receptor (P2rxl1), mRNA [NM_011028]
A_52_P676198	2.00452	2010011I20Rik	NM_025912	Mus musculus RIKEN cDNA 2010011I20 gene (2010011I20Rik), mRNA [NM_025912]
A_52_P343406	2.00309	Coq5	NM_026504	Mus musculus coenzyme Q5 homolog, methyltransferase (yeast) (Coq5), mRNA [NM_026504]
A_51_P116395	2.00278	Dhrs7b	NM_145428	Mus musculus dehydrogenase/reductase (SDR family) member 7B (Dhrs7b), mRNA [NM_145428]
A_51_P178735	2.00231	Hibch	NM_146108	Mus musculus 3-hydroxyisobutyryl-Coenzyme A hydrolase (Hibch), mRNA [NM_146108]
A_51_P335104	2.00127	1110030E23Rik	AK153779	Mus musculus 3 days neonate thymus cDNA, RIKEN full-length enriched library, clone:A630088N05 product:hypothetical Haem peroxidase, plant/fungal/bacterial containing protein, full insert sequence. [AK153779]
A_52_P301103	2.00089	Tob2	NM_020507	Mus musculus transducer of ERBB2, 2 (Tob2), mRNA [NM_020507]
A_52_P258338	2.00054	Mobkl2b	NM_178061	Mus musculus MOB1, Mps One Binder kinase activator-like 2B (yeast) (Mobkl2b), mRNA [NM_178061]
A_52_P57622	2.00053	8430416H19Rik	NM_198636	Mus musculus RIKEN cDNA 8430416H19 gene (8430416H19Rik), mRNA [NM_198636]

## Sheet: Hif1a-Down
ProbeName	Fold change	GeneSymbol	GenbankAccession	Description
A_52_P10793	0.023406	Ptn	NM_008973	Mus musculus pleiotrophin (Ptn), mRNA [NM_008973]
A_51_P358765	0.0259019	Spp1	NM_009263	Mus musculus secreted phosphoprotein 1 (Spp1), mRNA [NM_009263]
A_52_P475805	0.0264356	Col12a1	NM_007730	Mus musculus procollagen, type XII, alpha 1 (Col12a1), mRNA [NM_007730]
A_52_P474089	0.0308778	Capn6	NM_007603	Mus musculus calpain 6 (Capn6), mRNA [NM_007603]
A_52_P26161	0.0319579	Ptx3	NM_008987	Mus musculus pentraxin related gene (Ptx3), mRNA [NM_008987]
A_51_P516833	0.0337538	Igf2	NM_010514	Mus musculus insulin-like growth factor 2 (Igf2), mRNA [NM_010514]
A_52_P177324	0.0365891	Dlk1	NM_010052	Mus musculus delta-like 1 homolog (Drosophila) (Dlk1), mRNA [NM_010052]
[truncated: 1,238 more rows]

## Sheet: Both-Up
ProbeName	GeneSymbol	GenbankAccession	Description
[truncated: 345 more rows]

[truncated: 1 more sheets: Both-Down]
